# Supplementary material
Source: publisher figshare collection journal article supplement (https://geolsoc.figshare.com/ndownloader/files/12883751)
Supplement: Supplementary file 1 [file 12883751]

Section ID,,,,,,,,,,,,Geochemical data,,,,,,,,,,,,,,,,,,,,,,,,,,,,,,,,,,,,,,,,,,,,,,,,,,,,,,,,,,,,,,,,Rock-Eval 6 data,,,,,,,,,,,,,,,
,,,,,,,,,,,10.00588235,Method,LF200,LF200,LF200,LF200,LF200,LF200,LF200,LF200,LF200,LF200,LF200,LF200,LF200,LF200,LF200,LF200,,LF200,LF200,LF200,LF200,LF200,LF200,LF200,LF200,LF200,LF200,LF200,LF200,LF200,LF200,LF200,LF200,LF200,LF200,LF200,LF200,LF200,LF200,LF200,LF200,LF200,LF200,LF200,LF200,LF200,LF200,TC000,TC000,AQ200,AQ200,AQ200,AQ200,AQ200,AQ200,AQ200,AQ200,AQ200,AQ200,AQ200,AQ200,AQ200,AQ200,,,,,,,,,,,,,,,,
Publication/year,Well/outcrop,Section name,UWID (for wells),NTS map area,Lat (NAD83),Long (NAD83),Formation,Stratigraphic Member,Sample type (core/cutting/outcrop),"Depth/elevation (MD for wells, ASL or datum metreage for outcrops)",Sample field ID,Analyte,SiO2,Al2O3,Fe2O3,MgO,CaO,Na2O,K2O,TiO2,P2O5,MnO,Cr2O3,Ni,Sc,LOI,Sum,Ba,Ba,Be,Co,Cs,Ga,Hf,Nb,Rb,Sn,Sr,Ta,Th,U,V,W,Zr,Y,La,Ce,Pr,Nd,Sm,Eu,Gd,Tb,Dy,Ho,Er,Tm,Yb,Lu,TOT/C,TOT/S,Mo,Cu,Pb,Zn,Ni,As,Cd,Sb,Bi,Ag,Au,Hg,Tl,Se,Depth,Qty,S1,S2,PI,S3,Tmax,Tpeak,S3CO,PC(%),TOC,RC%,HI,OICO,OI,MINC%
,,,,,,,,,,,,Unit,%,%,%,%,%,%,%,%,%,%,%,PPM,PPM,%,%,PPM,%,PPM,PPM,PPM,PPM,PPM,PPM,PPM,PPM,PPM,PPM,PPM,PPM,PPM,PPM,PPM,PPM,PPM,PPM,PPM,PPM,PPM,PPM,PPM,PPM,PPM,PPM,PPM,PPM,PPM,PPM,%,%,PPM,PPM,PPM,PPM,PPM,PPM,PPM,PPM,PPM,PPM,PPB,PPM,PPM,PPM,,,,,,,,,,,,,,,,
,,,,,,,,,,,,MDL,0.01,0.01,0.04,0.01,0.01,0.01,0.01,0.01,0.01,0.01,0.002,20,1,-5.1,0.01,1,,1,0.2,0.1,0.5,0.1,0.1,0.1,1,0.5,0.1,0.2,0.1,8,0.5,0.1,0.1,0.1,0.1,0.02,0.3,0.05,0.02,0.05,0.01,0.05,0.02,0.03,0.01,0.05,0.01,0.02,0.02,0.1,0.1,0.1,1,0.1,0.5,0.1,0.1,0.1,0.1,0.5,0.01,0.1,0.5,,,,,,,,,,,,,,,,
,,,,,,,,,,,,,,,,,,,,,,,,,,,,,,,,,,,,,,,,,,,,,,,,,,,,,,,,,,,,,,,,,,,,,,,,,,,,,,,,,,,,,,,,,,,
"Gal and Pyle, 2012, NWT OR 2012 009",well,Bear Rock O-20,300O206500125450,96C,64.996488,-125.7920596,Imperial,Loon Creek,rock chips,40,"BEAR ROCK O-20-40			",,62.87,12.32,5.24,2.42,2.46,0.5,2.39,0.57,0.09,0.03,0.01,101,13,10.8,99.68,1593,,<1,17.1,6.7,13.9,2.8,9.2,106.9,2,144.7,0.5,8.2,9.6,281,1.1,97.4,21.6,29.7,54.3,6.38,27,4.48,0.98,4.26,0.58,3.6,0.68,2.1,0.31,1.96,0.3,3.75,1.75,21.5,52.1,12.2,153,88.4,17.2,1.2,0.7,0.1,0.2,<0.5,0.18,0.5,3.8,,70.4,0.86,6.8,0.11,0.34,438,477,0.06,0.65,2.23,1.58,304,3,15,2.7
"Gal and Pyle, 2012, NWT OR 2012 009",well,Bear Rock O-20,300O206500125450,96C,64.996488,-125.7920596,Imperial,Loon Creek,rock chips,45,"BEAR ROCK O-20-45			",,63.24,12.38,4.83,2.38,2.57,0.5,2.46,0.54,0.09,0.03,0.012,93,12,10.7,99.7,1429,,2,16.6,6.2,14,2.9,7.9,107,1,143.1,0.5,8.1,10.3,259,1.6,92.6,24.3,28,52.3,6.38,24,4.93,0.9,3.82,0.59,3.94,0.65,2.08,0.31,1.75,0.3,3.85,1.47,20.2,54.2,10.4,144,90,18.7,1.1,0.6,<0.1,0.2,<0.5,0.15,0.5,2.8,,70.9,1.42,8.6,0.14,0.49,438,477,0.14,0.86,2.63,1.77,327,5,19,1.1
"Gal and Pyle, 2012, NWT OR 2012 009",well,Bear Rock O-20,300O206500125450,96C,64.996488,-125.7920596,Imperial,Loon Creek,rock chips,50,"BEAR ROCK O-20-50			",,65.28,12.42,4.65,1.97,1.2,0.47,2.51,0.57,0.09,0.02,0.011,130,13,10.5,99.66,1519,,<1,15.9,7.3,13.6,2.6,9.5,110,2,143.7,0.8,8.5,10.1,464,1.9,100.3,26.2,29.7,57.3,6.78,28,4.74,1.02,4.33,0.64,3.93,0.75,2.35,0.36,2.49,0.33,3.93,1.68,27.6,64.5,12.2,230,108.2,19.2,1.8,0.9,0.1,0.4,<0.5,0.14,0.6,5.7,,70.6,1.92,11.1,0.15,0.37,440,479,0.15,1.11,3.41,2.3,326,4,11,0.5
"Gal and Pyle, 2012, NWT OR 2012 009",well,Bear Rock O-20,300O206500125450,96C,64.996488,-125.7920596,Imperial,Mirror Lake,rock chips,55,"BEAR ROCK O-20-55			",,58.42,16.75,5.79,2.23,1.25,0.47,3.21,0.68,0.08,0.03,0.015,98,17,10.7,99.66,1581,,4,17.3,8.8,20.2,3,10.5,154.2,2,159.6,0.6,10.2,5.7,291,1.2,107,23.4,33.6,64.6,7.36,31.2,5.06,0.95,4.07,0.59,3.81,0.79,2.13,0.31,2.17,0.32,2.17,1.6,10.1,41.9,11.3,157,78.9,12.9,0.7,0.3,0.1,0.2,<0.5,0.08,0.6,2.4,,70.3,1.05,3.6,0.23,0.35,439,478,0.1,0.4,1.4,1,258,7,25,0.5
"Gal and Pyle, 2012, NWT OR 2012 009",well,Bear Rock O-20,300O206500125450,96C,64.996488,-125.7920596,Imperial,Mirror Lake,rock chips,60,"BEAR ROCK O-20-60			",,56.74,17.39,6.35,2.54,1.45,0.51,3.26,0.71,0.08,0.04,0.015,73,18,10.6,99.66,1768,,<1,17.7,9.7,20.1,3.1,11.6,158.5,3,180.3,0.7,10.5,4.7,190,0.9,115.7,24,35.8,70.5,7.58,32.1,5.56,0.99,4.21,0.64,4.06,0.77,2.1,0.35,2.1,0.33,1.97,1.11,5.9,31.2,11.5,105,61.6,11.1,0.2,0.1,0.1,<0.1,<0.5,0.04,0.5,1.2,,70.9,0.7,2.1,0.25,0.33,439,478,0.11,0.25,0.98,0.73,210,11,34,0.5
"Gal and Pyle, 2012, NWT OR 2012 009",well,Bear Rock O-20,300O206500125450,96C,64.996488,-125.7920596,Imperial,Mirror Lake,rock chips,65,"BEAR ROCK O-20-65			",,55.83,19.06,6.7,2.24,0.63,0.48,3.39,0.74,0.07,0.04,0.016,74,18,10.5,99.66,1727,,5,19.6,10.3,23.2,2.8,10.1,166.1,4,170.1,0.9,10.2,4.1,226,0.9,113.6,21.7,36.3,71.2,7.97,27.9,5.04,1.04,4.21,0.62,3.81,0.79,2.13,0.33,2.07,0.35,1.5,1.37,5.5,34,11.3,147,69,14,0.3,0.2,0.2,<0.1,<0.5,0.03,0.7,1.7,,70.4,0.58,1.3,0.3,0.28,434,473,0.05,0.17,0.75,0.58,176,7,37,0.8
"Gal and Pyle, 2012, NWT OR 2012 009",well,Bear Rock O-20,300O206500125450,96C,64.996488,-125.7920596,Imperial,Mirror Lake,rock chips,70,"BEAR ROCK O-20-70			",,55.83,19.71,6.46,2.01,0.38,0.43,3.37,0.71,0.07,0.03,0.015,83,19,10.7,99.68,1694,,2,19.1,10.4,23.2,2.8,9.2,164,3,170.3,0.9,11,3.8,181,0.8,101.4,22.2,34.1,63.5,7.48,27.7,5.33,0.97,4.16,0.59,3.56,0.7,1.89,0.32,1.89,0.31,1.43,1.49,5.6,38,11.9,162,72.6,13.7,0.2,<0.1,0.2,<0.1,<0.5,0.03,0.7,1.6,,70,0.6,1.9,0.24,0.27,438,477,0.1,0.22,0.85,0.63,221,12,32,0.6
"Gal and Pyle, 2012, NWT OR 2012 009",well,Bear Rock O-20,300O206500125450,96C,64.996488,-125.7920596,Imperial,Mirror Lake,rock chips,75,"BEAR ROCK O-20-75			",,54.73,19.19,6.56,2.45,1.25,0.42,3.36,0.69,0.09,0.04,0.015,79,18,10.9,99.66,1723,,2,17.9,10.6,21.1,2.8,10.5,163.3,2,180.3,1,10.7,4.6,185,1.4,99.7,21.6,33.9,68.6,7.7,24.6,5.17,1.02,4.02,0.61,3.41,0.7,2.17,0.32,2.12,0.34,1.89,1.53,8.3,34.7,10.9,128,69.1,14.4,0.3,0.1,0.1,<0.1,<0.5,0.05,0.6,1.6,,70.6,0.76,2.2,0.25,0.29,438,477,0.17,0.27,1.01,0.74,221,17,29,0.6
"Gal and Pyle, 2012, NWT OR 2012 009",well,Bear Rock O-20,300O206500125450,96C,64.996488,-125.7920596,Imperial,Mirror Lake,rock chips,80,"BEAR ROCK O-20-80			",,57.82,18.18,5.78,1.87,0.56,0.4,3.12,0.64,0.08,0.03,0.014,98,17,11.1,99.56,2643,,6,19.3,8.9,20.9,2.4,8.8,149.7,3,200.6,0.7,9.7,5.4,222,0.9,94.5,20.7,31.1,63.1,7.17,27.1,4.54,0.96,3.81,0.56,3.44,0.76,2.13,0.34,1.88,0.34,2.26,1.59,14,42.2,11.5,133,81.4,16.1,0.5,0.2,0.2,0.1,<0.5,0.05,0.6,2.8,,70.3,0.73,3.6,0.17,0.33,440,479,0.2,0.39,1.42,1.03,253,14,23,0.7
"Gal and Pyle, 2012, NWT OR 2012 009",well,Bear Rock O-20,300O206500125450,96C,64.996488,-125.7920596,Imperial,Mirror Lake,rock chips,85,"BEAR ROCK O-20-85			",,57.71,17.56,6.21,1.97,0.54,0.36,2.95,0.61,0.08,0.03,0.013,88,17,11.5,99.58,2431,,2,18.7,8.5,20.8,3,8.2,147,3,179.5,0.8,9.3,6.6,233,1.6,91.1,19.8,30.7,58.8,6.71,23.5,4.96,0.96,3.92,0.59,3.56,0.69,1.95,0.31,1.85,0.3,2.65,1.44,17.7,46.9,11.8,161,83.3,14.4,0.4,0.2,0.1,0.2,<0.5,0.06,0.6,3.2,,70.6,1.12,5.2,0.18,0.32,441,480,0.04,0.54,2.03,1.49,256,2,16,0.8
"Gal and Pyle, 2012, NWT OR 2012 009",well,Bear Rock O-20,300O206500125450,96C,64.996488,-125.7920596,Imperial,Mirror Lake,rock chips,90,"BEAR ROCK O-20-90			",,59.59,16.24,5.83,1.99,0.81,0.33,2.79,0.57,0.08,0.03,0.014,89,15,11.2,99.52,2881,,<1,15.3,8.4,19.2,2.5,8.3,137.5,3,171.7,0.7,8.7,5.9,302,0.9,85.6,22.4,29.2,55.4,6.51,26.3,4.57,0.92,3.81,0.58,3.11,0.75,1.82,0.29,1.78,0.32,2.75,1.59,15,38.8,10.4,220,78.2,24.4,1,0.5,0.1,0.2,<0.5,0.05,0.6,3.9,,70,0.9,4.6,0.16,0.33,440,479,0,0.47,1.71,1.24,268,0,19,0.8
"Gal and Pyle, 2012, NWT OR 2012 009",well,Bear Rock O-20,300O206500125450,96C,64.996488,-125.7920596,Canol,Dodo Canyon,rock chips,95,"BEAR ROCK O-20-95			",,64.12,14.3,4.61,1.56,0.71,0.28,2.52,0.5,0.07,0.02,0.012,107,13,10.8,99.47,3358,,10,13.7,7.9,17.2,1.8,7.4,125.9,2,184.5,0.6,7.6,8.2,380,0.9,75.2,21.4,28,50.6,5.96,24.8,4.12,0.87,3.42,0.51,3.47,0.58,1.89,0.31,1.84,0.32,3.36,2.03,24.9,42.7,10.3,236,92.9,17.7,1.2,0.6,0.1,0.2,<0.5,0.08,0.8,5.2,,70.4,1.68,8.9,0.16,0.3,442,481,0.18,0.9,2.87,1.97,308,6,10,0.6
"Gal and Pyle, 2012, NWT OR 2012 009",well,Bear Rock O-20,300O206500125450,96C,64.996488,-125.7920596,Canol,Dodo Canyon,rock chips,100,"BEAR ROCK O-20-100			",,63.79,12.43,4.84,1.56,1.25,0.3,2.29,0.49,0.08,0.02,0.013,122,12,12.5,99.58,2302,,1,15.8,7.1,15.5,2.4,7.6,110.5,2,234.1,0.4,7.5,15.5,406,1.3,84.7,24.8,28.7,53.5,6.57,26.3,5.06,0.96,4.32,0.62,4.1,0.75,1.85,0.32,1.79,0.31,5.01,2.67,40.7,52.7,10.6,229,109.1,20.1,1.5,0.9,0.1,0.3,<0.5,0.14,0.7,6,,70.3,1.84,12.8,0.13,0.37,440,479,0.06,1.23,4.16,2.93,307,1,9,0.7
"Gal and Pyle, 2012, NWT OR 2012 009",well,Bear Rock O-20,300O206500125450,96C,64.996488,-125.7920596,Canol,Dodo Canyon,rock chips,105,"BEAR ROCK O-20-105			",,67.01,11.49,3.96,1.55,1.25,0.28,2.13,0.4,0.07,0.02,0.011,119,11,11.4,99.56,2511,,3,14.4,6.5,13.4,2,7.3,102.9,1,243,0.5,7,13.3,402,0.5,65.7,23.1,24.6,45.6,5.77,20.4,4.22,0.84,3.77,0.56,3.53,0.67,1.93,0.29,1.71,0.28,4.66,2.18,42.3,49.9,10.7,219,102.9,19.3,1.3,0.6,0.1,0.3,<0.5,0.12,0.5,5.9,,70.9,2.23,12.8,0.15,0.36,441,480,0.02,1.26,3.84,2.58,333,1,9,0.6
"Gal and Pyle, 2012, NWT OR 2012 009",well,Bear Rock O-20,300O206500125450,96C,64.996488,-125.7920596,Canol,Dodo Canyon,rock chips,110,"BEAR ROCK O-20-110			",,53.77,3.39,1.64,0.98,19.09,0.17,0.68,0.15,0.06,<0.01,0.003,87,4,19.4,99.39,4494,,3,6.4,1.5,3.8,0.9,3.4,28,<1,200.3,0.2,2.4,10.9,253,<0.5,29.6,11.9,11.9,19.5,2.85,12,2.23,0.5,1.97,0.25,1.85,0.35,0.77,0.15,0.78,0.14,7.82,1.29,37.6,24.1,4.2,126,60.5,10.1,0.9,1.2,<0.1,0.2,<0.5,0.12,0.4,3.9,,70.9,1.16,8.5,0.12,0.38,434,473,0.09,0.82,2.53,1.71,334,4,15,6.6
"Gal and Pyle, 2012, NWT OR 2012 009",well,Bear Rock O-20,300O206500125450,96C,64.996488,-125.7920596,Canol,Dodo Canyon,rock chips,115,"BEAR ROCK O-20-115			",,66.09,3.87,1.95,0.77,10.64,0.19,0.73,0.19,0.07,0.01,0.005,97,4,15.1,99.57,2846,,2,9,1.6,5.7,1.2,3.9,30.8,<1,219.8,0.3,2.8,18.8,276,0.6,39.1,21.4,15.2,26.2,3.67,12.6,3.26,0.64,2.84,0.44,2.45,0.51,1.4,0.22,1.25,0.19,7.62,1.56,58.5,35.2,5.7,165,81.5,14.6,1.2,1.3,<0.1,0.3,<0.5,0.18,0.4,5.6,,70.1,2.59,21,0.11,0.29,434,473,0.07,1.98,5.82,3.84,362,1,5,1.2
"Gal and Pyle, 2012, NWT OR 2012 009",well,Bear Rock O-20,300O206500125450,96C,64.996488,-125.7920596,Canol,Dodo Canyon,rock chips,120,"BEAR ROCK O-20-120			",,75.86,6.48,2.52,0.64,1.78,0.31,1.27,0.34,0.07,<0.01,0.008,139,7,10,99.29,4662,,3,11.9,2.9,7.5,1.9,6,52.8,<1,242.5,0.4,4.7,15.7,656,0.5,72,19.7,22.2,38.5,5.02,20.2,3.68,0.73,2.93,0.47,2.68,0.58,1.51,0.27,1.51,0.24,5.62,1.94,57.8,51.1,8.7,313,110.3,19.1,2.3,2.3,0.2,0.4,<0.5,0.21,0.4,7.2,,70.6,2.86,16.9,0.14,0.3,435,474,0.15,1.66,4.63,2.97,365,3,6,0.3
"Gal and Pyle, 2012, NWT OR 2012 009",well,Bear Rock O-20,300O206500125450,96C,64.996488,-125.7920596,Canol,Dodo Canyon,rock chips,125,"BEAR ROCK O-20-125			",,72.66,7.06,2.82,1.08,3.11,0.34,1.41,0.32,0.07,0.02,0.008,119,7,10.5,99.4,3768,,1,11.5,3.1,8.8,1.7,6.1,59.3,1,280.2,0.4,5.2,14.3,536,0.9,62.2,25.3,21.6,37.3,4.96,16.8,3.7,0.79,3.42,0.56,3.53,0.65,1.94,0.3,1.71,0.27,5.61,1.72,51.3,47,8.4,247,91.9,15.9,1.6,1.6,0.1,0.3,<0.5,0.15,0.3,6.6,,70.9,2.85,15.6,0.15,0.31,436,475,0.2,1.55,4.51,2.96,345,4,7,0.6
"Gal and Pyle, 2012, NWT OR 2012 009",well,Bear Rock O-20,300O206500125450,96C,64.996488,-125.7920596,Canol,Dodo Canyon,rock chips,130,"BEAR ROCK O-20-130			",,78.82,5.7,2.35,0.59,0.91,0.29,1.04,0.25,0.07,<0.01,0.007,103,6,9.4,99.41,4325,,1,10.4,2.4,6.7,1.1,4.2,46.3,<1,245.3,0.3,3.7,14.2,313,0.9,44.4,23.1,17.6,31.1,4.02,16.9,3.25,0.73,3.03,0.45,2.67,0.56,1.66,0.23,1.46,0.21,5.59,1.62,57.4,48.8,8.4,212,90.6,14.7,1.6,1.5,0.1,0.3,<0.5,0.17,0.2,6.2,,70.9,3.84,19.7,0.16,0.34,430,469,0.02,1.96,5.25,3.29,374,0,6,0.2
"Gal and Pyle, 2012, NWT OR 2012 009",well,Bear Rock O-20,300O206500125450,96C,64.996488,-125.7920596,Canol,Vermillion Creek,rock chips,135,"BEAR ROCK O-20-135			",,64.62,9.79,5.09,1.83,2.85,0.47,1.94,0.48,0.09,0.03,0.008,84,11,11.8,98.96,7932,,<1,25.1,3.9,11.7,3,8.1,73.9,2,404.1,0.7,8.1,12.2,166,0.8,102.8,26.1,27.7,61,6.8,28.4,5.22,1.07,4.98,0.7,4.36,0.9,2.22,0.34,1.99,0.32,4.75,3.49,28.9,57,15.7,134,76.9,21.1,1.1,0.8,0.2,0.4,<0.5,0.32,0.4,4.8,,70.3,2.35,11.5,0.17,0.32,439,478,0.08,1.16,3.51,2.35,326,2,9,1.1
"Gal and Pyle, 2012, NWT OR 2012 009",well,Bear Rock O-20,300O206500125450,96C,64.996488,-125.7920596,Canol,Vermillion Creek,rock chips,140,"BEAR ROCK O-20-140			",,63.27,10.11,5.5,1.84,2.88,0.46,2.04,0.52,0.09,0.03,0.009,119,11,12.1,98.89,8514,,1,31.8,4.6,12,2.9,8.5,77.2,2,409.8,0.8,8.5,12.9,183,1,112.6,25.4,31.7,64.6,7.26,27.9,5.24,1.03,4.61,0.71,3.5,0.86,2.14,0.34,1.9,0.33,4.98,3.85,30.7,64.9,18.3,161,104.3,24.6,1.5,1,0.2,0.4,<0.5,0.36,0.5,7.3,,70.1,1.96,11.1,0.15,0.38,439,478,0.25,1.11,3.56,2.45,312,7,11,1
"Gal and Pyle, 2012, NWT OR 2012 009",well,Bear Rock O-20,300O206500125450,96C,64.996488,-125.7920596,Canol,Vermillion Creek,rock chips,145,"BEAR ROCK O-20-145			",,63.13,9.75,5.52,1.45,2.4,0.6,2.02,0.47,0.1,0.03,0.009,144,10,13,98.5,12047,,3,31.5,4,11,2.6,9.6,75.2,2,407.1,0.6,7.6,17.9,194,17.3,86.2,24.5,28.4,54.5,6.3,25.7,4.66,0.89,4.36,0.63,3.55,0.78,2.07,0.29,1.97,0.29,6.22,3.84,45,81.5,19.2,168,92.1,22.3,2.4,1.9,0.3,0.4,<0.5,0.32,0.6,6.7,,70.6,2.16,15.6,0.12,0.32,439,478,0.22,1.5,5.26,3.76,296,4,6,1.1
"Gal and Pyle, 2012, NWT OR 2012 009",well,Bear Rock O-20,300O206500125450,96C,64.996488,-125.7920596,Canol,Vermillion Creek,rock chips,150,"BEAR ROCK O-20-150			",,64.2,8.58,4.62,1.31,3.59,0.53,1.7,0.42,0.08,0.02,0.009,128,9,12.9,97.95,16833,,<1,27.9,3.6,9.7,2.4,7.6,65.2,1,531.1,0.5,6.4,16.3,207,1.7,81.5,22.1,27.7,53.7,6.17,23.5,4.69,0.89,4.5,0.61,3.31,0.73,2.05,0.31,1.66,0.28,6.48,3.5,38.5,71.5,16.4,171,111.2,20.7,2.3,1.6,0.3,0.4,<0.5,0.32,0.4,6.6,,70.7,2.33,16.5,0.12,0.3,437,476,0.1,1.58,5.19,3.61,318,2,6,1
"Gal and Pyle, 2012, NWT OR 2012 009",well,Bear Rock O-20,300O206500125450,96C,64.996488,-125.7920596,Canol,Vermillion Creek,rock chips,155,"BEAR ROCK O-20-155			",,68.65,7.02,3.49,0.72,1.5,0.48,1.37,0.33,0.09,0.02,0.009,131,7,13,96.7,28033,,1,22.6,2.9,8.5,1.4,6.6,54,1,599.8,0.5,4.9,24.8,211,1.6,63.8,25.6,23.5,42.9,5.41,21.4,3.99,0.97,4.37,0.6,3.3,0.71,2.07,0.29,1.65,0.29,7.49,3.07,66.9,76.9,14.7,185,107.3,19.8,2.3,1.9,0.2,0.3,<0.5,0.29,0.3,7.5,,69.9,3.15,22.6,0.12,0.32,434,473,0.09,2.15,7.12,4.97,317,1,4,0.6
"Gal and Pyle, 2012, NWT OR 2012 009",well,Bear Rock O-20,300O206500125450,96C,64.996488,-125.7920596,Canol,Vermillion Creek,rock chips,160,"BEAR ROCK O-20-160			",,55.67,6.85,4.87,0.83,3.17,0.48,1.45,0.33,0.07,0.01,0.009,83,7,15.3,89.07,17946,,<1,21.9,2.8,7.8,1.9,9.1,59.7,1,455.3,0.3,4.4,18.4,152,3.7,72.4,22.1,20.9,38.8,5,20.2,3.74,0.95,4.36,0.56,3.16,0.66,1.47,0.27,1.42,0.24,8.19,4.4,49.2,75.1,13.7,148,91.4,23.6,1.9,1.5,0.2,0.3,<0.5,0.29,0.3,8,,70,2.62,21.1,0.11,0.27,438,477,0.22,1.99,7.18,5.19,294,3,4,0.7
"Gal and Pyle, 2012, NWT OR 2012 009",well,Bear Rock O-20,300O206500125450,96C,64.996488,-125.7920596,Canol,Vermillion Creek,rock chips,165,"BEAR ROCK O-20-165			",,57.22,8.09,3.77,1.86,6.58,0.56,1.65,0.41,0.11,0.03,0.01,96,9,16.7,96.99,25300,,4,23.7,3.4,10.1,1.9,7.8,61.9,2,710.4,0.5,6,18.2,161,2.2,74.6,24.6,28.6,52.6,6.18,27.2,4.76,0.88,4.9,0.69,4.28,0.77,2.18,0.32,1.68,0.3,8.92,3.3,41.5,71.2,14.4,122,75.5,15.8,1.9,1.3,0.3,0.3,<0.5,0.3,0.2,6.6,,70.9,2.55,18.2,0.12,0.4,440,479,0.26,1.75,6.8,5.05,267,4,6,1.8
"Gal and Pyle, 2012, NWT OR 2012 009",well,Bear Rock O-20,300O206500125450,96C,64.996488,-125.7920596,Canol,Vermillion Creek,rock chips,170,"BEAR ROCK O-20-170			",,60.68,7.76,3.33,1.76,6.03,0.49,1.59,0.39,0.12,0.03,0.007,100,8,15.7,97.89,17460,,2,18.5,3.9,10.1,2.5,6.9,65.2,2,688.7,0.9,6.1,19.1,202,1.4,77.6,27.5,26.5,46.3,5.75,20.9,4.38,1.84,4.52,0.65,3.51,0.8,2.21,0.32,1.72,0.29,8.89,2.74,49.3,70.1,13.3,135,79.6,13.7,2.2,1.4,0.2,0.3,1.1,0.28,<0.1,6.5,,70.1,2.53,20.8,0.11,0.35,437,476,0.14,1.96,6.98,5.02,298,2,5,1
"Gal and Pyle, 2012, NWT OR 2012 009",well,Bear Rock O-20,300O206500125450,96C,64.996488,-125.7920596,Hare Indian,Prohibition Creek,rock chips,175,"BEAR ROCK O-20-175			",,69.16,7.17,2.52,1.37,3.92,0.31,1.33,0.3,0.08,0.02,0.008,115,7,12.3,98.53,11759,,1,10.6,3.6,8.5,1.8,4.8,60,1,542.4,0.6,4.3,12,286,0.9,55.1,21.7,21.6,33.6,4.54,16.9,3.13,0.86,3.21,0.49,2.85,0.59,1.67,0.24,1.54,0.24,5.88,1.97,36.4,45.3,8.7,176,89.7,10.4,2.2,1.1,0.1,0.3,<0.5,0.13,0.1,5.3,,70.5,2.16,15.1,0.12,0.25,438,477,0.1,1.45,4.8,3.35,315,2,5,0.8
"Gal and Pyle, 2012, NWT OR 2012 009",well,Bear Rock O-20,300O206500125450,96C,64.996488,-125.7920596,Hare Indian,Prohibition Creek,rock chips,180,"BEAR ROCK O-20-180			",,71.05,7.37,2.09,1.03,3.13,0.28,1.33,0.3,0.09,0.01,0.011,133,7,12.4,99.08,6995,,<1,11.9,3.9,9.4,1.4,5.8,66.7,1,427,0.6,4.7,14.3,292,0.6,54.4,23,21.5,33,4.8,17.2,3.53,0.91,3.4,0.51,3,0.64,1.79,0.26,1.64,0.27,7.09,1.5,46.2,50.1,8.9,238,103.4,9.3,3,1.3,<0.1,0.3,1.6,0.15,0.1,6.2,,70.5,2.57,20,0.11,0.24,438,477,0.05,1.88,6.15,4.27,324,1,4,0.7
"Gal and Pyle, 2012, NWT OR 2012 009",well,Bear Rock O-20,300O206500125450,96C,64.996488,-125.7920596,Hare Indian,Prohibition Creek,rock chips,185,"BEAR ROCK O-20-185			",,64.05,8.22,3.98,1.72,6.01,0.21,1.47,0.29,0.07,0.02,0.008,109,8,13.5,99.53,2948,,<1,9.8,4.8,10,1.4,5.7,74.7,<1,484.8,0.4,4.7,9.7,209,1,44,21.4,20.5,32.2,4.29,16.3,2.97,0.63,2.9,0.45,2.64,0.54,1.56,0.24,1.57,0.23,6.29,2.71,32.3,31.6,6.4,182,86.5,23.6,1.6,1.2,<0.1,0.2,0.9,0.22,0.1,3.9,,70.8,2.08,13.6,0.13,0.28,443,482,0.06,1.32,4.54,3.22,300,1,6,1.1
"Gal and Pyle, 2012, NWT OR 2012 009",well,Bear Rock O-20,300O206500125450,96C,64.996488,-125.7920596,Hare Indian,Prohibition Creek,rock chips,190,"BEAR ROCK O-20-190			",,66.01,8.64,2.65,1.18,5.39,0.24,1.56,0.31,0.09,0.02,0.011,116,8,12.6,98.72,10221,,2,9.8,4.8,10.3,1.4,6,79.9,2,559.9,0.6,5,9.6,223,1.3,47.2,23.5,24.6,35.1,4.83,19.8,3.31,0.79,3.24,0.49,2.86,0.66,1.77,0.26,1.56,0.26,6.17,1.73,34.6,37.6,5.9,208,92.6,11.2,1.8,0.5,<0.1,0.2,1,0.11,0.1,3.9,,70.4,1.85,13.1,0.12,0.31,444,483,0.07,1.25,4.33,3.08,302,2,7,1.4
"Gal and Pyle, 2012, NWT OR 2012 009",well,Bear Rock O-20,300O206500125450,96C,64.996488,-125.7920596,Hare Indian,Prohibition Creek,rock chips,195,"BEAR ROCK O-20-195			",,61.01,9.83,3.68,1.82,6.08,0.28,1.83,0.37,0.09,0.02,0.012,133,9,13.8,98.85,8842,,3,11.3,5,11,1.7,6.8,86.8,1,472.4,0.6,5.6,11.2,231,1.9,54.6,22.1,24.7,39,5.08,19,3.43,0.67,3.24,0.52,3.13,0.64,1.87,0.28,1.54,0.26,6.43,2.18,46.4,38.4,8.1,219,98.5,17.2,1.8,0.6,<0.1,0.2,1.3,0.18,0.2,5.1,,70.9,2.18,13.5,0.14,0.28,441,480,0.04,1.31,4.45,3.14,302,1,6,1.8
"Gal and Pyle, 2012, NWT OR 2012 009",well,Bear Rock O-20,300O206500125450,96C,64.996488,-125.7920596,Hare Indian,Prohibition Creek,rock chips,200,"BEAR ROCK O-20-200			",,60.83,12.01,4.92,1.56,3.91,0.25,2.13,0.48,0.08,0.02,0.012,141,11,12.8,99.02,7402,,<1,13.4,6.9,14.1,2.2,8.1,115.5,2,391,0.6,7.8,10.4,296,1.2,72.2,24.9,30.8,49.1,6.32,26.2,4.45,1.07,3.87,0.57,3.44,0.77,2.14,0.34,1.98,0.31,5.29,2.86,51.9,38.4,10.8,219,117.2,25.6,1.6,0.6,0.1,0.2,0.8,0.14,0.4,6.6,,70.3,2.08,10.9,0.16,0.26,445,484,0.07,1.09,3.67,2.58,296,2,7,1
"Gal and Pyle, 2012, NWT OR 2012 009",well,Bear Rock O-20,300O206500125450,96C,64.996488,-125.7920596,Hare Indian,Francis Creek ,rock chips,205,"BEAR ROCK O-20-205			",,55.46,16.29,5.49,2.13,3.46,0.13,2.67,0.61,0.07,0.02,0.015,121,15,13.3,99.66,1566,,2,16.5,9.6,19.9,2.9,10.7,156.8,2,275.9,0.6,10.2,7.4,338,1.1,86.6,25.7,36.6,63.7,7.53,27.6,4.9,0.99,4.28,0.64,3.95,0.75,2.07,0.34,2.21,0.34,4.01,2.24,34.3,29.8,12.7,214,111.9,20.6,1.6,0.4,0.1,0.2,1.2,0.1,1,5.9,,70.6,1.41,6.1,0.19,0.32,443,482,0.06,0.64,2.3,1.66,266,3,14,1
"Gal and Pyle, 2012, NWT OR 2012 009",well,Bear Rock O-20,300O206500125450,96C,64.996488,-125.7920596,Hare Indian,Francis Creek ,rock chips,210,"BEAR ROCK O-20-210			",,52.31,16.33,5.98,2.61,3.95,0.12,2.65,0.61,0.06,0.03,0.016,135,14,15,99.66,1284,,<1,16.4,9.7,20.1,2.4,10.9,151.6,3,268.4,0.8,9.8,7.4,360,1.3,85.1,24,35.1,59.2,7.19,26.5,4.48,0.95,3.88,0.63,3.41,0.77,2.19,0.36,2.15,0.32,4.61,2.85,28.4,32.7,13.3,327,111.6,20.7,4.1,1,0.1,0.4,1,0.11,0.6,6.7,,70.6,0.93,7.1,0.12,0.63,445,484,0.04,0.69,2.82,2.13,252,1,22,1.6
"Gal and Pyle, 2012, NWT OR 2012 009",well,Bear Rock O-20,300O206500125450,96C,64.996488,-125.7920596,Hare Indian,Francis Creek ,rock chips,215,"BEAR ROCK O-20-215			",,50.58,12.17,4.68,2.63,8.82,0.19,2.21,0.49,0.08,0.03,0.014,179,11,17.8,99.67,1371,,1,12.4,7.3,14.4,2,9.4,120.3,2,366.9,0.7,7.8,13,269,2.1,82.6,27.2,32.5,49.6,6.82,25.9,4.53,0.95,4.33,0.64,3.64,0.83,2.36,0.37,2.11,0.36,7.34,2.92,52.6,39.6,10.1,280,148,24.7,3.4,1.5,0.1,0.4,<0.5,0.24,0.5,6.8,,70.4,1.36,12.7,0.1,0.34,444,483,0.18,1.19,4.49,3.3,284,4,8,2.7
"Gal and Pyle, 2012, NWT OR 2012 009",well,Bear Rock O-20,300O206500125450,96C,64.996488,-125.7920596,Hare Indian,Bluefish,rock chips,220,"BEAR ROCK O-20-220			",,64.29,9.19,4.47,1.07,3.99,0.16,1.81,0.4,0.09,0.01,0.013,215,9,14.2,99.68,1078,,<1,9.9,5.6,11.4,2,7.8,93.3,2,238.1,0.6,6.2,21.1,454,0.8,77.8,28.2,28.9,40.6,6.18,24.2,4.51,0.93,4.17,0.64,3.74,0.8,2.27,0.36,2.16,0.36,6.94,3.29,94.3,61.2,9.8,521,199.7,26.7,7,2.7,<0.1,0.6,<0.5,0.24,0.6,11.7,,70.9,2.01,16.3,0.11,0.3,438,477,0.03,1.53,5.37,3.84,303,1,6,1.2
"Gal and Pyle, 2012, NWT OR 2012 009",well,Bear Rock O-20,300O206500125450,96C,64.996488,-125.7920596,Hare Indian,Bluefish,rock chips,225,"BEAR ROCK O-20-225			",,55.24,6.92,2.58,0.73,13.98,0.1,1.35,0.32,0.08,0.01,0.011,189,7,18.4,99.73,676,,2,7.7,3.9,8.4,1.4,6.2,65.9,1,312,0.4,4.9,15.9,468,0.9,68.8,23.8,23.6,32.6,5.15,19.6,3.48,0.75,3.43,0.53,3.41,0.65,2.02,0.28,1.74,0.29,8.83,2.07,84.8,49.9,9.9,327,162.9,13.6,9,2.2,<0.1,0.3,0.5,0.24,0.5,14.4,,70.7,1.23,8,0.13,0.27,438,477,0.13,0.78,2.76,1.98,289,5,10,7.8
"Pyle and Gal, 2012, NWT OR 2012 008",outcrop,Bell Creek West,,106H,65.283447,-128.9787382,Hare Indian,Hare Indian,rock pulp,0 to 3,11BW-001,,54.74,12.75,5.67,1.77,9.59,0.58,2.12,0.82,0.08,0.07,0.012,32,13,11.6,99.77,369,,2,14.1,5.3,18.2,4.7,13.2,102.9,2,417,0.8,12.7,2.9,113,1.2,197.3,31.6,41.3,86.3,9.87,37,6.96,1.26,6.17,0.9,4.98,1.11,2.97,0.44,2.94,0.42,2.23,0.2,0.1,11.6,13.1,96,32.7,6.5,<0.1,<0.1,0.1,<0.1,<0.5,<0.01,<0.1,<0.5,,70.4,0.01,0.07,0.13,0.27,454,494,0.03,0.02,0.13,0.11,54,23,208,2.1
"Pyle and Gal, 2012, NWT OR 2012 008",outcrop,Bell Creek West,,106H,65.283447,-128.9787382,Hare Indian,Hare Indian,rock pulp,3 to 6,11BW-002,,55.61,13.47,5.19,1.81,8.67,0.52,2.21,0.84,0.07,0.06,0.011,43,13,11.4,99.82,302,,2,13.9,5.8,16.2,5,14.2,99.5,2,358.3,1,12.2,2.6,110,1.5,191.3,29.3,39.5,80.4,9.35,34.7,6.23,1.29,5.68,0.94,4.85,1.19,3.34,0.52,3.14,0.48,2.02,0.2,<0.1,13.6,13.5,122,35.1,5.8,<0.1,<0.1,0.1,<0.1,<0.5,<0.01,<0.1,<0.5,,70,0.01,0.07,0.14,0.16,455,495,0.01,0.01,0.11,0.1,64,9,145,1.9
"Pyle and Gal, 2012, NWT OR 2012 008",outcrop,Bell Creek West,,106H,65.283447,-128.9787382,Hare Indian,Hare Indian,rock pulp,6 to 9,11BW-003,,54.06,13.42,4.94,1.77,9.72,0.52,2.23,0.83,0.08,0.07,0.01,40,14,12.2,99.82,276,,4,13.8,5.5,16.4,5.4,14.4,102,2,384.4,1,12.2,2.7,110,1.3,183.7,31.1,41.2,84.6,9.59,32.3,6.61,1.36,5.59,0.96,5.31,1.2,3.32,0.51,2.88,0.48,2.22,0.13,<0.1,13.2,11.5,112,34.8,4.3,<0.1,<0.1,0.2,<0.1,<0.5,<0.01,<0.1,<0.5,,70.7,0,0.03,0.09,0.16,455,495,0.02,0.01,0.11,0.1,27,18,145,2
"Pyle and Gal, 2012, NWT OR 2012 008",outcrop,Bell Creek West,,106H,65.283447,-128.9787382,Hare Indian,Hare Indian,rock pulp,9 to 12,11BW-004,,52.79,13.28,5.39,1.73,9.99,0.46,2.21,0.82,0.08,0.07,0.014,37,13,13,99.82,390,,2,16.2,5.7,16.3,5.1,13.5,102.8,2,384,0.9,11.7,2.9,116,1.4,175.1,29.5,40.6,84.5,9.65,33.5,6.69,1.28,5.69,0.91,5.01,1.14,3.28,0.48,2.96,0.47,2.26,0.37,0.1,13.2,12.8,102,35.1,5.9,<0.1,<0.1,0.2,<0.1,<0.5,<0.01,<0.1,<0.5,,70,0.01,0.04,0.12,0.25,456,496,0,0.01,0.12,0.11,33,0,208,2
"Pyle and Gal, 2012, NWT OR 2012 008",outcrop,Bell Creek West,,106H,65.283447,-128.9787382,Hare Indian,Hare Indian,rock pulp,12 to 15,11BW-005,,52.65,14.08,6.14,1.81,8.6,0.44,2.35,0.84,0.08,0.07,0.012,41,14,12.7,99.82,396,,2,16.6,6.2,16.7,5.4,13.6,111.7,2,345.8,1,11.6,2.6,124,1.6,171.8,28.5,43.1,89.4,9.67,35.6,6.61,1.37,5.89,0.94,4.83,1.13,3.19,0.54,3.06,0.47,1.95,0.99,0.2,13.7,15.3,111,40.3,8.4,<0.1,<0.1,0.2,<0.1,<0.5,0.02,<0.1,<0.5,,70.4,0,0.04,0.12,0.19,450,490,0.01,0.01,0.11,0.1,36,9,173,1.8
"Pyle and Gal, 2012, NWT OR 2012 008",outcrop,Bell Creek West,,106H,65.283447,-128.9787382,Hare Indian,Hare Indian,rock pulp,15 to 18,11BW-006,,55.24,13.7,5.45,1.77,7.98,0.47,2.28,0.86,0.08,0.06,0.013,39,14,11.9,99.82,376,,3,15.4,6.3,16.1,4.9,13.4,105.5,2,356.3,1,11.7,2.9,118,1.9,189,29,40.6,83.7,9.4,35.5,6.16,1.25,5.51,0.94,5.07,1.14,3.26,0.5,2.94,0.51,1.85,0.46,0.2,14.5,15.3,112,36.5,6.6,<0.1,<0.1,0.2,<0.1,<0.5,0.01,<0.1,<0.5,,69.9,0.01,0.05,0.11,0.19,452,492,0,0.01,0.09,0.08,56,0,211,1.7
"Pyle and Gal, 2012, NWT OR 2012 008",outcrop,Bell Creek West,,106H,65.283447,-128.9787382,Hare Indian,Hare Indian,rock pulp,18 to 21,11BW-007,,53.34,15.1,6.06,1.88,7.03,0.4,2.49,0.89,0.1,0.06,0.012,46,15,12.4,99.81,418,,2,17.9,7.2,18.2,5.5,15.2,122.5,2,346.5,1,12.8,2.9,133,1.2,186.6,30.7,43.5,93.5,10.51,37,7.32,1.46,5.92,1.03,5.99,1.23,3.55,0.51,3.18,0.46,1.62,0.97,0.1,14.7,17.2,121,41.4,8.2,<0.1,<0.1,0.2,<0.1,<0.5,0.02,<0.1,<0.5,,70.7,0.01,0.04,0.12,0.16,452,492,0.02,0.01,0.07,0.06,57,29,229,1.5
"Pyle and Gal, 2012, NWT OR 2012 008",outcrop,Bell Creek West,,106H,65.283447,-128.9787382,Hare Indian,Hare Indian,rock pulp,21 to 24,11BW-008,,51.47,15.15,6.13,1.82,7.83,0.35,2.46,0.86,0.09,0.07,0.012,47,15,13.6,99.8,385,,5,18.3,8.1,18.2,4.6,14.6,119.5,3,361.1,1,12.2,2.7,137,1.5,164.6,28.1,43,88.4,9.84,37.4,6.56,1.42,5.61,0.93,5.02,1.12,3.22,0.47,2.94,0.45,1.78,1.13,0.5,15.9,22.6,112,42.7,10.2,<0.1,<0.1,0.2,<0.1,<0.5,0.02,<0.1,<0.5,,70.3,0,0.02,0.1,0.19,450,490,0.01,0.01,0.08,0.07,25,12,238,1.7
"Pyle and Gal, 2012, NWT OR 2012 008",outcrop,Bell Creek West,,106H,65.283447,-128.9787382,Hare Indian,Hare Indian,rock pulp,24 to 27,11BW-009,,51.78,17.36,6.33,1.97,6.1,0.3,2.84,0.88,0.08,0.07,0.014,56,16,12.1,99.8,420,,2,19,8.6,19.5,4.5,15.5,144.3,2,332.4,1,12.7,2.8,141,1.3,155.3,25.9,44,83.4,9.33,33.9,5.7,1.13,4.72,0.82,4.61,1,2.86,0.47,2.8,0.45,1.41,1.11,0.3,16,17.7,112,49.3,10,<0.1,<0.1,0.2,<0.1,<0.5,0.01,<0.1,<0.5,,70.1,0.01,0.04,0.14,0.2,447,487,0.01,0.01,0.08,0.07,50,12,250,1.3
"Pyle and Gal, 2012, NWT OR 2012 008",outcrop,Bell Creek West,,106H,65.283447,-128.9787382,Hare Indian,Hare Indian,rock pulp,27 to 30,11BW-010,,48.7,18.56,6.42,2.16,7.2,0.28,3.11,0.8,0.1,0.06,0.013,55,17,12.4,99.8,350,,4,19,9.7,22.2,3.1,12.9,163.3,3,324.7,0.9,12.3,2.8,149,1.1,122.7,24.9,40.6,78,9.07,31.2,5.83,1.13,4.95,0.83,4.03,1.05,2.67,0.44,2.75,0.42,1.62,1.08,0.2,20.7,15.4,105,47.9,8.4,<0.1,<0.1,0.1,<0.1,<0.5,0.02,<0.1,<0.5,,69.8,0.01,0.04,0.13,0.22,450,490,0,0.01,0.09,0.08,44,0,244,1.5
"Pyle and Gal, 2012, NWT OR 2012 008",outcrop,Bell Creek West,,106H,65.283447,-128.9787382,Hare Indian,Hare Indian,rock pulp,30 to 33,11BW-011,,24.87,7.97,3.66,1.56,31.51,0.27,1.46,0.39,0.06,0.08,0.008,<20,8,28,99.8,157,,4,8,3.2,11.5,2.1,9.4,68.4,1,688.2,0.4,5.6,1.3,36,1.1,64.9,15.6,20.6,39.5,4.98,19.4,3.62,0.75,3.44,0.48,2.86,0.54,1.67,0.25,1.38,0.22,7.18,0.43,<0.1,10.1,7.8,42,20.1,4.4,<0.1,<0.1,<0.1,<0.1,<0.5,<0.01,<0.1,<0.5,,70,0.01,0.04,0.14,0.29,448,488,0,0.01,0.13,0.12,31,0,223,7.1
"Pyle and Gal, 2012, NWT OR 2012 008",outcrop,Bell Creek West,,106H,65.283447,-128.9787382,Ramparts,Ramparts,rock pulp,52 to 55,11BW-012,,28.46,4.75,2.38,0.76,32.71,0.34,0.94,0.36,0.02,0.04,0.008,22,5,29,99.8,103,,3,4,1.4,6.9,4,8.2,37.5,<1,766.1,0.4,5.3,1.6,24,0.7,111.6,19.8,21.7,38.7,5.17,21.9,3.96,0.78,3.44,0.5,2.89,0.57,1.81,0.23,1.6,0.17,9.02,0.54,1,4.3,7,25,13.4,3.7,<0.1,<0.1,<0.1,<0.1,<0.5,<0.01,<0.1,<0.5,,70.8,1.07,3.18,0.25,0.37,455,495,0.07,0.37,1.89,1.52,168,4,20,7.3
"Pyle and Gal, 2012, NWT OR 2012 008",outcrop,Bell Creek West,,106H,65.283447,-128.9787382,Ramparts,Ramparts,rock pulp,55 to 58,11BW-013,,41.95,6.32,2.33,0.73,25.15,0.44,1.17,0.49,0.03,0.03,0.011,<20,6,21.2,99.82,440,,2,4.8,2.6,7.8,5.2,8.2,49.8,<1,697.4,0.5,8.9,2.5,47,0.9,188,27.1,35.7,62.4,7.79,26.8,5.72,1.01,4.69,0.68,4.13,0.82,2.28,0.36,2.01,0.32,5.66,0.63,0.3,4.2,7.5,40,13.8,4.2,<0.1,<0.1,<0.1,<0.1,<0.5,<0.01,<0.1,<0.5,,70.4,0.02,0.16,0.13,0.33,449,488,0.01,0.02,0.25,0.23,64,4,132,5.6
"Pyle and Gal, 2012, NWT OR 2012 008",outcrop,Bell Creek West,,106H,65.283447,-128.9787382,Ramparts,Ramparts,rock pulp,58 to 61,11BW-014,,68.65,5.42,2.2,0.36,8.44,0.43,0.81,0.55,0.03,0.02,0.011,<20,5,13,99.88,198,,2,3.8,1.6,6.1,12,10.4,32.9,<1,252.4,0.7,11.6,2.9,38,0.9,426.3,25.4,40.9,80.9,9.48,33.2,6.05,1.05,4.88,0.83,4.59,1.04,2.86,0.46,2.86,0.47,6.31,0.97,1.1,2.6,7.1,20,7.8,5,<0.1,<0.1,<0.1,<0.1,<0.5,<0.01,<0.1,<0.5,,70.9,1.26,8.72,0.13,0.42,452,491,0.2,0.86,4.62,3.76,189,4,9,1.8
"Pyle and Gal, 2012, NWT OR 2012 008",outcrop,Bell Creek West,,106H,65.283447,-128.9787382,Ramparts,Ramparts,rock pulp,61 to 64,11BW-015,,45.86,4.29,1.67,0.51,22.4,0.3,0.88,0.44,0.02,0.02,0.011,<20,4,23.5,99.85,219,,1,2.7,1.6,4.6,6.9,6.7,36.7,<1,511.8,0.6,8,2.5,33,1.2,264.4,22.5,32.1,53.9,6.69,22.9,4.64,0.86,3.92,0.63,3.28,0.79,2.27,0.35,2.12,0.35,8.23,0.12,1.3,3.6,6.5,18,8.4,3.7,<0.1,<0.1,<0.1,<0.1,<0.5,<0.01,<0.1,<0.5,,70.4,0.35,5.28,0.06,0.45,451,490,0.16,0.49,3.23,2.74,163,5,14,5.2
"Pyle and Gal, 2012, NWT OR 2012 008",outcrop,Bell Creek West,,106H,65.283447,-128.9787382,Ramparts,Ramparts,rock pulp,64 to 67,11BW-016,,34.93,2.59,1,0.56,31.72,0.19,0.45,0.26,0.02,0.01,0.005,<20,2,28.1,99.87,167,,<1,1.2,0.6,3.1,5.3,4,19.2,<1,522.4,0.2,4.6,1.6,21,<0.5,167.3,18,22.5,34.7,4.81,20,3.44,0.6,2.95,0.41,2.32,0.46,1.46,0.24,1.47,0.23,8.6,0.32,0.5,2,3.8,8,4.7,1.7,<0.1,<0.1,<0.1,<0.1,<0.5,<0.01,<0.1,<0.5,,70.7,0.25,2.86,0.08,0.3,455,494,0.01,0.27,1.75,1.48,163,1,17,7.4
"Gal and Pyle, 2012, NWT OR 2012 009",well,Bluefish K-71,300K716500125450,96C,64.841784,-125.9936773,Imperial,Loon Creek,rock chips,1137.195122,"BLUEFISH K-71-3730			",,62.08,15.55,6.48,2.06,0.85,0.8,2.62,0.75,0.13,0.06,0.015,83,17,8.2,99.6,2209,,3,18.3,7.4,18.1,3.9,10.3,123,2,139.8,0.6,9.5,5.8,277,1.3,126.4,25.1,31.7,63.7,7.51,26.1,5.29,1.09,4.66,0.77,3.97,0.88,2.6,0.42,2.49,0.39,1.96,1.21,9.1,58.4,15.4,176,72.9,19,1.1,0.5,0.2,0.2,<0.5,0.16,0.5,2.1,,70.7,0.68,2,0.26,0.43,432,471,0.07,0.24,1.7,1.46,115,4,25,0.6
"Gal and Pyle, 2012, NWT OR 2012 009",well,Bluefish K-71,300K716500125450,96C,64.841784,-125.9936773,Imperial,Loon Creek,rock chips,1140.243902,"BLUEFISH K-71-3740			",,59.94,16.87,6.5,2.14,0.78,0.79,2.8,0.78,0.13,0.06,0.016,87,18,8.7,99.46,3493,,2,19.3,8.2,18.7,3.9,11.8,129.4,2,146.8,0.9,10.4,5.5,238,0.9,131.3,25.8,34.7,68.9,7.55,31,5.16,1.08,4.78,0.73,4.29,0.85,2.58,0.38,2.52,0.38,1.75,1.24,7.5,54.1,14.6,159,71,15.6,0.8,0.3,0.2,0.1,<0.5,0.18,0.4,1.4,,70.4,0.81,2.6,0.24,0.33,444,483,0.07,0.3,1.48,1.18,172,5,22,0.4
"Gal and Pyle, 2012, NWT OR 2012 009",well,Bluefish K-71,300K716500125450,96C,64.841784,-125.9936773,Imperial,Loon Creek,rock chips,1143.292683,"BLUEFISH K-71-3750			",,60.85,16.15,6.23,2.15,1.05,0.81,2.74,0.77,0.12,0.05,0.016,88,18,8.7,99.62,2061,,3,18.5,7.5,19.1,3.4,11.3,129.8,2,147.9,0.8,10.2,6.3,282,1.2,129.1,25.2,33,63.9,7.62,28.6,5.14,1.09,4.72,0.74,4.18,0.84,2.81,0.41,2.61,0.42,2.04,1.42,9.5,59.3,15.8,170,78.7,18.5,1.1,0.5,0.2,0.2,0.7,0.2,0.6,2.4,,70.5,0.86,3.1,0.22,0.28,443,482,0.04,0.34,1.69,1.35,182,2,17,0.4
"Gal and Pyle, 2012, NWT OR 2012 009",well,Bluefish K-71,300K716500125450,96C,64.841784,-125.9936773,Imperial,Loon Creek,rock chips,1161.585366,"BLUEFISH K-71-3810			",,61.15,15.04,6.29,2.09,1.37,0.64,2.58,0.7,0.13,0.06,0.015,92,16,9.4,99.47,3259,,<1,17.1,6.9,17.4,4.3,10.7,118.4,2,146.8,0.8,9.4,8.1,335,1.1,121.3,27.9,33.1,63,7.45,28.9,5.27,1.15,4.84,0.8,4.05,0.86,2.58,0.39,2.67,0.36,2.62,1.34,14.9,54.5,13.7,178,78.3,36.1,1,0.7,0.1,0.2,<0.5,0.25,0.5,3.7,,70.2,0.83,2.8,0.23,0.32,446,485,0.07,0.32,1.83,1.51,155,4,17,0.5
"Gal and Pyle, 2012, NWT OR 2012 009",well,Bluefish K-71,300K716500125450,96C,64.841784,-125.9936773,Imperial,Mirror Lake,rock chips,1176.829268,"BLUEFISH K-71-3860			",,58.27,17.39,7.14,2.21,0.93,0.71,3.02,0.76,0.13,0.08,0.016,75,19,9,99.62,2015,,<1,19,9.1,21.3,3.5,12.2,150.6,2,151.2,0.7,10.7,5.1,272,1.1,126.9,27.2,35.9,68.9,7.98,30.3,5.63,1.16,5.01,0.83,4.24,0.92,2.66,0.43,2.9,0.42,1.73,0.91,6.8,40.8,12.9,157,62.4,12.8,0.6,0.2,0.1,0.1,<0.5,0.1,0.4,2,,70.9,0.33,1.2,0.22,0.32,442,481,0.06,0.14,1.02,0.88,118,6,31,0.5
"Gal and Pyle, 2012, NWT OR 2012 009",well,Bluefish K-71,300K716500125450,96C,64.841784,-125.9936773,Imperial,Mirror Lake,rock chips,1195.121951,"BLUEFISH K-71-3920			",,58.83,17.56,6.47,1.98,0.78,0.64,3.09,0.69,0.08,0.06,0.014,96,18,9.5,99.64,2137,,<1,17.7,8.9,19.9,2.9,11.7,152.7,3,152.6,0.7,9.4,5.5,253,1,111.2,24.9,34.7,61.1,7.07,28.9,4.84,1.13,4.5,0.71,4.38,0.8,2.65,0.34,2.29,0.4,2.16,1.14,12.3,45.9,14.2,249,72.4,15.1,0.6,0.4,0.1,0.1,<0.5,0.15,0.5,2.5,,70.7,0.79,2,0.28,0.34,446,485,0.23,0.26,1.5,1.24,135,15,23,0.6
"Gal and Pyle, 2012, NWT OR 2012 009",well,Bluefish K-71,300K716500125450,96C,64.841784,-125.9936773,Canol,Dodo Canyon,rock chips,1210.365854,"BLUEFISH K-71-3970			",,65.25,13.34,5.73,1.7,0.99,0.56,2.19,0.56,0.11,0.07,0.012,87,14,9.1,99.64,1968,,5,15.1,6.6,15.3,2.9,9,104.8,2,159.1,0.6,8.5,7.6,310,1.9,97.3,23.7,29.8,55.9,6.45,23.8,4.57,1.01,4.34,0.67,3.57,0.81,2.16,0.35,2.37,0.32,2.97,1.39,22.8,44.1,12.5,181,73.5,17.5,0.8,0.6,0.1,0.2,<0.5,0.15,0.3,3.3,,70.4,1.52,4.2,0.27,0.35,441,480,0.04,0.49,2.32,1.83,179,2,15,0.4
"Gal and Pyle, 2012, NWT OR 2012 009",well,Bluefish K-71,300K716500125450,96C,64.841784,-125.9936773,Canol,Dodo Canyon,rock chips,1228.658537,"BLUEFISH K-71-4030			",,73.27,8.62,3.72,0.81,0.33,0.5,1.5,0.37,0.08,0.03,0.01,109,9,10.4,99.65,2060,,2,11.2,4.1,10.9,2,5.9,69.1,<1,132.7,0.3,5.3,17.2,290,1,65,25.3,23.2,38.4,5.39,21.8,3.96,0.88,4.02,0.61,3.25,0.67,2.18,0.3,1.89,0.27,5.49,1.63,53.6,55.4,9.8,228,90,14.1,1.1,1.1,<0.1,0.3,<0.5,0.19,0.2,5.4,,70.4,3.8,12.2,0.24,0.31,439,478,0.31,1.36,5.44,4.08,224,6,6,0.2
"Gal and Pyle, 2012, NWT OR 2012 009",well,Bluefish K-71,300K716500125450,96C,64.841784,-125.9936773,Canol,Vermillion Creek,rock chips,1231.707317,"BLUEFISH K-71-4040			",,64.76,12.95,4.84,1.57,1.31,0.68,2.44,0.57,0.1,0.04,0.012,91,14,10.3,99.58,2507,,5,18.9,6.2,15.9,2.6,9.7,109.2,2,192.1,0.6,8.4,14.1,242,1.4,107.2,26.1,32.4,58.9,7.13,28.7,5.28,1.03,4.85,0.74,3.68,0.78,2.61,0.39,2.43,0.37,4.27,2.08,31.6,64.7,14.6,188,84.6,17.5,1.2,0.7,0.2,0.3,<0.5,0.25,0.2,4.4,,70.5,2.15,6.7,0.24,0.29,447,486,0.07,0.76,3.66,2.9,183,2,8,0.6
"Gal and Pyle, 2012, NWT OR 2012 009",well,Bluefish K-71,300K716500125450,96C,64.841784,-125.9936773,Canol,Vermillion Creek,rock chips,1234.756098,"BLUEFISH K-71-4050			",,64.42,12.87,5.82,1.47,1.12,0.67,2.39,0.58,0.11,0.04,0.013,89,14,10.1,99.63,2078,,5,21.3,5.9,15.5,2.8,9.3,99.7,1,182.2,0.7,9.1,12.4,198,1.5,112.7,24.2,31.2,57.7,6.87,27,4.86,1.09,4.51,0.72,3.96,0.78,2.46,0.38,2.18,0.38,3.75,2.74,29.3,68.1,16.5,207,84.8,20.2,1.1,0.9,0.2,0.3,<0.5,0.3,0.4,3.8,,70.2,2.03,5.8,0.26,0.31,444,483,0.12,0.68,3.16,2.48,184,4,10,0.5
"Gal and Pyle, 2012, NWT OR 2012 009",well,Bluefish K-71,300K716500125450,96C,64.841784,-125.9936773,Canol,Vermillion Creek,rock chips,1237.804878,"BLUEFISH K-71-4060			",,60.39,12.55,6.56,2.05,2.67,0.63,2.25,0.58,0.12,0.06,0.014,89,13,10.9,98.76,9647,,5,21.5,5.9,14.8,2.9,9.2,99.5,2,398.7,0.6,8.4,10.5,209,1.5,109.5,23.7,32.2,57,6.65,22.7,4.91,0.99,4.49,0.72,3.87,0.75,2.38,0.42,2.19,0.34,3.91,2.88,22.1,57.4,15.2,160,82.9,20,1,0.8,0.2,0.2,<0.5,0.24,0.5,5.4,,70.5,1.85,5.4,0.26,0.3,444,483,0.06,0.62,2.96,2.34,182,2,10,0.9
"Gal and Pyle, 2012, NWT OR 2012 009",well,Bluefish K-71,300K716500125450,96C,64.841784,-125.9936773,Canol,Vermillion Creek,rock chips,1240.853659,"BLUEFISH K-71-4070			",,63.01,13.2,6.02,1.47,1.38,0.67,2.5,0.64,0.13,0.04,0.011,89,14,10.4,99.52,2813,,3,31.4,6.4,16.4,4.1,9.8,113.9,3,200,0.9,9.5,13.2,213,1.8,123.4,27.7,34.5,62.9,7.86,29.9,5.86,1.08,5.5,0.82,4.62,0.79,2.89,0.4,2.37,0.37,4.14,2.67,27.4,72,20.9,162,86.9,20.1,1.4,0.9,0.2,0.3,<0.5,0.24,0.4,5.5,,70.6,2.15,6.2,0.26,0.32,446,485,0.13,0.72,3.71,2.99,168,4,9,0.5
"Gal and Pyle, 2012, NWT OR 2012 009",well,Bluefish K-71,300K716500125450,96C,64.841784,-125.9936773,Canol,Vermillion Creek,rock chips,1246.95122,"BLUEFISH K-71-4090			",,63.91,12.34,5.55,1.55,1.49,0.68,2.24,0.58,0.11,0.04,0.013,104,13,10.9,99.46,3656,,3,26.9,5.7,14.3,2.9,8.7,97.2,<1,248.4,0.6,8.3,13.1,228,1.5,106.2,25.4,30.3,58.2,6.84,23.3,4.49,0.97,4.65,0.73,3.86,0.75,2.42,0.36,2.31,0.37,4.5,2.32,28.1,68.4,19,172,93.8,19.9,1.5,1.1,0.2,0.3,<0.5,0.3,0.4,4.3,,70.4,2.51,6.6,0.28,0.32,441,480,0.08,0.78,3.64,2.86,180,2,9,0.6
"Gal and Pyle, 2012, NWT OR 2012 009",well,Bluefish K-71,300K716500125450,96C,64.841784,-125.9936773,Canol,Vermillion Creek,rock chips,1253.04878,"BLUEFISH K-71-4110			",,69.35,8.63,4.45,0.95,1.56,0.59,1.56,0.41,0.1,0.03,0.01,104,9,10.6,98.26,14411,,2,19.2,3,10.1,1.9,7.5,63.2,2,402.1,0.6,6.1,13.1,175,1.1,70.9,21.8,23.4,45.4,5.38,22.4,3.88,1.14,3.8,0.54,3.47,0.61,1.86,0.29,1.61,0.27,5.3,2.44,33.6,55.1,13.2,142,82.9,17.8,1.6,1.4,0.2,0.2,<0.5,0.31,0.5,5.8,,70.5,3.73,10.1,0.27,0.18,437,476,0.13,1.16,4.8,3.64,209,3,4,0.6
"Gal and Pyle, 2012, NWT OR 2012 009",well,Bluefish K-71,300K716500125450,96C,64.841784,-125.9936773,Canol,Vermillion Creek,rock chips,1262.195122,"BLUEFISH K-71-4140			",,64.72,10.28,4.52,1.21,1.98,0.64,1.98,0.49,0.11,0.03,0.012,121,11,13.7,99.66,1780,,6,24,4.3,13.7,2.7,7.6,80.9,2,169.5,0.6,7.3,21.1,177,1.2,82.3,26.9,28.2,54.7,6.88,30.2,5.25,1.19,5.27,0.7,4.42,0.79,2.26,0.36,1.98,0.33,7.4,2.54,52.8,75.9,17.1,170,97.4,18.8,1.5,1.3,0.3,0.3,<0.5,0.34,0.2,5,,70,3.99,13,0.23,0.35,445,484,0.12,1.44,6.86,5.42,190,2,5,0.6
"Gal and Pyle, 2012, NWT OR 2012 009",well,Bluefish K-71,300K716500125450,96C,64.841784,-125.9936773,Canol,Vermillion Creek,rock chips,1268.292683,"BLUEFISH K-71-4160			",,69.48,8.98,3.21,0.93,1.78,0.66,1.63,0.44,0.1,0.02,0.009,110,9,12.5,99.71,1572,,3,14.3,3.8,11.1,2.3,8.2,68.7,2,215.1,0.6,6.4,16.2,227,1.2,81.6,26.3,26,51.8,6.34,27.9,4.81,1.08,4.37,0.64,3.78,0.75,2.31,0.32,2.12,0.31,7.26,1.9,49.6,71.9,14.4,121,89.8,13.1,1.4,1.1,0.2,0.3,<0.5,0.23,<0.1,5.5,,70,4.29,15.1,0.22,0.31,439,478,0.28,1.64,6.97,5.33,217,4,4,0.4
"Gal and Pyle, 2012, NWT OR 2012 009",well,Bluefish K-71,300K716500125450,96C,64.841784,-125.9936773,Hare Indian,Prohibition Creek,rock chips,1271.341463,"BLUEFISH K-71-4170			",,67.21,9.23,3.35,1.27,2.83,0.6,1.6,0.44,0.15,0.03,0.011,129,9,13,99.7,1357,,2,13.8,3.8,11.3,2.5,6.9,69.9,1,283.6,0.5,7.2,17.1,295,0.8,79,31,27,48.8,6.19,25.1,4.71,1.09,4.47,0.64,3.87,0.83,2.28,0.33,1.81,0.29,7.11,1.49,55.5,61.4,13.4,168,88.3,12.4,1.8,1.4,0.2,0.3,<0.5,0.16,<0.1,5.1,,70,4.33,14,0.24,0.36,440,479,0.26,1.55,6.55,5,213,4,5,0.8
"Gal and Pyle, 2012, NWT OR 2012 009",well,Bluefish K-71,300K716500125450,96C,64.841784,-125.9936773,Hare Indian,Prohibition Creek,rock chips,1286.585366,"BLUEFISH K-71-4220			",,61.27,12.2,5.26,2.14,3.73,0.49,2.06,0.5,0.11,0.05,0.013,112,12,11.8,99.67,1485,,2,11.9,5.7,14.1,1.7,7.1,96.5,1,248.9,0.5,7.4,8.8,262,0.8,72.7,25.8,26.8,51.6,6.2,27.4,4.89,1.06,4.34,0.59,3.7,0.71,2.03,0.32,1.76,0.31,4.53,1.87,37.8,38.3,9.3,210,91.5,15.5,1.2,0.7,0.1,0.3,<0.5,0.15,0.3,3.6,,70.4,1.47,4.1,0.26,0.35,449,488,0.09,0.48,2.43,1.95,170,4,14,0.8
"Gal and Pyle, 2012, NWT OR 2012 009",well,Bluefish K-71,300K716500125450,96C,64.841784,-125.9936773,Hare Indian,Francis Creek ,rock chips,1301.829268,"BLUEFISH K-71-4270			",,57.13,16.26,5.77,2.01,2.33,0.52,2.8,0.66,0.1,0.04,0.017,122,15,12.1,99.68,1457,,5,16.1,8.8,19,2.5,11,144.4,2,200.8,0.7,10.1,8.1,336,1,97.4,27.4,36.1,66.6,8.07,32.2,5.75,1.2,4.55,0.69,4.06,0.83,2.34,0.37,2.12,0.34,3.67,1.98,33.3,36.7,13.4,227,101.6,18.6,1.9,0.7,0.1,0.2,<0.5,0.18,0.8,5.3,,70.7,1.36,4.3,0.24,0.31,444,483,0.01,0.48,2.65,2.17,160,0,12,0.8
"Gal and Pyle, 2012, NWT OR 2012 009",well,Bluefish K-71,300K716500125450,96C,64.841784,-125.9936773,Hare Indian,Bluefish,rock chips,1304.878049,"BLUEFISH K-71-4280			",,57.35,17.51,5.61,1.9,1.7,0.57,3.05,0.7,0.1,0.04,0.017,119,16,11.1,99.67,1371,,5,17.3,9.5,19.8,2.9,11.7,147.9,3,180.1,0.7,11,7.6,339,1.4,99.7,27.9,35.7,67.9,7.93,29.5,5.55,1.12,4.82,0.67,3.63,0.8,2.35,0.36,1.86,0.35,3.44,2.18,27,37.8,13.8,287,103.8,19.9,2.4,1,0.2,0.3,<0.5,0.19,0.7,6.1,,70.7,1.81,5.6,0.24,0.3,450,489,0.03,0.62,3.12,2.5,179,1,10,0.6
"Gal and Pyle, 2012, NWT OR 2012 009",well,Bluefish K-71,300K716500125450,96C,64.841784,-125.9936773,Hare Indian,Bluefish,rock chips,1310.97561,"BLUEFISH K-71-4300			",,54.93,15.42,5.31,2.43,4.45,0.56,2.68,0.65,0.12,0.05,0.015,160,15,13.1,99.67,1291,,2,15.9,8.3,17.7,2.4,11,129.2,3,244.1,0.7,9.3,11.5,296,1.1,101.5,31.1,35.2,63.2,7.96,35.5,5.69,1.2,4.97,0.73,4.82,0.83,2.46,0.39,2.69,0.4,5,1.93,39.4,41.5,12,301,121.9,21.5,2.8,1.5,0.1,0.4,<0.5,0.21,0.5,5.4,,70.1,1.75,6.3,0.22,0.31,448,487,0.09,0.69,3.65,2.96,172,2,8,1.3
"Gal and Pyle, 2012, NWT OR 2012 009",well,Bluefish K-71,300K716500125450,96C,64.841784,-125.9936773,Hare Indian,Bluefish,rock chips,1314.02439,"BLUEFISH K-71-4310			",,61.67,11.77,4.21,1.41,4.37,0.51,2.12,0.51,0.11,0.03,0.013,205,12,12.9,99.67,1245,,6,12.6,6.8,13.8,2.3,9.5,100.8,2,236.4,0.6,6.7,18.5,399,0.7,87.2,30.1,30.2,51.3,6.89,27.4,5.02,1.11,4.59,0.66,4.01,0.79,2.52,0.36,2.28,0.34,5.77,1.95,75.5,48.9,10.9,372,152.6,18.4,4.1,2.2,0.1,0.4,<0.5,0.25,0.3,8.1,,70.4,2.07,7.6,0.22,0.34,448,487,0.02,0.82,4.48,3.66,169,0,8,0.9
"Gal and Pyle, 2012, NWT OR 2012 009",well,Bluefish K-71,300K716500125450,96C,64.841784,-125.9936773,Hare Indian,Bluefish,rock chips,1320.121951,"BLUEFISH K-71-4330			",,59.5,10.22,3.69,1.37,8.17,0.44,1.86,0.43,0.09,0.03,0.012,174,10,13.9,99.7,1045,,<1,10.8,5.8,11.8,1.4,7,87.5,1,311.7,0.5,6.1,20.3,272,0.9,76.6,26.9,27.5,47.6,6.1,23.5,4.47,0.88,4.05,0.6,3.68,0.79,2.05,0.3,1.55,0.29,6.41,1.9,81.3,44.2,9.2,236,138,14.9,2.5,1.6,<0.1,0.2,<0.5,0.25,0.4,7.1,,70,1.9,6.9,0.22,0.3,449,488,0.36,0.76,4.08,3.32,168,9,7,1.7
"Gal and Pyle, 2012, NWT OR 2012 009",well,Brackett Lake C-21,300C216520125000,96F,65.167335,-125.0873229,Canol,Canol,rock chips,347.5609756,"BRACKETT LK C-21-1140			",,56.26,9.4,4.82,1.91,5.17,0.43,1.91,0.44,0.1,0.03,0.009,99,10,19.3,99.75,946,,6,28.6,4.4,11.1,2.3,7.2,77.3,2,217.3,0.5,6.8,20.7,141,1.2,86,25.9,29,55.9,6.54,26.8,5,0.98,4.52,0.67,3.88,0.69,2.17,0.31,1.8,0.33,9.71,3.29,37.3,67.9,18.4,126,79.8,17.3,1.9,1.4,0.4,0.4,1.4,0.37,2.1,6.1,,70.8,2.42,36.3,0.06,0.72,425,464,0.72,3.28,7.44,4.16,488,10,10,1.4
"Gal and Pyle, 2012, NWT OR 2012 009",well,Brackett Lake C-21,300C216520125000,96F,65.167335,-125.0873229,Canol,Canol,rock chips,362.804878,"BRACKETT LK C-21-1190			",,54.76,13.37,3.95,2.11,5.38,0.47,2.68,0.49,0.08,0.02,0.014,133,12,16.4,99.77,607,,1,14.7,8.6,15,1.9,9.2,124.9,3,220.1,0.6,7.7,10.4,268,0.9,76.2,26,32.2,53.6,6.58,25.7,4.54,0.84,3.97,0.56,3.31,0.72,2.08,0.32,2.02,0.29,6.63,1.6,20.8,38.7,10.5,227,99.1,12,2.6,0.7,0.1,0.2,1,0.17,0.7,4.9,,70.1,2.29,27.9,0.08,0.81,430,469,0.39,2.55,5.66,3.11,493,7,14,1.1
"Gal and Pyle, 2012, NWT OR 2012 009",well,Brackett Lake C-21,300C216520125000,96F,65.167335,-125.0873229,Ramparts,Ramparts,rock chips,368.902439,"BRACKETT LK C-21-1210			",,51.23,15.68,4.71,2.17,5.42,0.46,2.93,0.56,0.08,0.03,0.016,114,13,16.5,99.77,612,,6,15.8,9.2,18.3,2.2,9,143.7,2,228.8,0.7,8.9,9.5,237,1.4,82.8,26,34.1,58.7,6.98,25.5,4.59,0.98,4.23,0.59,3.9,0.7,2.19,0.32,1.91,0.3,6.07,1.8,18.3,34.3,11,186,90.6,13.7,1.9,0.7,0.1,0.2,1.4,0.15,0.9,3.8,,71.1,1.79,18.8,0.09,0.61,429,468,0.29,1.75,4.29,2.54,438,7,14,1.9
"Gal and Pyle, 2012, NWT OR 2012 009",well,Brackett Lake C-21,300C216520125000,96F,65.167335,-125.0873229,Hare Indian,Hare Indian,rock chips,387.195122,"BRACKETT LK C-21-1340			",,63.43,9.8,3.16,1.66,5.03,0.4,1.97,0.39,0.09,0.02,0.01,96,9,13.8,99.77,907,,3,11.8,5.4,11.8,1.6,6.4,91.5,1,207.1,0.5,6.1,8.5,224,0.7,71.4,21.2,26.2,44.6,5.4,21.4,3.66,0.72,3.47,0.49,2.82,0.56,1.74,0.25,1.51,0.25,5.57,1.55,18.4,34,9.2,171,75.7,8.4,2.1,0.8,<0.1,0.2,1.7,0.12,0.7,4.2,,70.3,0.53,5.2,0.09,0.56,425,464,0.2,0.51,1.6,1.09,326,12,35,4.7
"Gal and Pyle, 2012, NWT OR 2012 009",well,Brackett Lake C-21,300C216520125000,96F,65.167335,-125.0873229,Hare Indian,Hare Indian,rock chips,408.5365854,"BRACKETT LK C-21-1410			",,51.97,15.75,7.33,1.99,5.69,0.45,2.57,0.75,0.15,0.15,0.016,75,15,13,99.77,799,,1,20.1,7.2,19.8,4.1,12.3,128.6,3,213.4,1,13.3,6.5,145,1.4,136,31.9,43.8,92,9.95,37.9,7.28,1.41,6.1,0.88,4.95,1.05,2.81,0.44,2.61,0.43,3.4,1.11,8.4,29.9,17.4,98,53,11,0.6,0.3,0.3,<0.1,0.8,0.08,0.5,1.3,,70.7,2.35,25.9,0.08,0.65,429,468,0.45,2.39,5.27,2.88,491,9,12,1.2
"Gal and Pyle, 2012, NWT OR 2012 009",well,Brackett Lake C-21,300C216520125000,96F,65.167335,-125.0873229,Hare Indian,Hare Indian,rock chips,429.8780488,"BRACKETT LK C-21-1460			",,54.24,17.43,7.25,2.01,3.72,0.52,2.8,0.84,0.15,0.13,0.014,68,16,10.6,99.73,932,,5,19.3,8.9,20.4,4.6,16.2,145.9,2,188.2,1.2,14.4,4.3,151,1.7,154.8,32.1,48.3,105.3,11,42.4,7.7,1.56,6.5,0.98,5.34,1.18,3.04,0.47,2.76,0.47,1.91,0.57,3.3,28.1,19.3,165,51.8,12.3,0.3,0.2,0.3,<0.1,1.6,0.08,0.3,0.9,,70.4,0.77,7.8,0.09,0.71,425,464,0.53,0.76,2.35,1.59,331,23,30,1.4
"Gal and Pyle, 2012, NWT OR 2012 009",well,Brackett Lake C-21,300C216520125000,96F,65.167335,-125.0873229,Hare Indian,Hare Indian,rock chips,445.1219512,"BRACKETT LK C-21-1510			",,54.36,16.56,6.72,1.95,4.44,0.56,2.61,0.79,0.15,0.11,0.015,64,15,11.5,99.74,1082,,1,18.8,7.9,20,4.2,13.8,129.2,4,196.7,1.1,14,6,135,1.6,146.9,33.4,45.1,97.4,10.39,39.5,7.39,1.52,6.65,0.97,5.54,1.11,3.09,0.49,2.88,0.45,2.39,0.58,3.6,27.5,38.8,96,49.8,12.2,0.3,0.3,0.2,<0.1,0.7,0.07,0.4,0.7,,70,0.41,2,0.17,0.44,428,467,0.15,0.23,0.94,0.71,217,16,47,0.9
"Gal and Pyle, 2012, NWT OR 2012 009",well,Brackett Lake C-21,300C216520125000,96F,65.167335,-125.0873229,Hare Indian,Hare Indian,rock chips,460.3658537,"BRACKETT LK C-21-1560			",,53.9,15.16,6.27,1.76,6.62,0.51,2.36,0.75,0.16,0.11,0.013,53,15,12.2,99.78,781,,4,16.5,6.7,17.2,4.6,13.4,112.5,3,219.3,0.8,13.2,5.1,125,1.8,163.8,33.9,45.2,96.2,10.31,39,7.78,1.55,6.98,1.04,6.01,1.11,3.48,0.48,2.83,0.44,2.53,0.55,3.8,22.7,16.3,84,40.5,12.3,0.4,0.2,0.2,<0.1,0.7,0.05,0.3,0.6,,70.3,0.93,4.9,0.16,0.93,425,464,0.52,0.54,1.73,1.19,286,30,54,1.1
"Gal and Pyle, 2012, NWT OR 2012 009",well,Brackett Lake C-21,300C216520125000,96F,65.167335,-125.0873229,Hare Indian,Hare Indian,rock chips,475.6097561,"BRACKETT LK C-21-1620			",,52.95,16.99,7.01,1.87,5.31,0.49,2.57,0.81,0.16,0.08,0.02,69,15,11.5,99.79,605,,3,21.1,7.9,19.7,4.7,13.3,132.9,3,186.1,1,14.7,4.5,138,2.2,153.3,32.4,45.4,98.8,10.54,40.2,7.5,1.61,7.06,0.99,5.26,1.12,3.18,0.47,2.73,0.47,1.96,0.92,3.3,23.8,26.5,97,52.4,14.2,0.2,0.2,0.2,<0.1,1,0.09,0.2,0.8,,70.9,0.36,1.9,0.16,0.53,426,465,0.14,0.21,0.87,0.66,215,16,61,1.7
"Gal and Pyle, 2012, NWT OR 2012 009",well,Brackett Lake C-21,300C216520125000,96F,65.167335,-125.0873229,Hare Indian,Hare Indian,rock chips,493.902439,"BRACKETT LK C-21-1680			",,53,17.05,7.06,2.08,4.26,0.49,2.59,0.79,0.16,0.09,0.014,70,16,12.1,99.7,1540,,<1,20.2,8.6,21.1,3.7,14.9,146.8,3,207,0.9,13,6.6,169,1.9,143.9,32.1,44.1,85.8,10.48,39.3,7.29,1.37,6.31,0.94,5.35,1.11,3.18,0.47,3.2,0.44,2.47,1.28,6.7,29.1,21.7,122,60.4,15.4,0.9,0.5,0.4,0.1,9,0.17,0.6,0.8,,70.6,0.25,1.8,0.12,0.63,430,469,0.08,0.19,0.85,0.66,207,9,74,1.1
"Gal and Pyle, 2012, NWT OR 2012 009",well,Brackett Lake C-21,300C216520125000,96F,65.167335,-125.0873229,Hare Indian,Hare Indian,rock chips,512.195122,"BRACKETT LK C-21-1730			",,53.62,18.69,6.73,2.05,3.5,0.45,2.72,0.86,0.14,0.07,0.016,59,18,11,99.8,634,,2,22.4,9.9,24.5,4.1,17.1,162.9,4,184.7,0.9,15.2,5,163,1.9,151.7,30.8,47.7,92.8,10.8,39.5,7.14,1.42,6.37,0.99,5.77,1.07,3.37,0.54,3.31,0.49,1.66,0.59,2.9,28.4,20.2,111,54.5,11.3,0.3,0.3,0.4,0.1,2.8,0.08,0.4,0.6,,70.2,0.47,4.2,0.1,0.7,422,461,0.17,0.42,1.76,1.34,239,10,40,1.1
"Gal and Pyle, 2012, NWT OR 2012 009",well,Brackett Lake C-21,300C216520125000,96F,65.167335,-125.0873229,Hare Indian,Hare Indian,rock chips,527.4390244,"BRACKETT LK C-21-1860			",,52.95,19.44,7.09,1.94,3.28,0.5,2.76,0.84,0.14,0.07,0.016,64,18,10.8,99.83,605,,5,20.3,9.2,23.8,3.6,15.6,171.5,3,177.1,1,14.9,3.7,167,1.2,139.9,28.1,45.1,87.2,10.18,34.6,6.71,1.28,5.74,0.87,5.43,1.03,2.99,0.47,3.33,0.44,1.42,1.39,3.3,23.7,19.2,143,64.7,13.1,0.5,0.2,0.3,0.6,5,0.06,0.7,1,,70.6,0.45,4.3,0.1,0.52,433,472,0.22,0.42,1.5,1.08,285,15,35,0.8
"Gal and Pyle, 2012, NWT OR 2012 009",well,Brackett Lake C-21,300C216520125000,96F,65.167335,-125.0873229,Hare Indian,Hare Indian,rock chips,567.0731707,"BRACKETT LK C-21-1920			",,54.03,19.23,6.44,1.93,2.96,0.48,2.73,0.82,0.25,0.06,0.016,71,18,10.9,99.82,520,,2,18.5,9.6,23.1,3.2,15.4,161.3,4,184.2,0.9,13.3,3.7,177,1.6,129.1,27.6,43,77.7,9.44,33.5,6.1,1.19,5.3,0.79,4.25,0.94,2.9,0.44,2.85,0.42,1.59,1.28,5.9,24.8,17.9,154,64.8,14.1,0.6,0.3,0.3,0.2,5.2,0.1,1,2.4,,69.8,0.33,1.2,0.22,0.37,435,474,0.15,0.15,0.61,0.46,193,25,61,1
"Gal and Pyle, 2012, NWT OR 2012 009",well,Brackett Lake C-21,300C216520125000,96F,65.167335,-125.0873229,Hare Indian,Hare Indian,rock chips,585.3658537,"BRACKETT LK C-21-1930			",,54.22,19.4,6.67,1.93,2.4,0.45,2.77,0.81,0.11,0.05,0.016,81,18,10.8,99.68,1804,,2,20.1,10,23.8,3.5,14.3,166.7,3,178.7,0.9,13,4,178,4,125.9,26.1,41.7,79,9.34,33.1,6.2,1.15,5.02,0.8,4.27,0.85,2.82,0.45,2.75,0.39,1.52,1.46,6.5,23.5,22.5,147,78.2,14,0.6,0.2,0.3,0.1,3.1,0.06,1.1,1.5,,70.4,0.55,2.4,0.18,0.42,435,474,0.08,0.27,1.06,0.79,230,8,40,0.5
"Gal and Pyle, 2012, NWT OR 2012 009",well,Brackett Lake C-21,300C216520125000,96F,65.167335,-125.0873229,Hare Indian,Hare Indian,rock chips,588.4146341,"BRACKETT LK C-21-1940			",,53.12,18.4,6.44,2.07,3.06,0.5,2.67,0.76,0.11,0.05,0.015,88,17,12.6,99.8,528,,6,19.3,9.9,22.3,3.1,13.6,157.7,3,164.9,1.1,12.7,5.8,197,1.9,121.2,27.9,41,77.7,9.16,34.1,6.3,1.15,5.12,0.79,4.59,0.95,2.84,0.44,2.96,0.41,2.99,1.45,10,29.6,18.5,272,85.9,13.5,1.6,0.5,0.3,0.2,2.6,0.1,1.1,2.7,,71,0.39,1.2,0.24,0.37,437,476,0.12,0.16,0.63,0.47,195,19,59,0.8
"Gal and Pyle, 2012, NWT OR 2012 009",well,Brackett Lake C-21,300C216520125000,96F,65.167335,-125.0873229,Hare Indian,Bluefish,rock chips,591.4634146,"BRACKETT LK C-21-1950			",,51.3,13.1,4.64,1.9,8.42,0.44,2,0.58,0.12,0.04,0.014,170,12,17.2,99.74,527,,6,13,7,15.7,2.7,11.4,116.3,3,236.4,0.6,9.8,15.1,427,1.3,103.6,28.6,34,59,8,30.1,5.73,1.06,5,0.77,4.5,0.89,2.81,0.38,2.45,0.34,6.62,1.34,35.1,37.1,14,445,147.2,16.7,4.8,2,0.2,0.6,1.7,0.18,1,7.1,,70.8,1.12,7.1,0.14,0.42,437,476,0.06,0.7,2.19,1.49,322,3,19,0.9
"Gal and Pyle, 2012, NWT OR 2012 009",well,Brackett Lake C-21,300C216520125000,96F,65.167335,-125.0873229,Hare Indian,Bluefish,rock chips,594.5121951,"BRACKETT LK C-21-1960			",,53.24,14.98,5.23,1.89,5.67,0.44,2.31,0.66,0.12,0.04,0.015,176,14,15.2,99.77,497,,4,16.2,8.6,18,3.2,12,134.7,2,194.4,0.9,11.6,15.6,345,1.4,125,34.4,39.2,70.8,8.95,34.2,6.73,1.26,5.63,0.94,5.36,1.15,2.86,0.47,2.83,0.41,5.09,1.55,41.5,34.6,17,395,148.8,18,3.9,1.8,0.2,0.5,1.4,0.19,1.5,6.9,,70.8,2.05,16.8,0.11,0.55,436,475,0.27,1.6,4.34,2.74,388,6,13,2
"Gal and Pyle, 2012, NWT OR 2012 009",well,Brackett Lake C-21,300C216520125000,96F,65.167335,-125.0873229,Hare Indian,Bluefish,rock chips,597.5609756,"BRACKETT LK C-21-1970			",,52.95,17.12,5.78,1.97,4.55,0.51,2.54,0.73,0.09,0.04,0.015,105,16,13.5,99.8,583,,2,17.2,8.8,20.2,3.6,14,148.8,3,190.3,0.9,11.9,7.2,204,1.7,122.2,26,39,71.5,8.66,34.2,5.94,1.11,4.84,0.77,4.69,0.95,2.64,0.42,2.57,0.39,3.44,1.47,20.6,29.7,16.3,187,98,15.8,1.6,0.6,0.3,0.2,1.7,0.12,1.2,2.9,,70.7,1.69,13.9,0.11,0.54,436,475,0.28,1.32,3.75,2.43,369,7,14,1.4
"Gal and Pyle, 2012, NWT OR 2012 009",well,Brackett Lake C-21,300C216520125000,96F,65.167335,-125.0873229,Hare Indian,Bluefish,rock chips,600.6097561,"BRACKETT LK C-21-1990			",,53.15,16.33,5.7,1.89,4.5,0.32,2.49,0.7,0.1,0.04,0.015,136,15,14.5,99.77,764,,5,16,9,19.6,3.3,12.5,146.7,2,184.7,0.9,10.3,9.3,224,1.6,110.6,26,37.4,65.4,8.23,31.9,5.54,1,4.97,0.73,4.07,0.89,2.55,0.39,2.38,0.38,4.24,1.78,29.1,32.3,23.3,250,125.8,17.7,2.2,1.5,0.2,0.3,3.5,0.19,2.2,4.9,,70.7,1.1,8.1,0.12,0.17,438,477,0.31,0.79,2.36,1.57,344,13,7,1.1
"Gal and Pyle, 2012, NWT OR 2012 009",well,Brackett Lake C-21,300C216520125000,96F,65.167335,-125.0873229,Hare Indian,Bluefish,rock chips,606.7073171,"BRACKETT LK C-21-2010			",,57.04,12.67,4.32,1.71,5.45,0.31,2.04,0.54,0.1,0.03,0.013,174,12,15.5,99.79,502,,3,13.1,6.8,16,2.6,9.8,121.3,2,191.1,0.6,8.4,14.9,289,1.3,91.6,26,29.9,51.7,7,28.8,4.74,0.92,4.33,0.68,3.27,0.78,2.23,0.34,2.22,0.32,6.11,1.58,49,41.7,13.4,355,154.8,17.9,3.1,1.5,0.2,0.4,<0.5,0.24,1.5,6.1,,70.6,1.5,13.2,0.1,0.42,437,476,0.12,1.24,3.36,2.12,392,4,13,1.2
"Gal and Pyle, 2012, NWT OR 2012 009",well,Brackett Lake C-21,300C216520125000,96F,65.167335,-125.0873229,Hare Indian,Bluefish,rock chips,612.804878,"BRACKETT LK C-21-2030			",,58.55,12.02,4.03,1.75,5.39,0.33,1.99,0.51,0.09,0.03,0.012,154,12,15.1,99.8,542,,5,13.1,7.2,15.4,2.7,9.8,115.8,2,200.9,0.6,7.9,14.5,258,1.3,89.6,26.4,30.2,49.8,6.73,28.2,4.79,0.99,4.31,0.65,4.05,0.76,1.95,0.36,2.11,0.33,6.12,1.59,46.4,38,13.6,262,134.7,16.3,2.5,1.2,0.2,0.2,1.2,0.23,1.5,6.1,,70.8,2.3,21.1,0.1,0.49,436,475,0.26,1.97,5.12,3.15,411,5,10,1.3
"Gal and Pyle, 2012, NWT OR 2012 009",well,Brackett Lake C-21,300C216520125000,96F,65.167335,-125.0873229,Hare Indian,Bluefish,rock chips,618.902439,"BRACKETT LK C-21-2040			",,58.44,12.13,4.01,1.76,5.62,0.35,2.04,0.52,0.1,0.03,0.014,153,12,14.8,99.79,466,,2,10.9,5.9,13.5,2.5,8.9,102.8,2,191,0.6,8,12.3,231,1.7,88,25,30.4,49.4,6.61,28.3,4.51,0.94,4.29,0.62,3.67,0.81,2.12,0.33,2.01,0.3,5.83,1.52,46.4,38.1,13.4,281,127.1,14,3,1.2,0.2,0.3,1.3,0.19,1.6,5.6,,71.1,2.91,21.1,0.12,0.44,437,476,0.24,2.02,4.95,2.93,426,5,9,1.3
"Gal and Pyle, 2012, NWT OR 2012 009",well,Brackett Lake C-21,300C216520125000,96F,65.167335,-125.0873229,Hare Indian,Bluefish,rock chips,621.9512195,"BRACKETT LK C-21-2050			",,60.05,11.31,3.82,1.54,5.33,0.43,1.95,0.51,0.09,0.03,0.012,159,11,14.7,99.78,608,,4,11.7,6.6,14.6,2.6,9.4,106,2,194.8,0.7,7.8,12.4,339,1.4,99.2,26,28.5,49.4,6.73,26.4,4.75,0.93,4.6,0.63,3.83,0.76,2.17,0.35,2.2,0.34,6.27,1.54,47.7,45,12.1,291,134.3,12.2,6.3,1.1,0.2,0.3,2.9,0.18,0.9,8.4,,70.8,2.48,20,0.11,0.39,437,476,0.34,1.9,4.67,2.77,428,7,8,1.2
"Pyle and Gal, 2012, NWT OR 2012 008",outcrop,Canyon Creek,,96E,65.25587,-126.4666148,canol,canol,rock pulp,0 to 1.5,11CC-001,,66.55,8.69,2.56,1.09,4.24,0.11,1.76,0.38,0.1,<0.01,0.014,176,9,14.1,99.63,1618,,2,10.7,4.9,11.1,1.9,6.6,82.7,1,257.9,0.3,5.4,21.2,406,1,66.5,29.9,30.3,43,6.17,27,4.2,0.85,4.13,0.64,3.55,0.86,2.19,0.4,2.3,0.34,7.06,1.87,76,67,9.3,387,147.6,16.1,3,1.1,0.1,0.5,<0.5,0.16,0.6,5.1,,70.6,1.64,25.05,0.06,0.19,438,478,0.06,2.23,5.95,3.72,421,1,3,1.1
"Pyle and Gal, 2012, NWT OR 2012 008",outcrop,Canyon Creek,,96E,65.25587,-126.4666148,canol,canol,rock pulp,1.5 to 6,11CC-002,,82.77,4.39,1.09,0.27,0.79,0.08,0.85,0.2,0.05,<0.01,0.006,49,5,9.2,99.73,1852,,<1,1.4,2.2,5.3,1.1,3,37.2,<1,112.5,0.3,3.1,10.4,305,<0.5,39.7,8.6,13.6,20.1,2.72,12.8,1.9,0.33,1.31,0.21,1.12,0.29,0.83,0.14,0.93,0.14,4.82,0.67,41.3,38.5,10,24,20.2,7.8,0.3,1.6,0.1,0.3,<0.5,0.13,0.4,3.6,,70.6,1.95,18.93,0.09,0.34,429,469,0.18,1.76,4.65,2.89,407,4,7,0.1
"Pyle and Gal, 2012, NWT OR 2012 008",outcrop,Canyon Creek,,96E,65.25587,-126.4666148,canol,canol,rock pulp,6 to 9,11CC-003,,72.13,7.67,2.83,0.68,2.22,0.14,1.67,0.41,0.14,0.01,0.011,111,8,11.7,99.66,1952,,2,17.7,3.9,9.9,2.3,8,70.5,1,213.8,0.6,6.3,12.8,228,1.2,86.8,32.6,27.8,48.5,6.1,22.2,4.73,1.04,4.94,0.78,4.31,0.98,2.81,0.46,2.73,0.38,6.04,1.95,49.9,81.2,19.1,159,113.6,17.9,2.3,1.3,0.2,0.4,<0.5,0.26,0.3,5.3,,70.2,2.02,19.34,0.09,0.31,434,474,0.06,1.79,5.38,3.59,359,1,6,0.5
"Pyle and Gal, 2012, NWT OR 2012 008",outcrop,Canyon Creek,,96E,65.25587,-126.4666148,canol,canol,rock pulp,0 to 3,11CC-004,,77.88,7.07,1.19,0.45,1.16,0.25,1.53,0.35,0.06,<0.01,0.01,37,6,9.8,99.71,2036,,<1,3.5,3.5,9.1,2.2,6.8,62.3,1,142.3,0.4,5.2,11.3,144,1.3,81.7,16.7,21.6,42.3,4.79,18,3.15,0.68,2.35,0.42,2.16,0.52,1.6,0.26,1.71,0.23,4.28,1.03,30.6,14.3,14.6,23,27.9,11.6,<0.1,1,0.2,0.3,<0.5,0.3,0.3,3.1,,70,2.02,14.99,0.12,0.47,425,465,0.31,1.45,4.14,2.69,362,7,11,0.2
"Pyle and Gal, 2012, NWT OR 2012 008",outcrop,Canyon Creek,,96E,65.25587,-126.4666148,canol,canol,rock pulp,3 to 6,11CC-005,,79.23,7.71,0.68,0.43,0.29,0.26,1.58,0.36,0.05,<0.01,0.009,34,5,9.1,99.69,2282,,<1,1.5,3.3,9,2,5.7,64.4,1,117.1,0.4,4.4,9,169,1.2,65.5,11.9,19,38.9,4.14,14.7,2.74,0.48,1.84,0.35,2.13,0.47,1.2,0.22,1.04,0.21,4.68,0.47,16.6,6.9,8.9,7,12.8,6.5,<0.1,0.8,0.2,0.2,<0.5,0.2,0.3,1.9,,70.7,2.51,18.26,0.12,0.3,431,471,0.22,1.75,4.54,2.79,402,5,7,0.2
"Pyle and Gal, 2012, NWT OR 2012 008",outcrop,Canyon Creek,,96E,65.25587,-126.4666148,canol,canol,rock pulp,6 to 9,11CC-006,,67.56,9.25,3.62,0.97,2.87,0.37,2.07,0.45,0.09,0.02,0.009,67,9,12.4,99.69,1699,,8,18,4.3,11.7,2.4,7.8,86.3,1,187.7,0.5,6.5,11.8,159,1,86.6,22.4,26.5,55.7,6.39,25.1,4.71,1.01,4.28,0.69,3.84,0.76,2.18,0.35,2.45,0.33,5.68,2.38,13.4,61.8,14.5,120,61.7,10.6,2.6,0.8,0.2,0.2,<0.5,0.25,0.1,2.4,,70.7,1.71,16.96,0.09,0.24,436,476,0.17,1.57,4.96,3.39,342,3,5,0.7
"Pyle and Gal, 2012, NWT OR 2012 008",outcrop,Canyon Creek,,96E,65.25587,-126.4666148,canol,canol,rock pulp,9 to 12,11CC-007,,46.61,4.14,1.33,8.24,12.72,0.19,0.9,0.2,0.06,0.1,0.007,41,4,24.9,99.42,2323,,<1,3.4,2.4,11.6,1.3,3.9,37.9,<1,945.7,0.3,3.3,6.3,190,<0.5,43.2,27.3,16.8,27.2,3.44,11.2,2.76,0.46,2.87,0.43,2.29,0.66,1.9,0.29,1.4,0.32,9.56,1.05,19.4,21.7,5.1,32,16.3,4.9,0.6,0.9,<0.1,0.2,3.6,0.15,<0.1,3.9,,70,1.33,16,0.08,0.25,434,474,0.06,1.47,4.58,3.11,349,1,5,4.9
"Pyle and Gal, 2012, NWT OR 2012 008",outcrop,Canyon Creek,,96E,65.25587,-126.4666148,canol,canol,rock pulp,12 to 15,11CC-008,,80.45,4.83,1.19,0.29,0.18,0.15,1.04,0.25,0.05,<0.01,0.006,42,4,11.3,99.73,2030,,1,2.6,2.2,6.3,1.2,4.6,42.3,1,114.4,0.2,3.4,10.3,191,1.3,49.8,15.7,17.7,27.2,3.97,16.7,2.73,0.61,2.21,0.33,1.87,0.44,1.23,0.2,0.91,0.2,6.95,1.1,42.5,20.8,9.5,9,17.8,9.5,<0.1,1.2,0.1,0.3,1.5,0.2,0.4,9.1,,70.3,2.87,27.5,0.09,0.12,429,469,0.08,2.54,6.85,4.31,401,1,2,0.1
"Pyle and Gal, 2012, NWT OR 2012 008",outcrop,Canyon Creek,,96E,65.25587,-126.4666148,canol,canol,rock pulp,15 to 18,11CC-009,,81.2,5.02,0.83,0.37,0.47,0.14,1.03,0.23,0.08,<0.01,0.008,44,4,10.3,99.69,2099,,<1,0.8,1.8,11.3,1.2,4.6,43.2,<1,124,0.5,3.9,11.2,239,0.8,46.1,14,19,28.7,4.4,18.3,3.41,0.67,2.91,0.33,2.13,0.39,1.03,0.19,1.05,0.18,5.68,0.69,42.8,13,9.4,9,18.9,12.2,<0.1,1.4,0.1,0.3,0.8,0.13,0.4,6.2,,70,2.46,21.04,0.1,0.27,427,467,0.31,2,5.43,3.43,387,6,5,0.2
"Pyle and Gal, 2012, NWT OR 2012 008",outcrop,Canyon Creek,,96E,65.25587,-126.4666148,canol,canol,rock pulp,18 to 21,11CC-010,,87.83,2.74,0.89,0.2,0.05,0.09,0.51,0.13,0.06,<0.01,0.008,43,3,7.3,99.77,1929,,<1,3.3,1.2,3.6,0.6,2.6,20.6,<1,105,0.3,2.3,6.7,172,0.6,26.8,7.5,11.5,17.8,2.59,9.9,1.69,0.38,1.47,0.17,0.92,0.17,0.59,0.1,0.53,0.09,3.48,0.77,19.9,16.6,4.8,15,23.5,6,0.1,1.1,<0.1,0.2,2,0.1,0.3,6.5,,70.7,1.9,12.99,0.13,0.15,427,467,0.19,1.26,3.37,2.11,385,6,4,0.1
"Pyle and Gal, 2012, NWT OR 2012 008",outcrop,Canyon Creek,,96E,65.25587,-126.4666148,canol,canol,rock pulp,21 to 24,11CC-011,,82.19,4.61,0.72,0.38,0.43,0.12,0.97,0.24,0.1,<0.01,0.014,71,3,9.9,99.65,2235,,5,2.2,1.7,7.4,1.1,3.4,32.5,<1,111.5,0.3,3.4,7.8,242,1.7,39.8,9.4,13.2,24.4,3.27,12,2.44,0.43,1.9,0.24,1.53,0.23,0.86,0.12,0.75,0.15,5.48,0.56,23.5,6,7.5,4,22,5.8,<0.1,1.2,<0.1,0.3,1.2,0.13,0.2,5.9,,70.6,2.71,22.75,0.11,0.23,428,468,0.12,2.14,5.29,3.15,430,2,4,0.1
"Pyle and Gal, 2012, NWT OR 2012 008",outcrop,Canyon Creek,,96E,65.25587,-126.4666148,canol,canol,rock pulp,24 to 27,11CC-012,,81.14,5.8,0.79,0.41,0.15,0.15,1.35,0.36,0.06,<0.01,0.01,51,4,9.4,99.64,1957,,<1,0.6,3.3,10.4,2.3,6,58.3,<1,126.1,0.6,4.6,8.5,632,1.6,78.1,14.2,19.5,36.7,4.43,14.9,2.63,0.42,2.46,0.32,1.93,0.45,1.15,0.2,1.17,0.19,5.24,0.43,20.9,6.7,7.6,2,23.6,9,<0.1,2,<0.1,0.4,0.7,0.17,0.2,7.4,,70.4,2.08,20.04,0.09,0.47,429,469,0.35,1.87,5.1,3.23,393,7,9,0.1
"Pyle and Gal, 2012, NWT OR 2012 008",outcrop,Canyon Creek,,96E,65.25587,-126.4666148,canol,canol,rock pulp,27 to 30,11CC-013,,82.41,6.09,0.74,0.42,0.05,0.11,1.26,0.29,0.05,<0.01,0.01,43,5,8.3,99.69,2019,,4,0.4,3.3,10.8,2,5.6,59.9,<1,152.2,0.4,5.2,9.3,295,0.8,71,17.8,21.3,34.1,4.87,17.8,3.34,0.62,3.06,0.42,2.3,0.48,1.52,0.24,1.42,0.22,4.21,0.37,28.3,9.9,6.1,2,25.8,8.1,<0.1,1.5,0.3,0.3,1.2,0.04,0.3,6,,70.1,0.31,5.69,0.05,0.98,441,481,0.18,0.55,4.13,3.58,138,4,24,0.2
"Pyle and Gal, 2012, NWT OR 2012 008",outcrop,Canyon Creek,,96E,65.25587,-126.4666148,canol,canol,rock pulp,30 to 33,11CC-014,,79.59,6.71,0.75,0.48,0.14,0.14,1.36,0.29,0.06,<0.01,0.007,23,5,10.2,99.76,1636,,4,<0.2,3,11.8,2.6,11.8,59.3,<1,112.5,0.9,3.9,6.7,120,1.1,58.3,13.8,18.3,28.4,4.48,16.5,3.32,0.63,2.71,0.33,2.02,0.38,1.11,0.17,1.05,0.17,5.72,0.41,9.8,5.6,6.5,5,15.3,7.7,<0.1,1.2,0.2,0.2,1.6,<0.01,<0.1,3.7,,70.3,0.29,4.65,0.06,0.49,462,502,0.65,0.47,5.67,5.2,82,11,9,0.2
"Pyle and Gal, 2012, NWT OR 2012 008",outcrop,Canyon Creek,,96E,65.25587,-126.4666148,canol,canol,rock pulp,33 to 36,11CC-015,,82.26,4.74,1.2,0.32,0.09,0.08,0.89,0.22,0.06,<0.01,0.009,56,5,9.8,99.69,1969,,3,1.8,2.5,8.4,1.4,4,43.3,<1,106,0.4,3.3,12.9,276,0.7,44.2,15.1,16,25.8,3.5,13.4,2.81,0.54,2.31,0.27,2.2,0.38,1.08,0.16,0.84,0.16,5.35,0.62,49.2,21.9,5.9,33,29.1,11.3,0.2,1.4,0.1,0.2,1.3,0.09,1.2,5.7,,70.3,1.79,16.9,0.1,0.63,429,469,0.21,1.59,5.23,3.64,323,4,12,0.2
"Pyle and Gal, 2012, NWT OR 2012 008",outcrop,Canyon Creek,,96E,65.25587,-126.4666148,canol,canol,rock pulp,36 to 39,11CC-016,,79.28,5,1.74,0.35,0.1,0.1,1.05,0.26,0.06,<0.01,0.01,69,5,11.7,99.7,1618,,1,1.2,2.5,8.5,1.8,6,47.6,<1,111.3,0.5,4.4,13.8,394,0.7,55.8,17.8,19.7,29.8,4,12.5,3.03,0.54,2.69,0.36,2.13,0.5,1.41,0.18,1.04,0.19,6.91,0.66,81.5,17.5,6.5,10,22.5,14.4,<0.1,2.1,<0.1,0.3,1.1,0.08,1.8,8,,70.1,2.88,23.59,0.11,0.62,426,466,0.34,2.25,6.74,4.49,350,5,9,0.2
"Pyle and Gal, 2012, NWT OR 2012 008",outcrop,Canyon Creek,,96E,65.25587,-126.4666148,canol,canol,rock pulp,39 to 42,11CC-017,,77.27,6.14,0.79,0.46,0.17,0.16,1.18,0.32,0.08,<0.01,0.007,62,5,13.1,99.67,2047,,1,1.6,2.9,7.7,2,6.6,50.2,<1,163.1,0.3,4.5,13.3,485,0.7,58.2,13.9,23.5,38.5,5.41,20.6,3.87,0.78,2.92,0.35,2.18,0.44,1.28,0.17,0.92,0.17,8.21,0.46,37.4,8.9,8.7,12,29.7,8,<0.1,2.2,0.2,0.4,1.2,0.5,1.1,7.7,,70.8,4.9,30.38,0.14,1.04,427,467,0.58,3,8.05,5.05,377,7,13,0.2
"Pyle and Gal, 2012, NWT OR 2012 008",outcrop,Canyon Creek,,96E,65.25587,-126.4666148,canol,canol,rock pulp,42 to 45,11CC-018,,24.16,3.39,6.86,8.45,18.73,0.08,0.53,0.16,0.05,0.15,0.005,148,7,27,89.59,700,,<1,15.6,1.6,4.4,0.8,3,22.7,<1,298.2,0.1,3,17.8,111,0.7,40,49.9,13.1,20.6,3.27,13.2,3.73,1.17,6.36,1.1,6.55,1.36,3.77,0.58,2.88,0.44,7.64,4.59,60.9,81.5,3.2,244,145.7,17.7,4,0.7,<0.1,<0.1,0.6,0.05,0.6,8.1,,70.8,0.2,1.8,0.1,0.57,442,482,0.15,0.19,1.28,1.09,141,12,45,5.5
"Pyle and Gal, 2012, NWT OR 2012 008",outcrop,Canyon Creek,,96E,65.25587,-126.4666148,canol,canol,rock pulp,45 to 48,11CC-019,,61.85,8.63,1.65,3.49,4.96,0.15,1.57,0.34,0.05,0.05,0.008,40,7,16.8,99.59,2205,,2,3.4,5.4,10.4,2.1,6.7,81.1,1,369.6,0.4,5.1,10,347,1.8,60.4,16.8,24,38.1,5.11,19.4,3.55,0.76,2.86,0.4,2.17,0.49,1.53,0.22,1.28,0.21,7.03,0.86,21.8,12.1,8.5,17,20,11.7,<0.1,1.6,0.1,0.3,1.7,0.23,0.6,8.3,,70.3,0.8,17.38,0.04,0.32,434,474,0.19,1.53,5.09,3.56,341,4,6,2
"Pyle and Gal, 2012, NWT OR 2012 008",outcrop,Canyon Creek,,96E,65.25587,-126.4666148,canol,canol,rock pulp,48 to 51,11CC-020,,77.26,8.48,0.65,0.58,0.09,0.17,1.55,0.36,0.06,<0.01,0.008,27,6,10.5,99.73,1878,,<1,1,5.3,9.5,1.5,5.2,78.3,1,143.2,0.5,5,8.2,378,0.7,53.4,12.9,21.6,37.6,4.81,16.7,3.35,0.62,2.39,0.32,1.73,0.34,1.28,0.18,1.07,0.16,5.41,0.61,21.4,4.4,11.6,3,14.1,6.9,<0.1,1.5,0.2,0.3,0.6,0.25,0.3,8.3,,70.3,1.12,20.57,0.05,0.15,435,475,0.18,1.82,5.29,3.47,389,3,3,0.2
"Pyle and Gal, 2012, NWT OR 2012 008",outcrop,Canyon Creek,,96E,65.25587,-126.4666148,canol,canol,rock pulp,51 to 54,11CC-021,,68.01,6.17,1.43,3.34,4.67,0.17,1.12,0.32,0.08,0.02,0.006,76,6,14.2,99.51,2623,,1,4.6,3.1,7.4,1.9,5.5,50.9,1,602.3,0.3,4.5,18,325,0.8,66.4,38.1,19.9,35.8,4.82,22.6,4.97,1.27,6.15,0.92,5.19,1.06,2.42,0.39,2.14,0.33,6.02,0.84,27.2,25.3,5.9,69,52.1,10,1,1.3,<0.1,0.2,<0.5,0.11,0.7,5.3,,70.1,1.1,15.42,0.07,0.24,433,473,0.12,1.39,4.16,2.77,371,3,6,1.8
"Pyle and Gal, 2012, NWT OR 2012 008",outcrop,Canyon Creek,,96E,65.25587,-126.4666148,canol,canol,rock pulp,54 to 57,11CC-022,,72.3,11.81,2.31,0.81,0.05,0.23,2.14,0.49,0.08,<0.01,0.009,36,10,9.5,99.71,1737,,1,4.4,6.9,14,2.4,8.4,109.8,2,174.4,0.5,6.8,6.5,327,1.4,89.1,17.3,25.1,44.8,5.47,20,3.59,0.78,3.07,0.47,2.99,0.64,1.76,0.28,1.75,0.27,3.32,1.02,16.3,34.5,10,36,27.4,15.5,0.4,0.7,0.1,0.2,1,0.15,1.3,5.1,,70.1,0.7,10.35,0.06,0.35,432,472,0.19,0.94,3.23,2.29,320,6,11,0.2
"Pyle and Gal, 2012, NWT OR 2012 008",outcrop,Canyon Creek,,96E,65.25587,-126.4666148,canol,canol,rock pulp,57 to 60,11CC-023,,73.68,11.15,1.25,0.77,0.04,0.21,2.04,0.48,0.1,<0.01,0.01,48,8,9.9,99.66,1910,,4,1.9,6.3,13.3,2.1,7.7,103,2,221.6,0.5,5,8.5,453,1.4,82.4,18.6,26.2,44.3,5.77,21.5,3.98,0.74,3,0.47,2.54,0.57,1.85,0.25,1.8,0.26,3.81,0.49,23,7.7,8.9,5,21.3,11.5,<0.1,0.7,0.1,0.3,1.1,0.11,1.5,6,,70.8,0.74,13.01,0.05,0.19,432,472,0.09,1.16,3.7,2.54,352,2,5,0.2
"Pyle and Gal, 2012, NWT OR 2012 008",outcrop,Canyon Creek,,96E,65.25587,-126.4666148,canol,canol,rock pulp,60 to 63,11CC-024,,71.22,13.52,1.27,0.88,0.07,0.18,2.42,0.52,0.08,<0.01,0.01,35,10,9.5,99.67,1961,,2,1.9,7.9,15.9,2.2,9.5,132.9,2,187.2,0.7,5.6,5.3,525,1.2,84.2,15.3,26.8,46.3,5.7,21,3.71,0.69,2.55,0.4,2.48,0.56,1.73,0.25,1.75,0.26,3,0.62,10.9,7.9,7.9,5,19.3,8.9,<0.1,0.8,0.1,0.3,1.2,0.07,1.9,6.3,,71,0.44,7.92,0.05,0.16,432,472,0.21,0.73,2.9,2.17,273,7,6,0.2
"Pyle and Gal, 2012, NWT OR 2012 008",outcrop,Canyon Creek,,96E,65.25587,-126.4666148,canol,canol,rock pulp,63 to 66,11CC-025,,66.62,15.82,1.43,1.03,0.11,0.18,2.78,0.63,0.06,<0.01,0.012,35,12,11,99.7,1558,,5,2.8,8.9,18.9,2.5,10.9,149.5,3,178.3,0.7,5.9,5.6,504,1.6,105.3,18.9,32.2,57.2,6.83,26.2,4.03,0.78,2.99,0.46,2.88,0.65,1.76,0.31,1.89,0.32,2.98,0.62,7.8,7,9.9,11,16.7,7.3,<0.1,0.6,0.2,0.2,0.6,0.08,1.7,5.8,,70.3,0.43,8.09,0.05,0.13,433,473,0.15,0.74,2.89,2.15,280,5,4,0.2
"Gal and Pyle, 2012, NWT OR 2012 009",well,Canyon Creek G-51,300G516520126150,96E,65.172956,-126.4160601,Canol,Dodo Canyon,rock chips,424.3902439,"CANYON CR. G-51-1392			",,64.43,13.66,5.09,1.89,0.95,0.75,2.65,0.64,0.1,0.03,0.012,116,15,9.5,99.71,1487,,<1,23.2,7.1,16.9,3.3,9.7,117.8,2,135.9,0.8,10.5,8.4,285,1.3,119.5,23,33.2,62.3,7.15,29.4,4.76,0.98,4,0.65,3.83,0.75,2.31,0.36,2.16,0.36,3,1.69,16.2,77.8,26.6,193,103.9,23.3,2.5,1.2,0.4,0.3,2,0.31,1.2,4.7,,70.3,1.04,8.29,0.11,0.45,435,475,0.33,0.81,2.69,1.88,308,12,17,0.3
"Gal and Pyle, 2012, NWT OR 2012 009",well,Canyon Creek G-51,300G516520126150,96E,65.172956,-126.4160601,Canol,Dodo Canyon,rock chips,426.5243902,"CANYON CR. G-51-1399			",,68.65,12.4,4.62,1.49,0.58,0.72,2.38,0.57,0.1,0.02,0.012,106,14,8.2,99.69,1536,,<1,18,6.9,15.6,2.6,8.4,112.3,2,125.4,0.6,8.6,7,341,1,100,24.5,29.7,54,6.47,21.6,4.64,0.96,4.07,0.65,3.65,0.8,2.12,0.34,2.21,0.33,2.41,1.98,14.8,68.1,21.4,191,99.4,24.3,1.9,1,0.3,0.3,2.7,0.23,1.4,5.6,,70.5,1.02,6.4,0.14,0.4,435,475,0.11,0.64,2.09,1.45,306,5,19,0.2
"Gal and Pyle, 2012, NWT OR 2012 009",well,Canyon Creek G-51,300G516520126150,96E,65.172956,-126.4160601,Hume,Hume,rock chips,567.0731707,"CANYON CR. G-51-1860			",,58.44,8.45,4.17,1.13,7.84,0.6,1.9,0.44,0.11,0.02,0.008,66,9,16.6,99.71,1594,,5,19.1,4,10.5,2.3,7.7,70.7,2,311.6,0.5,6.4,15.3,111,1.5,82.8,20.2,25,47,5.49,22,3.95,0.82,3.67,0.57,3,0.65,1.76,0.26,1.69,0.27,8.49,3,19.4,73.2,15.3,99,48.2,17.9,1.7,1.3,0.3,0.3,<0.5,0.44,0.2,6.1,,70.5,1.79,18.8,0.09,0.54,440,480,0.12,1.74,6.65,4.91,283,2,8,1.5
"Gal and Pyle, 2012, NWT OR 2012 009",well,Canyon Creek G-51,300G516520126150,96E,65.172956,-126.4160601,Hume,Hume,rock chips,567.9878049,"CANYON CR. G-51-1863			",,57.93,6.84,2.93,0.76,10.59,0.45,1.49,0.37,0.13,0.01,0.008,89,8,18.1,99.63,2101,,<1,23.2,3.3,9.8,1.8,7.8,61,2,419.6,0.4,5.5,16.8,143,1.4,77.6,28.7,26.4,46.8,5.95,23.1,4.35,0.95,4.31,0.66,4.02,0.83,2.1,0.35,1.92,0.32,9.5,2.12,46.9,73.9,15.4,109,72.3,15.1,1.3,1.6,0.3,0.4,<0.5,0.29,0.3,6.2,,70.3,2,21.39,0.09,0.48,442,482,0.14,1.97,7.26,5.29,295,2,7,2
"Pyle et al., 2011, NWT OR 2011 09",outcrop,Carcajou 1,,96D,64.733628,-126.80345,Hare Indian,Hare Indian,rock chips,,LP10-74,,63.36,7.43,2.09,0.51,9.81,0.08,1.35,0.28,0.08,0.04,0.008,261,8,,,1152,,1,26.3,4.6,9,1.5,5.4,76.1,2,220.8,0.3,4,19.1,272,0.8,51.2,43,20.5,30.6,4.96,20.3,4.56,1.12,5.63,0.9,4.66,1.01,2.68,0.38,2.33,0.38,6.16,1.75,45.4,32.1,5.1,358,190.4,16.3,10.2,1.4,<0.1,0.2,<0.5,0.14,0.4,4.2,,,1.23,6.3,0.16,0.72,443,482,0.25,0.66,4.27,3.61,148,6,17,
"Pyle et al., 2011, NWT OR 2011 09",outcrop,Carcajou 1,,96D,64.733628,-126.80345,Hare Indian,Hare Indian,rock chips,,LP10-75,,39.02,10.23,3.58,3.03,18.1,0.07,1.87,0.41,0.06,0.05,0.011,144,10,,,986,,2,9.1,6.5,13.2,1.7,7.7,103.8,2,277.8,0.6,5.2,12,308,2.5,66.5,29.2,29.5,47.6,6.43,24.6,4.07,0.78,3.91,0.59,3.47,0.72,2.24,0.32,2.07,0.3,8.19,1.81,47.9,21.1,5.9,263,100.7,18.4,2.8,1,0.1,0.3,<0.5,0.12,0.4,5.7,,,0.8,4.64,0.15,0.72,449,488,0.3,0.49,4.16,3.67,112,7,17,
"Pyle et al., 2011, NWT OR 2011 09",outcrop,Carcajou 1,,96D,64.733628,-126.80345,Canol,Canol,rock chips,,LP10-76,,39.92,11.31,3.31,3.02,15.7,0.11,2.12,0.46,0.09,0.04,0.011,102,9,,,797,,2,3.4,7.3,13.1,1.8,8.2,104.2,2,372.9,0.6,5.3,10.6,480,1.4,78,24.7,31.5,48.7,6.44,23.1,3.49,0.65,2.91,0.42,2.74,0.59,1.83,0.3,1.85,0.27,9.61,2.09,38.2,18.5,8.6,68,53.5,16.3,0.5,1.7,0.1,0.5,<0.5,0.17,0.2,7,,,0.63,5.3,0.11,0.74,449,488,0.29,0.54,5.23,4.69,101,6,14,
"Pyle et al., 2011, NWT OR 2011 09",outcrop,Carcajou 1,,96D,64.733628,-126.80345,Canol,Canol,rock chips,,LP10-77,,49.85,12.67,3.96,4.34,8,0.16,2.28,0.49,0.06,0.03,0.014,110,11,,,1342,,2,10.4,7.1,14.1,2.1,8.5,114.3,2,316.1,0.6,7.6,10.1,351,1,75.1,36.5,31.6,52.2,7.13,26.3,5.26,1.15,5.36,0.86,4.88,0.98,2.98,0.42,2.53,0.37,6.36,2.02,23.3,25.5,7.7,157,74.3,14.6,2.7,0.9,0.1,0.4,<0.5,0.12,0.4,4.6,,,1.19,3.34,0.15,0.48,449,488,0.2,0.41,3.7,3.29,90,5,13,
"Pyle et al., 2011, NWT OR 2011 09",outcrop,Carcajou 1,,96D,64.733628,-126.80345,Canol,Canol,rock chips,,LP10-78,,56.86,15.6,4.23,0.88,3.82,0.1,2.85,0.59,0.07,<0.01,0.015,76,11,,,1747,,2,9.9,9.5,18.4,2.4,10.1,152.3,3,144.3,0.8,7.1,9.6,454,1.8,84.2,19.5,31,54.2,6.65,25.2,3.45,0.63,2.63,0.4,2.35,0.53,1.83,0.28,1.81,0.27,3.34,2.35,45.3,28.6,10.8,120,52,22,0.1,0.5,0.2,0.4,0.6,0.2,1.3,7.6,,,0.45,2.28,0.15,0.83,448,487,0.4,0.27,3.28,3.01,70,12,25,
"Pyle et al., 2011, NWT OR 2011 09",outcrop,Carcajou 1,,96D,64.733628,-126.80345,Canol,Canol,rock chips,,LP10-79,,57.78,11.02,3.8,0.76,8.38,0.1,2.06,0.44,0.06,0.01,0.011,81,8,,,4600,,2,3.9,6.8,12.3,2.1,7.5,102.6,2,227.7,0.5,5,9.9,408,1,69.4,19.1,24.7,42.3,5.42,19.3,2.95,0.59,2.25,0.35,2.07,0.48,1.59,0.25,1.54,0.23,5.36,2.55,57.8,15.6,8.4,63,46.7,21.3,0.5,0.9,0.1,0.3,<0.5,0.21,0.9,6.2,,,0.52,1.97,0.15,0.75,445,484,0.39,0.25,3.51,3.26,56,11,21,
"Pyle et al., 2011, NWT OR 2011 09",outcrop,Carcajou 1,,96D,64.733628,-126.80345,Canol,Canol,rock chips,,LP10-80,,73.12,9.3,2.03,0.57,1.5,0.09,1.66,0.35,0.07,<0.01,0.011,146,8,,,1804,,2,9.6,4.7,11.7,1.8,6.6,85.3,1,139.5,0.5,5.1,14.4,397,0.8,55.5,26.7,22.9,37.2,5.3,21.5,3.44,0.76,3.52,0.55,3.11,0.64,1.9,0.28,1.72,0.27,4.83,1.11,63,27.3,7.4,249,103.2,15.8,5.5,0.7,0.1,0.3,<0.5,0.17,0.6,5.4,,,0.91,5.59,0.16,0.45,450,489,0.27,0.57,4.57,4,122,6,10,
"Pyle et al., 2011, NWT OR 2011 09",outcrop,Carcajou 1,,96D,64.733628,-126.80345,Canol,Canol,rock chips,,LP10-81,,77.51,6.12,1.83,0.36,1.97,0.09,1.09,0.23,0.07,<0.01,0.007,107,5,,,2051,,1,3.5,2.9,8.2,1.2,4.3,53.2,<1,228.2,0.3,3.5,9.9,275,<0.5,42,14.5,15.4,23.8,3.37,12.3,1.96,0.4,1.72,0.26,1.64,0.37,1.16,0.17,1.04,0.16,5.76,0.78,71.6,31.2,5.4,148,65.5,12,1.2,0.8,0.1,0.2,<0.5,0.14,0.4,3.3,,,1.35,6.8,0.16,0.46,450,489,0.26,0.71,4.86,4.15,140,5,9,
"Pyle et al., 2011, NWT OR 2011 09",outcrop,Carcajou 1,,96D,64.733628,-126.80345,Canol,Canol,rock chips,,LP10-82,,76.53,6.64,1.75,0.42,1.27,0.09,1.23,0.26,0.07,<0.01,0.008,89,5,,,2452,,1,4.1,3.1,8.5,1.3,4.9,58.7,1,142.2,0.4,3.3,12.6,297,0.8,44.1,15.5,16.9,26.5,3.81,13.8,2.01,0.45,1.78,0.29,1.73,0.39,1.22,0.19,1.13,0.18,5.98,0.73,73.9,23.8,7.5,114,62.7,13.3,1.4,0.9,0.1,0.3,<0.5,0.17,0.2,3.8,,,1.52,8.16,0.16,0.74,440,479,0.44,0.85,5.44,4.59,150,8,14,
"Pyle et al., 2011, NWT OR 2011 09",outcrop,Carcajou 1,,96D,64.733628,-126.80345,Canol,Canol,rock chips,,LP10-83,,78.41,6.17,1.61,0.37,0.6,0.08,1.17,0.26,0.08,<0.01,0.009,87,5,,,2152,,2,3.3,3.3,7.8,1.4,5.3,57,<1,123.6,0.4,3.8,9.6,401,0.7,48.5,14.8,17.3,27.8,3.93,15,2.04,0.44,1.84,0.3,1.59,0.38,1.14,0.18,1.18,0.18,6.38,0.51,57,29.6,7,95,56.1,11.2,0.6,1.1,0.1,0.3,<0.5,0.14,0.3,3.4,,,1.55,8.67,0.17,0.61,443,482,0.46,0.9,5.93,5.03,146,8,10,
"Pyle et al., 2011, NWT OR 2011 09",outcrop,Carcajou 1,,96D,64.733628,-126.80345,Canol,Canol,rock chips,,LP10-84,,77.59,5.75,1.63,0.35,1.92,0.09,1.08,0.25,0.08,<0.01,0.007,113,6,,,2332,,1,7.7,2.5,7,1.4,4.8,46.6,<1,153.8,0.3,4,13.9,380,0.9,46,21.2,16.8,28.2,3.95,15.3,2.83,0.65,2.69,0.45,2.38,0.55,1.57,0.25,1.37,0.22,5.76,0.99,44.5,43.2,7.1,123,77.4,10.6,1.7,1,0.1,0.3,<0.5,0.12,0.3,3.8,,,1.57,8.05,0.17,0.61,441,480,0.37,0.84,5.21,4.37,155,7,12,
"Pyle et al., 2011, NWT OR 2011 09",outcrop,Carcajou 1,,96D,64.733628,-126.80345,Canol,Canol,rock chips,,LP10-85,,76.47,5.69,1.82,0.91,2.43,0.11,1.08,0.26,0.07,0.02,0.007,84,7,,,1908,,2,5.4,2.4,6.6,1.2,5.1,45.9,<1,171.6,0.3,4.2,15.1,385,0.5,50.3,16.3,17,30.1,4.02,16,2.56,0.49,2.07,0.35,2.09,0.46,1.36,0.2,1.3,0.21,5.81,0.88,43.8,45,7,103,51.5,9.5,0.5,1.1,0.1,0.2,<0.5,0.12,0.2,3.8,,,1.2,6.61,0.17,0.77,443,482,0.47,0.7,5.42,4.72,122,9,14,
"Pyle et al., 2011, NWT OR 2011 09",outcrop,Carcajou 1,,96D,64.733628,-126.80345,Canol,Canol,rock chips,,LP10-86,,65.27,6.14,1.44,0.4,9,0.13,1.31,0.31,0.11,0.02,0.006,95,7,,,1584,,1,5.9,3,7.6,1.7,6.5,52.2,<1,205.5,0.3,4.5,22.8,290,0.8,67.1,52.5,21.5,37.6,4.67,17.8,2.84,0.57,2.83,0.49,3.26,0.86,2.92,0.45,2.64,0.42,7.91,0.56,54.7,31.6,9.4,89,61.4,10.8,1.2,1.1,0.1,0.3,<0.5,0.15,0.4,4.1,,,1.2,7.96,0.18,0.59,447,486,0.39,0.81,5.96,5.15,134,7,10,
"Pyle et al., 2011, NWT OR 2011 09",outcrop,Carcajou 1,,96D,64.733628,-126.80345,Canol,Canol,rock chips,,LP10-87,,73.42,6.56,1.99,0.37,2.47,0.1,1.35,0.33,0.07,<0.01,0.007,121,9,,,1692,,3,12.8,3,8.1,1.9,6.2,53.2,1,109,0.4,6,23.3,250,0.9,64.3,21.1,19.1,37.1,4.78,19.8,3.78,0.84,3.56,0.59,2.95,0.64,1.86,0.27,1.65,0.27,6.38,1.43,52.3,73.6,11.6,126,99.4,9,1.1,0.7,0.1,0.3,<0.5,0.18,0.2,4,,,1.05,7.06,0.18,0.71,441,480,0.63,0.74,6.18,5.44,114,10,11,
"Pyle et al., 2011, NWT OR 2011 09",outcrop,Carcajou 1,,96D,64.733628,-126.80345,Canol,Canol,rock chips,,LP10-88,,75.54,6.49,2.22,0.36,0.9,0.12,1.38,0.33,0.07,<0.01,0.009,80,12,,,1773,,1,5.2,3.1,7.8,2,6,54.8,2,100.5,0.4,6.2,37.6,239,0.9,65.1,14.2,19.6,38.4,4.66,18.3,2.82,0.52,2.1,0.36,2.11,0.42,1.3,0.21,1.33,0.21,6.3,0.93,51.1,79.4,12.5,55,57.6,10.5,0.3,0.8,0.2,0.3,<0.5,0.2,0.3,3.9,,,0.91,6.46,0.18,0.77,435,474,0.69,0.68,6.11,5.43,106,11,13,
"Pyle et al., 2011, NWT OR 2011 09",outcrop,Carcajou 1,,96D,64.733628,-126.80345,Canol,Canol,rock chips,,LP10-89,,31.83,4.23,3.05,0.42,26.6,0.26,0.88,0.22,0.11,0.08,0.006,73,9,,,1256,,<1,21,1.8,5.5,1.2,4.8,36.8,<1,372.3,0.3,4.2,19.1,105,0.8,54.7,24.3,16.2,28.1,3.6,15.2,3.05,0.7,3.23,0.5,2.97,0.64,1.86,0.26,1.64,0.27,9.47,2.22,21,49.6,5.3,91,58.6,11.3,2,0.9,<0.1,0.2,<0.5,0.2,0.3,3.3,,,0.66,4.65,0.19,1,444,483,0.4,0.5,4.75,4.25,98,8,21,
"Pyle et al., 2011, NWT OR 2011 09",outcrop,Carcajou 1,,96D,64.733628,-126.80345,Canol,Canol,rock chips,,LP10-90,,59.83,8.7,3.84,0.52,7.32,0.38,1.99,0.44,0.13,0.03,0.009,95,11,,,2103,,2,25,3.7,11,2.5,8.3,74.2,2,214.1,0.5,6.2,12.8,145,1.4,87.6,28.2,25.2,49.2,6.07,24.1,4.76,0.97,4.51,0.7,3.78,0.79,2.17,0.32,2.03,0.32,8.06,2.46,26.3,76.8,12,130,77.4,15.5,2.9,0.7,0.4,0.3,<0.5,0.39,0.3,6.5,,,0.57,5.98,0.19,1.58,449,488,0.74,0.64,6.8,6.16,88,11,23,
"Pyle et al., 2011, NWT OR 2011 09",outcrop,Carcajou 1,,96D,64.733628,-126.80345,Canol,Canol,rock chips,,LP10-91,,60.21,7.1,3.41,0.41,9.05,0.3,1.55,0.37,0.12,0.03,0.007,76,8,,,1867,,2,16.9,3.1,9.1,1.8,7,62.3,2,203,0.5,4.8,13.2,148,1.3,74.8,19.3,23.4,42.6,5.17,18.6,2.79,0.55,2.37,0.39,2.35,0.52,1.52,0.25,1.53,0.26,8.68,1.95,34.5,49.3,11.6,98,56.7,20.1,1.3,1.1,0.3,0.3,<0.5,0.37,0.3,7.5,,,0.72,7.38,0.19,1.12,445,484,0.74,0.75,7.59,6.84,97,10,15,
"Pyle et al., 2011, NWT OR 2011 09",outcrop,Carcajou 1,,96D,64.733628,-126.80345,Canol,Canol,rock chips,,LP10-92,,74.23,6,2.42,0.29,1.91,0.12,1.22,0.3,0.07,<0.01,0.008,110,7,,,2469,,2,13.3,2.5,8.2,1.5,6,49.3,<1,116.6,0.4,4.7,17.6,224,1.2,62.8,17.6,19.4,37.4,4.64,20.5,2.93,0.6,2.65,0.4,2.14,0.45,1.39,0.23,1.4,0.22,7.28,1.17,64.3,52.2,11.8,112,79,15.4,0.8,1.4,0.2,0.3,<0.5,0.14,0.4,6,,,1.08,7.08,0.2,0.89,443,482,0.63,0.74,6.18,5.44,115,10,14,
"Pyle et al., 2011, NWT OR 2011 09",outcrop,Carcajou 1,,96D,64.733628,-126.80345,Canol,Canol,rock chips,,LP10-93,,74.21,6.41,2.76,0.31,1.18,0.24,1.37,0.33,0.07,<0.01,0.007,63,6,,,2386,,2,6.8,3,8.1,2.3,6.3,55.3,2,111,0.5,4.6,11.5,171,10.1,69.8,11.5,20,40.1,4.9,18,2.42,0.45,1.66,0.25,1.54,0.34,1.12,0.18,1.19,0.19,6.6,1.19,53.9,29,14.4,53,42.4,21.3,0.2,1.2,0.2,0.3,<0.5,0.2,0.4,7,,,2.14,7.51,0.2,0.56,437,476,0.52,0.85,6.37,5.52,118,8,9,
"Pyle et al., 2011, NWT OR 2011 09",outcrop,Carcajou 1,,96D,64.733628,-126.80345,Canol,Canol,rock chips,,LP10-94,,77.1,5.44,1.89,0.24,0.9,0.26,1.13,0.28,0.08,<0.01,0.006,99,5,,,15393,,2,7.7,2.5,6.8,2,5.5,45.7,<1,302,0.5,4.4,9.7,194,1.2,60.7,11.3,17.8,33.6,3.91,15.5,2.08,0.5,1.56,0.23,1.33,0.33,1.07,0.17,1.1,0.16,6.05,1.19,49.9,25.5,9.3,103,60.6,14.6,0.1,1.4,0.2,0.3,<0.5,0.13,0.3,6.1,,,1.98,7.66,0.2,0.45,443,482,0.45,0.85,5.96,5.11,129,8,8,
"Pyle et al., 2011, NWT OR 2011 09",outcrop,Carcajou 1,,96D,64.733628,-126.80345,Canol,Canol,rock chips,,LP10-95,,40.03,16.41,0.95,0.63,9.57,0.08,1.84,0.69,0.06,<0.01,0.005,39,12,,,1997,,4,2,5.2,19.3,2.8,8.2,86.7,3,205.1,0.5,18,7.7,508,2.5,78.3,10.3,41.7,74.3,9.04,35.5,5.42,0.77,2.19,0.26,1.39,0.27,0.83,0.13,0.84,0.14,2.68,5.51,11.9,25,37.9,21,16.9,10.2,0.2,1.1,0.3,1.3,2.4,0.88,2.4,18.2,,,,,,,,,,,,,,,,
"Pyle et al., 2011, NWT OR 2011 09",outcrop,Carcajou 2,,96D,64.777094,-126.8240282,Canol,Canol,rock chips,,LP10-96,,72.82,6.1,1.97,1.13,3.55,0.09,1.11,0.23,0.07,0.02,0.007,164,9,,,2115,,2,13.7,3.1,7.3,1.3,4.4,50.8,1,322.4,0.3,3.5,21.7,246,0.7,43.7,39,20.6,31.5,4.62,19.6,4.52,1.08,5.28,0.82,4.43,0.93,2.86,0.41,2.49,0.39,6.68,1.3,68.9,46.8,6.1,243,124.1,13.4,5.8,0.8,<0.1,0.2,<0.5,0.17,0.4,4.6,,,2.52,10.52,0.21,0.28,444,483,0.14,1.1,5.57,4.47,189,3,5,
"Pyle et al., 2011, NWT OR 2011 09",outcrop,Carcajou 2,,96D,64.777094,-126.8240282,Canol,Canol,rock chips,,LP10-97,,72.01,6.34,2.7,0.91,3.61,0.1,1.16,0.27,0.1,0.03,0.008,160,9,,,1654,,2,33.9,2.8,7,1.7,5.5,51,<1,310.8,0.4,4.1,24.8,343,3.3,53.1,47.4,22.2,36.5,5.28,23.2,4.88,1.18,6.12,0.96,5.23,1.13,3.08,0.43,2.52,0.4,6.45,1.53,51.5,55.9,8.7,325,124.9,15.2,8.7,0.8,0.1,0.4,<0.5,0.14,0.1,9.2,,,1.76,9.44,0.21,0.34,446,485,0.19,0.96,5.49,4.53,172,3,6,
"Pyle et al., 2011, NWT OR 2011 09",outcrop,Carcajou 2,,96D,64.777094,-126.8240282,Canol,Canol,rock chips,,LP10-98,,78.53,5.56,1.46,0.87,1.34,0.09,0.99,0.24,0.08,0.01,0.008,169,8,,,1716,,2,11.2,2.5,6.1,1.5,4.5,42.8,<1,206.6,0.3,2.8,18.3,381,5.2,50.6,40.3,18,31.6,4.61,20.8,5.98,1.39,7.22,1.07,5.56,1.11,3.08,0.4,2.42,0.35,6.29,0.87,42.2,77.7,6.6,275,130.8,10,8.1,1,0.1,0.3,<0.5,0.13,0.3,5.3,,,2.44,10.08,0.21,0.26,446,485,0.17,1.07,5.61,4.54,180,3,5,
"Pyle et al., 2011, NWT OR 2011 09",outcrop,Carcajou 2,,96D,64.777094,-126.8240282,Canol,Canol,rock chips,,LP10-99,,77.39,5.42,1.65,0.71,1.27,0.1,0.99,0.26,0.08,0.02,0.007,217,9,,,1973,,2,13.5,2.3,6.6,1.5,4.9,40.3,1,218.7,0.4,4.8,20.9,356,0.7,56.7,39.6,19.1,36.4,5.05,22.2,5.95,1.48,7.11,1.07,5.4,1.14,3.1,0.41,2.44,0.37,7.28,0.98,44.7,110.5,9.2,240,172.4,10.4,7.2,0.8,0.1,0.3,<0.5,0.14,0.1,5.9,,,2.4,11.64,0.22,0.26,444,483,0.21,1.19,6.53,5.34,178,3,4,
"Pyle et al., 2011, NWT OR 2011 09",outcrop,Carcajou 2,,96D,64.777094,-126.8240282,Canol,Canol,rock chips,,LP10-100,,76,7.13,1.65,0.44,0.7,0.16,1.52,0.37,0.06,<0.01,0.007,53,5,,,1962,,1,2.6,3.1,9,2.2,7.1,58.5,2,192.9,0.4,4.4,9.8,211,0.9,74.3,16,21.2,40.5,4.83,18.6,2.58,0.45,1.96,0.33,2.1,0.45,1.55,0.22,1.41,0.22,6.34,0.99,45.7,29,11.8,23,31.5,9.1,0.2,0.7,0.1,0.3,<0.5,0.22,0.2,3.8,,,1.81,9.89,0.22,0.24,439,478,0.23,0.99,6.08,5.09,163,4,4,
"Pyle et al., 2011, NWT OR 2011 09",outcrop,Carcajou 2,,96D,64.777094,-126.8240282,Canol,Canol,rock chips,,LP10-101,,28.46,4.36,2.44,10.9,20.1,0.33,0.83,0.21,0.13,0.12,0.004,134,6,,,1587,,2,42.5,1.8,5.5,1.2,4,31.5,<1,1175,0.3,3.7,24.1,75,0.7,46.5,43.1,15.3,32.5,3.93,16.8,5.35,1.42,7.54,1.17,5.95,1.23,3.32,0.42,2.54,0.37,12.08,1.94,13,48.1,5.5,256,117.1,8.8,6.3,0.5,0.1,0.2,0.6,0.24,0.2,2.9,,,1.03,5.86,0.22,0.5,447,486,0.15,0.6,4.34,3.74,135,3,12,
"Pyle et al., 2011, NWT OR 2011 09",outcrop,Carcajou 2,,96D,64.777094,-126.8240282,Canol,Canol,rock chips,,LP10-102,,57.54,8.98,4.24,2.08,6.39,0.47,2.02,0.44,0.14,0.05,0.01,163,14,,,1688,,2,36.7,3.6,10.8,2.4,8.8,68.7,2,362.5,0.5,7.3,24.8,134,1.8,89.4,53.4,30.4,66.2,7.91,33.5,8.12,1.96,9.76,1.47,7.65,1.55,4.25,0.59,3.39,0.5,8.85,2.91,30.3,109.9,12.5,280,136.5,17.7,9,0.8,0.4,0.3,<0.5,0.29,0.2,7.4,,,1.37,8.61,0.23,0.4,450,489,0.25,0.86,7.06,6.2,122,4,6,
"Pyle et al., 2011, NWT OR 2011 09",outcrop,Carcajou 2,,96D,64.777094,-126.8240282,Canol,Canol,rock chips,,LP10-103,,40.11,4.41,2.27,7,13,0.36,0.93,0.23,0.09,0.12,0.005,39,4,,,12335,,2,4.6,2,6.5,1.4,4.8,40.2,1,941.6,0.3,2.9,6.7,111,0.9,52.4,15.3,16.3,30.7,3.88,14.7,2.35,0.48,2.02,0.3,1.72,0.37,1.1,0.17,1.11,0.18,11.09,1.96,21.2,20.8,8,41,20.9,10.4,1,1,0.2,0.2,<0.5,0.19,0.2,4.1,,,1.53,11.14,0.23,0.48,443,482,0.43,1.09,8.28,7.19,135,5,6,
"Pyle et al., 2011, NWT OR 2011 09",outcrop,Carcajou 2,,96D,64.777094,-126.8240282,Canol,Canol,rock chips,,LP10-104,,74.08,6.17,1.47,0.31,1.46,0.24,1.27,0.3,0.07,<0.01,0.008,58,5,,,2297,,2,1.2,2.6,7.3,1.6,6,48.9,1,153.1,0.4,3.4,11.7,209,1,59.1,11.4,20.1,39,4.78,18.9,2.58,0.41,1.48,0.25,1.4,0.32,1.1,0.18,1.16,0.19,8.35,1.44,53.7,16,13.4,14,25.4,10.4,<0.1,1.5,0.3,0.3,2.6,0.18,0.2,7.4,,,1.8,10.85,0.23,0.57,442,481,0.35,1.09,7.58,6.49,143,5,8,
"Pyle et al., 2011, NWT OR 2011 09",outcrop,Carcajou 2,,96D,64.777094,-126.8240282,Canol,Canol,rock chips,,LP10-105,,78.81,5.15,1.41,0.26,0.62,0.22,1.03,0.25,0.06,<0.01,0.005,50,4,,,2522,,<1,3.9,1.9,6.5,1.4,4.9,43.6,1,165.4,0.4,2.9,9.3,155,0.8,51,10.8,15.6,30.2,3.9,15.1,2.1,0.35,1.39,0.21,1.37,0.32,0.9,0.15,1.01,0.17,6.55,1.11,39.4,21,11.6,23,30.6,6.4,0.3,0.8,0.2,0.2,0.6,0.13,0.2,3.6,,,2.24,8.25,0.24,0.22,433,472,0.29,0.9,6.04,5.14,137,5,4,
"Pyle et al., 2011, NWT OR 2011 09",outcrop,Carcajou 2,,96D,64.777094,-126.8240282,Canol,Canol,rock chips,,LP10-106,,74.79,6.05,2.26,0.31,0.99,0.36,1.24,0.33,0.07,<0.01,0.007,67,5,,,3662,,2,6,2.4,7.7,2,7.2,49.9,1,199.8,0.5,2.8,10.1,182,1,61.1,11.4,18,33,4.38,15.8,2.34,0.43,1.78,0.26,1.34,0.35,1.06,0.17,1.2,0.19,6.63,1.48,51.2,29.7,10.7,46,39.1,11.9,0.3,1.2,0.2,0.2,0.8,0.17,0.2,4.3,,,2.68,7.88,0.24,0.28,432,471,0.33,0.91,6.44,5.53,122,5,4,
"Pyle et al., 2011, NWT OR 2011 09",outcrop,Carcajou 2,,96D,64.777094,-126.8240282,Canol,Canol,rock chips,,LP10-107,,69.2,6.47,3.29,0.48,2.52,0.42,1.34,0.32,0.1,0.01,0.007,116,7,,,7739,,2,12.9,2.5,8.5,1.7,6,52.7,<1,309.5,0.5,5.5,16.6,202,0.9,60,24.2,20.5,38.5,5.04,18.9,3.78,0.79,3.9,0.58,3.3,0.68,1.89,0.26,1.74,0.26,5.52,2.51,41.6,79.1,11.9,121,77.1,14.7,2.9,1.3,0.2,0.3,<0.5,0.17,0.3,6.7,,,2.49,6.03,0.24,0.32,430,469,0.31,0.74,5.34,4.6,113,6,6,
"Pyle et al., 2011, NWT OR 2011 09",outcrop,Carcajou 2,,96D,64.777094,-126.8240282,Canol,Canol,rock chips,,LP10-108,,70.84,7.04,2.28,0.49,1.5,0.4,1.47,0.36,0.06,<0.01,0.008,101,6,,,2822,,2,10.4,2.7,8.7,2,6.6,58.5,1,180.9,0.5,5,13,279,1,66,16.2,19.9,38.1,4.91,18.7,3.02,0.61,2.74,0.38,2.44,0.48,1.44,0.2,1.37,0.2,6.14,1.99,39.3,41.9,10.8,71,62.7,9.6,0.8,1.1,0.2,0.3,0.6,0.14,0.3,5.1,,,1.67,5.75,0.25,0.31,427,466,0.34,0.65,5.97,5.32,96,6,5,
"Pyle et al., 2011, NWT OR 2011 09",outcrop,Carcajou 2,,96D,64.777094,-126.8240282,Canol,Canol,rock chips,,LP10-109,,68.38,8.58,3.56,0.94,1.77,0.49,1.76,0.44,0.1,0.02,0.008,91,8,,,2458,,2,18,3.4,11.7,2.3,7.7,72.5,2,240.9,0.5,6.4,18.5,225,0.9,83,21.4,25.8,49.5,6.09,23.2,3.61,0.73,3.33,0.5,2.71,0.61,1.8,0.28,1.83,0.28,6.63,2.54,42.8,64.1,15.8,87,51.1,14.3,1.2,1.5,0.3,0.4,<0.5,0.25,0.3,7.5,,,1.85,8.75,0.25,0.26,444,483,0.19,0.9,5.81,4.91,151,3,4,
"Pyle et al., 2011, NWT OR 2011 09",outcrop,Carcajou 2,,96D,64.777094,-126.8240282,Canol,Canol,rock chips,,LP10-110,,68.96,8.61,2.84,0.55,1.13,0.37,1.82,0.44,0.07,<0.01,0.009,70,7,,,4558,,2,12.3,3.6,10,2.5,8.3,69.7,1,186.3,0.7,5.3,14,174,1.1,82.8,16.1,23.3,46.5,5.69,21.1,3.36,0.65,2.66,0.41,2.37,0.51,1.47,0.23,1.6,0.24,5.21,2.18,25.3,46.3,17.2,74,50.9,10.1,0.8,1,0.3,0.5,<0.5,0.28,0.4,5.1,,,1.28,3.98,0.25,0.33,425,464,0.33,0.47,5.18,4.71,77,6,6,
"Pyle et al., 2011, NWT OR 2011 09",outcrop,Carcajou 2,,96D,64.777094,-126.8240282,Canol,Canol,rock chips,,LP10-111,,73.75,6.91,2.35,0.71,1.57,0.4,1.41,0.35,0.07,0.02,0.007,92,6,,,8862,,1,13.3,3,8.3,1.9,6.1,55.1,2,339.8,0.5,4.9,11.5,179,1,62.4,17,21.7,41.3,5.43,19.6,3.3,0.66,2.81,0.42,2.46,0.47,1.44,0.2,1.36,0.2,5.77,1.93,31.9,37.3,14.5,96,61.2,11.6,1.2,1.4,0.2,0.5,<0.5,0.2,0.2,6.7,,,0.89,1.87,0.26,0.16,426,465,0.21,0.25,3.56,3.31,53,6,4,
"Pyle et al., 2011, NWT OR 2011 09",outcrop,Carcajou 2,,96D,64.777094,-126.8240282,Canol,Canol,rock chips,,LP10-112,,67.86,10.42,3.04,0.76,1.27,0.51,2.18,0.54,0.08,<0.01,0.01,82,10,,,2075,,3,13.9,4.8,13,2.9,9.5,91.5,2,171.1,0.7,7.7,14.7,206,1.3,104.3,20.3,28.1,57.5,6.86,24.8,3.81,0.74,3.15,0.51,2.81,0.66,2.03,0.3,2.05,0.3,6.16,1.91,34.4,58,18.7,73,53.7,10.1,1.4,1,0.4,0.4,0.6,0.21,0.2,6.4,,,0.69,6.83,0.26,0.19,453,492,0.15,0.64,5.67,5.03,120,3,3,
"Pyle et al., 2011, NWT OR 2011 09",outcrop,Carcajou 2,,96D,64.777094,-126.8240282,Canol,Canol,rock chips,,LP10-113,,69.9,9.58,4.04,0.48,0.3,0.46,1.99,0.52,0.1,<0.01,0.009,124,9,,,2313,,2,31.7,4,11.3,3,9.5,83.8,2,145.6,0.7,8.4,20.6,208,1.1,100.1,17.4,28.9,58.1,6.98,27,3.92,0.74,3.18,0.49,2.85,0.59,1.74,0.27,1.79,0.28,6.25,3.12,51.4,91.9,24.2,119,91.3,22.9,1.7,1.4,0.4,0.5,0.6,0.26,0.4,8.3,,,1.39,8.49,0.26,0.15,449,488,0.12,0.84,5.8,4.96,146,2,3,
"Pyle et al., 2011, NWT OR 2011 09",outcrop,Carcajou 2,,96D,64.777094,-126.8240282,Canol,Canol,rock chips,,LP10-114,,67.28,8.99,4.18,0.7,2.23,0.34,1.85,0.47,0.09,0.01,0.009,97,10,,,16731,,2,19.8,4.2,10.5,3.1,8.3,78.2,1,386.4,0.6,7.9,13.2,188,0.8,92.4,21.5,24.3,49.1,5.83,21.7,3.92,0.8,3.71,0.55,3.17,0.66,1.92,0.27,1.91,0.28,4.59,3.12,31.8,84.1,16.3,120,75.9,18.2,2.5,1,0.3,0.3,<0.5,0.19,0.4,6.3,,,0.93,5.34,0.27,0.18,455,494,0.13,0.54,3.98,3.44,134,3,5,
"Pyle et al., 2011, NWT OR 2011 09",outcrop,Carcajou 2,,96D,64.777094,-126.8240282,Canol,Canol,rock chips,,LP10-115,,73.38,8.08,3.19,0.42,1.13,0.33,1.65,0.45,0.08,<0.01,0.007,79,7,,,4262,,<1,14.2,3.6,10,2.7,7.7,70,2,201.4,0.5,6.8,9.1,207,0.6,96.4,17.3,21.2,44.5,5.35,19.7,3.14,0.51,2.3,0.39,2.5,0.54,1.46,0.24,1.43,0.24,4.63,2.58,27.6,57.8,17.4,79,62.8,17.5,1,1.4,0.3,0.5,<0.5,0.28,0.6,7.1,,,1.64,7.02,0.27,0.18,442,481,0.13,0.74,4.44,3.7,158,3,4,
"Pyle et al., 2011, NWT OR 2011 09",outcrop,Carcajou 2,,96D,64.777094,-126.8240282,Canol,Canol,rock chips,,LP10-116,,71.93,9.01,3.82,0.47,0.44,0.35,1.89,0.49,0.08,<0.01,0.008,41,7,,,5262,,2,7.4,3.5,10.6,3.3,8.7,74.9,2,187.7,0.8,6.4,8.7,131,0.9,104.7,14.8,25.5,52.8,6.06,22.3,2.89,0.39,1.86,0.32,2.01,0.47,1.51,0.24,1.64,0.26,4.48,1.87,38.3,38.7,16.7,27,33.5,19.3,0.1,0.8,0.3,0.4,<0.5,0.4,0.3,5.8,,,1.65,6.26,0.27,0.17,448,487,0.17,0.68,4.28,3.6,146,4,4,
"Pyle et al., 2011, NWT OR 2011 09",outcrop,Carcajou 2,,96D,64.777094,-126.8240282,Canol,Canol,rock chips,,LP10-117,,74.45,8.25,2.85,0.43,0.35,0.39,1.78,0.42,0.07,<0.01,0.008,62,7,,,4040,,1,8.9,3.7,10.3,2.7,8.3,75.5,2,161.7,0.5,6.2,11.4,178,0.8,87.8,14.6,23.1,46.9,5.53,19.8,2.82,0.43,1.82,0.32,1.85,0.45,1.4,0.24,1.6,0.24,4.68,1.92,40.5,45.6,15.5,29,50,17.7,0.2,0.9,0.3,0.3,<0.5,0.27,0.5,5.6,,,1.24,5.7,0.28,0.29,443,482,0.25,0.61,4.43,3.82,129,6,7,
"Pyle et al., 2011, NWT OR 2011 09",outcrop,Carcajou 2,,96D,64.777094,-126.8240282,Canol,Canol,rock chips,,LP10-118,,75.19,9.1,1.99,0.49,0.09,0.41,1.94,0.43,0.06,<0.01,0.008,41,8,,,3208,,2,3.7,3.9,11.6,2.7,8.4,80.3,2,148.6,0.6,6.7,10.2,174,0.9,90.6,16.1,25.4,49.2,5.84,21.1,2.91,0.47,1.9,0.33,2.17,0.49,1.5,0.23,1.66,0.24,4.85,1.08,37,30.4,13.6,17,31,13.8,<0.1,1,0.2,0.3,<0.5,0.3,0.2,4.1,,,1.34,7.25,0.28,0.21,445,484,0.16,0.73,4.56,3.83,159,4,5,
"Pyle et al., 2011, NWT OR 2011 09",outcrop,Carcajou 2,,96D,64.777094,-126.8240282,Canol,Canol,rock chips,,LP10-119,,80.34,4.86,0.86,0.57,0.72,0.29,0.97,0.23,0.03,<0.01,0.004,34,4,,,3093,,<1,1.7,2.2,6.2,1.2,4.1,39.5,1,124.5,0.3,3.4,8.5,195,0.6,41.5,9.9,15.5,27.3,3.72,14.2,2,0.25,1.08,0.17,1.15,0.25,0.75,0.13,0.83,0.13,7.18,0.63,46.1,13,7.7,11,17.9,6.5,<0.1,0.9,0.2,0.2,<0.5,0.2,<0.1,3.6,,,1.05,6.76,0.28,0.27,448,487,0.15,0.67,4.12,3.45,164,4,7,
"Pyle et al., 2011, NWT OR 2011 09",outcrop,Carcajou 2,,96D,64.777094,-126.8240282,Canol,Canol,rock chips,,LP10-120,,82.05,5.22,0.69,0.29,0.06,0.2,1.08,0.25,0.04,<0.01,0.007,44,5,,,3884,,1,0.4,2.4,6.6,1.3,4.2,47.4,1,137,0.3,3.7,8.8,435,0.6,45.3,9.7,18,29.8,4.45,17.5,2.39,0.33,1.38,0.17,1.15,0.24,0.71,0.12,0.86,0.12,6.38,0.47,40,5.3,6.1,3,14.8,7.5,<0.1,1.3,0.1,0.3,<0.5,0.16,0.2,5.9,,,1.71,12.3,0.29,0.29,441,480,0.31,1.19,6.54,5.35,188,5,4,
"Pyle et al., 2011, NWT OR 2011 09",outcrop,Carcajou 2,,96D,64.777094,-126.8240282,Canol,Canol,rock chips,,LP10-121,,83.33,3.99,0.75,0.21,0.09,0.16,0.82,0.19,0.03,<0.01,0.005,48,4,,,3619,,1,2.1,1.7,4.9,0.8,3.3,35.3,<1,128,0.3,3,7,449,0.6,33.3,6.9,12.6,21.6,3.1,12.2,1.59,0.22,0.89,0.11,0.78,0.16,0.58,0.09,0.55,0.09,5.2,0.55,38.6,31.3,5.9,27,26,7.7,0.3,1.2,0.1,0.2,<0.5,0.09,0.1,5,,,1.84,8.81,0.29,0.27,442,481,0.29,0.91,4.72,3.81,187,6,6,
"Pyle et al., 2011, NWT OR 2011 09",outcrop,Carcajou 2,,96D,64.777094,-126.8240282,Canol,Canol,rock chips,,LP10-122,,79.31,7.69,0.86,0.5,0.09,0.24,1.69,0.42,0.05,<0.01,0.011,35,7,,,3378,,2,0.9,3.8,10.3,1.8,6.7,72.4,2,164,0.5,5.6,8.9,1005,0.7,75.1,15.7,24.8,43.7,5.85,20.6,3.34,0.49,2.11,0.28,1.87,0.41,1.23,0.19,1.43,0.21,4.6,0.44,30.1,11.5,9.6,3,16.3,10.6,<0.1,2.2,0.2,0.4,<0.5,0.19,0.3,8.2,,,1.35,7.42,0.3,0.25,443,482,0.29,0.76,4.23,3.47,175,7,6,
"Pyle et al., 2011, NWT OR 2011 09",outcrop,Carcajou 2,,96D,64.777094,-126.8240282,Canol,Canol,rock chips,,LP10-123,,54.91,6.29,1.81,5.38,8.17,0.55,1.34,0.34,0.08,0.06,0.007,27,7,,,4122,,2,3.9,2.5,7.4,2.3,6.2,53.3,<1,518.9,0.3,3.4,7.9,123,1,75.3,21.6,22,40.9,4.96,20,2.99,0.6,3.01,0.46,2.67,0.61,1.7,0.27,1.73,0.26,9.87,1.27,17.4,22.4,6.9,36,18.7,10.2,0.6,0.6,0.2,0.2,<0.5,0.18,<0.1,4.2,,,1.02,11.36,0.3,0.25,450,489,0.25,1.05,7.31,6.26,155,3,3,
"Pyle et al., 2011, NWT OR 2011 09",outcrop,Carcajou 2,,96D,64.777094,-126.8240282,Canol,Canol,rock chips,,LP10-124,,79.03,6.18,0.68,0.38,0.23,0.23,1.19,0.28,0.04,<0.01,0.007,33,5,,,3516,,2,1,3.1,7.2,1.6,5.2,52.9,<1,132.3,0.3,4.6,11.5,277,0.6,59.1,10.7,21.5,37.5,5.52,21.4,3.4,0.58,2.21,0.24,1.3,0.28,0.93,0.14,1.1,0.15,7.34,0.8,27.7,11.5,7.2,5,12.6,7.6,<0.1,0.9,0.2,0.3,<0.5,0.27,0.1,9.5,,,1.45,11.59,0.3,0.21,449,488,0.24,1.11,6.5,5.39,178,4,3,
"Pyle et al., 2011, NWT OR 2011 09",outcrop,Carcajou 2,,96D,64.777094,-126.8240282,Canol,Canol,rock chips,,LP10-125,,88.42,2.6,0.68,0.15,0.08,0.11,0.47,0.12,0.03,<0.01,0.003,50,3,,,2809,,1,1.7,1,3.3,0.6,2,20.7,<1,89.3,0.2,1.4,7.4,451,<0.5,24.5,6.8,10.7,16.5,2.63,10.9,1.66,0.26,0.98,0.11,0.63,0.15,0.48,0.08,0.55,0.09,4.26,0.47,28.3,9.4,2.8,17,19.1,7,0.2,0.9,<0.1,0.2,<0.5,0.08,0.4,3.4,,,1.61,12.04,0.31,0.2,447,486,0.21,1.15,6.14,4.99,196,3,3,
"Pyle et al., 2011, NWT OR 2011 09",outcrop,Carcajou 2,,96D,64.777094,-126.8240282,Canol,Canol,rock chips,,LP10-126,,84.29,4.24,0.66,0.28,0.26,0.18,0.72,0.18,0.05,<0.01,0.005,51,4,,,2747,,<1,1.2,2,5.3,1,3.6,36.6,1,89.3,0.3,2.7,9.1,445,<0.5,37.7,7.2,13.7,22.8,3.29,13.3,1.84,0.26,0.98,0.12,0.84,0.18,0.57,0.11,0.73,0.12,5.67,0.53,35.7,12.5,5.7,8,21.2,8.4,<0.1,1.2,0.1,0.2,<0.5,0.14,0.3,4.3,,,1.82,11.62,0.31,0.24,444,483,0.27,1.14,5.6,4.46,208,5,4,
"Pyle et al., 2011, NWT OR 2011 09",outcrop,Carcajou 2,,96D,64.777094,-126.8240282,Canol,Canol,rock chips,,LP10-127,,79.48,7.08,0.61,0.48,0.13,0.19,1.25,0.28,0.03,<0.01,0.007,38,5,,,2293,,1,0.6,4,8.4,1.4,4.6,62.3,1,73.1,0.4,3.9,9.2,424,0.7,47.9,8,17,30,4.04,16.2,2.14,0.32,1.31,0.13,1.02,0.23,0.69,0.13,0.98,0.14,6.16,0.56,19.6,7,7.1,4,14.8,7.8,<0.1,0.8,0.2,0.2,<0.5,0.2,0.4,5.2,,,0.97,9.39,0.31,0.33,443,482,0.41,0.9,5.64,4.74,166,7,6,
"Pyle et al., 2011, NWT OR 2011 09",outcrop,Carcajou 2,,96D,64.777094,-126.8240282,Canol,Canol,rock chips,,LP10-128,,73.51,9.41,2.07,0.66,0.14,0.28,1.73,0.36,0.06,<0.01,0.009,29,8,,,2948,,2,1.1,5.1,12.4,2.2,5.6,85.5,2,119.2,0.4,4.4,10.1,298,0.7,62.9,12.6,22.4,42.8,5.53,21,3.16,0.58,2.05,0.26,1.52,0.37,1.21,0.2,1.41,0.22,5.98,0.79,19.3,12.9,10.8,17,15.7,15.6,0.1,0.8,0.2,0.3,<0.5,0.31,0.3,6.8,,,0.64,8.2,0.32,0.46,446,485,0.42,0.77,5.64,4.87,145,7,8,
"Pyle et al., 2011, NWT OR 2011 09",outcrop,Carcajou 2,,96D,64.777094,-126.8240282,Canol,Canol,rock chips,,LP10-129,,80.77,6.63,1.43,0.45,0.13,0.19,1.21,0.29,0.04,<0.01,0.008,39,6,,,2451,,2,1.5,3.8,7.8,1.3,4.7,58.6,2,84.8,0.3,4.1,8.7,922,0.6,51,11.9,17,30.5,4.08,16.7,2.5,0.45,1.63,0.21,1.26,0.32,1.07,0.16,1.31,0.18,4.32,0.46,29.7,17.2,7.8,17,18.6,12.9,<0.1,1.8,0.2,0.4,<0.5,0.14,0.4,5.9,,,0.71,5.93,0.32,0.33,448,487,0.25,0.58,3.73,3.15,159,7,9,
"Pyle et al., 2011, NWT OR 2011 09",outcrop,Carcajou 2,,96D,64.777094,-126.8240282,Canol,Canol,rock chips,,LP10-130,,79.75,6.59,1,0.42,0.19,0.27,1.19,0.32,0.03,<0.01,0.008,49,6,,,3004,,1,1.4,3.6,8.3,1.7,5.4,52.4,1,114.8,0.3,4.2,13.3,414,0.6,59.3,11.5,18,33,4.33,16.2,2.85,0.46,1.62,0.23,1.43,0.32,1.09,0.17,1.3,0.19,5.81,0.6,31,10.9,7.4,6,22.6,10.5,<0.1,1.2,0.2,0.3,<0.5,0.21,0.3,6.2,,,0.93,8.47,0.32,0.27,447,486,0.31,0.82,5.2,4.38,163,6,5,
"Pyle et al., 2011, NWT OR 2011 09",outcrop,Carcajou 2,,96D,64.777094,-126.8240282,Canol,Canol,rock chips,,LP10-131,,74.52,10.22,1.42,0.83,0.34,0.31,1.91,0.44,0.06,<0.01,0.011,48,10,,,2579,,2,3.4,6.3,12.8,2.6,7.2,94.7,2,145.9,0.5,6.7,10.9,458,0.9,84.3,17.6,24,45.9,5.96,22.7,3.85,0.79,2.85,0.38,2.25,0.5,1.53,0.26,1.74,0.27,4.65,0.76,19.5,23.6,8,33,29.4,12.4,0.3,0.8,0.2,0.3,<0.5,0.2,0.5,5.3,,,0.64,7.14,0.33,0.26,447,486,0.27,0.67,4.56,3.89,157,6,6,
"Pyle et al., 2011, NWT OR 2011 09",outcrop,Carcajou 2,,96D,64.777094,-126.8240282,Canol,Canol,rock chips,,LP10-132,,73.51,11.55,1.46,0.82,0.29,0.22,2.16,0.46,0.05,<0.01,0.011,41,10,,,2475,,2,2.2,6.8,14.7,2.6,7.1,106.9,2,120.9,0.5,7.1,8,670,0.7,77.9,13.3,23.7,44.6,5.54,21,3.4,0.61,2.25,0.29,1.75,0.39,1.3,0.23,1.56,0.24,3.55,0.45,19,14.2,10.2,15,24.3,11.7,<0.1,0.5,0.2,0.3,<0.5,0.12,0.7,5.1,,,0.49,5.13,0.33,0.21,444,483,0.22,0.49,3.23,2.74,159,7,7,
"Pyle et al., 2011, NWT OR 2011 09",outcrop,Carcajou 2,,96D,64.777094,-126.8240282,Canol,Canol,rock chips,,LP10-133,,65.9,14.1,1.83,0.94,0.16,0.29,2.59,0.51,0.05,<0.01,0.012,57,13,,,28442,,3,2.9,9.2,16.7,2.3,7.9,127.1,2,274.1,0.6,8.4,12.1,313,1,81.7,13.7,27.3,53.4,6.32,25.8,4.17,0.74,2.83,0.32,1.83,0.42,1.3,0.22,1.59,0.24,3.77,1.16,17.2,17.5,9.9,14,21.6,11.8,<0.1,0.3,0.2,0.3,<0.5,0.17,0.8,4.5,,,0.66,5.91,0.33,0.31,442,481,0.25,0.57,3.69,3.12,160,7,8,
"Pyle et al., 2011, NWT OR 2011 09",outcrop,Carcajou 2,,96D,64.777094,-126.8240282,Canol,Canol,rock chips,,LP10-134,,66.39,15.79,1.63,1.13,0.23,0.29,3.01,0.58,0.05,<0.01,0.013,44,13,,,4317,,2,3.1,10.1,18.6,3,8.9,151.3,3,162.4,0.6,9.6,8.4,362,1.1,94.5,13.9,29.9,58.9,6.82,26.3,4.3,0.71,2.41,0.3,1.78,0.41,1.34,0.21,1.59,0.24,3.4,0.54,12.4,16.4,9.3,24,20.5,7.9,<0.1,0.3,0.2,0.2,<0.5,0.1,0.8,4.5,,,0.25,4.44,0.34,0.27,444,483,0.28,0.42,3.25,2.83,137,9,8,
"Pyle et al., 2011, NWT OR 2011 09",outcrop,Carcajou 2,,96D,64.777094,-126.8240282,Canol,Canol,rock chips,,LP10-135,,63.17,18.1,1.93,1.27,0.23,0.26,3.48,0.66,0.06,<0.01,0.014,41,15,,,2252,,2,3.5,11.9,22.5,3.1,10,173.9,3,137.4,0.7,9.9,7.6,333,1.2,98.3,15.5,31.3,61.3,6.98,25.4,4.26,0.75,2.58,0.37,2.08,0.46,1.48,0.27,1.76,0.27,2.81,0.45,8.8,22.3,9.7,37,21.4,8.5,<0.1,0.2,0.2,0.2,<0.5,0.12,0.8,3.7,,,0.32,3.44,0.34,0.29,443,482,0.24,0.33,2.66,2.33,129,9,11,
"Pyle et al., 2011, NWT OR 2011 09",outcrop,Carcajou 2,,96D,64.777094,-126.8240282,Canol,Canol,rock chips,,LP10-136,,62.31,17.49,3.39,1.31,0.24,0.31,3.44,0.72,0.08,<0.01,0.017,52,16,,,2564,,2,4.6,11.5,21.7,3.2,10.4,165.3,3,153.7,0.7,10.6,7.2,526,1.3,116.6,19.3,33.1,66.7,7.51,27.3,4.74,0.84,3.1,0.47,2.66,0.63,1.82,0.31,2.16,0.33,2.47,0.44,12.2,34,11.8,61,27.6,12.9,0.2,0.3,0.2,0.2,<0.5,0.1,0.9,3.2,,,0.41,3.19,0.34,0.37,446,485,0.24,0.33,2.67,2.34,119,9,14,
"Pyle et al., 2011, NWT OR 2011 09",outcrop,Carcajou 2,,96D,64.777094,-126.8240282,Canol,Canol,rock chips,,LP10-137,,61.96,16.96,4.59,1.26,0.28,0.28,3.29,0.68,0.09,<0.01,0.015,38,16,,,2660,,3,3.5,10.2,19.9,3.2,9.5,160.4,3,162.1,0.7,9.5,5.4,500,1.2,107.1,18.3,30.8,62.4,6.81,24,3.82,0.69,2.37,0.41,2.43,0.58,1.78,0.29,2.06,0.3,2.04,0.48,10.1,38.2,11.2,54,22.5,13.8,0.5,0.4,0.2,0.2,<0.5,0.09,0.9,3.4,,,0.17,1.98,0.35,0.49,444,483,0.27,0.21,2.18,1.97,91,12,22,
"Pyle et al., 2011, NWT OR 2011 09",outcrop,Carcajou 2,,96D,64.777094,-126.8240282,Canol,Canol,rock chips,,LP10-138,,70.54,13.61,1.88,0.96,0.14,0.32,2.62,0.64,0.06,<0.01,0.013,41,12,,,2165,,2,2.8,7.9,16.7,3,9.3,122.5,3,123.9,0.7,9,6.2,655,1,104.5,17.8,28.7,57.3,6.49,24.8,4.06,0.72,2.72,0.4,2.42,0.54,1.74,0.28,1.93,0.3,2.9,0.61,13,29.1,12,47,29.3,12.8,0.2,2.2,0.3,0.4,4.6,0.15,0.8,4.8,,,0.56,4.14,0.35,0.14,450,489,0.13,0.4,2.81,2.41,147,5,5,
"Pyle et al., 2011, NWT OR 2011 09",outcrop,Carcajou 2,,96D,64.777094,-126.8240282,Canol,Canol,rock chips,,LP10-139,,65.94,11.88,5.63,1.54,0.37,0.32,2.31,0.56,0.09,0.04,0.011,111,13,,,2112,,2,13.4,6.5,14.7,2.8,8.7,103.4,2,130.7,0.6,7.7,9,533,0.9,96.1,23.9,26.8,53.9,6.22,23.6,4.2,0.89,3.86,0.64,3.63,0.74,2.05,0.32,2.12,0.34,3.83,1.78,27.1,52.9,12.2,173,84.3,20.7,1.4,1.7,0.2,0.4,1.8,0.15,0.8,7.4,,,0.89,2.89,0.35,0.44,456,495,0.27,0.36,2.35,1.99,123,11,19,
"Pyle et al., 2011, NWT OR 2011 09",outcrop,Carcajou 2,,96D,64.777094,-126.8240282,Canol,Canol,rock chips,,LP10-140,,71.86,11.25,2.57,0.93,0.43,0.33,2.23,0.56,0.08,<0.01,0.011,78,11,,,2446,,2,7.9,6.2,15.2,2.5,8.4,106.7,3,139.3,0.8,7.7,7.9,672,1.1,101.4,20,25.5,49.9,6.18,23.4,3.83,0.72,2.79,0.47,2.71,0.6,1.93,0.27,1.93,0.31,3.58,1,22.7,51.8,10.2,88,53.3,15,0.8,2,0.2,0.5,2.1,0.13,1,5.7,,,1.01,5.11,0.36,0.39,452,491,0.17,0.53,3.36,2.83,152,5,12,
"Gal and Pyle, 2012, NWT OR 2012 009",well,Carcajou L-24,300L246540128450,106H,65.559478,-128.8408423,Canol,,rock chips,917.6829268,"CARCAJOU L-24-3010			",,59.81,16.65,6.95,1.89,0.74,0.64,2.99,0.84,0.15,0.06,0.018,75,18,9,99.74,857,,<1,18.6,8.1,19.9,4.5,12.4,128.2,2,196.3,0.8,12.2,3.5,246,1.3,161.6,29.3,38.6,74.1,8.51,30.9,5.78,1.29,5.29,0.88,4.99,0.97,3.18,0.45,2.97,0.49,1.66,0.47,0.7,40.1,16.7,180,46.8,8.6,0.2,0.2,0.3,<0.1,2.5,0.18,0.1,<0.5,,70.5,0.17,0.63,0.21,0.33,460,499,0.29,0.09,0.85,0.76,74,34,39,0.7
"Gal and Pyle, 2012, NWT OR 2012 009",well,Carcajou L-24,300L246540128450,106H,65.559478,-128.8408423,Canol,,rock chips,923.7804878,"CARCAJOU L-24-3030			",,56.93,17.64,7.04,1.9,0.89,0.5,3.27,0.84,0.14,0.05,0.016,73,20,10.5,99.72,986,,2,19.3,9.2,20.7,3.7,11.6,142.5,2,205.4,0.8,12,3.9,281,1.3,141.8,27.5,37.9,73.5,8.34,32,5.97,1.23,5.12,0.8,4.69,0.96,2.88,0.44,2.98,0.41,1.98,0.64,0.9,46.2,20.3,187,51.5,8.1,0.3,0.3,0.3,<0.1,1.9,0.24,0.2,1.1,,70.3,0.19,0.64,0.23,0.32,462,501,0.02,0.1,0.92,0.82,70,2,35,0.9
"Gal and Pyle, 2012, NWT OR 2012 009",well,Carcajou L-24,300L246540128450,106H,65.559478,-128.8408423,Ramparts,,rock chips,929.8780488,"CARCAJOU L-24-3050			",,31.01,8.75,6.56,2.41,23.9,0.26,1.61,0.43,0.15,0.05,0.008,59,10,24.5,99.67,1289,,1,13,4.4,10.6,2.5,6.4,68.2,1,467,0.4,6.6,3.5,139,0.6,87.9,20.8,24.5,43.1,5.16,17.6,3.89,0.81,3.53,0.57,3.05,0.61,1.81,0.28,1.65,0.28,6.85,2.36,4.9,31.5,15.8,203,44.3,95.4,1.6,2.8,0.2,0.2,2.6,1.11,1.8,3.8,,70.6,0.31,0.87,0.26,0.3,456,495,0.23,0.12,1.02,0.9,85,23,29,5.7
"Gal and Pyle, 2012, NWT OR 2012 009",well,Carcajou L-24,300L246540128450,106H,65.559478,-128.8408423,Ramparts,,rock chips,935.9756098,"CARCAJOU L-24-3070			",,19.89,3.19,2.77,1.36,38.56,0.12,0.63,0.16,0.06,0.02,0.004,25,4,33.1,99.82,178,,<1,4.4,1.8,3.9,1,2.5,26.3,<1,880,0.2,2.7,1.1,50,<0.5,34.1,10.6,12.6,19.3,2.34,9.2,1.74,0.38,1.49,0.25,1.33,0.29,0.87,0.12,0.71,0.11,9.45,0.91,2,9.9,4.1,31,11.2,43.8,0.2,1.9,<0.1,<0.1,3.1,0.44,0.4,1.3,,70.1,0.22,0.4,0.35,0.24,455,494,0.08,0.07,0.59,0.52,68,14,41,9
"Gal and Pyle, 2012, NWT OR 2012 009",well,Carcajou L-24,300L246540128450,106H,65.559478,-128.8408423,Ramparts,,rock chips,1076.219512,"CARCAJOU L-24-3530			",,45.27,14.24,6.41,2.56,11.27,0.49,2.49,0.63,0.16,0.05,0.012,54,14,16.2,99.79,467,,<1,20.5,7.2,17.2,3.7,12.1,113,2,305.9,0.7,10.7,2.7,177,1.5,125.2,24.3,34.3,67.2,7.61,25.8,5.54,1.13,4.68,0.75,4.17,0.87,2.5,0.37,2.42,0.37,3.91,0.46,0.6,34.5,21.9,95,39.8,8.3,0.1,0.2,0.2,0.1,0.8,0.22,<0.1,0.7,,70.9,0.13,0.54,0.19,0.33,454,493,0.18,0.08,1.04,0.96,52,17,32,1.3
"Gal and Pyle, 2012, NWT OR 2012 009",well,Carcajou L-24,300L246540128450,106H,65.559478,-128.8408423,Ramparts,,rock chips,1149.390244,"CARCAJOU L-24-3770			",,7.67,0.72,0.43,1.23,49.36,0.03,0.15,0.03,0.01,<0.01,<0.002,<20,<1,40.1,99.76,183,,<1,0.4,0.3,0.7,0.3,0.3,6.2,<1,1211.1,0.1,0.5,0.9,10,<0.5,7.9,3.6,2.9,4.1,0.51,1.8,0.34,0.06,0.54,0.06,0.43,0.08,0.17,0.03,<0.05,0.03,11.62,0.07,0.4,2.6,1.1,8,3.4,0.7,<0.1,0.1,<0.1,<0.1,1,0.05,<0.1,<0.5,,70.6,0.19,0.4,0.33,0.26,468,507,0.08,0.06,0.57,0.51,70,14,46,9.8
"Gal and Pyle, 2012, NWT OR 2012 009",well,Carcajou L-24,300L246540128450,106H,65.559478,-128.8408423,Hare Indian,Bell Creek,rock chips,1198.170732,"CARCAJOU L-24-3930			",,11.14,2.3,1.86,1.17,45.59,0.1,0.5,0.14,0.02,0.03,0.004,<20,3,36.9,99.8,54,,1,1.6,0.8,2.5,0.8,3.5,18.3,<1,972.5,<0.1,2.1,0.8,11,<0.5,39.9,10.1,9.1,17.7,2.16,8.7,1.73,0.31,1.55,0.23,1.46,0.3,0.81,0.1,0.9,0.12,10.46,0.83,0.4,4.6,7.4,21,6.2,6.1,0.1,<0.1,<0.1,<0.1,0.6,0.17,<0.1,<0.5,,70.1,0.28,0.7,0.28,0.34,462,501,0.59,0.12,1.01,0.89,69,58,34,6
"Gal and Pyle, 2012, NWT OR 2012 009",well,Carcajou L-24,300L246540128450,106H,65.559478,-128.8408423,Hare Indian,Bell Creek,rock chips,1228.658537,"CARCAJOU L-24-4030			",,31.85,3.45,1.55,1.49,31.94,0.36,0.73,0.3,0.03,0.03,0.004,<20,4,28.1,99.8,102,,<1,3.3,1.5,3.9,4.4,4.2,29.8,<1,978,0.3,5.2,1.4,27,<0.5,155.2,18,20.2,39.8,4.57,18.8,3.23,0.58,2.88,0.47,2.8,0.58,1.76,0.26,1.72,0.25,7.73,0.27,0.3,4.4,6.6,18,7.3,2.2,<0.1,<0.1,<0.1,<0.1,<0.5,0.04,<0.1,<0.5,,70.7,0.07,0.13,0.33,0.21,462,501,0.2,0.04,0.2,0.16,65,100,105,7.7
"Gal and Pyle, 2012, NWT OR 2012 009",well,Carcajou L-24,300L246540128450,106H,65.559478,-128.8408423,Hare Indian,Bell Creek,rock chips,1259.146341,"CARCAJOU L-24-4130			",,32.69,3.74,1.74,1.6,30.85,0.42,0.81,0.31,0.04,0.03,0.005,<20,4,27.5,99.76,146,,<1,4.3,1.8,4.9,4,5.1,32.5,<1,1253.2,0.3,5.2,1.4,28,0.6,149.1,18.4,20.4,40.8,4.67,18.1,3.17,0.65,2.92,0.48,2.72,0.61,1.67,0.27,1.61,0.26,7.67,0.24,0.1,4.4,7.3,19,7.9,2.4,<0.1,<0.1,<0.1,<0.1,<0.5,0.08,<0.1,<0.5,,70.6,0.07,0.1,0.41,0.21,460,499,0.04,0.02,0.19,0.17,53,21,111,7.8
"Gal and Pyle, 2012, NWT OR 2012 009",well,Carcajou L-24,300L246540128450,106H,65.559478,-128.8408423,Hare Indian,Bell Creek,rock chips,1289.634146,"CARCAJOU L-24-4230			",,31.16,3.86,1.57,1.62,31.87,0.44,0.78,0.31,0.04,0.03,0.004,<20,4,28,99.73,204,,<1,3.8,1.7,4.5,4.3,4.9,33,<1,1647.9,0.4,5.4,1.5,29,0.5,149.6,18.8,20.1,39.8,4.58,18.4,3.23,0.59,3.05,0.49,2.85,0.59,1.74,0.26,1.66,0.27,7.74,0.25,0.1,4.9,6.7,19,7.3,1.6,<0.1,<0.1,<0.1,<0.1,<0.5,0.06,<0.1,<0.5,,70.2,0.08,0.15,0.34,0.37,461,500,0.04,0.03,0.19,0.16,79,21,195,8
"Gal and Pyle, 2012, NWT OR 2012 009",well,Carcajou L-24,300L246540128450,106H,65.559478,-128.8408423,Hare Indian,Bell Creek,rock chips,1320.121951,"CARCAJOU L-24-4330			",,26.76,4.07,1.79,1.76,33.82,0.41,0.84,0.3,0.03,0.03,0.005,<20,4,29.8,99.67,193,,1,4.6,2,5.3,3.1,4.5,37.7,<1,1874.6,0.3,5,1.3,30,0.6,121.1,18,19.3,40.5,4.63,17,3.15,0.62,3.04,0.48,2.61,0.55,1.56,0.24,1.78,0.23,8.2,0.31,0.5,5.5,6.8,19,8.6,1.9,<0.1,<0.1,<0.1,<0.1,<0.5,0.08,<0.1,<0.5,,70.8,0.06,0.12,0.31,0.32,479,518,0.04,0.03,0.21,0.18,57,19,152,8.5
"Gal and Pyle, 2012, NWT OR 2012 009",well,Carcajou L-24,300L246540128450,106H,65.559478,-128.8408423,Hare Indian,Bell Creek,rock chips,1350.609756,"CARCAJOU L-24-4430			",,34.3,6.04,2.46,1.72,27.71,0.47,1.15,0.41,0.05,0.04,0.005,24,6,25.4,99.76,325,,<1,7,2.3,8,3.6,6.5,52.9,<1,1105.9,0.5,6.7,1.6,51,0.9,140.6,21.6,25.9,51.1,5.87,22,4.4,0.83,3.64,0.62,3.64,0.77,2.17,0.33,1.99,0.3,6.83,0.31,0.5,6.9,9.5,38,15.2,2.5,<0.1,<0.1,<0.1,<0.1,<0.5,0.04,0.1,<0.5,,70.1,0.06,0.12,0.35,0.3,343,382,0.06,0.03,0.17,0.14,71,35,176,6.9
"Gal and Pyle, 2012, NWT OR 2012 009",well,Carcajou L-24,300L246540128450,106H,65.559478,-128.8408423,Hare Indian,Bluefish,rock chips,1375,"CARCAJOU L-24-4510			",,43.76,13.98,5.07,1.96,14.34,0.43,2.31,0.61,0.06,0.03,0.013,100,13,17.2,99.74,447,,4,15.3,8.2,17.4,3.5,10,127.4,3,666,0.7,9.8,7.1,188,1.2,124.4,26.1,36.5,64.7,7.94,28.7,5.32,1.04,4.63,0.72,4.03,0.82,2.5,0.39,2.29,0.38,4.75,1.76,24.1,25.4,24.6,161,89.6,19.5,1.3,1,0.1,0.2,<0.5,0.21,1.2,2.9,,70.4,0.15,0.4,0.27,0.27,472,511,0.16,0.06,1.08,1.02,37,15,25,3.8
"Gal and Pyle, 2012, NWT OR 2012 009",well,Carcajou L-24,300L246540128450,106H,65.559478,-128.8408423,Hare Indian,Bluefish,rock chips,1381.097561,"CARCAJOU L-24-4530			",,41.93,11.22,4.4,1.83,16.89,0.4,2.11,0.5,0.1,0.03,0.013,346,11,20.2,99.65,295,,<1,14.2,7.6,14.8,3.1,9.5,114.4,2,734.4,0.6,8,17.4,334,1.2,108.6,29.7,33.5,51.4,7.06,26.1,4.81,0.99,4.54,0.69,4.07,0.84,2.54,0.36,2.32,0.35,7.14,1.93,83.7,61.2,21.1,718,312.9,37.7,5.2,7.4,0.2,0.7,<0.5,0.39,1.7,14.2,,70.5,0.63,1.56,0.29,0.3,470,509,0.18,0.2,3.93,3.73,40,5,8,3
"Gal and Pyle, 2012, NWT OR 2012 009",well,Carcajou L-24,300L246540128450,106H,65.559478,-128.8408423,Hume,,rock chips,1384.146341,"CARCAJOU L-24-4540			",,36.79,8.39,3.18,1.67,23.26,0.34,1.63,0.39,0.07,0.03,0.011,193,8,24,99.75,227,,<1,9.1,5.3,10.3,2.6,7.7,84.2,1,666.9,0.4,6.1,10.5,300,0.7,81.9,25.3,27.4,40.5,5.8,20.9,3.76,0.79,3.68,0.55,3.03,0.69,1.94,0.29,1.95,0.27,8.05,1.34,43.4,38,12.3,351,164.2,18.6,6.5,3.3,0.1,0.3,<0.5,0.25,0.7,10,,70.8,0.49,1.14,0.3,0.42,466,505,0.13,0.16,2.85,2.69,40,5,15,5.6
"Pyle et al., 2011, NWT OR 2011 09",outcrop,Carcajou R.,,96D,64.745455,-126.8067558,Canol,Canol,rock chips,,LP10-70,,67.91,9.48,3.4,0.58,2.92,0.1,1.77,0.4,0.11,0.06,0.011,357,10,,,1673,,2,67.1,4.6,11.4,1.8,6.7,86.1,2,145.8,0.5,5.3,11.3,413,0.9,66.3,34.5,25.6,40.9,6.15,24.5,4.88,1.09,5.37,0.79,4.12,0.82,2.32,0.33,2.03,0.32,4.41,1.73,75.7,30.7,7.6,616,313.2,19.7,4.9,1.3,0.1,0.3,1.2,0.17,0.6,15,,,0.66,3.59,0.16,1.1,454,493,0.52,0.42,4.43,4.01,81,12,25,
"Pyle et al., 2011, NWT OR 2011 09",outcrop,Carcajou R.,,96D,64.745455,-126.8067558,Canol,Canol,rock chips,,LP10-71,,77.15,6.02,2.9,0.28,1.8,0.11,1.19,0.31,0.07,0.02,0.01,116,9,,,10808,,2,30.5,2.2,7.8,2,5.5,48,2,315.7,0.5,5.8,12.8,78,0.8,74.9,24.6,20.6,42.1,5.09,21.6,4.76,1.34,5.22,0.78,4.17,0.78,2.05,0.28,1.81,0.26,3.65,2.35,26,55.4,11.6,242,100,12.3,4.2,0.6,0.2,0.3,<0.5,0.27,0.4,3.7,,,1.43,4.26,0.25,0.27,447,486,0.14,0.49,3.53,3.04,121,4,8,
"Pyle et al., 2011, NWT OR 2011 09",outcrop,Carcajou R.,,96D,64.745455,-126.8067558,Canol,Canol,rock chips,,LP10-72,,56.28,10.88,6.05,0.73,5.18,0.26,2.44,0.56,0.12,0.03,0.016,79,12,,,1584,,3,22.4,4.9,14.1,3,10.7,92.2,2,251.3,0.7,8.3,19.3,144,1.9,110.6,29.7,33,70.6,8.39,32.1,6.46,1.36,5.96,0.93,4.88,0.97,2.71,0.36,2.45,0.37,7.97,4.02,14.2,109.3,17.5,99,71.5,21,4.5,0.5,0.6,0.3,<0.5,0.51,<0.1,7.3,,,1.06,6.49,0.14,0.61,455,494,0.3,0.67,7.07,6.4,92,4,9,
"Pyle et al., 2011, NWT OR 2011 09",outcrop,Carcajou R.,,96D,64.745455,-126.8067558,Canol,Canol,rock chips,,LP10-73,,82.18,4.41,1.02,0.22,0.11,0.15,0.89,0.2,0.04,<0.01,0.004,57,4,,,2489,,1,2.3,1.8,5.7,1.1,4,38.3,<1,91.7,0.4,2.7,10.6,240,0.6,38.4,8.4,15.8,26.1,3.77,15.3,2.22,0.36,1.31,0.21,1.28,0.27,0.73,0.12,0.76,0.12,7.06,0.85,56.9,14,7.4,12,35.3,8.3,0.2,1.1,0.1,0.3,<0.5,0.23,0.2,4.6,,,2.32,10.32,0.18,0.11,446,485,0.14,1.06,6.56,5.5,157,2,2,
"Pyle et al., 2011, NWT OR 2011 09",outcrop,Carcajou Ridge,,106H,64.745455,-126.8067558,Canol,Canol,rock chips,,LP10-154,,52.44,9.05,3.43,1.34,11.3,0.36,2.11,0.51,0.12,0.01,0.009,127,10,,,753,,4,19.1,4.7,12.6,2.8,9.7,88.7,1,328.4,0.7,6.7,18.1,286,1.2,107.4,33.7,36.9,61,7.96,32.3,5.33,1.19,5.37,0.82,4.47,0.95,2.64,0.4,2.44,0.35,9.75,2.26,48.5,88.9,20.2,157,99.9,19.3,2.7,2.1,0.2,0.6,<0.5,0.37,0.7,4.5,,,1.15,28.85,0.4,0.26,442,481,0.1,2.51,6.92,4.41,417,1,4,
"Gal and Pyle, 2012, NWT OR 2012 009",well,Dahadinni B-20,300B206400125000,95N,63.983957,-125.0484002,Canol,Canol,rock chips,1125,"DAHADINNI B-20-1125			",,65.45,11.33,4.21,1.84,2.13,0.45,2.06,0.43,0.09,0.02,0.011,102,11,11.4,99.4,4280,,4,14.6,6.3,14,2.1,7.1,108.1,3,189.2,0.4,6.7,11.1,287,0.9,76,22.2,24.3,43.5,5.53,22.3,3.92,0.8,3.67,0.57,3.04,0.66,1.91,0.29,1.87,0.26,5.48,1.71,35.4,46.3,14.2,180,85.9,15.3,1.1,0.9,0.2,0.3,0.6,0.19,0.5,5.1,,70.7,7.42,2.5,0.75,0.18,372,411,0.12,0.83,4.92,4.09,50,2,4,0.5
"Gal and Pyle, 2012, NWT OR 2012 009",well,Dahadinni B-20,300B206400125000,95N,63.983957,-125.0484002,Canol,Canol,rock chips,1130,"DAHADINNI B-20-1130			",,66.67,11.34,3.83,1.69,1.74,0.45,2.07,0.43,0.08,0.02,0.011,100,11,11.1,99.39,4278,,3,14,6.5,15,2.2,6.6,109.8,2,178.2,0.5,6.9,11.1,307,0.7,78.7,23.5,24.9,44.3,5.53,21.3,3.88,0.78,3.46,0.56,3.26,0.7,1.86,0.31,1.88,0.29,5.55,1.56,35.7,47.5,13.9,287,84.7,14.9,2,1,0.2,0.3,<0.5,0.19,0.5,4.6,,50.9,7.97,2.2,0.78,0.27,317,356,0.02,0.86,5.31,4.45,42,0,5,0.6
"Gal and Pyle, 2012, NWT OR 2012 009",well,Dahadinni B-20,300B206400125000,95N,63.983957,-125.0484002,Canol,Canol,rock chips,1135,"DAHADINNI B-20-1135			",,67.59,12.73,3.6,1.57,1.2,0.43,2.32,0.46,0.09,0.02,0.011,105,12,9.3,99.36,4565,,3,12.8,7.2,16.3,2.2,7,127.1,2,138.6,0.4,7,10.1,349,0.9,79.7,23.4,25.8,43.6,5.49,20.2,3.72,0.71,3.47,0.55,3.16,0.67,2.14,0.29,1.95,0.31,4.31,1.31,31.4,40.9,12.5,219,83.9,14.6,1.3,0.7,0.2,0.3,<0.5,0.19,0.7,4.4,,70,5.23,2.9,0.64,0.28,390,429,0.08,0.69,3.72,3.03,79,2,8,0.6
"Gal and Pyle, 2012, NWT OR 2012 009",well,Dahadinni B-20,300B206400125000,95N,63.983957,-125.0484002,Canol,Canol,rock chips,1140,"DAHADINNI B-20-1140			",,64.66,8.71,3.31,2.95,4.01,0.44,1.6,0.36,0.08,0.05,0.009,98,9,13.3,99.44,3617,,<1,10.6,4.8,11.6,1.9,6.3,81.9,2,336.9,0.4,5.7,13.1,349,1,67.2,24.1,22.5,38.8,4.95,18.8,3.69,0.74,3.57,0.56,3.37,0.67,1.94,0.28,1.81,0.29,6.67,1.52,37.8,44.7,10.5,187,74.6,13.7,1.3,1.4,0.1,0.3,<0.5,0.19,0.5,4.6,,70.4,6.52,3.7,0.64,0.28,420,459,0.07,0.86,5.49,4.63,67,1,5,2
"Gal and Pyle, 2012, NWT OR 2012 009",well,Dahadinni B-20,300B206400125000,95N,63.983957,-125.0484002,Canol,Canol,rock chips,1145,"DAHADINNI B-20-1145			",,58.88,14.7,4.99,2.63,2.72,0.53,2.75,0.51,0.09,0.04,0.013,90,14,11.4,99.27,5147,,<1,16.8,9.7,19.5,2.4,8.1,148.1,2,230,0.6,7.8,7.8,320,0.9,85.7,23.8,29.8,51.9,6.24,22.3,4.14,0.83,3.65,0.59,3.34,0.67,2.12,0.33,1.85,0.31,4.24,1.89,21.7,40,14.4,194,74.1,14.8,0.9,0.7,0.2,0.2,<0.5,0.21,0.7,4.5,,70.6,4.1,3,0.58,0.25,382,421,0.17,0.61,2.97,2.36,100,6,8,1.1
"Gal and Pyle, 2012, NWT OR 2012 009",well,Dahadinni B-20,300B206400125000,95N,63.983957,-125.0484002,Canol,Canol,rock chips,1150,"DAHADINNI B-20-1150			",,64.56,13.98,4.33,1.43,0.69,0.56,2.62,0.5,0.09,0.02,0.012,103,13,10.6,99.34,4760,,2,16,8.7,17.7,2.4,7.8,138.1,2,168.5,0.5,7.8,12.6,307,1,79.7,24.8,29.9,51.3,6.18,23.7,4.33,0.8,3.77,0.59,3.47,0.69,2.12,0.31,1.89,0.31,4.6,2.02,35.5,50.7,15,231,94.1,17.9,1,0.5,0.2,0.2,<0.5,0.36,0.7,5.4,,70.2,5.94,2.3,0.72,0.24,346,385,0.21,0.7,3.84,3.14,60,5,6,0.4
"Gal and Pyle, 2012, NWT OR 2012 009",well,Dahadinni B-20,300B206400125000,95N,63.983957,-125.0484002,Canol,Canol,rock chips,1155,"DAHADINNI B-20-1155			",,76.26,7.73,2.37,0.97,1.07,0.52,1.38,0.31,0.05,0.01,0.008,85,7,8.8,99.53,3356,,1,10.9,3.4,10.3,1.4,5.6,73.1,1,155.8,0.4,5,9.4,302,1.6,54.5,20.1,19.8,35,4.41,16.6,3.24,0.61,2.74,0.43,2.56,0.57,1.68,0.23,1.41,0.22,4.7,1.35,30,42.3,9.2,166,53.2,10.1,1,1.1,0.1,0.2,<0.5,0.14,0.5,3.5,,71,6.18,2.9,0.68,0.27,411,450,0.06,0.77,4.5,3.73,64,1,6,1
"Gal and Pyle, 2012, NWT OR 2012 009",well,Dahadinni B-20,300B206400125000,95N,63.983957,-125.0484002,Canol,Canol,rock chips,1160,"DAHADINNI B-20-1160			",,77.15,7.2,2.47,0.93,1.05,0.47,1.28,0.29,0.08,0.01,0.006,112,7,8.5,99.47,3606,,<1,11.2,3.3,9.1,1.2,4.8,65.9,1,189.9,0.3,4.8,11.2,357,1.8,54.7,20.8,19,30.9,4.24,16.7,3.11,0.58,2.92,0.43,2.74,0.58,1.67,0.24,1.36,0.23,4.73,1.47,39.3,39,9.7,223,77.6,15,1.4,1.4,0.1,0.2,<0.5,0.11,0.6,5.2,,69.9,7.52,2.9,0.72,0.12,421,460,0.24,0.89,4.14,3.25,71,6,3,0.4
"Gal and Pyle, 2012, NWT OR 2012 009",well,Dahadinni B-20,300B206400125000,95N,63.983957,-125.0484002,Canol,Canol,rock chips,1165,"DAHADINNI B-20-1165			",,77.07,6.93,2.78,0.99,1.14,0.49,1.22,0.28,0.07,0.01,0.007,118,7,8.5,99.51,3469,,1,10.7,2.9,8.9,1.3,4.6,61,1,207,0.3,4,10.9,334,1.3,50.4,20.7,18.6,29.6,3.95,16.2,2.78,0.65,2.84,0.43,2.55,0.53,1.48,0.21,1.37,0.2,4.57,1.62,39.3,37.2,9.9,233,80.7,17.1,1.6,1.5,0.1,0.2,<0.5,0.08,0.6,5.2,,70.1,6.35,2.7,0.71,0.25,419,458,0.09,0.76,3.81,3.05,70,2,7,0.5
"Gal and Pyle, 2012, NWT OR 2012 009",well,Dahadinni B-20,300B206400125000,95N,63.983957,-125.0484002,Canol,Canol,rock chips,1170,"DAHADINNI B-20-1170			",,80.27,5.58,2.09,0.59,0.65,0.52,0.94,0.26,0.07,<0.01,0.006,118,5,8.5,99.49,3562,,2,11.5,1.9,7.4,1.5,4.9,45.8,1,136.5,0.3,3.9,17.7,377,1.2,55.2,21.8,19,30.7,4.1,15.3,3.12,0.64,2.81,0.47,2.74,0.54,1.55,0.23,1.39,0.22,5.49,1.37,55,39.4,8.6,208,78,16.6,1.5,2.1,0.1,0.2,<0.5,0.09,0.6,6.7,,70.6,7.59,2.7,0.74,0.27,422,461,0.11,0.87,4.91,4.04,54,2,5,0.2
"Gal and Pyle, 2012, NWT OR 2012 009",well,Dahadinni B-20,300B206400125000,95N,63.983957,-125.0484002,Canol,Canol,rock chips,1175,"DAHADINNI B-20-1175			",,79.15,6.02,2.53,0.59,0.62,0.61,0.99,0.25,0.08,<0.01,0.007,91,6,8.6,99.48,4029,,<1,10.7,2.3,7.5,1.6,5.3,49.4,2,155.8,0.3,4.2,19.4,211,1.3,52.9,19.1,17.7,30.7,4.07,15.7,2.97,0.65,3,0.43,2.4,0.48,1.33,0.23,1.23,0.19,5.57,1.74,37.9,42.6,10.7,127,66.1,18.8,1,1.7,0.1,0.3,<0.5,0.14,0.5,6.1,,70.1,7.81,2.3,0.78,0.28,416,455,0.13,0.85,4.74,3.89,47,3,6,0.2
"Gal and Pyle, 2012, NWT OR 2012 009",well,Dahadinni B-20,300B206400125000,95N,63.983957,-125.0484002,Canol,Canol,rock chips,1180,"DAHADINNI B-20-1180			",,79.61,5.6,2.25,0.58,0.67,0.53,0.94,0.25,0.1,<0.01,0.006,107,6,8.8,99.39,4105,,1,10.3,2.3,7.2,1.2,3.9,45.4,1,176.4,0.3,4,17.1,425,1.6,51.5,22.2,17.3,27.8,3.77,15.4,3.11,0.64,3.18,0.48,2.62,0.58,1.62,0.24,1.3,0.22,5.56,1.53,51.7,42.8,8.6,350,77.6,18,4.1,2.2,0.1,0.3,<0.5,0.11,0.5,7.2,,70.3,8.64,2.9,0.75,0.39,422,461,0.07,0.98,5.59,4.61,52,1,7,0.2
"Gal and Pyle, 2012, NWT OR 2012 009",well,Dahadinni B-20,300B206400125000,95N,63.983957,-125.0484002,Canol,Canol,rock chips,1185,"DAHADINNI B-20-1185			",,76.05,7.41,2.62,0.57,0.42,0.46,1.33,0.29,0.08,<0.01,0.007,114,7,9.9,99.11,6998,,2,11.2,3.8,9.8,1.3,5.2,66.6,<1,129.5,0.4,4.5,16.9,277,2.1,60.6,29.7,24.4,35.2,5.07,19.3,3.91,0.76,3.97,0.58,3.3,0.68,1.87,0.28,1.57,0.26,6.17,1.86,59.1,53.3,9.6,270,93.6,18.4,1.9,1.5,0.2,0.3,<0.5,0.13,0.6,8.9,,70.4,9.06,4.5,0.67,0.28,424,463,0.07,1.14,5.46,4.32,82,1,5,0.2
"Gal and Pyle, 2012, NWT OR 2012 009",well,Dahadinni B-20,300B206400125000,95N,63.983957,-125.0484002,Canol,Canol,rock chips,1190,"DAHADINNI B-20-1190			",,73.23,6.98,2.74,1.35,1.79,0.79,1.23,0.34,0.07,0.03,0.007,97,7,10.5,99.06,7204,,<1,12,2.5,9.4,1.6,6.1,54.6,2,211.6,0.4,5,12.7,361,1.6,67.3,22.8,22.5,37.9,4.72,18,3.45,0.69,3.44,0.53,2.86,0.65,1.85,0.26,1.7,0.25,6.3,1.81,38.3,56,10.8,179,74,15.9,2.1,2.2,0.2,0.3,<0.5,0.14,0.4,5.1,,70,9.95,3.6,0.73,0.22,424,463,0.08,1.14,6.36,5.22,57,1,3,0.3
"Gal and Pyle, 2012, NWT OR 2012 009",well,Dahadinni B-20,300B206400125000,95N,63.983957,-125.0484002,Canol,Canol,rock chips,1195,"DAHADINNI B-20-1195			",,81.12,5.28,2.16,0.57,0.69,0.44,0.94,0.22,0.06,<0.01,0.005,95,5,7.8,99.29,5527,,<1,8.1,2,7.1,1.1,4.3,43.7,1,124.9,0.3,3.5,14.1,346,2.6,42,20.8,16.5,26.2,3.51,14.7,2.72,0.45,2.83,0.44,2.29,0.52,1.45,0.21,1.28,0.21,4.77,1.5,43.7,80.7,8.9,312,69.4,11.7,2.4,1.9,<0.1,0.3,<0.5,0.13,0.4,5.2,,70.6,7.77,2.9,0.73,0.28,426,465,0.05,0.9,4.14,3.24,71,1,7,0.5
"Gal and Pyle, 2012, NWT OR 2012 009",well,Dahadinni B-20,300B206400125000,95N,63.983957,-125.0484002,Canol,Canol,rock chips,1200,"DAHADINNI B-20-1200			",,69.77,7.68,3.35,1.5,2.27,1.28,1.2,0.36,0.1,0.02,0.009,70,8,11.4,98.96,8566,,<1,11.7,2,10.3,2,6.9,52.3,1,196.4,0.4,5.7,12.3,155,1.6,77.6,23.6,23.5,42.7,5.17,21,3.74,0.64,3.54,0.57,3.12,0.63,1.86,0.29,1.71,0.27,6.82,2.12,32.8,53.8,11.4,118,58.2,12.3,1.5,1,0.2,0.2,<0.5,0.17,0.3,4.1,,71,10.62,2.8,0.79,0.23,419,458,0.02,1.12,6.73,5.61,42,0,3,0.5
"Gal and Pyle, 2012, NWT OR 2012 009",well,Dahadinni B-20,300B206400125000,95N,63.983957,-125.0484002,Canol,Canol,rock chips,1205,"DAHADINNI B-20-1205			",,68.98,10.91,4.28,1.04,0.89,0.95,1.99,0.47,0.08,0.02,0.011,85,11,9.4,99.01,7978,,2,18.3,4.4,13.7,2.6,8.8,92.4,2,127.3,0.6,7.7,13.4,198,1.5,86.7,23.7,26,50.4,6.04,22.1,4.1,0.79,4,0.62,3.36,0.71,2.02,0.32,1.91,0.33,4.34,2.78,29.8,59.7,13.1,163,76.4,15,1.1,1,0.2,0.2,<0.5,0.19,0.3,4.4,,70.8,5.32,1.9,0.74,0.19,339,378,0.14,0.61,4.18,3.57,45,3,5,0.2
"Gal and Pyle, 2012, NWT OR 2012 009",well,Dahadinni B-20,300B206400125000,95N,63.983957,-125.0484002,Canol,Canol,rock chips,1215,"DAHADINNI B-20-1215			",,71.02,9.33,4.33,1.21,1.41,0.75,1.75,0.42,0.06,0.02,0.01,72,9,9.1,99.38,4791,,2,19,3.5,11.9,2.7,7.8,77.1,2,155.4,0.5,6.3,10.5,139,1.4,83.3,19.8,23.7,46.2,5.43,18.7,4.14,0.68,3.53,0.54,2.44,0.61,1.75,0.26,1.55,0.27,4.06,2.8,24,57.1,15.7,172,68.6,16.2,1.3,1,0.2,0.3,<0.5,0.19,0.5,4.1,,70.4,6.21,3,0.68,0.24,421,460,0.21,0.78,3.98,3.2,74,5,6,0.5
"Gal and Pyle, 2012, NWT OR 2012 009",well,Dahadinni B-20,300B206400125000,95N,63.983957,-125.0484002,Canol,Canol,rock chips,1220,"DAHADINNI B-20-1220			",,72.6,8.78,4.16,1.01,1.02,0.76,1.6,0.41,0.07,0.02,0.009,72,9,8.9,99.36,4914,,3,18.5,3.3,11.2,2.7,7.1,71,2,143.6,0.5,6.6,12,134,1,86.7,20.6,23.5,47.2,5.44,21.4,3.97,0.68,3.58,0.56,2.99,0.69,1.75,0.28,1.65,0.32,4.34,2.53,32.1,52.4,14.1,138,66.6,16.3,0.8,1,0.2,0.3,<0.5,0.2,0.5,4,,70.2,5.52,2.1,0.73,0.03,409,448,0,0.63,3.91,3.28,53,0,1,0.3
"Gal and Pyle, 2012, NWT OR 2012 009",well,Dahadinni B-20,300B206400125000,95N,63.983957,-125.0484002,Canol,Canol,rock chips,1225,"DAHADINNI B-20-1225			",,65.81,10.42,4.92,1.99,2.5,0.74,1.93,0.49,0.1,0.03,0.01,87,11,10.5,99.42,4154,,<1,20.6,4.5,13.6,2.4,8.1,86.6,2,228.7,0.6,7.7,13.1,162,1.2,98.2,23.7,27,50.3,6.22,23.3,4.64,0.8,4.23,0.65,3.42,0.67,2.02,0.33,1.94,0.35,4.49,2.15,29.9,53.5,14.7,153,74.9,18.8,0.9,0.9,0.2,0.3,<0.5,0.2,0.7,4.7,,70.4,4.43,2.1,0.68,0.26,404,443,0.04,0.56,3.48,2.92,61,1,7,0.6
"Gal and Pyle, 2012, NWT OR 2012 009",well,Dahadinni B-20,300B206400125000,95N,63.983957,-125.0484002,Canol,Canol,rock chips,1235,"DAHADINNI B-20-1235			",,70.28,9.08,4.37,1.48,1.75,0.8,1.68,0.49,0.08,0.03,0.009,59,10,9.4,99.41,4320,,<1,26.5,3.9,11.9,3.3,8.3,74,2,281.2,0.7,8,10.5,131,1.2,110.1,23.2,26.3,51.5,6.23,22.1,4.63,0.89,4.05,0.65,3.42,0.72,2.14,0.31,2.08,0.35,4.58,2.04,22.1,62.6,18.7,112,55,16.1,0.9,1,0.4,0.3,0.6,0.22,0.6,3.7,,70.9,4.9,1.6,0.76,0.22,342,381,0.11,0.55,3.63,3.08,43,3,6,0.3
"Gal and Pyle, 2012, NWT OR 2012 009",well,Dahadinni B-20,300B206400125000,95N,63.983957,-125.0484002,Canol,Canol,rock chips,1245,"DAHADINNI B-20-1245			",,69.82,8.73,4.86,1.43,1.64,0.87,1.58,0.47,0.1,0.03,0.009,100,9,9.9,99.43,4016,,<1,25.9,3.3,10.4,3.2,8.2,71.4,2,215.7,0.6,7.3,12.2,177,1.2,113.8,24.4,26.8,52.6,6.15,23.3,4.36,0.91,4.45,0.65,3.77,0.81,2.11,0.33,2.07,0.35,4.74,2.47,28.4,62.5,17.6,141,83.3,20.1,1.2,1.4,0.3,0.4,1.8,0.18,0.9,7.1,,70.2,5.74,1.5,0.79,0.24,331,370,0.02,0.61,4.06,3.45,38,0,6,0.5
"Gal and Pyle, 2012, NWT OR 2012 009",well,Dahadinni B-20,300B206400125000,95N,63.983957,-125.0484002,Canol,Canol,rock chips,1255,"DAHADINNI B-20-1255			",,68.69,8.97,5.42,1.27,1.39,0.8,1.64,0.48,0.11,0.02,0.01,115,9,10.7,99.5,3487,,3,36.5,3.6,11.3,2.9,8.6,74.7,1,204.6,0.5,7.2,15.9,152,1.2,105.2,22.5,27.7,54.1,6.38,23.5,4.74,0.9,4.37,0.65,3.61,0.74,2.2,0.33,2.1,0.3,5.32,3.01,35.5,76.9,20.9,160,93.2,22.8,1.8,1.7,0.3,0.4,1.1,0.2,1,7,,70.5,5.76,1.6,0.79,0.24,329,368,0.15,0.63,4.53,3.9,35,3,5,0.3
"Gal and Pyle, 2012, NWT OR 2012 009",well,Dahadinni B-20,300B206400125000,95N,63.983957,-125.0484002,Canol,Canol,rock chips,1265,"DAHADINNI B-20-1265			",,70.96,9.19,4.31,1.03,0.81,0.67,1.67,0.45,0.09,0.02,0.01,126,9,10.3,99.51,3395,,4,25.2,4.1,11,2.6,8,75.8,2,163.2,0.5,7,14.8,211,1,86.1,23.2,25.8,47.4,5.82,22.3,4.1,0.83,4.01,0.57,3.01,0.69,1.94,0.32,1.7,0.31,5.32,2.21,35.7,65.1,16,193,95.8,18.2,1.8,1.8,0.2,0.3,<0.5,0.17,0.7,5.3,,70.3,7.74,1.9,0.8,0.23,332,371,0.11,0.82,4.94,4.12,38,2,5,0.5
"Gal and Pyle, 2012, NWT OR 2012 009",well,Dahadinni B-20,300B206400125000,95N,63.983957,-125.0484002,Canol,Canol,rock chips,1275,"DAHADINNI B-20-1275			",,70.6,9.25,4.14,0.91,0.83,0.56,1.7,0.44,0.09,0.02,0.01,121,9,11,99.53,3229,,4,24.2,3.9,11.1,2.2,7.2,75.1,2,134.6,0.6,6.7,17.8,221,1.2,77.4,23.7,24.6,44.7,5.75,20.1,4.33,0.83,3.84,0.6,2.97,0.63,1.91,0.28,1.75,0.31,5.98,2.33,35.6,68.8,16.3,161,83.8,16.3,1.7,1.8,0.2,0.3,<0.5,0.18,0.6,6,,70.1,7.51,3.4,0.69,0.32,418,457,0.04,0.92,5.58,4.66,61,1,6,0.5
"Gal and Pyle, 2012, NWT OR 2012 009",well,Dahadinni B-20,300B206400125000,95N,63.983957,-125.0484002,Canol,Canol,rock chips,1295,"DAHADINNI B-20-1295			",,65.34,10.18,3.18,2.1,2.87,0.38,1.85,0.4,0.08,0.03,0.011,139,10,13.1,99.57,2643,,<1,10.9,5.3,11.8,1.7,7.6,90.3,2,154.6,0.4,5.6,15,269,1.2,60.5,24.3,23.9,38.7,5.09,16.4,3.79,0.7,3.44,0.55,3.2,0.7,1.96,0.28,1.78,0.28,7.05,1.78,61.9,45.9,10.1,201,103.5,13.5,1.7,0.9,<0.1,0.3,<0.5,0.21,0.4,5.5,,70.4,9.13,4.8,0.65,0.32,430,469,0.08,1.18,6.14,4.96,79,1,5,2.6
"Gal and Pyle, 2012, NWT OR 2012 009",well,Dahadinni B-20,300B206400125000,95N,63.983957,-125.0484002,Hare Indian,Hare Indian,rock chips,1305,"DAHADINNI B-20-1305			",,54.7,11.87,6.22,3.37,5.56,0.34,2.06,0.42,0.07,0.05,0.012,111,10,14.8,99.53,2984,,2,11.4,7.2,13.5,1.5,7.4,106,2,301.5,0.5,5.7,7.9,173,1.1,56.7,20.9,24.7,39.6,4.97,19.2,3.43,0.72,3.29,0.49,2.76,0.66,1.55,0.24,1.57,0.27,5.87,3.16,42.7,27.8,10.2,112,95.2,11.9,0.5,0.4,<0.1,0.1,<0.5,0.19,0.5,5.1,,70.6,4.94,3,0.62,0.28,412,451,0.01,0.68,3.45,2.77,88,0,8,3.7
"Gal and Pyle, 2012, NWT OR 2012 009",well,Dahadinni B-20,300B206400125000,95N,63.983957,-125.0484002,Hare Indian,Hare Indian,rock chips,1315,"DAHADINNI B-20-1315			",,56.52,18.97,6.13,1.74,1.34,0.54,3.11,0.68,0.07,0.02,0.017,94,17,10.3,99.46,3682,,2,16.5,10.9,22.9,2.1,11.9,169.5,2,144.5,0.8,10.6,4.1,182,1.8,84.3,21.8,35.1,64.8,7.54,26.5,4.88,0.93,3.85,0.6,3.74,0.75,1.88,0.33,1.99,0.35,2.22,2.26,19.1,25.8,14.8,262,87.3,17.2,0.9,0.2,0.1,0.1,<0.5,0.21,1.1,2.9,,70.1,3.23,2.4,0.57,0.3,405,444,0.12,0.48,1.52,1.04,157,8,20,0.6
"Gal and Pyle, 2012, NWT OR 2012 009",well,Dahadinni B-20,300B206400125000,95N,63.983957,-125.0484002,Hare Indian,Hare Indian,rock chips,1335,"DAHADINNI B-20-1335			",,57.81,17.53,6.37,1.57,1.36,0.47,2.95,0.62,0.08,0.02,0.016,107,16,10.7,99.47,3700,,3,16.3,10.4,21.2,2,10.4,159.4,3,136.5,0.6,9.2,4.9,182,1.3,76.8,21.2,32.5,57.6,6.73,25.5,4.26,0.83,4.15,0.58,2.99,0.63,1.96,0.34,1.84,0.31,2.65,3.19,27,27.1,14.2,213,99.9,16.7,0.8,0.2,0.1,0.1,<0.5,0.22,1.1,2.7,,70.5,3.84,2.6,0.59,0.69,388,427,1.1,0.61,2.09,1.48,125,53,33,0.5
"Gal and Pyle, 2012, NWT OR 2012 009",well,Dahadinni B-20,300B206400125000,95N,63.983957,-125.0484002,Hare Indian,Hare Indian,rock chips,1350,"DAHADINNI B-20-1350			",,54.57,18.33,9.57,1.7,1.26,0.55,2.95,0.69,0.08,0.04,0.058,102,17,9.7,99.49,3355,,4,18.9,10.4,22.4,3.1,12.4,167.4,6,144.3,0.9,10.5,4.3,177,1.5,88.4,21.8,35,62.4,7.37,27.4,4.79,0.93,4.08,0.6,3.23,0.71,2.11,0.32,2.28,0.34,2.23,1.83,21.1,24.9,14.3,127,84.7,15.6,0.3,0.2,0.1,<0.1,<0.5,0.18,1.2,1.8,,71,3.25,2,0.63,0.28,385,424,0.01,0.44,1.87,1.43,104,1,15,0.7
"Gal and Pyle, 2012, NWT OR 2012 009",well,Dahadinni B-20,300B206400125000,95N,63.983957,-125.0484002,Hare Indian,Hare Indian,rock chips,1375,"DAHADINNI B-20-1375			",,57.65,19.93,6.39,1.65,0.37,0.54,3.19,0.74,0.11,0.01,0.018,96,18,8.9,99.52,3312,,2,18.8,10.5,23.9,2.1,12.1,173,3,128.9,0.7,11,4.7,221,1.3,95.8,23.9,37,66.9,7.85,26,5.14,1.05,4.4,0.7,3.7,0.8,2.34,0.37,2.14,0.37,2.02,2.08,22.4,26.5,15.4,191,92.5,17.2,0.5,0.2,0.2,<0.1,<0.5,0.21,1.2,1.8,,70.1,3.45,2.5,0.58,0.26,408,447,0.13,0.51,1.99,1.48,127,7,13,0.2
"Gal and Pyle, 2012, NWT OR 2012 009",well,Dahadinni B-20,300B206400125000,95N,63.983957,-125.0484002,Hare Indian,Bluefish,rock chips,1395,"DAHADINNI B-20-1395			",,57.39,9.99,3.25,2.34,5.69,0.49,1.82,0.44,0.09,0.03,0.015,210,10,18,99.57,2046,,3,9.8,5.2,12.1,1.6,8.1,86.5,2,229.5,0.4,6.2,29,436,1.2,78,27.5,28.3,44.4,6.14,21.6,4.15,0.82,4.1,0.62,3.55,0.74,2.01,0.33,1.87,0.32,10.73,1.83,96.5,59.7,11.9,377,144.9,19.1,5.7,2.6,0.1,0.6,<0.5,0.16,0.3,10.1,,50.2,12.11,6.3,0.66,0.4,427,466,0.13,1.55,8.13,6.58,78,2,5,2
"Gal and Pyle, 2012, NWT OR 2012 009",well,Dahadinni B-20,300B206400125000,95N,63.983957,-125.0484002,Hare Indian,Bluefish,rock chips,1400,"DAHADINNI B-20-1400			",,61.28,8.04,2.54,1.26,5.75,0.55,1.55,0.38,0.11,0.01,0.016,346,8,17.9,99.43,2287,,2,8.3,4,10.3,2,7.4,73.2,1,288.7,0.4,5.5,43.2,795,0.9,80.1,37,28.8,37.7,6.5,23.3,4.81,0.95,5.06,0.74,4.14,0.96,2.78,0.41,2.59,0.4,11.3,1.71,166.4,56.2,9,686,244,26.6,9,10.2,<0.1,1,<0.5,0.14,0.5,16.1,,50.4,16.68,7.8,0.68,0.38,430,469,0.08,2.05,10.1,8.05,77,1,4,1.4
"Gal and Pyle, 2012, NWT OR 2012 009",well,Dahadinni B-20,300B206400125000,95N,63.983957,-125.0484002,Hare Indian,Bluefish,rock chips,1405,"DAHADINNI B-20-1405			",,64.81,7.94,2.88,0.91,5.43,0.52,1.53,0.35,0.11,0.01,0.013,379,8,15.1,99.6,1781,,3,8.7,4.1,10.1,1.4,6.3,68.2,2,259.1,0.4,4.6,26.1,437,1.4,67.2,29.8,26.1,33.8,5.51,22,4,0.86,3.88,0.6,3.3,0.76,2.28,0.33,2.06,0.32,9.43,2.01,112.2,55.6,9.5,500,284.7,24.8,5,4.6,<0.1,0.5,<0.5,0.16,0.6,12.2,,70.1,15.36,8.6,0.64,0.35,430,469,0.06,2.01,8.61,6.6,100,1,4,1.2
"Gal and Pyle, 2012, NWT OR 2012 009",well,Dahadinni B-20,300B206400125000,95N,63.983957,-125.0484002,Hare Indian,Bluefish,rock chips,1410,"DAHADINNI B-20-1410			",,57.05,10.33,3.23,2.19,6.53,0.56,2.11,0.48,0.1,0.02,0.014,236,10,17,99.61,1453,,4,9.9,5.4,12.9,2.5,8.9,95.5,2,294.8,0.6,6.4,22.5,409,1.3,91.8,30.4,29.3,45.1,6.72,24,4.39,0.91,4.72,0.7,3.48,0.86,2.41,0.36,2.64,0.36,9.35,2.04,86.9,51,10.4,457,164.6,19.2,5.7,3.7,<0.1,0.4,<0.5,0.13,0.3,10.6,,70.6,13.86,7.6,0.65,0.35,432,471,0.09,1.8,7.57,5.77,100,1,5,1.9
"Gal and Pyle, 2012, NWT OR 2012 009",well,Dahadinni B-20,300B206400125000,95N,63.983957,-125.0484002,Hare Indian,Bluefish,rock chips,1415,"DAHADINNI B-20-1415			",,56.2,9.37,2.78,2.57,8.39,0.45,1.91,0.39,0.08,0.02,0.011,177,9,17.5,99.66,1371,,2,8.2,4.9,11.7,1.7,7,83.6,1,376.6,0.4,5.3,21.2,295,0.9,68.6,24.9,24.7,36.5,5.36,19.6,3.57,0.71,3.68,0.53,2.83,0.59,1.9,0.31,1.84,0.27,9.22,1.75,82.7,39.8,9.6,238,117.9,12,3.3,2.5,<0.1,0.2,<0.5,0.13,0.4,9,,70.2,13.07,8.4,0.61,0.32,432,471,0.08,1.79,7.47,5.68,112,1,4,1.6
"Gal and Pyle, 2012, NWT OR 2012 009",well,Dahadinni B-20,300B206400125000,95N,63.983957,-125.0484002,Hare Indian,Bluefish,rock chips,1420,"DAHADINNI B-20-1420			",,61.5,9.13,2.56,1.12,6.54,0.42,1.9,0.41,0.08,0.01,0.012,196,9,16,99.68,1176,,3,8.5,5.3,11.2,1.5,7.7,81.1,2,263.5,0.5,5.2,18.9,419,1.1,76.4,26.9,26.3,37.8,5.64,19.1,4.02,0.82,3.94,0.6,3.51,0.71,2.18,0.32,2.14,0.33,9.25,1.76,84.3,49.1,9.5,345,128,12.4,7.1,2.7,<0.1,0.2,<0.5,0.13,0.3,13.5,,70,12.71,6.7,0.66,0.35,431,470,0.11,1.62,7.79,6.17,86,1,4,1.6
"Gal and Pyle, 2012, NWT OR 2012 009",well,Dahadinni B-20,300B206400125000,95N,63.983957,-125.0484002,Hare Indian,Bluefish,rock chips,1425,"DAHADINNI B-20-1425			",,57.67,7.82,2.54,1.64,10.13,0.36,1.64,0.36,0.08,0.02,0.012,165,8,17.4,99.71,1035,,4,7.4,3.9,9.6,1.7,6.3,66.9,1,303.9,0.4,4.3,14.5,381,1.2,65.4,22.8,22.3,32.6,4.84,18.4,3.23,0.73,3.47,0.51,2.86,0.62,1.9,0.27,1.74,0.28,9.31,1.79,74.8,41.8,8.7,230,119.6,9.4,5,2.6,<0.1,0.2,<0.5,0.11,0.2,11.2,,70.1,11.18,6.7,0.63,0.33,434,473,0.06,1.5,6.82,5.32,98,1,5,2.5
"Gal and Pyle, 2012, NWT OR 2012 009",well,Dahadinni B-20,300B206400125000,95N,63.983957,-125.0484002,Hare Indian,Bluefish,rock chips,1430,"DAHADINNI B-20-1430			",,59.24,7.95,2.67,1.88,8.61,0.3,1.66,0.34,0.08,0.02,0.013,171,8,16.9,99.69,1261,,3,6.4,4.4,9.4,1.3,6.5,68.9,<1,329.6,0.3,4.6,14.3,364,0.8,60.8,22.9,22.7,31,4.89,17.4,3.2,0.69,3.48,0.52,2.46,0.57,1.67,0.26,1.65,0.27,9.42,1.89,54.3,41.3,8.9,259,120.9,10.3,7.1,1.7,<0.1,0.2,<0.5,0.13,0.2,12.9,,70.2,10.82,6.1,0.64,0.32,431,470,0.11,1.42,7.28,5.86,83,2,4,2
"Pyle and Gal, 2012, NWT OR 2012 008",outcrop,Dahadinni River East,,95N,63.702543,-125.1073879,Canol,Canol,rock pulp,0 to 3,11DRE-001,,77.72,8.7,0.89,0.5,0.13,0.73,1.59,0.42,0.03,<0.01,0.012,28,8,8.6,99.37,5226,,<1,1,4.2,11.3,2.3,7.2,73.2,2,117.1,0.6,5.9,9.3,194,0.8,79.7,19.4,25.1,46.2,5.75,20.3,3.2,0.54,2.45,0.42,2.41,0.61,1.56,0.27,1.65,0.29,4.4,0.51,29.4,8,10.1,10,7,7.5,<0.1,0.6,0.3,0.3,0.6,0.2,0.2,4.6,,70.2,0.01,0.04,0.29,0.29,610,649,0.13,0.02,4.66,4.64,1,3,6,0
"Pyle and Gal, 2012, NWT OR 2012 008",outcrop,Dahadinni River East,,95N,63.702543,-125.1073879,Canol,Canol,rock pulp,3 to 6,11DRE-002,,65.77,6.96,4.72,2.94,4.27,0.57,1.28,0.34,0.05,0.04,0.008,45,7,12.5,99.49,3564,,<1,5.3,3.3,9.3,1.9,6.3,58.4,2,402.4,0.4,5.2,6.3,158,0.8,72.4,15.6,20,36.8,4.35,15.8,2.76,0.43,1.97,0.36,2.03,0.49,1.48,0.22,1.09,0.22,3.55,0.41,24.6,24.3,7.8,53,22.5,7.6,0.2,0.9,0.2,0.3,<0.5,0.19,0.3,4.8,,70.4,0.02,0.02,0.4,0.49,610,649,0.06,0.03,3.33,3.3,1,2,15,1.3
"Pyle and Gal, 2012, NWT OR 2012 008",outcrop,Dahadinni River East,,95N,63.702543,-125.1073879,Canol,Canol,rock pulp,6 to 9,11DRE-003,,80.62,6.92,1.2,0.43,0.25,0.62,1.27,0.37,0.04,<0.01,0.01,24,6,7.8,99.47,4468,,2,3.5,2.7,8.8,1.8,6.5,57,1,140.4,0.4,5.2,6.6,94,1,77.2,14.8,21.4,39.5,4.77,17.2,3.09,0.44,1.84,0.34,1.96,0.47,1.32,0.23,1.42,0.22,4.67,2.71,23.8,13.6,11.9,19,8.7,5.6,<0.1,0.6,0.2,0.3,<0.5,0.27,0.2,2.6,,70.8,0.01,0.03,0.28,0.53,609,648,0.12,0.03,3.89,3.86,1,3,14,0.1
"Pyle and Gal, 2012, NWT OR 2012 008",outcrop,Dahadinni River East,,95N,63.702543,-125.1073879,Canol,Canol,rock pulp,9 to 12,11DRE-004,,76.04,8.9,2.29,0.56,0.22,0.47,1.85,0.43,0.08,<0.01,0.011,31,8,8.5,99.33,5540,,3,4.7,3.5,12,2.2,7.7,78.1,2,111.5,0.5,6.7,7.4,125,1.1,81.7,17.5,26,49.8,5.94,20.4,4.03,0.58,2.38,0.41,2.29,0.56,1.63,0.26,1.85,0.27,3.57,0.4,32.4,14.7,16.8,57,20.9,18,<0.1,1.3,0.3,0.4,<0.5,0.26,0.1,5.6,,70.1,0.01,0.05,0.22,1.15,526,565,0.09,0.05,3.76,3.71,1,2,31,0.1
"Pyle and Gal, 2012, NWT OR 2012 008",outcrop,Dahadinni River East,,95N,63.702543,-125.1073879,Canol,Canol,rock pulp,12 to 15,11DRE-005,,76.29,10.28,1.05,0.67,0.15,0.49,2.04,0.5,0.04,<0.01,0.013,38,9,8,99.48,4249,,3,1.4,4.7,13.4,2.7,8.5,92.9,2,115.9,0.6,7.6,7.3,165,1.1,91.9,16.6,27.8,50.5,6.06,22.2,3.58,0.52,1.99,0.35,2.01,0.46,1.66,0.28,1.73,0.27,3.55,0.4,19.5,7.9,16.8,14,10.8,5.9,<0.1,0.7,0.2,0.3,<0.5,0.15,0.2,2.9,,70,0.01,0.04,0.17,0.66,477,516,0.17,0.04,3.62,3.58,1,5,18,0.1
"Pyle and Gal, 2012, NWT OR 2012 008",outcrop,Dahadinni River East,,95N,63.702543,-125.1073879,Canol,Canol,rock pulp,15 to 18,11DRE-006,,75.46,10.19,1.12,0.66,0.15,0.53,1.99,0.52,0.04,<0.01,0.011,41,9,8.8,99.45,4407,,1,1.8,4.8,13.3,2.8,8.6,93.7,2,105.4,0.4,7.5,8.1,152,0.9,99.5,16.4,29.8,55.9,6.62,25.4,3.93,0.53,2.23,0.37,2.3,0.58,1.62,0.24,1.57,0.27,3.62,0.42,18.6,9.3,16.1,16,7,6.1,<0.1,0.8,0.3,0.3,<0.5,0.15,0.2,4.5,,70.2,0.02,0.06,0.24,0.57,609,648,0.05,0.03,3.81,3.78,2,1,15,0.1
"Pyle and Gal, 2012, NWT OR 2012 008",outcrop,Dahadinni River East,,95N,63.702543,-125.1073879,Canol,Canol,rock pulp,18 to 21,11DRE-007,,76.5,9.55,1.26,0.63,0.22,0.52,1.84,0.45,0.04,<0.01,0.012,36,9,8.3,99.36,5269,,1,1.8,4.1,12.5,2.4,7.3,85.5,2,141,0.5,6.9,5.7,149,1.2,89.1,16.8,27.3,49.1,5.78,21.9,3.34,0.52,2.13,0.36,2.37,0.54,1.62,0.24,1.69,0.24,3,0.36,20.6,12,17.6,13,11.5,8.6,<0.1,0.6,0.3,0.3,<0.5,0.15,0.2,2.1,,70.5,0.01,0.04,0.17,0.71,487,526,0.26,0.04,3.47,3.43,1,7,20,0.1
"Pyle and Gal, 2012, NWT OR 2012 008",outcrop,Dahadinni River East,,95N,63.702543,-125.1073879,Canol,Canol,rock pulp,21 to 24,11DRE-008,,77.42,9.6,1.1,0.61,0.11,0.57,1.89,0.46,0.03,<0.01,0.011,34,8,7.6,99.41,4846,,3,1,4.8,12,2.2,6.8,83.9,2,114.7,0.4,6.7,6.6,129,1,81,15.1,25.4,46.6,5.55,21,3.26,0.5,1.99,0.33,1.91,0.44,1.52,0.24,1.4,0.22,2.93,0.51,13.6,6.8,12.5,13,6.6,5.1,<0.1,0.6,0.2,0.2,<0.5,0.13,0.3,2,,70.1,0.02,0.04,0.35,0.48,488,527,0.05,0.02,3.12,3.1,1,2,15,0.1
"Pyle and Gal, 2012, NWT OR 2012 008",outcrop,Dahadinni River East,,95N,63.702543,-125.1073879,Canol,Canol,rock pulp,24 to 27,11DRE-009,,80.19,7.79,1.28,0.47,0.13,0.55,1.5,0.39,0.04,<0.01,0.009,40,7,7.1,99.41,4837,,3,1.7,3.3,10.8,2.2,6.1,70.2,1,123.1,0.4,5.7,5.9,196,0.9,72.9,13.7,22.2,41,4.88,16.8,2.84,0.52,1.87,0.33,1.72,0.43,1.38,0.21,1.24,0.22,2.8,0.3,19.1,11.1,11.8,27,11.8,9.8,<0.1,1,0.2,0.2,<0.5,0.11,0.3,2.1,,70.6,0.01,0.04,0.23,0.65,609,648,0.1,0.03,2.9,2.87,1,3,22,0.1
"Pyle and Gal, 2012, NWT OR 2012 008",outcrop,Dahadinni River East,,95N,63.702543,-125.1073879,Canol,Canol,rock pulp,27 to 30,11DRE-010,,76.46,9.61,1.54,0.62,0.14,0.43,1.88,0.44,0.05,<0.01,0.011,42,9,8.2,99.42,4521,,2,2,4.1,12.9,1.7,6.7,91.4,2,111.4,0.5,6.5,6.1,210,1.2,76.5,15.1,25.6,45.5,5.66,21.4,3.18,0.5,1.73,0.32,1.94,0.47,1.55,0.23,1.43,0.25,3.09,0.26,30.4,11.9,13.5,39,8.3,14.5,<0.1,1,0.2,0.2,<0.5,0.11,0.5,3.9,,70.2,0.01,0.05,0.2,0.59,609,648,0.3,0.04,2.93,2.89,2,10,20,0.4
"Pyle and Gal, 2012, NWT OR 2012 008",outcrop,Dahadinni River East,,95N,63.702543,-125.1073879,Canol,Canol,rock pulp,30 to 33,11DRE-011,,76.68,9.51,1.28,0.59,0.2,0.59,1.84,0.45,0.05,<0.01,0.011,35,8,8,99.19,6724,,3,1,4.1,12.6,2.4,7.7,82.9,2,162.9,0.6,7,7.9,221,1.3,80.9,15.3,27.3,47.6,5.77,21.3,3.32,0.41,2.1,0.35,1.79,0.47,1.33,0.22,1.43,0.22,3.04,0.36,18.2,10.6,17.3,9,12.5,10.9,<0.1,0.7,0.3,0.4,<0.5,0.15,0.4,3.4,,70.4,0.01,0.04,0.16,0.8,488,527,0.02,0.04,3.18,3.14,1,1,25,0.1
"Pyle and Gal, 2012, NWT OR 2012 008",outcrop,Dahadinni River East,,95N,63.702543,-125.1073879,Canol,Canol,rock pulp,33 to 36,11DRE-012,,75.98,10.41,1.1,0.67,0.15,0.6,2.01,0.51,0.05,<0.01,0.01,42,9,7.9,99.44,4218,,6,1.7,4.3,13.1,2.5,7.7,93.2,2,128,0.6,7.3,6.4,322,1,92.2,16.5,27.7,51.8,6.25,21.5,3.28,0.53,2.16,0.36,1.98,0.57,1.71,0.25,1.88,0.24,3.26,0.25,16.3,7.5,13.6,17,10.5,8.7,<0.1,0.9,0.2,0.3,<0.5,0.12,0.2,2.4,,70,0.01,0.05,0.2,0.55,609,648,0.05,0.03,3.43,3.4,1,1,16,0.1
"Gal and Pyle, 2012, NWT OR 2012 009",well,Discovery Ridge H-55,300H556530126450,96E,65.404436,-126.9088099,Imperial,Loon Creek,rock chips,310,"DISCOVERY RIDGE H-55-310			",,62.61,13.29,5.85,1.94,1.58,0.51,2.47,0.65,0.12,0.03,0.013,116,15,10.6,99.7,1065,,3,21.6,7.1,16.6,3.6,9.5,123.7,2,188.5,0.7,10.5,8,414,1.4,120.1,29.1,33.9,62.8,7.39,27,5.23,1.06,4.42,0.71,4.32,0.84,2.49,0.38,2.56,0.36,2.95,2.2,15.4,67.3,23,247,113.7,23.8,3.1,0.9,0.3,0.3,3.1,0.25,1.9,6.1,,70.6,0.62,9.65,0.06,0.47,426,465,0.22,0.89,2.77,1.88,348,8,17,0.4
"Gal and Pyle, 2012, NWT OR 2012 009",well,Discovery Ridge H-55,300H556530126450,96E,65.404436,-126.9088099,Imperial,Mirror Lake,rock chips,315,"DISCOVERY RIDGE H-55-315			",,63.63,11.91,5.4,1.94,1.88,0.45,2.23,0.57,0.09,0.03,0.009,124,13,11.5,99.69,1140,,3,21.9,6.7,15.2,3.4,9,109,2,181.6,0.7,9.7,11.3,402,1.1,116.9,27,33,60.4,7.05,26.3,4.95,0.99,4.42,0.7,4.39,0.82,2.47,0.38,2.3,0.36,3.91,2.08,23.1,69.3,23,235,121.4,25.1,2.9,1.2,0.3,0.4,3.6,0.29,2.2,5.4,,71,0.98,13.89,0.07,0.51,425,464,0.38,1.28,3.4,2.12,409,11,15,0.4
"Gal and Pyle, 2012, NWT OR 2012 009",well,Discovery Ridge H-55,300H556530126450,96E,65.404436,-126.9088099,Imperial,Mirror Lake,rock chips,320,"DISCOVERY RIDGE H-55-320			",,60.96,13.87,5.68,2.06,1.83,0.42,2.74,0.63,0.1,0.03,0.012,118,14,11.3,99.68,1062,,2,20.3,8.2,17.6,3.1,10.3,134.4,2,197,0.7,10.3,9.2,483,1.3,120.5,27.5,34.4,63.6,7.51,29.1,5.27,1.05,4.5,0.71,4.11,0.84,2.44,0.39,2.46,0.37,3.16,2.12,16.4,55.1,16.9,245,104.2,22,2.2,0.8,0.2,0.3,1.7,0.18,1.8,6.3,,70,0.78,11.02,0.07,0.53,427,466,0.18,1.01,2.88,1.87,383,6,18,0.5
"Gal and Pyle, 2012, NWT OR 2012 009",well,Discovery Ridge H-55,300H556530126450,96E,65.404436,-126.9088099,Imperial,Mirror Lake,rock chips,325,"DISCOVERY RIDGE H-55-325			",,58.78,16.27,6.16,2.13,1.29,0.42,3.04,0.69,0.09,0.03,0.013,99,17,10.8,99.7,981,,2,19.8,9.3,20,3.2,9.8,154.3,2,185.2,0.7,10.7,6.1,375,1.3,115.5,24.8,34.7,63.3,7.47,27.3,5.13,1.05,4.13,0.67,3.86,0.81,2.34,0.37,2.33,0.35,2.26,1.83,11.5,48.1,16.7,240,90.9,19.6,1.5,0.5,0.2,0.2,1.4,0.12,1.5,3.9,,70.8,0.5,6.06,0.08,0.46,426,465,0.15,0.57,1.97,1.4,308,8,23,0.5
"Gal and Pyle, 2012, NWT OR 2012 009",well,Discovery Ridge H-55,300H556530126450,96E,65.404436,-126.9088099,Imperial,Mirror Lake,rock chips,330,"DISCOVERY RIDGE H-55-330			",,58.19,16.69,6.07,2.03,1.11,0.4,3.11,0.67,0.09,0.03,0.013,94,17,11.3,99.72,962,,1,20.5,9.9,22,3.2,10.6,165.6,3,172,0.7,10.6,6.9,328,1.5,110.7,24.1,34.2,63.8,7.57,27.3,4.96,1.01,4.25,0.67,3.72,0.78,2.17,0.37,2.44,0.37,2.28,1.6,12.8,45.7,16.5,185,89.6,18.7,1.1,0.5,0.2,0.2,1.3,0.1,1.4,4,,70.7,0.44,7.52,0.06,0.49,428,466,0.16,0.69,2.29,1.6,328,7,21,0.3
"Gal and Pyle, 2012, NWT OR 2012 009",well,Discovery Ridge H-55,300H556530126450,96E,65.404436,-126.9088099,Imperial,Mirror Lake,rock chips,335,"DISCOVERY RIDGE H-55-335			",,60.56,15.41,5.52,1.84,0.99,0.4,2.82,0.61,0.09,0.03,0.013,108,16,11.4,99.71,1079,,4,18.7,8.6,19.9,3.2,9.1,153,2,168,0.6,9.9,8.8,389,1.5,102.5,24.7,32.3,59.9,7.04,26.2,4.89,1.03,4.18,0.66,3.61,0.81,2.22,0.36,2.18,0.36,2.94,1.76,20.2,49,15.7,212,100.6,20.7,1.4,0.6,0.2,0.2,2,0.12,1.9,5.1,,70.3,0.67,9.91,0.06,0.48,429,467,0.14,0.91,2.62,1.71,378,5,18,0.3
"Gal and Pyle, 2012, NWT OR 2012 009",well,Discovery Ridge H-55,300H556530126450,96E,65.404436,-126.9088099,Canol,Dodo Canyon,rock chips,340,"DISCOVERY RIDGE H-55-340			",,63.7,14.01,5.04,1.69,0.97,0.4,2.58,0.56,0.07,0.03,0.011,109,14,10.7,99.73,1111,,2,18.4,7.5,17.6,2.7,7.3,136,2,150.4,0.6,8.6,8.7,349,1.2,90.9,21.9,29.9,53.5,6.29,23,4.39,0.87,3.63,0.6,3.64,0.72,2.05,0.34,2.1,0.32,3.02,1.67,22,47.8,15.4,263,102.1,20,1.6,0.5,0.2,0.2,1.7,0.14,2.1,6.1,,70.2,0.81,11.26,0.07,0.47,430,468,0.11,1.03,2.89,1.86,390,4,16,0.3
"Gal and Pyle, 2012, NWT OR 2012 009",well,Discovery Ridge H-55,300H556530126450,96E,65.404436,-126.9088099,Canol,Dodo Canyon,rock chips,345,"DISCOVERY RIDGE H-55-345			",,65.13,11.49,4.6,1.76,1.6,0.39,2.2,0.48,0.08,0.02,0.01,114,12,11.9,99.71,1202,,<1,18.8,6.6,14.5,2.5,7.6,112.2,2,169.7,0.5,7.6,10.8,353,1,82.7,22.2,27.1,49.2,5.98,22.2,4.33,0.86,3.73,0.59,3.28,0.69,2.04,0.29,1.83,0.28,4.57,1.87,27.8,52.8,13.9,212,101.8,19.4,1.6,0.9,0.2,0.3,1.4,0.17,1.6,5.7,,70.6,1.3,18.79,0.06,0.48,430,468,0.2,1.7,4.08,2.38,461,5,12,0.4
"Gal and Pyle, 2012, NWT OR 2012 009",well,Discovery Ridge H-55,300H556530126450,96E,65.404436,-126.9088099,Canol,Dodo Canyon,rock chips,350,"DISCOVERY RIDGE H-55-350			",,67.76,10.88,4.31,1.38,1.05,0.34,2.05,0.43,0.07,0.02,0.01,115,11,11.4,99.72,1236,,2,16.5,6,14.4,2.1,6.5,105.1,2,166.6,0.5,7.3,12.6,399,0.8,75,22.2,25.6,45.1,5.5,20.4,3.94,0.85,3.61,0.57,3.26,0.66,2.02,0.29,1.9,0.28,4.6,2.02,33.9,52.5,15.1,246,108.8,21.5,1.5,1.1,0.2,0.3,1.9,0.18,1.8,6,,69.8,1.36,20.86,0.06,0.46,428,466,0.31,1.88,4.22,2.34,494,7,11,0.2
"Gal and Pyle, 2012, NWT OR 2012 009",well,Discovery Ridge H-55,300H556530126450,96E,65.404436,-126.9088099,Canol,Dodo Canyon,rock chips,355,"DISCOVERY RIDGE H-55-355			",,67.51,9.03,3.9,1.65,1.74,0.3,1.74,0.37,0.07,0.03,0.008,133,9,13.3,99.69,1270,,3,15.9,4.5,11.5,1.8,5.6,86.8,1,177.1,0.4,5.7,18.2,366,0.8,67.6,24.3,25.5,41.2,5.41,19.9,3.81,0.83,3.79,0.6,3.3,0.71,2.01,0.3,2.03,0.28,6.43,2.16,50.4,57.3,13.2,256,121.7,22.4,1.7,1.5,0.2,0.3,3.1,0.24,1.8,7.4,,70.6,1.94,28.57,0.06,0.44,428,466,0.43,2.57,5.57,3,513,8,8,0.2
"Gal and Pyle, 2012, NWT OR 2012 009",well,Discovery Ridge H-55,300H556530126450,96E,65.404436,-126.9088099,Canol,Dodo Canyon,rock chips,360,"DISCOVERY RIDGE H-55-360			",,68.73,8.76,3.91,1.59,2.09,0.31,1.69,0.4,0.08,0.02,0.008,137,9,12.1,99.69,1200,,2,17.4,4.7,11.6,2.2,6.3,81.6,1,196.7,0.5,6.2,15.8,453,1.5,77.7,25.1,26.9,43.8,5.65,21.5,4.19,0.83,4.01,0.61,3.22,0.72,2.06,0.3,1.95,0.29,5.54,2,44.7,50.9,13.8,252,109.1,21.9,1.9,1.5,0.2,0.4,2,0.22,1.5,6.6,,70.2,2.28,29.5,0.07,0.45,428,466,0.31,2.67,5.79,3.12,509,5,8,0.3
"Gal and Pyle, 2012, NWT OR 2012 009",well,Discovery Ridge H-55,300H556530126450,96E,65.404436,-126.9088099,Canol,Dodo Canyon,rock chips,365,"DISCOVERY RIDGE H-55-365			",,74.1,6.85,2.67,1,0.98,0.28,1.31,0.32,0.09,0.01,0.007,125,7,12.1,99.78,1184,,3,12.7,2.8,11.4,1.6,6.2,62.6,<1,141.8,0.3,4.7,19.3,326,0.8,58.5,22.4,21.3,32,4.66,17.3,3.61,0.7,3.33,0.52,3.22,0.68,1.83,0.26,1.64,0.3,6.68,1.72,53.3,56.7,13.2,229,108.7,17.9,2,1.9,0.2,0.4,3.4,0.21,1.2,6.6,,70.6,2.83,36.34,0.07,0.45,427,465,0.29,3.28,6.78,3.5,536,4,7,0.2
"Gal and Pyle, 2012, NWT OR 2012 009",well,Discovery Ridge H-55,300H556530126450,96E,65.404436,-126.9088099,Canol,Vermillion Creek,rock chips,370,"DISCOVERY RIDGE H-55-370			",,61.94,9.89,4.17,2.58,3.57,0.39,2.06,0.46,0.1,0.03,0.009,102,10,14.5,99.73,1075,,4,17.1,5.1,12.7,2.2,8.4,89.4,2,212,0.6,7.5,15.5,249,1.3,91.3,25.5,27.1,52.7,6.45,26.6,4.5,0.98,4.44,0.67,3.9,0.78,2.31,0.33,2.07,0.33,6.9,2.26,31.6,61.1,16.1,175,79,19.9,1.8,1.1,0.2,0.3,2.5,0.25,0.7,4.6,,70.1,2.03,30.74,0.06,0.51,428,466,0.33,2.76,6.02,3.26,511,5,8,0.9
"Gal and Pyle, 2012, NWT OR 2012 009",well,Discovery Ridge H-55,300H556530126450,96E,65.404436,-126.9088099,Canol,Vermillion Creek,rock chips,375,"DISCOVERY RIDGE H-55-375			",,64.59,9.56,4.34,1.57,2.6,0.37,1.85,0.46,0.1,0.02,0.008,123,10,14.3,99.76,1025,,2,24,4.4,11.9,2.8,8.9,78.5,2,174.1,0.7,7.2,19.4,238,1.5,93.7,26.2,27.9,54,6.66,26.6,4.93,1.06,4.72,0.69,4.21,0.87,2.37,0.34,2.36,0.36,7.35,2.55,46.2,80.8,24.2,204,115.9,25.1,2.4,1.5,0.3,0.5,3,0.35,1.3,6.6,,71.1,2.45,33.29,0.07,0.51,428,466,0.28,3,6.5,3.5,512,4,8,0.5
"Gal and Pyle, 2012, NWT OR 2012 009",well,Discovery Ridge H-55,300H556530126450,96E,65.404436,-126.9088099,Canol,Vermillion Creek,rock chips,380,"DISCOVERY RIDGE H-55-380			",,58.37,8.71,4.07,1.63,5.61,0.39,1.79,0.43,0.1,0.02,0.008,124,9,18.6,99.77,913,,3,21.9,4,10.1,2.3,8,75.6,2,208.6,0.6,6.6,22,236,1.2,83.8,28.3,27.1,51.6,6.66,25.9,4.76,1.02,4.66,0.71,4.13,0.82,2.28,0.35,2,0.34,10.34,2.68,51.7,84,20.7,252,115.8,21.6,2.8,1.2,0.4,0.5,2.3,0.32,0.7,6.7,,70.8,2.62,47.59,0.05,0.73,427,465,0.54,4.22,9.77,5.55,487,6,7,1.5
"Gal and Pyle, 2012, NWT OR 2012 009",well,Discovery Ridge H-55,300H556530126450,96E,65.404436,-126.9088099,Ramparts,Ramparts Platform,rock chips,385,"DISCOVERY RIDGE H-55-385			",,40.62,7.3,3.38,1.72,19.89,0.27,1.47,0.34,0.08,0.02,0.009,93,7,24.6,99.72,1238,,2,12.5,3.4,8.6,1.7,6.1,65.6,1,448.6,0.4,5.1,12.5,171,0.6,63.2,20.7,23.1,37,5.07,21.6,3.67,0.75,3.37,0.49,3.3,0.61,1.79,0.27,1.67,0.27,10.17,1.9,26.3,47.2,11.3,146,77.5,15.8,1.4,0.7,0.2,0.3,1.5,0.21,0.5,4.7,,70.2,2.58,42.03,0.06,0.62,430,468,0.54,3.75,8.35,4.6,503,6,7,2.3
"Gal and Pyle, 2012, NWT OR 2012 009",well,Discovery Ridge H-55,300H556530126450,96E,65.404436,-126.9088099,Hare Indian,Bell Creek,rock chips,415,"DISCOVERY RIDGE H-55-415			",,47.14,10.75,4.72,1.66,14.83,0.39,1.82,0.53,0.09,0.07,0.009,54,11,17.7,99.72,1293,,<1,12.8,4.6,12.2,3.6,9.2,81.7,2,384.6,0.6,9.2,5.7,136,1.5,133.4,27.7,31.5,63.5,7.61,29.3,5.8,1.08,5.05,0.81,4.61,0.87,2.77,0.39,2.47,0.4,5.23,1.19,9.6,30.2,14.8,251,47.5,11.4,0.5,0.3,0.2,<0.1,1.3,0.1,0.7,2,,70.8,0.85,16.03,0.05,0.61,429,467,0.25,1.44,3.93,2.49,408,6,16,0.8
"Gal and Pyle, 2012, NWT OR 2012 009",well,Discovery Ridge H-55,300H556530126450,96E,65.404436,-126.9088099,Hare Indian,Bell Creek,rock chips,425,"DISCOVERY RIDGE H-55-425			",,52.11,12.72,6.2,1.86,9.48,0.46,2.12,0.61,0.1,0.07,0.011,60,13,14,99.75,1051,,<1,15,5.8,15.7,4.2,10.3,96.7,2,305.8,0.7,9.6,5.5,143,1.3,143.6,30.8,33.9,72.1,8.56,35,6.64,1.2,5.65,0.87,5.01,1.05,2.82,0.43,2.83,0.43,3.79,1.63,8.6,35,21.4,160,51.4,13.6,0.6,0.3,0.2,0.1,2.3,0.09,0.7,1.7,,70.6,0.8,14.84,0.05,0.53,430,468,0.11,1.33,3.47,2.14,428,3,15,0.8
"Gal and Pyle, 2012, NWT OR 2012 009",well,Discovery Ridge H-55,300H556530126450,96E,65.404436,-126.9088099,Hare Indian,Bell Creek,rock chips,435,"DISCOVERY RIDGE H-55-435			",,54.02,15.22,6.13,1.96,6.44,0.44,2.55,0.7,0.11,0.1,0.013,64,15,12.1,99.76,865,,3,16.9,6.7,17.3,3.9,11,119.9,3,272.1,0.7,11.6,5,165,2,143.1,31.2,37.5,78.3,9.18,33.8,6.55,1.34,5.54,0.92,5.61,1.09,3.16,0.47,3.08,0.47,2.8,1.09,6,34.3,22.6,132,55.5,12.4,0.4,0.2,0.3,0.1,1.9,0.07,0.7,1.9,,70.5,0.56,10.71,0.05,0.45,428,466,0.14,0.96,2.79,1.83,384,5,16,0.6
"Gal and Pyle, 2012, NWT OR 2012 009",well,Discovery Ridge H-55,300H556530126450,96E,65.404436,-126.9088099,Hare Indian,Bell Creek,rock chips,440,"DISCOVERY RIDGE H-55-440			",,53.05,15.67,6.49,2.06,6.39,0.45,2.51,0.73,0.12,0.12,0.013,63,16,12.2,99.77,822,,3,16.9,7.6,19.1,3.4,11.4,120.4,2,267.8,0.8,12,4.9,155,1.4,135.7,29.7,38.3,80.4,9.3,37.8,7.02,1.35,6.08,0.92,5.27,1.06,2.97,0.45,2.92,0.42,2.78,0.88,5.3,33,21.8,165,52.1,14.3,0.4,0.2,0.3,<0.1,0.9,0.07,0.6,1,,70.3,0.47,8.91,0.05,0.46,429,467,0.14,0.81,2.44,1.63,365,6,19,0.6
"Gal and Pyle, 2012, NWT OR 2012 009",well,Discovery Ridge H-55,300H556530126450,96E,65.404436,-126.9088099,Hare Indian,Bell Creek,rock chips,445,"DISCOVERY RIDGE H-55-445			",,54.66,16.65,6.52,2.1,4.61,0.44,2.66,0.76,0.12,0.12,0.014,68,16,11.1,99.78,779,,<1,19.3,8,20.1,4,11.6,129,3,240.4,0.9,12.8,4.4,163,1,144.1,30.8,39.6,87.2,9.68,36.4,6.81,1.35,5.97,0.92,5.57,1.07,2.9,0.45,2.83,0.46,2.17,0.69,4.1,31.2,22.9,166,52.9,14.3,0.5,0.2,0.3,<0.1,1.2,0.06,0.5,1,,70.2,0.39,6.91,0.05,0.39,430,468,0.03,0.62,2.09,1.47,331,1,19,0.5
"Gal and Pyle, 2012, NWT OR 2012 009",well,Discovery Ridge H-55,300H556530126450,96E,65.404436,-126.9088099,Hare Indian,Bell Creek,rock chips,455,"DISCOVERY RIDGE H-55-455			",,54.67,16.37,6.34,2.02,5.02,0.43,2.65,0.75,0.13,0.1,0.014,62,16,11.3,99.77,848,,2,17.2,7.9,18.7,4.2,12.1,127.5,3,253.3,1,12.5,4.4,169,1.4,145.9,29.6,39.7,84.2,9.61,38.5,7.09,1.34,5.87,0.92,5.39,1.01,3.1,0.44,3.09,0.44,2.32,0.85,4,31.6,22.8,145,51.7,13.2,0.4,0.2,0.3,<0.1,1.8,0.06,0.5,1,,70.4,0.31,5.66,0.05,0.46,431,469,0.23,0.53,1.87,1.34,303,12,25,0.7
"Gal and Pyle, 2012, NWT OR 2012 009",well,Discovery Ridge H-55,300H556530126450,96E,65.404436,-126.9088099,Hare Indian,Bell Creek,rock chips,465,"DISCOVERY RIDGE H-55-465			",,55.69,16.41,6.38,2.03,4.75,0.44,2.66,0.76,0.13,0.1,0.014,63,16,10.4,99.73,1180,,2,18.7,7.8,19.7,4.5,13.3,127,3,251.4,0.8,12.6,4.6,183,1,142.4,30.2,40.8,83.9,9.71,39.8,7.05,1.41,6,0.92,5.33,1.05,3.16,0.49,2.66,0.47,2.29,0.85,4.5,32.8,29.1,139,54,13.6,0.4,0.1,0.3,<0.1,1.6,0.06,0.5,1.2,,70.5,0.42,7.68,0.05,0.51,428,468,0.32,0.71,2.37,1.66,324,14,22,0.6
"Gal and Pyle, 2012, NWT OR 2012 009",well,Discovery Ridge H-55,300H556530126450,96E,65.404436,-126.9088099,Hare Indian,Bell Creek,rock chips,475,"DISCOVERY RIDGE H-55-475			",,50.95,14.14,7.01,2.05,8.49,0.44,2.24,0.67,0.13,0.12,0.013,58,14,13.5,99.73,1153,,2,16.3,6.2,16.4,4.4,12.2,104.1,2,297.5,0.9,11.8,4.6,145,1.3,146.1,30.9,38.6,83.1,9.24,36.8,7.4,1.36,6.47,0.98,5.83,1.08,2.95,0.45,3.07,0.45,3.35,1.26,5.4,29.6,21.6,111,49.5,14.5,0.4,0.2,0.3,<0.1,1.5,0.05,0.5,1.1,,70.6,0.39,7.09,0.05,0.48,427,467,0.05,0.64,2.11,1.47,336,2,23,0.5
"Gal and Pyle, 2012, NWT OR 2012 009",well,Discovery Ridge H-55,300H556530126450,96E,65.404436,-126.9088099,Hare Indian,Bell Creek,rock chips,485,"DISCOVERY RIDGE H-55-485			",,52.98,15.3,6.67,2.09,6.86,0.46,2.35,0.74,0.14,0.1,0.013,59,15,12,99.7,1566,,3,17.6,6.4,18.8,4.7,12.2,111.3,3,254,0.8,12.1,4,142,1.3,153.1,30.2,39.7,85.4,9.68,39.7,7.26,1.45,6.25,0.93,5.69,1.1,3.3,0.47,2.78,0.45,2.65,0.72,4.3,26.5,26.1,147,50.7,17.8,0.2,0.1,0.3,<0.1,1.3,0.06,0.4,0.9,,70.7,0.36,6.64,0.05,0.42,428,468,0.08,0.6,1.93,1.33,344,4,22,1
"Gal and Pyle, 2012, NWT OR 2012 009",well,Discovery Ridge H-55,300H556530126450,96E,65.404436,-126.9088099,Hare Indian,Bell Creek,rock chips,495,"DISCOVERY RIDGE H-55-495			",,53.51,15.93,7.3,2.21,5.61,0.45,2.42,0.79,0.14,0.1,0.014,60,16,11.3,99.72,1213,,5,17.8,6.8,18.7,4.7,13.1,115.3,3,241.4,0.9,12.9,3.9,147,1.2,156,31.4,42,91.2,10.07,39.1,7.45,1.47,6.52,1,5.81,1.14,3.3,0.45,3.11,0.47,2.25,0.84,2.8,25,23.7,133,49.3,15.8,0.2,<0.1,0.3,<0.1,1.4,0.07,0.4,0.8,,71,0.42,7.42,0.05,0.5,430,470,0.2,0.68,2.22,1.54,334,9,23,1.1
"Gal and Pyle, 2012, NWT OR 2012 009",well,Discovery Ridge H-55,300H556530126450,96E,65.404436,-126.9088099,Hare Indian,Bell Creek,rock chips,505,"DISCOVERY RIDGE H-55-505			",,53.99,17.18,7.12,2.2,4.52,0.45,2.49,0.84,0.14,0.09,0.014,58,17,10.7,99.73,972,,2,19.4,6.7,20.3,4.4,14.8,121.8,3,222.2,0.9,12.8,3.2,148,8.7,158.3,30.1,42.2,95,9.96,38,7.03,1.37,6.16,0.97,5.3,1.11,3.31,0.48,3.19,0.47,1.85,0.63,1.9,26.3,26.4,299,51.3,13.2,0.2,<0.1,0.3,<0.1,1,0.06,0.3,<0.5,,70.6,0.09,1.24,0.07,0.41,433,473,0.07,0.13,0.62,0.49,200,11,66,0.8
"Gal and Pyle, 2012, NWT OR 2012 009",well,Discovery Ridge H-55,300H556530126450,96E,65.404436,-126.9088099,Hare Indian,Bell Creek,rock chips,515,"DISCOVERY RIDGE H-55-515			",,53.79,17.73,7.28,2.2,4.06,0.46,2.54,0.85,0.14,0.09,0.015,58,18,10.6,99.75,763,,3,19.5,7.6,21.3,4.5,13.9,119.3,3,215.6,0.9,13.7,3.5,152,1.3,154.9,31.4,42.2,89.7,10.2,40.4,7.19,1.45,6.13,0.96,5.66,1.14,3.2,0.47,3.14,0.48,1.64,0.6,1.8,32.9,23.8,469,52.4,13.1,0.2,<0.1,0.3,<0.1,1.4,0.07,0.3,<0.5,,70.7,0.09,1.35,0.06,0.34,435,475,0.03,0.13,0.62,0.49,218,5,55,0.7
"Gal and Pyle, 2012, NWT OR 2012 009",well,Discovery Ridge H-55,300H556530126450,96E,65.404436,-126.9088099,Hare Indian,Bell Creek,rock chips,525,"DISCOVERY RIDGE H-55-525			",,53.42,17.75,7.62,2.23,3.75,0.46,2.56,0.84,0.16,0.1,0.014,61,18,10.8,99.75,788,,4,20.1,7.3,21.2,4.1,14.4,127,2,215.6,0.9,13.6,3.4,163,1.3,157.3,32.4,41.1,91.6,10.09,40.4,7.91,1.52,6.55,1.02,5.49,1.13,3.36,0.48,3.18,0.48,1.76,0.66,2.4,29.8,28.3,243,55.8,14.9,0.2,<0.1,0.3,<0.1,1.3,0.06,0.4,0.6,,70.2,0.12,1.54,0.07,0.35,433,473,0.02,0.15,0.79,0.64,195,3,44,0.6
"Gal and Pyle, 2012, NWT OR 2012 009",well,Discovery Ridge H-55,300H556530126450,96E,65.404436,-126.9088099,Hare Indian,Bell Creek,rock chips,535,"DISCOVERY RIDGE H-55-535			",,53.62,18.55,7.99,2.23,3.01,0.4,2.52,0.85,0.16,0.1,0.015,63,18,10.4,99.8,747,,2,21.4,7.8,22.4,4.5,13.5,127.4,3,206.4,0.9,13.6,3.3,154,11.7,158,30.8,41.5,90.2,10.27,41.1,7.64,1.61,6.74,1.04,6.18,1.1,3.19,0.48,3.02,0.48,1.49,0.89,1.6,27.4,26.5,176,54.2,16.5,0.1,<0.1,0.3,<0.1,1,0.05,0.4,<0.5,,70.7,0.08,0.71,0.1,0.33,435,475,0.03,0.08,0.48,0.4,148,6,69,0.4
"Gal and Pyle, 2012, NWT OR 2012 009",well,Discovery Ridge H-55,300H556530126450,96E,65.404436,-126.9088099,Hare Indian,Bluefish,rock chips,545,"DISCOVERY RIDGE H-55-545			",,53.3,19.35,7.31,2.26,2.72,0.4,2.66,0.85,0.16,0.08,0.017,60,19,10.7,99.8,674,,3,21.5,8.8,23.2,4.1,14.2,133.5,4,202.5,0.9,14.6,3.3,158,1.5,150.1,31.3,44.7,92.6,10.7,39.7,7.88,1.63,6.94,1.03,5.88,1.14,3.29,0.44,3.07,0.5,1.35,0.63,2.3,25.8,21.5,180,52.1,10.1,0.2,<0.1,0.3,<0.1,0.7,0.03,0.3,<0.5,,70.8,0.42,7.76,0.05,0.33,427,467,0.11,0.7,2.13,1.43,364,5,15,0.4
"Gal and Pyle, 2012, NWT OR 2012 009",well,Discovery Ridge H-55,300H556530126450,96E,65.404436,-126.9088099,Hare Indian,Bluefish,rock chips,550,"DISCOVERY RIDGE H-55-550			",,53.16,18.92,6.78,2.2,3.1,0.39,2.66,0.82,0.15,0.07,0.016,82,18,11.5,99.79,643,,3,19.6,9.2,23.5,3.8,14.7,138.4,3,215.3,0.9,13.4,6,189,2.6,139.2,32.6,42.7,91,10.17,36.9,7.24,1.42,6.27,0.96,5.51,1.06,3.1,0.45,2.91,0.48,2.08,0.97,6.2,29.9,21.8,181,69.8,12.1,0.7,0.1,0.3,<0.1,2.3,0.06,0.7,1.2,,70.4,1.32,16.98,0.07,0.44,437,477,0.19,1.55,4.44,2.89,382,4,10,1.3
"Pyle and Gal, 2012, NWT OR 2012 008",outcrop,Dodo Canyon,,96E,65.008343,-127.344023,Bluefish,Bluefish,rock pulp,0 to 1,11DC-001,,59.93,9.92,2.29,0.94,6.81,0.09,1.98,0.46,0.11,<0.01,0.021,239,10,17.1,99.7,674,,<1,6.4,5.8,11.6,2.4,8.2,89.7,2,343.3,0.5,6.4,18.8,748,0.8,98.1,36,35.6,46.4,7.72,33,5.56,1.07,5.18,0.83,4.56,0.99,3.21,0.42,2.86,0.4,8.18,1.23,38.5,75,12.3,275,180.7,9.9,20,1.6,0.2,0.4,<0.5,0.23,<0.1,19.8,,70.6,1.28,14.87,0.08,0.52,448,487,0.2,1.37,7.46,6.09,199,3,7,1.5
"Pyle and Gal, 2012, NWT OR 2012 008",outcrop,Dodo Canyon,,96E,65.008343,-127.344023,Bluefish,Bluefish,rock pulp,1 to 2,11DC-002,,72.43,8.82,1.85,0.82,1.44,0.08,1.79,0.38,0.08,<0.01,0.016,158,8,12.1,99.79,756,,<1,5.3,5.6,11.2,2.2,7.8,93.1,1,133.7,0.4,4.8,9.6,447,0.8,79.4,21.3,24.7,35.8,5.14,20.8,3.33,0.61,2.93,0.46,2.85,0.62,1.89,0.28,1.86,0.29,6.7,1.03,24.5,47.6,9.5,119,113.4,7.3,7.5,1,0.1,0.3,<0.5,0.23,<0.1,17.2,,70.4,1.44,12.63,0.1,0.32,452,491,0.13,1.19,6.28,5.09,201,2,5,0.4
"Pyle and Gal, 2012, NWT OR 2012 008",outcrop,Dodo Canyon,,96E,65.008343,-127.344023,Bluefish,Bluefish,rock pulp,2 to 3,11DC-003,,73.08,8,1.95,0.76,1.55,0.08,1.64,0.37,0.09,<0.01,0.016,180,8,12.2,99.75,798,,2,5.1,4.8,11,1.9,7.4,86.3,2,138.1,0.4,5.1,12,608,0.9,81,25.4,25.1,35.9,5.36,20.6,3.63,0.77,3.32,0.54,3.06,0.72,2.18,0.29,1.9,0.3,7.03,1.04,50.2,65.2,12.9,262,141.8,9,17.2,1.4,0.1,0.4,<0.5,0.2,<0.1,16.1,,70.6,1.51,12.48,0.11,0.51,451,490,0.32,1.2,6.57,5.37,190,5,8,0.4
"Pyle and Gal, 2012, NWT OR 2012 008",outcrop,Dodo Canyon,,96E,65.008343,-127.344023,Bluefish,Bluefish,rock pulp,3 to 4,11DC-004,,23.58,3.08,1.22,1.03,36.39,0.03,0.67,0.14,0.04,0.03,0.004,84,3,33.5,99.7,867,,<1,3.9,2,3.9,0.7,3.1,34.1,<1,943.5,0.2,1.9,7.5,203,<0.5,38.4,13.6,11.9,16,2.46,10.2,1.9,0.38,1.73,0.28,1.55,0.32,1,0.16,0.93,0.13,11.57,0.66,26.2,27.9,4.4,91,58.7,5.4,4.1,0.9,<0.1,<0.1,<0.5,0.11,<0.1,5.5,,70.4,1.03,7.43,0.12,0.38,447,486,0.04,0.72,3.64,2.92,204,1,10,8.6
"Pyle and Gal, 2012, NWT OR 2012 008",outcrop,Dodo Canyon,,96E,65.008343,-127.344023,Bluefish,Bluefish,rock pulp,4 to 5,11DC-005,,60.73,8.77,2.34,2.47,6.1,0.08,1.82,0.45,0.1,0.02,0.015,189,10,16.7,99.67,822,,<1,8.7,5.9,14.3,2.6,10.3,91.1,6,336.5,0.5,6.4,16.2,610,0.8,108.3,33.6,31.8,41.7,7.28,25.8,4.87,1.09,5.2,0.82,3.83,0.94,2.86,0.44,2.62,0.52,8.15,1.29,44.1,67.5,11.5,199,137.2,13,17.4,1.9,0.1,0.3,<0.5,0.19,<0.1,14.6,,70.5,1.29,11.64,0.1,0.43,450,489,0.23,1.1,6.22,5.12,187,4,7,1.8
"Pyle and Gal, 2012, NWT OR 2012 008",outcrop,Dodo Canyon,,96E,65.008343,-127.344023,Canol,Canol,rock pulp,5 to 6,11DC-006,,69.6,8.49,1.94,0.87,2.51,0.08,1.76,0.45,0.12,<0.01,0.014,247,9,13.8,99.66,939,,2,8,4.9,11.4,2.9,8.9,87.4,2,190.1,0.5,5.9,22.6,788,1,113.3,37.1,33.8,46.1,7.79,31.8,5.91,1.17,5.57,0.89,4.96,1.06,2.82,0.46,2.61,0.42,7.8,1.25,65.4,89.4,13.4,390,193.7,12.4,27.1,3.4,0.2,0.4,<0.5,0.24,0.2,18.3,,70.2,1.68,13.99,0.11,0.36,449,488,0.18,1.32,7.15,5.83,196,3,5,0.6
"Pyle and Gal, 2012, NWT OR 2012 008",outcrop,Dodo Canyon,,96E,65.008343,-127.344023,Canol,Canol,rock pulp,6 to 9,11DC-007,,49.17,7.55,3.1,5.57,10.89,0.06,1.46,0.34,0.1,0.04,0.01,171,7,21.3,99.65,941,,2,7.7,5,10.1,1.8,7.3,78.1,1,552.7,0.4,4.9,12.5,412,0.7,70.9,25.9,24.1,33.4,4.9,20.6,3.3,0.65,3.27,0.52,3.16,0.66,1.99,0.29,1.73,0.26,8.08,1,43.2,39.9,9.2,180,130.2,15.1,8.2,2.1,<0.1,0.2,<0.5,0.15,0.3,10,,70.2,1.35,8.15,0.14,0.32,448,487,0.09,0.81,4.23,3.42,193,2,8,4.1
"Pyle and Gal, 2012, NWT OR 2012 008",outcrop,Dodo Canyon,,96E,65.008343,-127.344023,Canol,Canol,rock pulp,9 to 12,11DC-008,,69.04,7.9,2.28,0.82,4.51,0.08,1.48,0.32,0.09,<0.01,0.012,154,7,13.1,99.67,1388,,<1,7.5,5.2,10.4,1.7,6.4,79.7,2,267.5,0.3,4.4,15.1,514,<0.5,56.3,31.8,24.7,35.8,5.53,22.2,3.96,0.79,3.97,0.64,3.35,0.83,2.2,0.36,2.24,0.3,6.29,1.21,71.2,49.2,7.5,241,116.4,15.9,3.8,1.3,<0.1,0.4,<0.5,0.17,0.3,6.6,,70.5,1.21,11.29,0.1,0.36,450,489,0.19,1.06,5.22,4.16,216,4,7,1.1
"Pyle and Gal, 2012, NWT OR 2012 008",outcrop,Dodo Canyon,,96E,65.008343,-127.344023,Canol,Canol,rock pulp,18 to 21,11DC-009,,71.79,4.39,1.52,2.02,5.01,0.07,0.79,0.17,0.1,0.02,0.009,95,4,13.8,99.69,1454,,<1,4.2,2,6.1,0.9,3.6,39.4,<1,404.9,0.2,2.7,11.9,327,0.7,35.8,27.4,18,23.3,3.7,15.8,3.21,0.64,3.41,0.53,2.79,0.65,1.84,0.29,1.66,0.24,7.45,0.89,44.1,42.3,6.2,140,61,11.3,2.4,1.3,<0.1,0.3,<0.5,0.1,0.2,4.6,,70,3.1,13.29,0.19,0.32,443,482,0.11,1.38,5.69,4.31,234,2,6,1.6
"Pyle and Gal, 2012, NWT OR 2012 008",outcrop,Dodo Canyon,,96E,65.008343,-127.344023,Canol,Canol,rock pulp,21 to 24,11DC-010,,77.87,5.21,1.39,0.66,2.18,0.08,0.98,0.22,0.1,<0.01,0.01,94,5,11,99.73,1464,,<1,3.5,2.7,7.2,0.9,4.5,48.3,<1,232.1,0.3,3.5,11,413,1.1,43.5,24,18,26.6,4.14,18.3,3.39,0.65,3.29,0.48,2.72,0.6,1.76,0.26,1.58,0.26,6.37,0.7,38.7,42.6,8,155,63.2,9.9,4.4,1.3,<0.1,0.3,<0.5,0.07,0.2,3.7,,70.4,1.8,12.87,0.12,0.4,446,485,0.1,1.24,5.72,4.48,225,2,7,0.6
"Pyle and Gal, 2012, NWT OR 2012 008",outcrop,Dodo Canyon,,96E,65.008343,-127.344023,Canol,Canol,rock pulp,24 to 27,11DC-011,,77.92,5.52,1.52,0.59,1.67,0.08,1.05,0.24,0.1,<0.01,0.01,108,5,11,99.73,1457,,<1,4,2.7,7.4,1.3,4.7,51.9,<1,207.1,0.3,3.6,11.9,410,0.8,46.5,22.9,18.9,27.2,4.22,15.5,3.62,0.66,3.38,0.52,2.77,0.6,1.88,0.27,1.52,0.25,5.59,0.76,35.2,49.9,8.5,168,75.1,11.5,5.2,1.6,<0.1,0.4,<0.5,0.11,0.2,5.4,,70.7,1.91,13.05,0.13,0.45,444,483,0.15,1.28,5.99,4.71,218,3,8,0.5
"Pyle and Gal, 2012, NWT OR 2012 008",outcrop,Dodo Canyon,,96E,65.008343,-127.344023,Canol,Canol,rock pulp,27 to 30,11DC-012,,81.05,4.69,1.45,0.37,1,0.08,0.88,0.2,0.07,<0.01,0.009,113,5,9.9,99.74,1453,,1,5.4,2.4,6.7,1.2,3.6,45.2,<1,166.1,0.2,3.2,9.9,285,0.8,38.4,20.6,16.4,23.4,3.69,15.6,2.92,0.57,3.22,0.47,2.62,0.58,1.51,0.24,1.22,0.23,5.79,0.75,36.5,50.7,9.2,192,89.3,10.3,3.5,1.4,<0.1,0.3,<0.5,0.1,0.2,4.4,,70.5,2.12,12.55,0.14,0.41,443,482,0.08,1.24,5.62,4.38,223,1,7,0.3
"Pyle and Gal, 2012, NWT OR 2012 008",outcrop,Dodo Canyon East,,96E,65.007744,-127.324858,Canol,Canol,rock pulp,0 to 3,11DCE-001,,71.32,3.56,0.9,2.82,5.89,0.07,0.62,0.14,0.06,0.03,0.008,64,3,14.3,99.71,1456,,<1,1.9,1.7,5.1,0.8,2.8,31.1,<1,423.8,0.2,2.1,6.4,265,0.7,26.8,14.7,13.6,18.5,2.77,11.8,1.46,0.19,1.35,0.23,1.36,0.32,0.93,0.17,0.95,0.16,7.05,0.54,32.9,18.1,4.6,38,33,6.9,0.7,1,<0.1,0.2,<0.5,0.07,<0.1,3.3,,70.1,2.28,10.93,0.17,0.33,443,482,0.05,1.11,4.84,3.73,226,1,7,2.08
"Pyle and Gal, 2012, NWT OR 2012 008",outcrop,Dodo Canyon East,,96E,65.007744,-127.324858,Canol,Canol,rock pulp,3 to 6,11DCE-002,,80.14,5.41,1.31,0.42,1.36,0.08,1.06,0.25,0.06,<0.01,0.008,63,4,9.7,99.77,1461,,<1,6,2.4,8.2,1.4,4.6,51.7,1,125.2,0.4,3.8,8.1,301,0.7,51.6,12.8,15.2,25.4,3.22,12.4,1.87,0.29,1.55,0.27,1.78,0.37,1.15,0.19,1.23,0.18,5.3,0.83,35,30.7,9.1,63,40.8,9.2,0.5,1.2,<0.1,0.3,<0.5,0.16,0.2,3.8,,70.4,1.84,11.72,0.14,0.3,443,482,0.18,1.15,5.03,3.88,233,4,6,0.27
"Pyle and Gal, 2012, NWT OR 2012 008",outcrop,Dodo Canyon East,,96E,65.007744,-127.324858,Canol,Canol,rock pulp,6 to 9,11DCE-003,,75.52,5.41,1.56,0.85,2.93,0.09,1.05,0.23,0.08,<0.01,0.009,138,6,11.9,99.65,1921,,2,8.9,2.7,7.5,1.2,4.6,50.1,1,271.8,0.4,3.6,13.1,403,0.8,45.4,24,18.2,26.7,4.05,16.3,3.01,0.54,3.04,0.49,2.8,0.64,1.71,0.28,1.69,0.27,6.67,1.15,44.6,52.3,8,279,108.8,11.3,3.9,1.6,<0.1,0.4,<0.5,0.11,0.2,5.3,,70.5,2.96,14.55,0.17,0.29,444,483,0,1.46,5.82,4.36,250,0,5,0.79
"Pyle and Gal, 2012, NWT OR 2012 008",outcrop,Dodo Canyon East,,96E,65.007744,-127.324858,Canol,Canol,rock pulp,9 to 12,11DCE-004,,76.05,4.94,1.49,0.88,2.88,0.08,0.95,0.21,0.1,<0.01,0.01,144,5,12,99.65,1847,,<1,8.5,2.1,7.2,1.1,4.3,47.1,<1,287.4,0.3,3.2,15.3,397,1,44.3,26.6,19.1,25.9,3.99,17.2,3.13,0.65,3.52,0.51,2.83,0.62,2.05,0.29,1.62,0.28,6.51,1.15,34.6,51.5,8.6,241,116.9,11.5,4.1,2,<0.1,0.4,<0.5,0.1,0.2,7.2,,70.1,3.1,14.71,0.17,0.31,442,481,0.09,1.5,5.89,4.39,250,2,5,0.8
"Pyle and Gal, 2012, NWT OR 2012 008",outcrop,Dodo Canyon East,,96E,65.007744,-127.324858,Canol,Canol,rock pulp,12 to 15,11DCE-005,,67.91,5.05,1.33,3.3,6.22,0.08,0.96,0.21,0.09,0.04,0.008,100,5,14.4,99.59,1787,,2,7.9,2.4,6.3,1.4,7.1,43.9,6,532.4,0.4,3.9,9.8,368,0.9,41.5,20.8,17.7,27.2,3.98,14.9,3.09,0.57,3.14,0.49,2.39,0.63,1.59,0.25,1.75,0.26,6.73,1.02,32,38.6,6.9,208,80,8.6,2.9,1.3,<0.1,0.2,<0.5,0.08,0.2,4.9,,70.8,2.43,10.86,0.18,0.32,443,482,0.11,1.12,4.41,3.29,246,2,7,2.21
"Pyle and Gal, 2012, NWT OR 2012 008",outcrop,Dodo Canyon East,,96E,65.007744,-127.324858,Canol,Canol,rock pulp,15 to 18,11DCE-006,,72.38,7.07,2.66,0.79,1.74,0.09,1.51,0.37,0.13,0.01,0.012,173,7,12.9,99.65,1693,,<1,16.3,3.6,10,2.2,6.9,69.4,1,214.5,0.5,5.7,21.2,415,1.3,83.4,33,27.4,45.7,6.05,24.1,4.75,0.95,4.69,0.71,3.69,0.85,2.38,0.38,2.12,0.36,6.95,2.01,70.5,97.5,19.8,249,156.4,16.7,2.9,1.8,0.2,0.4,<0.5,0.26,0.2,8.2,,70.1,2.44,14.59,0.14,0.26,446,485,0.06,1.43,6.77,5.34,216,1,4,0.45
"Pyle and Gal, 2012, NWT OR 2012 008",outcrop,Dodo Canyon East,,96E,65.007744,-127.324858,Canol,Canol,rock pulp,18 to 21,11DCE-007,,65.65,6.91,2.97,0.87,6.49,0.11,1.49,0.37,0.11,0.01,0.008,101,8,14.7,99.68,1663,,2,16.4,3.6,9.5,2.4,6.3,63,5,290.8,0.6,5.2,16.6,222,0.6,78.8,27.2,24,44.1,6.1,23.9,4.82,0.95,4.4,0.67,3.6,0.87,2.06,0.32,2.16,0.37,7.44,2.13,41.5,70.3,13.8,132,83.7,12.6,1.8,1,0.1,0.3,<0.5,0.34,0.1,4.2,,70.6,2.13,12.86,0.14,0.27,447,486,0.01,1.25,5.89,4.64,218,0,5,1.4
"Pyle and Gal, 2012, NWT OR 2012 008",outcrop,Dodo Canyon East,,96E,65.007744,-127.324858,Canol,Canol,rock pulp,21 to 24,11DCE-008,,47.37,5.87,2.91,4.66,13.76,0.07,1.3,0.3,0.1,0.04,0.007,87,7,23.2,99.63,1465,,<1,16,2.4,8.9,1.8,6.3,51.5,2,602,0.5,4.6,12.2,120,1.2,66.7,24.7,23,41.4,5.24,22.5,3.93,0.76,3.97,0.59,3.27,0.7,1.97,0.3,1.8,0.29,10.39,2.04,26,49.9,11,101,66.1,10.7,1.4,0.8,0.2,0.2,<0.5,0.29,0.1,5.3,,70.5,1.64,13.02,0.11,0.4,449,488,0.04,1.24,6.09,4.85,214,1,7,4.15
"Pyle and Gal, 2012, NWT OR 2012 008",outcrop,Dodo Canyon East,,96E,65.007744,-127.324858,Canol,Canol,rock pulp,24 to 27,11DCE-009,,61.19,5.86,3.27,3,6.26,0.08,1.22,0.3,0.3,0.06,0.01,124,8,18.1,99.64,1561,,3,22.4,2.7,8.7,1.6,6.1,51,2,412.8,0.3,4.3,17.6,197,1.2,64.2,37.1,27.6,47.4,6.16,25.9,5.39,1.1,5.77,0.87,4.5,0.96,2.64,0.39,2.27,0.38,9.22,2.35,28.8,89.7,13.1,182,108.6,14.5,4.7,1,0.2,0.4,<0.5,0.35,0.1,6.9,,70.3,2.88,15.83,0.15,0.26,448,487,0.15,1.57,8.36,6.79,189,2,3,2
"Pyle and Gal, 2012, NWT OR 2012 008",outcrop,Dodo Canyon East,,96E,65.007744,-127.324858,Canol,Canol,rock pulp,27 to 30,11DCE-010,,75.32,4.17,1.72,0.42,4.63,0.08,0.85,0.21,0.07,0.01,0.006,113,5,12.2,99.72,1724,,<1,13.7,1.7,5.7,1.7,4.2,37,<1,214.6,0.3,3,13.7,177,0.6,54.4,26.7,14.9,25.6,3.49,16.1,3.27,0.63,3.75,0.57,3.31,0.69,2.11,0.28,1.68,0.29,6.71,1.48,35.8,53.6,10.3,127,82,9.1,1.8,1.1,<0.1,0.2,<0.5,0.2,0.2,5.4,,70.7,3.01,13.22,0.19,0.28,445,484,0.12,1.36,5.67,4.31,233,2,5,0.99
"Pyle and Gal, 2012, NWT OR 2012 008",outcrop,Dodo Canyon East,,96E,65.007744,-127.324858,Canol,Canol,rock pulp,30 to 33,11DCE-011,,55.32,5.58,1.56,3.79,12.15,0.07,1.15,0.3,0.25,0.08,0.007,50,5,19.3,99.58,1920,,6,7.6,2.6,6.4,2.1,7.1,50.4,5,745.1,0.4,3.9,9.6,239,0.8,71.9,22.6,22.6,35.5,4.4,19.8,2.6,0.51,1.94,0.33,2.24,0.67,1.62,0.26,2.11,0.28,7.74,1.34,24.7,34.2,11,35,37.8,6.9,0.5,1.1,0.3,0.3,<0.5,0.23,0.3,3.9,,70.5,1.73,8.69,0.17,0.36,443,482,0.05,0.88,4.4,3.52,198,1,8,4.33
"Pyle and Gal, 2012, NWT OR 2012 008",outcrop,Dodo Canyon East,,96E,65.007744,-127.324858,Canol,Canol,rock pulp,33 to 36,11DCE-012,,70.01,7.94,2.87,0.74,2.36,0.08,1.64,0.4,0.04,0.01,0.008,85,7,13.6,99.68,1957,,4,23.2,3.8,10.6,2.3,10.9,76.7,5,205.6,0.5,6.2,13.6,221,1.1,85.6,21.3,26.6,46.1,5.97,17.3,3.66,0.72,2.81,0.5,2.58,0.57,2.2,0.29,1.77,0.28,5.79,2.84,30.4,55.9,16.5,89,61,12.5,1.7,1.4,0.3,0.5,<0.5,0.34,0.4,6.1,,70.8,1.63,9.66,0.14,0.27,441,480,0.02,0.95,5.58,4.63,173,0,5,0.48
"Pyle and Gal, 2012, NWT OR 2012 008",outcrop,Dodo Canyon East,,96E,65.007744,-127.324858,Canol,Canol,rock pulp,36 to 39,11DCE-013,,68.31,9.11,3.63,0.92,2.6,0.1,1.93,0.49,0.1,0.01,0.012,110,9,12.5,99.68,1844,,<1,33.3,4.2,12.6,2.7,9,86,2,199.5,0.5,7.6,17.8,179,1.1,111.5,25.5,30.4,58.3,6.88,27.2,5.06,0.96,4.67,0.72,3.84,0.85,2.35,0.37,2.04,0.34,5.66,2.51,39.6,83.5,19.5,171,87.6,18.5,2.7,1.5,0.3,0.4,0.8,0.26,0.4,5,,70.5,1.73,10.38,0.14,0.34,444,483,0,1.02,5.17,4.15,201,0,7,0.67
"Pyle and Gal, 2012, NWT OR 2012 008",outcrop,Dodo Canyon East,,96E,65.007744,-127.324858,Canol,Canol,rock pulp,39.5,11DCE-014,,71.88,7.02,3.12,0.73,3.5,0.09,1.45,0.37,0.07,0.02,0.009,129,7,11.4,99.69,1746,,1,27.4,3.3,10.1,2.3,8.5,65.5,1,217.7,0.5,5.4,14.3,203,1,84.8,25.3,24.9,45,5.49,21.7,4.22,0.77,4.39,0.67,3.86,0.77,2.05,0.33,1.76,0.3,5.36,2.19,29.5,65.5,15.2,199,111.9,16.3,2.5,1.7,0.2,0.4,<0.5,0.23,0.5,6.3,,70.6,1.89,10.34,0.15,0.34,445,484,0.04,1.03,4.55,3.52,227,1,7,0.82
"Pyle and Gal, 2012, NWT OR 2012 008",outcrop,Dodo Canyon East,,96E,65.007744,-127.324858,Canol,Canol,rock pulp,39 to 42,11DCE-014A,,20.36,6.04,28.3,0.31,2.62,0.05,1.1,0.33,0.02,<0.01,0.019,38,4,40.7,99.83,871,,<1,2,2.6,7,1.4,5.2,49,2,130.9,0.3,2.2,3.9,133,2.2,58.1,7.8,15.9,30.6,3.51,13.8,1.64,0.22,0.99,0.14,1.09,0.22,0.79,0.13,0.78,0.13,3.97,29.34,7.1,13.4,5.1,9,12.7,110.1,0.2,7.9,<0.1,4.3,<0.5,2.62,0.2,32,,50.4,0.72,0.16,0.82,1.32,378,417,0.84,0.16,3.38,3.22,5,25,39,0.44
"Pyle and Gal, 2012, NWT OR 2012 008",outcrop,Dodo Canyon East,,96E,65.007744,-127.324858,Canol,Canol,rock pulp,42 to 45,11DCE-015,,74.54,7.65,2.78,0.47,1.4,0.09,1.59,0.41,0.09,<0.01,0.01,80,6,10.7,99.72,1750,,2,16.8,3.2,10.6,2.7,7.9,71.6,1,168,0.6,6.1,9.5,196,0.9,86.7,16.5,27.8,51.1,5.83,23.3,3.59,0.58,2.69,0.41,2.26,0.53,1.58,0.26,1.49,0.24,4.71,2.06,22.6,61,17,99,63.5,14.4,1.8,1.3,0.2,0.4,<0.5,0.25,0.4,5.9,,70.5,1.76,9.09,0.16,0.34,443,482,0.03,0.92,4.43,3.51,205,1,8,0.28
"Pyle and Gal, 2012, NWT OR 2012 008",outcrop,Dodo Canyon East,,96E,65.007744,-127.324858,Canol,Canol,rock pulp,45 to 48,11DCE-016,,77.3,7.03,2.33,0.44,0.65,0.09,1.35,0.38,0.06,<0.01,0.01,60,6,10.1,99.78,1356,,3,9.6,2.3,9.2,2.3,6.6,54.8,1,120.3,0.5,5.7,9.1,142,1.5,77.8,12.7,20.2,43,5.12,20.3,3.16,0.5,1.86,0.31,1.54,0.38,1.26,0.22,1.29,0.22,4.33,1.74,28.1,47.5,18.9,31,43.7,14,0.5,1.4,0.3,0.3,0.9,0.3,0.6,4.8,,70.9,1.96,9.05,0.18,0.25,436,475,0.11,0.93,4.49,3.56,202,2,6,0.14
"Pyle and Gal, 2012, NWT OR 2012 008",outcrop,Dodo Canyon East,,96E,65.007744,-127.324858,Canol,Canol,rock pulp,48 to 51,11DCE-017,,79.97,6.58,1.74,0.33,0.38,0.09,1.26,0.33,0.04,<0.01,0.007,37,6,9.1,99.79,1418,,<1,6.9,2.8,9.5,1.8,6.4,52.7,1,100.1,0.5,5.6,8.7,98,0.7,69.3,11.4,19.7,38.8,4.58,16.3,2.73,0.49,1.72,0.29,1.78,0.44,1.16,0.19,1.27,0.21,4.01,1.46,24.5,35,13.7,9,26.3,8.3,0.1,0.7,0.2,0.3,<0.5,0.27,0.4,3,,70.8,1.79,9.06,0.17,0.33,442,481,0.16,0.92,4,3.08,226,4,8,0.09
"Pyle and Gal, 2012, NWT OR 2012 008",outcrop,Dodo Canyon East,,96E,65.007744,-127.324858,Canol,Canol,rock pulp,51 to 54,11DCE-018,,70.87,11.13,3.52,0.64,0.26,0.11,2.37,0.52,0.05,<0.01,0.012,81,8,10.2,99.72,1625,,3,15,4.6,14.8,3.3,9.7,95.5,2,126.9,0.7,7,12.2,231,1.6,101.6,20.1,29.1,56.5,6.8,23.1,3.98,0.63,2.25,0.43,2.64,0.55,1.82,0.3,1.89,0.32,3.59,2.62,36.4,86.7,23.9,110,68.8,19,1.6,1.1,0.3,0.5,<0.5,0.4,0.5,7.2,,71,1.21,6.87,0.15,0.3,445,484,0.07,0.69,3.81,3.12,180,2,8,0.15
"Pyle and Gal, 2012, NWT OR 2012 008",outcrop,Dodo Canyon East,,96E,65.007744,-127.324858,Canol,Canol,rock pulp,54 to 57,11DCE-019,,75.74,9.16,1.55,0.52,0.35,0.1,1.98,0.43,0.05,<0.01,0.009,38,6,9.8,99.73,1622,,5,3.5,3.9,12,2.7,9.4,80,<1,119.1,0.6,5.2,8.1,160,0.9,86,17,24.3,47.2,5.8,22.7,3.44,0.54,2.2,0.35,2.1,0.5,1.63,0.27,1.67,0.27,4.26,1.26,24.4,26.2,14,12,21.5,7.5,0.1,0.9,0.2,0.3,<0.5,0.28,0.2,4,,70.2,1.14,8.59,0.12,0.29,445,484,0.05,0.82,4.44,3.62,193,1,7,0.12
"Pyle and Gal, 2012, NWT OR 2012 008",outcrop,Dodo Canyon East,,96E,65.007744,-127.324858,Canol,Canol,rock pulp,57 to 60,11DCE-020,,71.5,10.22,3.29,0.78,0.62,0.12,2.23,0.46,0.07,0.01,0.011,79,9,10.4,99.71,1665,,5,11.3,4.5,12.4,2.7,7.7,92.3,1,122.1,0.5,6.6,13.8,233,1.2,85.2,24.3,25.9,49.3,6.1,20.7,4.3,0.9,3.7,0.59,3.35,0.76,2.34,0.31,2.05,0.31,4.25,2.25,31.3,65.9,15.1,156,65.3,13.3,1.7,1,0.2,0.3,<0.5,0.27,0.3,4.3,,70.2,1.41,8.58,0.14,0.28,445,484,0.02,0.84,4.24,3.4,202,0,7,0.24
"Pyle and Gal, 2012, NWT OR 2012 008",outcrop,Dodo Canyon East,,96E,65.007744,-127.324858,Canol,Canol,rock pulp,60 to 63,11DCE-021,,78.26,4.78,1.54,0.53,0.9,0.08,0.95,0.22,0.03,<0.01,0.006,53,4,12.5,99.76,1611,,1,4.4,2.2,6.7,1.3,4,42.6,<1,97.5,0.4,3.1,11,190,0.9,42.3,12.2,17.5,30.7,4.34,15.4,2.65,0.49,1.64,0.25,1.36,0.3,0.97,0.15,1.05,0.18,7.13,1.43,54.1,26.9,9.7,28,33,8.3,0.5,0.9,0.2,0.3,<0.5,0.19,0.2,5.7,,70.8,2.57,16.34,0.14,0.3,443,482,0.16,1.59,7.13,5.54,229,2,4,0.29
"Pyle and Gal, 2012, NWT OR 2012 008",outcrop,Dodo Canyon East,,96E,65.007744,-127.324858,Canol,Canol,rock pulp,63 to 66,11DCE-022,,83.77,4.37,1.43,0.24,0.03,0.07,0.8,0.19,0.02,<0.01,0.007,70,4,8.8,99.79,1526,,3,4.7,1.8,5.7,0.9,3.9,36.5,<1,80.8,0.2,3,10,196,0.6,33.8,9.9,15.6,23.9,3.53,11.3,1.94,0.29,1.19,0.17,0.86,0.24,0.82,0.15,0.9,0.15,5.2,1.13,54.2,45.2,8.7,14,48,8.4,0.2,1.3,0.1,0.3,<0.5,0.17,0.3,6.8,,70.8,2.22,13.36,0.14,0.32,443,482,0.09,1.31,5.42,4.11,246,2,6,0.08
"Pyle and Gal, 2012, NWT OR 2012 008",outcrop,Dodo Canyon East,,96E,65.007744,-127.324858,Canol,Canol,rock pulp,66 to 69,11DCE-023,,88.46,3.31,0.67,0.17,0.03,0.07,0.52,0.14,0.02,<0.01,0.007,43,2,6.4,99.83,1295,,2,1.9,1.3,4.1,0.9,2.6,24.4,<1,66.3,0.3,2.2,6.6,257,<0.5,25.6,8,11.7,18.2,2.8,9.6,1.68,0.34,0.95,0.13,0.82,0.17,0.54,0.11,0.7,0.12,3.53,0.55,27.7,21.6,5.6,17,19.6,4.3,0.1,1,<0.1,0.2,<0.5,0.1,0.4,4.9,,70.7,1.54,8.93,0.15,0.23,442,481,0.03,0.88,3.68,2.8,243,1,6,0.06
"Pyle and Gal, 2012, NWT OR 2012 008",outcrop,Dodo Canyon East,,96E,65.007744,-127.324858,Canol,Canol,rock pulp,69 to 72,11DCE-024,,85.31,3.98,1.21,0.3,0.24,0.07,0.67,0.19,0.03,<0.01,0.009,73,4,7.8,99.77,1299,,3,3.7,1.5,4.7,0.9,3.7,31,<1,91.1,0.2,2.9,11.8,359,0.7,30.8,11.9,13,22.6,3.03,12,1.83,0.37,1.62,0.21,1.3,0.3,0.96,0.14,0.94,0.14,4.22,0.88,49.7,50.3,7.9,73,53,12.8,1.1,1.6,0.1,0.3,<0.5,0.11,0.4,6.1,,70.7,1.96,10.25,0.16,0.23,440,479,0.01,1.02,4.34,3.32,236,0,5,0.11
"Pyle and Gal, 2012, NWT OR 2012 008",outcrop,Dodo Canyon East,,96E,65.007744,-127.324858,Canol,Canol,rock pulp,72 to 75,11DCE-025,,83.6,4.8,1.35,0.3,0.32,0.07,0.91,0.24,0.05,<0.01,0.008,61,5,8.1,99.74,1328,,1,4,2.2,5.7,1.1,4.8,41.5,<1,102.8,0.4,3.3,10.6,564,<0.5,44.4,14.6,16,25.9,3.59,13.6,2.21,0.41,1.68,0.25,1.53,0.35,1.28,0.18,1.1,0.17,3.84,1.08,43.6,48,7.4,103,46.3,14.4,1.1,2.1,0.2,0.3,<0.5,0.1,0.7,6.7,,70.7,2.14,9.54,0.18,0.32,439,478,0.09,0.99,4.01,3.02,238,2,8,0.08
"Pyle and Gal, 2012, NWT OR 2012 008",outcrop,Dodo Canyon East,,96E,65.007744,-127.324858,Canol,Canol,rock pulp,75 to 78,11DCE-026,,85.95,4.71,0.9,0.27,0.1,0.07,0.93,0.25,0.02,<0.01,0.011,46,4,6.5,99.75,1359,,<1,2.6,1.9,5.7,1.5,4.6,38.9,<1,90.1,0.4,3.6,8,530,0.8,48,12.6,16.2,27.3,3.66,13.5,2.27,0.37,1.44,0.21,1.47,0.36,1.09,0.16,1.06,0.18,3.09,0.67,33.8,34.6,7.8,54,34.6,7.5,0.4,1.9,0.1,0.4,0.9,0.13,0.6,6.5,,70.2,1.46,7.7,0.16,0.27,439,478,0.09,0.78,3.29,2.51,234,3,8,0.07
"Pyle and Gal, 2012, NWT OR 2012 008",outcrop,Dodo Canyon East,,96E,65.007744,-127.324858,Canol,Canol,rock pulp,78 to 81,11DCE-027,,80.08,5.68,1.79,0.37,0.28,0.07,1.16,0.28,0.04,<0.01,0.008,64,5,10,99.73,1654,,2,4.4,2.3,6.5,1.6,5.1,50.5,<1,120,0.3,3.7,9.7,371,0.5,50.6,11.5,17.5,33,4.23,16,2.58,0.43,1.74,0.23,1.42,0.29,1.1,0.16,0.99,0.17,4.96,1.54,38.1,38.3,10.1,23,46.1,10.8,0.2,1.6,0.2,0.4,<0.5,0.26,0.6,6.6,,70,2.45,12.27,0.17,0.22,439,478,0.04,1.23,5.18,3.95,237,1,4,0.11
"Pyle and Gal, 2012, NWT OR 2012 008",outcrop,Dodo Canyon East,,96E,65.007744,-127.324858,Canol,Canol,rock pulp,81 to 84,11DCE-028,,81.64,4.88,1.69,0.3,0.05,0.07,0.92,0.2,0.02,<0.01,0.009,72,4,10,99.76,1614,,<1,4.9,2.3,5.5,1,3.5,41.6,<1,82.8,0.2,3.5,13.1,234,0.7,39.5,11.5,16.6,27.1,4.14,15.7,2.43,0.44,1.63,0.22,1.15,0.28,0.94,0.15,1.09,0.18,5.45,1.42,51.4,41.7,7.5,35,55.5,12.2,0.4,1.3,0.2,0.3,<0.5,0.21,0.5,8.4,,70.6,2.04,12.67,0.14,0.25,442,481,0.07,1.24,5.69,4.45,223,1,4,0.09
"Pyle and Gal, 2012, NWT OR 2012 008",outcrop,Dodo Canyon East,,96E,65.007744,-127.324858,Canol,Canol,rock pulp,84 to 87,11DCE-029,,84.6,3.85,1.22,0.22,0.02,0.07,0.65,0.17,0.02,<0.01,0.006,66,3,9,99.8,1379,,<1,3.6,1.6,5.1,0.6,2.5,28.9,<1,77.9,0.3,2.5,10.3,220,<0.5,30.4,7.5,11.5,20,2.88,10.8,1.87,0.34,1.28,0.16,0.92,0.18,0.52,0.1,0.85,0.11,5.17,0.97,52.8,42.6,6.7,38,47.2,9.6,0.4,1,0.1,0.2,<0.5,0.15,0.4,6.8,,70.1,1.78,12.6,0.12,0.3,441,480,0.03,1.21,5.3,4.09,238,1,6,0.08
"Pyle and Gal, 2012, NWT OR 2012 008",outcrop,Dodo Canyon East,,96E,65.007744,-127.324858,Canol,Canol,rock pulp,87 to 90,11DCE-030,,85.03,4.15,1.04,0.25,0.03,0.07,0.76,0.18,0.04,<0.01,0.008,72,4,8.1,99.73,1716,,1,2.7,2.1,4.4,1.1,3.6,34.8,<1,99.5,0.2,2.9,9.9,378,0.6,33.4,9.4,14.5,23.7,3.33,13.3,2.16,0.51,1.51,0.17,1.11,0.23,0.75,0.13,0.88,0.14,4.57,0.89,47.1,33.5,7,37,51.9,10.9,0.3,1.9,0.1,0.3,<0.5,0.14,0.5,6.4,,70.9,1.56,10.95,0.12,0.27,442,481,0.07,1.06,4.77,3.71,230,1,6,0.08
"Pyle and Gal, 2012, NWT OR 2012 008",outcrop,Dodo Canyon East,,96E,65.007744,-127.324858,Canol,Canol,rock pulp,90 to 93,11DCE-031,,82.3,4.93,1.86,0.33,0.02,0.09,0.88,0.19,0.03,<0.01,0.007,100,5,9.1,99.72,1828,,<1,7.7,2.5,6,1,3.1,42.5,<1,91.2,0.2,3.5,11.9,338,<0.5,34.9,10.3,14.9,25.6,3.47,14.1,2.24,0.35,1.47,0.19,1.08,0.25,0.87,0.13,0.98,0.15,4.61,1.41,48.7,63.5,9.2,111,83.2,15.4,1.6,1.5,0.1,0.3,<0.5,0.19,0.5,6.3,,70.6,1.73,11.09,0.13,0.27,445,484,0.12,1.09,4.79,3.7,232,3,6,0.11
"Pyle and Gal, 2012, NWT OR 2012 008",outcrop,Dodo Canyon East,,96E,65.007744,-127.324858,Canol,Canol,rock pulp,93 to 96,11DCE-032,,81.17,5.71,1.41,0.41,0.06,0.1,1.02,0.22,0.03,<0.01,0.009,63,5,9.6,99.72,1793,,<1,3.3,2.8,7.2,1.1,4.3,50.7,<1,80.5,0.3,3.3,12.7,424,0.7,36.8,11.4,16.3,27.7,3.97,17.9,2.71,0.48,1.77,0.22,1.35,0.28,0.86,0.14,0.93,0.15,5.1,1.15,40.7,44.7,9.9,28,45,12.4,0.2,1.3,0.2,0.3,<0.5,0.22,0.4,6.6,,70.5,1.12,12.44,0.08,0.28,446,485,0.09,1.14,5.38,4.24,231,2,5,0.13
"Pyle and Gal, 2012, NWT OR 2012 008",outcrop,Dodo Canyon East,,96E,65.007744,-127.324858,Canol,Canol,rock pulp,96 to 100.5,11DCE-033,,80.9,6.03,0.99,0.41,0.34,0.12,1.12,0.29,0.03,<0.01,0.01,49,5,9.4,99.68,1763,,2,1.3,3.2,6.9,1.6,5.2,50,<1,105.5,0.4,4.3,12.2,599,0.9,48.5,14.7,19.1,33.1,4.43,17.2,3.11,0.59,2.34,0.31,1.79,0.41,1.32,0.18,1.14,0.2,4.76,0.87,50.4,13.5,10.1,8,24.1,14.7,<0.1,2,0.2,0.5,<0.5,0.19,0.6,10,,70.2,1.29,11.23,0.1,0.31,443,482,0.01,1.05,4.98,3.93,226,0,6,0.12
"Pyle and Gal, 2012, NWT OR 2012 008",outcrop,Dodo Canyon East,,96E,65.007744,-127.324858,Canol,Canol,rock pulp,105 to 108,11DCE-034,,67.77,13.89,1.35,0.94,1.31,0.23,2.61,0.53,0.06,<0.01,0.014,45,11,11,99.68,1812,,<1,2.5,8.3,17.1,2.3,7.2,127.6,2,189,0.6,7.5,8.7,424,1,86.3,18.1,29,52.7,6.41,24,4.31,0.89,3.37,0.47,2.78,0.6,1.77,0.29,1.82,0.29,3.07,1.15,13.7,10.4,12,21,22.6,10.3,0.1,0.4,0.2,0.4,<0.5,0.14,0.8,5.3,,70.8,0.38,7.08,0.05,0.31,443,482,0.12,0.64,3.15,2.51,225,4,10,0.16
"Pyle and Gal, 2012, NWT OR 2012 008",outcrop,Dodo Canyon East,,96E,65.007744,-127.324858,Imperial,Imperial,rock pulp,108 to 111,11DCE-035,,69.92,13.9,2.34,1.06,0.12,0.22,2.65,0.56,0.07,<0.01,0.014,73,12,8.8,99.63,1966,,<1,7.5,7.9,15.7,3.1,9,130.3,1,151.1,0.8,8.5,7.4,455,1.2,89.5,20.3,29.9,53.9,6.4,23.8,4.49,0.87,3.42,0.54,3.28,0.7,1.74,0.3,1.8,0.32,2.4,1,13.4,33.8,13.2,181,66.1,15.4,1.3,0.4,0.3,0.4,<0.5,0.14,1,7.7,,70.2,0.33,4.67,0.07,0.23,442,481,0.19,0.44,2.47,2.03,189,8,9,0.19
"Gal and Pyle, 2012, NWT OR 2012 009",well,Dodo Canyon K-03,300K036510126450,96E,65.042673,-126.7723693,Imperial,Canyon ,rock chips,1582.317073,"DODO CANYON K-03-5190			",,57.34,18.44,7.2,2.2,1.21,0.73,3.01,0.83,0.21,0.08,0.017,70,20,8.4,99.72,1158,,6,20.1,9,21.7,4,12.7,143.4,2,141.3,0.9,11.7,4.2,236,1.5,143.1,31.5,38.9,83.5,9.2,34.1,6.78,1.47,6.08,0.95,5.23,1.05,2.89,0.44,3.02,0.48,1.42,0.88,2.3,54.2,23.7,180,64,16.9,0.3,0.1,0.3,0.1,1.8,0.11,0.3,0.9,,70.5,0.13,0.39,0.24,0.18,453,492,0.14,0.06,0.64,0.58,61,22,28,0.2
"Gal and Pyle, 2012, NWT OR 2012 009",well,Dodo Canyon K-03,300K036510126450,96E,65.042673,-126.7723693,Imperial,Loon Creek,rock chips,1585.365854,"DODO CANYON K-03-5200			",,57.74,19.02,6.7,2.13,0.66,0.7,3.03,0.84,0.16,0.06,0.016,74,20,8.7,99.71,1419,,3,19.5,9.2,21.7,3.5,13,144.4,3,135.5,0.8,11.9,3.8,245,1.7,137,29.3,38.6,77.2,8.71,33.9,6.21,1.33,5.17,0.8,4.83,0.97,2.97,0.41,2.73,0.45,1.06,0.88,1.3,48.4,25,199,67.1,13.5,0.4,<0.1,0.3,<0.1,1.5,0.14,0.3,1.1,,70.4,0.23,0.66,0.26,0.23,433,472,0.17,0.09,0.86,0.77,77,20,27,0.2
"Gal and Pyle, 2012, NWT OR 2012 009",well,Dodo Canyon K-03,300K036510126450,96E,65.042673,-126.7723693,Imperial,Loon Creek,rock chips,1588.414634,"DODO CANYON K-03-5210			",,61.13,15.9,6.29,1.97,1.06,0.7,2.72,0.76,0.17,0.05,0.016,82,17,8.9,99.67,1642,,2,20.2,8,18.2,4.2,11.8,125.1,2,141.1,0.8,10.1,5.5,283,1.4,134.6,27,36.4,72.4,8.22,33.2,5.61,1.29,5.26,0.75,4.95,0.96,2.84,0.4,2.59,0.42,1.91,1.42,7.7,66.6,21.6,229,80.3,20.8,1.9,0.5,0.3,0.2,3.3,0.23,0.7,2.9,,70.1,0.38,1.09,0.26,0.2,452,491,0.15,0.14,1.21,1.07,90,12,17,0.4
"Gal and Pyle, 2012, NWT OR 2012 009",well,Dodo Canyon K-03,300K036510126450,96E,65.042673,-126.7723693,Imperial,Loon Creek,rock chips,1591.463415,"DODO CANYON K-03-5220			",,62.04,15.25,6.32,1.98,1.16,0.68,2.59,0.75,0.15,0.05,0.014,87,17,8.7,99.68,1627,,2,19.5,7.7,18,4,11,119.4,2,145.8,0.7,10.8,5.7,295,1.2,135.9,29.3,35.4,71.9,8.08,31.6,5.88,1.14,5.1,0.78,4.96,0.94,2.76,0.39,2.8,0.39,2.07,1.49,8.7,70.7,23.4,212,83.3,22.8,1.9,0.7,0.3,0.3,2.4,0.21,0.8,3.4,,70.5,0.38,1.04,0.26,0.25,456,495,0.16,0.14,1.21,1.07,86,13,21,1.4
"Gal and Pyle, 2012, NWT OR 2012 009",well,Dodo Canyon K-03,300K036510126450,96E,65.042673,-126.7723693,Imperial,Loon Creek,rock chips,1594.512195,"DODO CANYON K-03-5230			",,62.33,14.27,6.26,1.91,1.7,0.71,2.51,0.73,0.14,0.06,0.014,84,16,9,99.66,1954,,2,17.4,6.7,16.2,3.5,11.2,112.9,2,145.9,0.8,10,5.7,279,1.2,128,24.8,32.3,63.4,7.32,30.2,5.17,1.08,4.7,0.68,3.99,0.81,2.34,0.36,2.42,0.37,2.38,1.64,11,74.4,30.5,227,85.2,22.2,2.2,0.8,0.3,0.3,1.8,0.26,1,3.5,,69.8,0.75,1.59,0.32,0.24,458,497,0.16,0.21,1.58,1.37,101,10,15,0.7
"Gal and Pyle, 2012, NWT OR 2012 009",well,Dodo Canyon K-03,300K036510126450,96E,65.042673,-126.7723693,Imperial,Loon Creek,rock chips,1597.560976,"DODO CANYON K-03-5240			",,62.48,14.27,6.4,1.94,1.27,0.71,2.53,0.72,0.14,0.05,0.014,94,16,9.1,99.65,1761,,2,18.7,6.9,17,3.5,10.3,114.7,3,153.1,0.8,10.2,6.1,291,1.4,136.1,26.8,33.2,65,7.5,28.5,5.28,1.03,4.71,0.7,4.31,0.86,2.64,0.41,2.6,0.38,2.39,1.79,11.2,72,25,206,87.2,22.3,2,0.8,0.3,0.3,2.2,0.23,0.9,3.4,,70.8,0.68,1.25,0.35,0.3,453,492,0.2,0.18,1.51,1.33,83,13,20,0.6
"Gal and Pyle, 2012, NWT OR 2012 009",well,Dodo Canyon K-03,300K036510126450,96E,65.042673,-126.7723693,Imperial,Loon Creek,rock chips,1600.609756,"DODO CANYON K-03-5250			",,63.04,13.57,6.48,1.89,1.32,0.63,2.47,0.66,0.15,0.05,0.013,97,16,9.4,99.67,1684,,4,19.7,7.4,15.3,3.3,10.4,110.9,2,152,0.6,9.6,6.3,334,1.1,114.4,25.8,31.2,61.6,7.34,27.5,5.74,1.13,4.74,0.75,4.38,0.84,2.37,0.37,2.39,0.36,2.59,1.96,12.2,67.6,22.8,222,91.8,22.2,2.4,1,0.3,0.3,2.1,0.26,1,4.5,,70.2,0.99,1.83,0.35,0.27,443,482,0.19,0.25,2,1.75,92,10,14,0.5
"Gal and Pyle, 2012, NWT OR 2012 009",well,Dodo Canyon K-03,300K036510126450,96E,65.042673,-126.7723693,Imperial,Loon Creek,rock chips,1603.658537,"DODO CANYON K-03-5260			",,64.28,13.67,5.8,1.83,1.04,0.64,2.51,0.67,0.13,0.04,0.013,99,15,9,99.67,1704,,2,19.2,7.1,16,3,9.8,114.1,2,146.5,0.7,9.6,6.8,342,1.1,116,25.4,30.1,60.8,7.24,25.6,5.14,1.05,4.52,0.66,4.05,0.81,2.27,0.38,2.35,0.39,2.53,1.96,13.7,75.6,23.1,243,107.9,23.8,2.6,0.8,0.3,0.3,1.8,0.27,1.1,6,,70,0.86,1.93,0.31,0.24,458,497,0.27,0.26,1.7,1.44,114,16,14,0.7
"Gal and Pyle, 2012, NWT OR 2012 009",well,Dodo Canyon K-03,300K036510126450,96E,65.042673,-126.7723693,Imperial,Loon Creek,rock chips,1606.707317,"DODO CANYON K-03-5270			",,64.28,13.01,5.79,1.86,1.35,0.58,2.38,0.63,0.13,0.05,0.013,108,14,9.6,99.68,1624,,2,18.4,6.7,15.4,3.3,10.2,108.9,2,150.8,0.7,8.8,8.4,339,0.9,114.6,26.6,31.5,59.3,7.01,25.6,5.23,0.98,4.64,0.68,4.16,0.76,2.23,0.37,2.3,0.36,2.9,1.88,19,73.9,21.7,244,110.2,22.5,2.6,0.8,0.3,0.3,2.1,0.28,1,5.2,,71.1,1.12,2.49,0.31,0.26,450,489,0.19,0.32,2.1,1.78,119,9,12,0.7
"Gal and Pyle, 2012, NWT OR 2012 009",well,Dodo Canyon K-03,300K036510126450,96E,65.042673,-126.7723693,Imperial,Loon Creek,rock chips,1609.756098,"DODO CANYON K-03-5280			",,64.52,12.98,5.63,1.91,1.43,0.58,2.38,0.63,0.13,0.04,0.012,111,14,9.4,99.69,1604,,2,17.9,6.6,14.9,3.2,9.3,107.5,2,147.7,0.5,9,8.6,339,1,109,24.9,29.8,58.5,6.93,26.1,5.08,0.99,4.62,0.65,4.19,0.78,2.43,0.36,2.09,0.33,2.92,1.9,18.6,77.6,22.4,232,115,24.6,2.2,0.6,0.3,0.3,2.1,0.3,1,5.2,,70.6,1.04,2.3,0.31,0.26,450,489,0.21,0.3,2.07,1.77,111,10,13,0.5
"Gal and Pyle, 2012, NWT OR 2012 009",well,Dodo Canyon K-03,300K036510126450,96E,65.042673,-126.7723693,Imperial,Loon Creek,rock chips,1612.804878,"DODO CANYON K-03-5290			",,64.14,13.32,5.68,1.85,1.39,0.59,2.4,0.66,0.21,0.04,0.013,104,14,9.4,99.69,1628,,<1,17,7.1,16.6,3.4,10.3,111.9,<1,149.1,0.6,8.8,7.7,333,1.9,119.1,24.9,30.4,55.2,6.85,27.2,5.04,1.1,4.46,0.74,4.22,0.9,2.42,0.4,2.39,0.38,2.67,1.97,16.6,73.7,24.3,248,109.5,23.5,2.5,0.8,0.3,0.3,2,0.29,1,4.8,,70.1,1.17,2.53,0.32,0.25,443,482,0.21,0.33,2.24,1.91,113,9,11,0.5
"Gal and Pyle, 2012, NWT OR 2012 009",well,Dodo Canyon K-03,300K036510126450,96E,65.042673,-126.7723693,Imperial,Loon Creek,rock chips,1615.853659,"DODO CANYON K-03-5300			",,62.17,14.37,6.26,1.95,1.41,0.59,2.51,0.68,0.15,0.05,0.014,98,16,9.4,99.61,1658,,3,18.6,7.3,16.1,3.2,9.6,110.8,3,149.3,0.8,9.9,7,338,1.1,121.1,26.1,34.5,61,7.66,28.3,5.56,1.12,4.81,0.74,4.55,0.86,2.7,0.37,2.44,0.39,2.53,1.59,13.4,67.7,21.3,220,92.6,22.6,1.8,0.6,0.3,0.3,1.9,0.23,0.9,4.1,,70.3,0.63,1.49,0.3,0.21,457,496,0.17,0.19,1.49,1.3,100,11,14,0.3
"Gal and Pyle, 2012, NWT OR 2012 009",well,Dodo Canyon K-03,300K036510126450,96E,65.042673,-126.7723693,Imperial,Mirror Lake,rock chips,1618.902439,"DODO CANYON K-03-5310			",,62.08,14.48,6.41,1.97,1.45,0.61,2.56,0.68,0.16,0.05,0.014,91,16,9.2,99.7,1595,,<1,18.1,7.8,16.9,3.5,11.7,115.1,2,149.5,0.7,9.5,7,319,1.2,118.2,25.5,33.6,65.4,7.72,30.8,5.43,1.12,4.76,0.71,4.25,0.87,2.58,0.36,2.36,0.36,2.47,1.73,12.6,63.1,19.5,213,86,19.5,1.6,0.5,0.3,0.3,2.1,0.23,0.7,3.7,,70.5,0.85,1.87,0.31,0.24,449,488,0.19,0.24,1.75,1.51,107,11,14,0.8
"Gal and Pyle, 2012, NWT OR 2012 009",well,Dodo Canyon K-03,300K036510126450,96E,65.042673,-126.7723693,Imperial,Mirror Lake,rock chips,1621.95122,"DODO CANYON K-03-5320			",,62.48,13.9,6.12,2.01,1.79,0.58,2.46,0.66,0.15,0.05,0.014,97,15,9.4,99.67,1727,,<1,18.4,6.7,16,3.3,9.8,108.7,2,157.8,0.7,9.6,7.5,328,1.3,117.6,27.5,33.6,63,7.4,26.6,5.27,1.11,4.86,0.7,4.32,0.83,2.45,0.35,2.5,0.36,2.73,1.7,14.8,67.7,20.6,228,92.4,21.7,1.9,0.8,0.3,0.3,1.7,0.26,0.8,4.3,,70.3,0.55,1.26,0.3,0.21,452,491,0.18,0.17,1.47,1.3,86,12,14,0.4
"Gal and Pyle, 2012, NWT OR 2012 009",well,Dodo Canyon K-03,300K036510126450,96E,65.042673,-126.7723693,Imperial,Mirror Lake,rock chips,1625,"DODO CANYON K-03-5330			",,61.76,13.84,6.92,1.95,1.46,0.55,2.44,0.66,0.14,0.05,0.014,101,15,9.9,99.66,1753,,2,17.8,6.9,16.2,3.2,10,107.9,2,141.7,0.6,9.5,7.4,329,1.4,117.6,25.5,32.3,60.6,7.2,24.4,5.15,1.06,4.75,0.7,4.15,0.79,2.33,0.35,2.55,0.38,2.61,2.26,16.9,67.3,20.6,218,91.2,20.5,1.8,0.8,0.3,0.3,1.8,0.27,0.8,4.1,,70.8,0.84,1.92,0.31,0.22,461,500,0.19,0.25,1.79,1.54,107,11,12,0.5
"Gal and Pyle, 2012, NWT OR 2012 009",well,Dodo Canyon K-03,300K036510126450,96E,65.042673,-126.7723693,Imperial,Mirror Lake,rock chips,1628.04878,"DODO CANYON K-03-5340			",,62.28,14.57,5.98,1.94,1.31,0.6,2.66,0.68,0.13,0.05,0.015,98,16,9.4,99.65,1791,,<1,17.9,7.2,18,3.5,11,121.5,3,159.4,0.9,10.4,7.2,331,1.4,117.2,25.7,33.9,63.6,7.48,29.9,5.4,1.08,4.68,0.74,4.21,0.87,2.65,0.39,2.47,0.39,2.44,1.58,12.2,60.4,18.8,226,80.4,18.7,1.6,0.9,0.3,0.3,2.9,0.22,0.6,4,,69.7,0.9,1.86,0.33,0.23,454,493,0.19,0.25,1.85,1.6,101,10,12,0.5
"Gal and Pyle, 2012, NWT OR 2012 009",well,Dodo Canyon K-03,300K036510126450,96E,65.042673,-126.7723693,Imperial,Mirror Lake,rock chips,1631.097561,"DODO CANYON K-03-5350			",,62.23,14.74,5.87,1.95,1.28,0.59,2.69,0.69,0.13,0.04,0.015,95,16,9.4,99.67,1616,,2,16.8,7.3,17.1,3.4,10.4,120.5,3,150.5,0.7,9.9,6.5,325,1.6,116.3,25.2,33.6,61,7.29,26.7,4.99,1.04,4.46,0.72,4.14,0.83,2.41,0.38,2.24,0.37,2.43,1.57,12.3,60.3,20.5,220,81.4,20.1,1.6,0.9,0.3,0.3,2.4,0.28,0.6,3.9,,70.4,0.65,1.64,0.28,0.22,457,496,0.17,0.21,1.56,1.35,105,11,14,0.5
"Gal and Pyle, 2012, NWT OR 2012 009",well,Dodo Canyon K-03,300K036510126450,96E,65.042673,-126.7723693,Imperial,Mirror Lake,rock chips,1634.146341,"DODO CANYON K-03-5360			",,61.79,14.88,6.05,1.97,1.35,0.6,2.73,0.7,0.12,0.04,0.014,94,16,9.4,99.66,1711,,4,18.4,7.7,16.6,3.5,10.6,118.6,3,158.8,0.7,10.5,6.6,327,1.2,118.3,25.5,34.6,63.6,7.52,27,5.19,1.07,4.54,0.73,3.96,0.92,2.54,0.38,2.54,0.39,2.4,1.68,11.5,57.5,18.3,201,77,18.3,1.4,0.9,0.3,0.3,1.6,0.3,0.6,3.6,,70.3,0.64,1.61,0.29,0.25,440,479,0.18,0.21,1.66,1.45,97,11,15,0.4
"Gal and Pyle, 2012, NWT OR 2012 009",well,Dodo Canyon K-03,300K036510126450,96E,65.042673,-126.7723693,Canol,Dodo Canyon,rock chips,1649.390244,"DODO CANYON K-03-5410			",,64.03,14.56,5.35,1.74,0.91,0.55,2.58,0.66,0.13,0.04,0.014,85,15,9.1,99.66,1755,,<1,17.5,7.5,17.9,3.5,10,117.7,2,159.1,0.7,10.4,7.9,339,1.8,113.9,25.5,32.8,64,7.46,28.1,5.39,1.04,4.52,0.73,3.85,0.87,2.34,0.38,2.54,0.4,2.4,1.29,17.3,52.4,16.2,198,79.1,18.1,0.9,0.8,0.3,0.2,1.2,0.16,0.6,3.6,,71.3,0.3,0.93,0.24,0.28,443,482,0.11,0.12,1.15,1.03,81,10,24,0.3
"Gal and Pyle, 2012, NWT OR 2012 009",well,Dodo Canyon K-03,300K036510126450,96E,65.042673,-126.7723693,Canol,Dodo Canyon,rock chips,1664.634146,"DODO CANYON K-03-5460			",,72.6,9.21,3.52,1.29,1.2,0.43,1.61,0.39,0.1,0.02,0.009,113,10,9.2,99.63,2246,,<1,13.3,4.9,11,1.8,6.5,76.1,2,143.6,0.4,6.4,14.4,372,0.8,69,22.1,23,41.9,5.24,21,3.77,0.79,3.49,0.55,3.21,0.71,2,0.28,1.82,0.29,4.17,1.63,37,49.2,12.8,211,88.1,16.6,1.5,1.5,0.2,0.3,0.5,0.21,0.5,4.7,,70.7,0.78,2.04,0.28,0.32,452,491,0.24,0.26,2.45,2.19,83,10,13,0.3
"Gal and Pyle, 2012, NWT OR 2012 009",well,Dodo Canyon K-03,300K036510126450,96E,65.042673,-126.7723693,Canol,Dodo Canyon,rock chips,1679.878049,"DODO CANYON K-03-5510			",,73.61,8.14,3.65,1.29,1.19,0.42,1.44,0.36,0.09,0.03,0.009,102,9,9.3,99.57,2778,,2,11.9,4.2,10,2,6.5,65.7,2,162.5,0.4,5.9,14.8,338,1.2,68.5,22.2,22.8,39.3,5.11,20.2,3.6,0.78,3.54,0.53,3.15,0.63,1.79,0.29,1.93,0.29,4.25,1.67,41.8,50.9,12.8,199,88.7,20,1.3,1.5,0.2,0.3,0.9,0.31,0.4,5,,70.7,1.04,2.16,0.32,0.27,463,502,0.19,0.29,2.67,2.38,81,7,10,0.2
"Gal and Pyle, 2012, NWT OR 2012 009",well,Dodo Canyon K-03,300K036510126450,96E,65.042673,-126.7723693,Canol,Vermillion Creek,rock chips,1695.121951,"DODO CANYON K-03-5560			",,79.21,6.05,2.48,0.62,0.54,0.42,1.16,0.29,0.08,0.01,0.007,104,6,8.7,99.57,2904,,<1,10.4,2.6,7.6,1.6,5.7,50.2,<1,127.3,0.4,4.5,16.6,378,0.7,55,22.4,20.3,33,4.54,17.1,3.22,0.74,3.27,0.51,2.86,0.6,1.78,0.25,1.61,0.24,4.72,1.55,50.7,53.3,10.8,208,86.3,14.6,1.6,1.9,0.2,0.3,0.5,0.18,0.3,6.2,,70.4,2.18,4.68,0.32,0.26,459,498,0.21,0.59,4.9,4.31,96,4,5,0.2
"Gal and Pyle, 2012, NWT OR 2012 009",well,Dodo Canyon K-03,300K036510126450,96E,65.042673,-126.7723693,Canol,Vermillion Creek,rock chips,1710.365854,"DODO CANYON K-03-5610			",,65.47,11.25,5.17,1.5,2.22,0.64,2.11,0.55,0.13,0.04,0.012,100,12,10.3,99.44,3477,,2,26,4.9,13.5,3,8.4,94.8,1,209.6,0.7,7.6,13.7,218,0.9,104.8,24.5,29,58.7,6.74,25.8,4.89,0.95,4.55,0.63,3.92,0.67,2.42,0.33,2.21,0.31,4.37,2.13,30.3,69.8,19.5,191,84.5,19.3,1.7,1.2,0.3,0.4,0.7,0.33,0.3,5.2,,70.3,1.1,2.61,0.3,0.29,446,485,0.22,0.33,2.72,2.39,96,8,11,0.5
"Gal and Pyle, 2012, NWT OR 2012 009",well,Dodo Canyon K-03,300K036510126450,96E,65.042673,-126.7723693,Canol,Vermillion Creek,rock chips,1725.609756,"DODO CANYON K-03-5660			",,71.18,6.65,3.12,0.97,3.36,0.53,1.29,0.33,0.1,0.02,0.007,110,8,11.8,99.39,4502,,<1,19.1,2.8,8.4,1.9,6.4,52.2,1,250.1,0.4,5.1,19,190,0.9,64.7,23.1,21.4,39.6,5.11,20.4,3.88,0.8,3.81,0.56,3.06,0.67,1.86,0.29,1.99,0.28,6.56,2,43.3,62.9,15.2,140,81.2,15.2,2.2,1.6,0.3,0.3,<0.5,0.23,0.2,5.1,,70.3,2.64,5.95,0.31,0.3,459,498,0.23,0.74,5.78,5.04,103,4,5,1
"Gal and Pyle, 2012, NWT OR 2012 009",well,Dodo Canyon K-03,300K036510126450,96E,65.042673,-126.7723693,Hare Indian,Prohibition Creek,rock chips,1740.853659,"DODO CANYON K-03-5710			",,70.97,6.85,3.23,1.1,3.26,0.52,1.31,0.34,0.09,0.02,0.006,111,8,11.7,99.41,4284,,<1,17.8,2.9,8.7,1.8,6.5,51.6,1,252.5,0.5,5.6,18.6,186,1,65.2,23.1,22.9,39.5,5.17,21.1,3.85,0.82,3.65,0.58,3.28,0.66,1.77,0.29,1.8,0.27,6.17,1.83,41.8,62.5,15.2,143,81.2,15.5,1.9,1.7,0.3,0.3,0.7,0.22,0.4,5.2,,69.9,2.64,5.81,0.31,0.29,455,494,0.24,0.73,5.62,4.89,103,4,5,0.5
"Gal and Pyle, 2012, NWT OR 2012 009",well,Dodo Canyon K-03,300K036510126450,96E,65.042673,-126.7723693,Hare Indian,Bluefish,rock chips,1756.097561,"DODO CANYON K-03-5760			",,67.02,10.3,3.44,1.49,3.23,0.37,1.84,0.43,0.09,0.02,0.012,142,11,11.4,99.66,1672,,2,11,5.8,12.1,2.1,6.7,91.8,2,258.5,0.5,6.5,13.7,354,1,68.1,26.6,26.5,44.2,5.77,22.6,4.26,0.87,4.03,0.62,3.63,0.73,2.11,0.33,2.05,0.32,5.06,1.67,58.2,44.7,11.4,252,114,15.4,1.9,1.3,0.2,0.3,0.7,0.18,0.5,6,,70,1.19,2.87,0.29,0.23,464,503,0.15,0.35,3.17,2.82,91,5,7,0.7
"Gal and Pyle, 2012, NWT OR 2012 009",well,Dodo Canyon K-03,300K036510126450,96E,65.042673,-126.7723693,Hare Indian,Bluefish,rock chips,1759.146341,"DODO CANYON K-03-5770			",,66.1,10.77,3.63,1.55,3.14,0.38,1.91,0.45,0.09,0.03,0.011,140,11,11.6,99.66,1677,,<1,12.3,6.4,12.9,2,7.4,94.5,2,259.6,0.4,6.6,13.7,361,1.1,72.1,27.9,27,44.7,5.88,24.9,4.1,0.91,4.11,0.62,3.85,0.76,2.19,0.32,2.02,0.34,4.92,1.66,60.7,47.7,12.4,253,122,16.5,1.9,1.1,0.2,0.3,<0.5,0.18,0.5,6.6,,70.4,1.2,2.61,0.32,0.22,463,502,0.15,0.33,2.72,2.39,96,6,8,1.1
"Gal and Pyle, 2012, NWT OR 2012 009",well,Dodo Canyon K-03,300K036510126450,96E,65.042673,-126.7723693,Hare Indian,Bluefish,rock chips,1762.195122,"DODO CANYON K-03-5780			",,67.77,9.53,4.27,1.29,2.81,0.53,1.76,0.45,0.1,0.03,0.009,116,10,11,99.55,2848,,<1,20.1,4.2,11.7,2.1,7.7,76.7,2,233.1,0.5,6.8,14.7,265,1.1,82.6,26.1,25.9,46.8,5.74,21.5,4.27,0.87,4.07,0.63,3.77,0.76,1.93,0.33,1.94,0.32,5.08,2.01,42.4,61.4,16.5,190,95.5,19.2,1.9,1.4,0.3,0.4,1.5,0.26,0.4,5.8,,70.2,2.14,4.57,0.32,0.24,462,501,0.19,0.58,4.34,3.76,105,4,6,0.6
"Gal and Pyle, 2012, NWT OR 2012 009",well,Dodo Canyon K-03,300K036510126450,96E,65.042673,-126.7723693,Hare Indian,Bluefish,rock chips,1765.243902,"DODO CANYON K-03-5790			",,57.82,13.83,5.46,2.28,3.85,0.39,2.4,0.58,0.1,0.03,0.014,145,14,12.9,99.63,1581,,3,15.2,8,16.2,2.7,10.7,122.9,3,265.2,0.6,9.1,12.7,360,1,94.5,29.2,33.5,57.3,7.07,27.1,5.06,1,4.46,0.68,3.75,0.82,2.42,0.35,2.37,0.37,4.83,2.51,48,46.2,15.2,323,122,22,3.1,1.3,0.3,0.4,1.2,0.18,0.6,7.4,,70.1,1.22,3.24,0.27,0.24,462,501,0.18,0.39,3.37,2.98,96,5,7,0.8
"Gal and Pyle, 2012, NWT OR 2012 009",well,Dodo Canyon K-03,300K036510126450,96E,65.042673,-126.7723693,Hare Indian,Bluefish,rock chips,1768.292683,"DODO CANYON K-03-5800			",,57.07,13.42,5.82,2.24,4.25,0.34,2.35,0.55,0.1,0.06,0.014,170,13,13.4,99.65,1383,,<1,14.4,8,16.4,2.5,9.6,123.1,3,263.9,0.7,8.5,12.8,329,1,88.1,27.2,32.8,55,6.98,26.6,5.02,0.99,4.46,0.69,3.67,0.85,2.14,0.36,2.05,0.35,4.88,2.62,55.8,47.6,16,304,151.2,26.3,3.4,1.9,0.2,0.4,0.5,0.25,0.8,9,,70.6,1.47,4.15,0.26,0.23,462,501,0.17,0.48,3.82,3.34,109,4,6,1.1
"Gal and Pyle, 2012, NWT OR 2012 009",well,Dodo Canyon K-03,300K036510126450,96E,65.042673,-126.7723693,Hume,Hume,rock chips,1771.341463,"DODO CANYON K-03-5810			",,59.48,13.02,4.84,1.96,4.58,0.38,2.28,0.57,0.11,0.03,0.014,166,13,12.4,99.66,1321,,<1,15.1,7.5,16,2.5,9.6,115.1,3,268.6,0.7,8.5,13.7,359,1.1,99.1,28.2,32.6,55.6,7.02,25.6,4.87,0.98,4.36,0.68,3.76,0.87,2.36,0.37,2.34,0.35,4.75,2.01,54.4,51.8,15.5,317,146.7,21.7,5.1,1.6,0.2,0.3,1,0.25,0.5,9.1,,70.5,1.18,3.26,0.27,0.25,462,501,0.19,0.39,3.52,3.13,93,5,7,1
"Pyle and Gal, 2013, NWT_OR_2013_05",outcrop,Gayna Gorge,,106H,65.290876,-129.3571163,Hare Indian,Bluefish,rock chips,0-1.0,12-GG-1,,32.45,5.44,1.79,1,28.31,0.21,1.15,0.28,0.17,0.02,0.009,154,7,28.8,99.67,228,,1,4.9,3.2,7.9,1.5,4.7,51.8,2,868.7,0.3,3.7,9.6,494,0.6,59.4,25.1,27.6,33.9,5.97,23.1,3.61,0.81,3.6,0.48,2.98,0.64,1.76,0.25,1.62,0.26,11.01,0.58,26,45.5,6.4,269,120.3,6.5,12.1,1.5,0.1,0.2,<0.5,0.08,0.2,10.9,,70.1,0.57,2.82,0.17,0.98,458,498,0.51,0.34,4.39,4.05,64,12,22,
"Pyle and Gal, 2013, NWT_OR_2013_05",outcrop,Gayna Gorge,,106H,65.290876,-129.3571163,Hare Indian,Bluefish,rock chips,1.0-2.0,12-GG-2,,70.26,7.23,1.69,0.75,3.91,0.19,1.41,0.35,0.09,<0.01,0.016,210,8,13.8,99.78,320,,<1,6,4,8.9,1.7,6.1,66,2,196,0.5,4.8,11.5,456,0.9,75.6,29.5,27.8,34.4,5.63,23.3,4.13,0.84,4.04,0.57,3.56,0.69,2.23,0.32,1.76,0.32,7.88,0.67,33.5,56.9,7.5,324,157.1,7.7,14,2.2,0.1,0.3,<0.5,0.12,0.1,14.6,,50.6,0.95,5.02,0.16,1.29,456,496,0.81,0.58,7.02,6.44,72,12,18,
"Pyle and Gal, 2013, NWT_OR_2013_05",outcrop,Gayna Gorge,,106H,65.290876,-129.3571163,Hare Indian,Bluefish,rock chips,2.0-3.0,12-GG-3,,69.52,7.71,2.16,1.09,3.48,0.21,1.5,0.35,0.09,0.01,0.015,194,8,13.6,99.76,341,,1,4.9,4.4,9.7,1.4,6.6,75.3,<1,180.5,0.4,4.4,11.3,568,0.7,75,22.5,23.3,31.1,5.06,20.4,3.26,0.68,3.35,0.45,2.83,0.61,1.9,0.28,1.78,0.25,7.2,0.67,52.4,58.6,11,336,153.3,10.7,14.6,2.7,0.2,0.4,0.5,0.14,0.2,18.6,,50.4,0.83,4.34,0.16,1.13,458,498,0.71,0.5,6.35,5.85,68,11,18,
"Pyle and Gal, 2013, NWT_OR_2013_05",outcrop,Gayna Gorge,,106H,65.290876,-129.3571163,Hare Indian,Bluefish,rock chips,3.0-4.0,12-GG-4,,61.62,9.05,3.12,1.09,4.58,0.34,1.86,0.45,0.11,0.01,0.018,194,9,17.5,99.72,333,,6,3.5,5.9,11.1,2.2,7.9,90.6,1,207,0.6,5.1,17.5,772,1,102.8,26,30.3,39,6.53,26.1,3.93,0.82,3.93,0.53,3.47,0.76,2.2,0.3,2.22,0.34,9.21,1.44,62.5,63.1,11.9,266,127,17.7,12.5,4.6,0.2,0.5,<0.5,0.16,0.1,17,,50.4,1.39,5.81,0.19,1.04,462,502,0.81,0.67,8.44,7.77,69,10,12,
"Pyle and Gal, 2013, NWT_OR_2013_05",outcrop,Gayna Gorge,,106H,65.290876,-129.3571163,Hare Indian,Bluefish,rock chips,4.0-5.0,12-GG-5,,64.18,8.98,2.54,1.26,3.63,0.35,1.83,0.49,0.19,0.02,0.017,300,11,16.1,99.62,303,,4,8,4.9,11.4,2.6,8.3,87.8,2,189.3,0.6,5.9,26.5,1011,0.7,113.4,42,34.2,43.9,7.71,32.3,5.84,1.34,6.18,0.88,4.66,1.16,3.06,0.44,3,0.44,8.99,1.01,102.1,95.6,12.4,638,219.8,20.7,24.5,7.4,0.2,0.5,<0.5,0.19,0.3,21.4,,50.3,1.25,6.49,0.16,1.22,457,497,0.84,0.72,8.22,7.5,79,10,15,
"Pyle and Gal, 2012, NWT OR 2012 008",outcrop,Graffe River,,96E,65.032138,-127.5168148,canol,canol,rock pulp,0 to 3,11GR-001,,77.21,3.45,1.14,0.59,4.94,0.06,0.62,0.14,0.09,<0.01,0.008,106,4,11.5,99.76,1394,,<1,2.8,1.5,3.8,0.6,2.2,26.3,<1,302.2,0.2,1.9,11.8,212,0.6,26.1,25,14.4,17.9,2.97,12.6,2.36,0.56,2.45,0.4,2.58,0.55,1.67,0.21,1.69,0.21,6.38,0.74,44.1,31.1,4.2,112,70.2,5.8,2.7,1,<0.1,0.2,<0.5,0.09,0.3,2.4,,70.3,2.43,13.81,0.15,0.24,443,483,0.01,1.36,5.24,3.88,264,0,5,1.1
"Pyle and Gal, 2012, NWT OR 2012 008",outcrop,Graffe River,,96E,65.032138,-127.5168148,canol,canol,rock pulp,3 to 6,11GR-002,,73.23,4.13,1.13,0.42,7.08,0.06,0.74,0.15,0.08,<0.01,0.01,98,4,12.7,99.74,1443,,4,3.2,2.2,4.9,0.9,2.5,35,1,376.3,0.2,2.3,9.7,244,<0.5,27.3,21,14.8,18.8,3.2,12.7,2.3,0.51,2.58,0.4,2.24,0.53,1.42,0.23,1.39,0.18,6.48,0.72,31.9,32.1,4.8,118,63.9,6.6,3,1,<0.1,0.2,<0.5,0.09,0.3,3,,70.6,2.29,12.37,0.16,0.22,445,485,0.1,1.24,4.98,3.74,248,2,4,1.5
"Pyle and Gal, 2012, NWT OR 2012 008",outcrop,Graffe River,,96E,65.032138,-127.5168148,canol,canol,rock pulp,6 to 9,11GR-003,,76.26,5.64,1.64,0.84,2.49,0.07,1.02,0.23,0.11,<0.01,0.01,121,5,11.4,99.7,1523,,8,5.8,2.8,7,1.2,3.9,47.2,<1,213.2,0.3,3,14.8,300,0.7,42.4,26.6,19.8,28.7,4.62,17.4,3.61,0.77,3.65,0.53,3.13,0.71,2.02,0.29,1.7,0.26,6.28,1.15,44.1,47.7,7.7,249,83.1,8.7,3.2,1.3,<0.1,0.3,<0.5,0.12,0.2,4.6,,70.7,2.59,13.73,0.16,0.16,446,486,0.08,1.37,5.67,4.3,242,1,3,0.7
"Pyle and Gal, 2012, NWT OR 2012 008",outcrop,Graffe River,,96E,65.032138,-127.5168148,canol,canol,rock pulp,9 to 12,11GR-004,,74.1,7.17,2.5,0.77,1.53,0.08,1.31,0.31,0.09,<0.01,0.014,199,7,11.7,99.62,1789,,3,10.8,3.3,8.1,1.4,5.4,61.6,1,177,0.5,4.2,15.2,526,0.9,52.5,21.3,21.4,32.3,4.81,18.3,3.17,0.63,3.08,0.46,2.96,0.57,1.61,0.28,1.75,0.27,6.47,1.86,80.3,83.1,15.8,362,169.1,13.4,5.1,2.6,0.1,0.7,<0.5,0.23,0.6,8.9,,70,3.39,15.06,0.18,0.11,447,487,0.05,1.54,6.05,4.51,249,1,2,0.4
"Pyle and Gal, 2012, NWT OR 2012 008",outcrop,Graffe River,,96E,65.032138,-127.5168148,canol,canol,rock pulp,12 to 15,11GR-005,,79.57,4.91,1.58,0.52,1.61,0.07,0.86,0.2,0.09,<0.01,0.009,116,5,10.3,99.7,1656,,4,6.3,2.3,6.3,1.3,3.9,39.3,1,189,0.2,3.2,15.3,265,0.6,39,20.9,16.5,25.4,3.88,15.5,2.89,0.64,3.03,0.46,2.65,0.58,1.52,0.24,1.34,0.17,5.82,1.13,50.2,56.5,10.2,185,96.8,10.5,3.2,2,<0.1,0.4,<0.5,0.16,0.3,5.7,,70,2.99,14.09,0.18,0.14,442,482,0.08,1.43,5.49,4.06,257,1,3,0.4
"Pyle and Gal, 2012, NWT OR 2012 008",outcrop,Graffe River,,96E,65.032138,-127.5168148,canol,canol,rock pulp,15 to 18,11GR-006,,71.14,5.07,1.62,0.74,7.14,0.06,0.9,0.22,0.1,0.01,0.01,113,5,12.6,99.64,1838,,2,7.5,2.3,6.6,1.1,4,42.8,<1,564.3,0.2,3.1,11,334,0.8,46.3,24,17.7,26.5,3.89,15.1,3.23,0.58,2.92,0.45,2.47,0.57,1.7,0.24,1.56,0.24,5.72,1.2,30.6,47,8.5,175,85.4,8.3,3,1.4,<0.1,0.3,<0.5,0.11,0.3,5,,70.7,2.11,9.86,0.18,0.19,447,487,0.15,1.01,4.09,3.08,241,4,5,1.6
"Pyle and Gal, 2012, NWT OR 2012 008",outcrop,Graffe River,,96E,65.032138,-127.5168148,canol,canol,rock pulp,18 to 21,11GR-007,,72.16,6.66,2.46,0.85,2.55,0.08,1.44,0.34,0.12,0.01,0.01,132,7,12.9,99.64,1921,,5,12.1,3.1,8.7,2.2,7.3,61.3,<1,266.7,0.5,4.8,19.9,268,0.8,73.3,30.5,25.5,43.7,5.92,25.1,4.56,1.08,4.54,0.72,3.95,0.84,2.34,0.36,2.04,0.28,7.15,1.84,58.3,75.2,16.8,142,106.2,13.9,2,1.5,0.2,0.4,<0.5,0.22,0.3,5.2,,70.4,2.67,14.4,0.16,0.16,450,490,0.12,1.43,6.43,5,224,2,2,0.7
"Pyle and Gal, 2012, NWT OR 2012 008",outcrop,Graffe River,,96E,65.032138,-127.5168148,canol,canol,rock pulp,21 to 24,11GR-008,,68.85,6.69,3.05,0.71,3.97,0.08,1.45,0.36,0.09,<0.01,0.01,111,7,14.4,99.67,1899,,2,13,2.8,8.7,2.1,5.5,59.1,1,239.5,0.4,4.9,20.9,176,1.4,68.9,22.6,22.6,39.8,5.08,20.6,4.08,0.83,4.1,0.6,3.22,0.71,2,0.31,1.89,0.26,7.68,2.21,47,81.5,15.7,151,103.9,15.1,2.4,1.3,0.3,0.4,<0.5,0.34,0.3,6,,70.5,2.17,13.72,0.14,0.35,446,486,0.23,1.34,6.78,5.44,202,3,5,0.9
"Pyle and Gal, 2012, NWT OR 2012 008",outcrop,Graffe River,,96E,65.032138,-127.5168148,canol,canol,rock pulp,24 to 27,11GR-009,,78.77,5.08,1.73,0.35,1.39,0.08,1.06,0.27,0.06,<0.01,0.008,69,5,10.8,99.66,2475,,<1,8.7,1.8,6.8,1.4,5.5,41.1,<1,157.6,0.4,3.6,12.5,161,0.9,56.1,13,18.1,30.1,4.12,15.3,2.51,0.47,2.1,0.32,2.06,0.34,1.19,0.2,1.07,0.19,5.43,1.4,45,36.8,14.3,90,53.3,8.6,0.9,1.1,0.2,0.3,<0.5,0.25,1,5.9,,70.1,1.84,10.74,0.15,0.41,440,480,0.36,1.08,5.23,4.15,205,7,8,0.3
"Pyle and Gal, 2012, NWT OR 2012 008",outcrop,Graffe River,,96E,65.032138,-127.5168148,canol,canol,rock pulp,27 to 30,11GR-010,,76.25,6.25,2.04,0.33,0.97,0.09,1.36,0.33,0.05,<0.01,0.009,56,5,12,99.67,2283,,8,5.8,2.5,8,1.9,4.9,54,1,125.2,0.4,4,10.3,212,0.8,65.2,11.6,19.2,34.6,4.57,17,2.21,0.32,1.31,0.23,1.45,0.34,1.07,0.17,1.25,0.19,5.47,1.84,36.1,30.7,16,41,38.4,10.4,0.3,1.2,0.2,0.4,<0.5,0.26,0.4,4.8,,69.7,1.9,9.59,0.17,0.39,434,474,0.39,1,5.37,4.37,179,7,7,0.1
"Pyle and Gal, 2012, NWT OR 2012 008",outcrop,Graffe River,,96E,65.032138,-127.5168148,canol,canol,rock pulp,30 to 33,11GR-011,,75.55,6.26,2.64,0.43,1.6,0.09,1.32,0.32,0.07,<0.01,0.011,116,6,11.4,99.67,2213,,2,14.8,2.6,8.2,2,5.3,52,<1,133.1,0.4,4.4,13.3,210,0.6,61.8,15.9,18.1,35.2,4.35,19.4,2.96,0.59,2.37,0.41,2.3,0.49,1.4,0.24,1.46,0.19,5.93,1.95,37.8,52.3,13.3,192,94.9,12.9,2.2,1.8,0.2,0.3,<0.5,0.24,0.6,4.1,,70.8,2.5,11.66,0.18,0.3,441,481,0.28,1.21,5.69,4.48,205,5,5,0.3
"Pyle and Gal, 2012, NWT OR 2012 008",outcrop,Graffe River,,96E,65.032138,-127.5168148,canol,canol,rock pulp,33 to 36,11GR-012,,65.49,9,4.06,1.39,3.78,0.09,1.93,0.48,0.13,0.02,0.009,85,10,13.2,99.63,2061,,2,24.1,4,11.5,2.5,7.7,79.2,2,243.8,0.5,7.3,17.7,166,1.3,106.3,24.6,28.3,52.2,6.5,26.6,4.57,0.97,4.2,0.68,3.73,0.85,2.16,0.37,2.15,0.32,5.79,2.78,38,80.9,20.8,124,67.9,18.3,2.1,1.4,0.3,0.4,<0.5,0.32,0.4,5.9,,70.3,1.56,8.86,0.15,0.26,445,485,0.15,0.88,4.96,4.08,179,3,5,1
"Pyle and Gal, 2012, NWT OR 2012 008",outcrop,Graffe River,,96E,65.032138,-127.5168148,canol,canol,rock pulp,36 to 39,11GR-013,,73.57,7,3.26,0.46,2.38,0.08,1.36,0.37,0.1,<0.01,0.009,97,7,11.1,99.73,1646,,<1,21.1,3.2,8.7,1.9,6.4,58.6,<1,154.1,0.5,5.5,13.4,157,1.1,78,18.7,21.1,42.9,5.09,21.1,3.72,0.74,3.13,0.5,2.65,0.64,1.76,0.28,1.75,0.25,4.9,2.31,34.9,63.4,19.4,157,88.8,14.8,1.7,1.3,0.3,0.4,<0.5,0.24,0.5,5.7,,70.3,1.11,7.93,0.12,0.57,436,476,0.44,0.8,4.52,3.72,175,10,13,0.5
"Gal and Pyle, 2012, NWT OR 2012 009",well,Hoosier Ridge N-22,300N226530127300,96E,65.36579,-127.5820856,Imperial,Loon Creek,rock chips,715,"HOOSIER RIDGEN-22-715			",,52.1,13.88,6.36,2.33,7.94,0.57,2.38,0.66,0.13,0.07,0.013,74,15,13.2,99.69,1262,,3,17.5,6.9,16.8,3.1,9.4,112.6,2,206.6,0.6,9.7,4.9,230,1.4,114.4,25.3,31.1,58.8,6.86,25.2,4.86,1.07,4.45,0.71,4.07,0.82,2.48,0.36,2.46,0.36,3.86,1.47,7.4,59.6,18.2,175,60.8,19.7,1.4,1,0.2,0.2,1.1,0.25,0.8,2.3,,70.7,0.36,2.13,0.15,0.23,446,485,0.16,0.22,1.34,1.12,159,12,17,0.4
"Gal and Pyle, 2012, NWT OR 2012 009",well,Hoosier Ridge N-22,300N226530127300,96E,65.36579,-127.5820856,Imperial,Mirror Lake,rock chips,725,"HOOSIER RIDGEN-22-725			",,57.22,12.14,5.4,1.81,7.24,0.55,2.21,0.59,0.12,0.05,0.011,96,13,12.4,99.69,1255,,5,18.8,6.4,15,3.2,8.5,103.2,2,223.2,0.7,9.4,7.3,341,1.1,109,26.4,30.5,56.4,6.82,23.8,4.82,1.04,4.42,0.69,3.61,0.84,2.44,0.36,2.33,0.34,3.67,1.62,13,58,18.7,184,79.4,17.5,2.3,1.3,0.2,0.3,1.9,0.23,1.2,3.3,,70,0.54,3.18,0.15,0.25,444,483,0.18,0.33,1.55,1.22,205,12,16,0.5
"Gal and Pyle, 2012, NWT OR 2012 009",well,Hoosier Ridge N-22,300N226530127300,96E,65.36579,-127.5820856,Ramparts,Kee Scarp,rock chips,735,"HOOSIER RIDGEN-22-735			",,61.51,11.1,4.8,2.25,3.85,0.42,2.23,0.49,0.1,0.03,0.011,154,11,12.8,99.66,1212,,2,18.1,6.6,14.4,2.9,7.4,110.5,1,183.6,0.5,7.6,16.2,514,1.6,94.7,27.3,28.2,50.7,6.3,24.1,4.62,0.99,4.5,0.66,3.61,0.71,2.24,0.35,2.2,0.34,4.93,2.32,42.6,60.7,15.3,273,119.1,22.2,2,2,0.2,0.4,1.1,0.23,1.7,7.4,,70.2,1.36,11.61,0.1,0.23,443,482,0.14,1.1,3.94,2.84,295,4,6,0.5
"Gal and Pyle, 2012, NWT OR 2012 009",well,Hoosier Ridge N-22,300N226530127300,96E,65.36579,-127.5820856,Ramparts,Lower Ramparts,rock chips,895,"HOOSIER RIDGEN-22-895			",,26.2,6.61,2.73,1.49,32.51,0.28,1.22,0.29,0.04,0.03,0.011,36,6,28.3,99.71,1017,,2,5.3,3.1,7.2,2.1,5.2,62.3,<1,678.7,0.3,5.4,1.4,58,0.7,53.7,12.7,19.6,34.2,4.12,16.4,2.9,0.54,2.85,0.38,1.79,0.41,1.3,0.18,0.86,0.17,7.6,1.01,1.1,8.1,8.1,56,18,4.6,<0.1,<0.1,<0.1,<0.1,<0.5,0.01,0.1,<0.5,,70.3,0.26,0.95,0.22,0.25,455,494,0.13,0.12,0.88,0.76,108,15,28,4.3
"Gal and Pyle, 2012, NWT OR 2012 009",well,Hoosier Ridge N-22,300N226530127300,96E,65.36579,-127.5820856,Hare Indian,Bell Creek,rock chips,945,"HOOSIER RIDGEN-22-945			",,52.24,18.29,7.18,2.29,4.62,0.67,2.66,0.83,0.12,0.13,0.015,57,17,10.7,99.78,619,,4,19.2,7.7,23.3,4.4,15.3,139.2,3,238.1,1,15.1,2.9,132,1.6,166.1,33.4,48.5,96.2,10.98,41.6,7.79,1.53,6.72,1.09,5.8,1.21,3.29,0.53,3.36,0.5,1.75,0.2,0.2,24.7,24.5,108,47.8,5.2,<0.1,<0.1,0.3,<0.1,<0.5,0.02,0.1,<0.5,,70.5,0.1,0.61,0.14,0.21,452,491,0.13,0.07,0.47,0.4,130,28,45,0.3
"Gal and Pyle, 2012, NWT OR 2012 009",well,Hoosier Ridge N-22,300N226530127300,96E,65.36579,-127.5820856,Hare Indian,Bell Creek,rock chips,1015,"HOOSIER RIDGEN-22-1015			",,54,20.25,7.04,2.31,2.43,0.68,2.88,0.86,0.09,0.07,0.017,72,19,9.1,99.77,597,,3,22.6,9.5,25,3.9,16.4,151.2,4,194.2,1,15.4,3.3,156,2,151.5,33.8,49.2,94.9,11.08,40.8,7.79,1.54,6.68,1.06,5.63,1.14,3.35,0.48,3.04,0.46,1.11,1.04,2.4,21.9,20.2,214,56.6,6.1,0.3,0.1,0.3,<0.1,<0.5,0.03,0.2,<0.5,,70.5,0.09,0.48,0.16,0.24,450,489,0.11,0.06,0.46,0.4,104,24,52,0.5
"Gal and Pyle, 2012, NWT OR 2012 009",well,Hoosier Ridge N-22,300N226530127300,96E,65.36579,-127.5820856,Hare Indian,Bluefish,rock chips,1025,"HOOSIER RIDGEN-22-1025			",,47.83,16.7,6.33,2.87,6.99,0.56,2.63,0.72,0.07,0.06,0.014,100,16,14.9,99.72,804,,2,18.7,8.4,21.4,3.4,12.6,138.6,3,268.2,0.8,12,8.3,210,1.5,122.3,28.8,41.5,74.4,8.68,34.2,5.96,1.17,4.92,0.78,4.53,0.86,2.75,0.38,2.6,0.4,4.48,1.42,19.4,29.8,19.2,273,82.8,12.2,1.2,0.6,0.2,0.1,<0.5,0.06,0.6,2.6,,70.8,1.43,7.17,0.17,0.25,453,492,0.16,0.73,3.89,3.16,184,4,6,1.7
"Gal and Pyle, 2012, NWT OR 2012 009",well,Hoosier Ridge N-22,300N226530127300,96E,65.36579,-127.5820856,Hare Indian,Bluefish,rock chips,1035,"HOOSIER RIDGEN-22-1035			",,51.21,15.54,5.24,2.29,7.04,0.54,2.57,0.66,0.07,0.04,0.013,128,14,14.5,99.72,680,,3,16.5,8.7,19.6,3.5,12.2,146.4,3,283.2,0.8,11.8,10.9,302,1.6,116.5,30.4,41.2,71.1,8.91,33,6.03,1.19,5.06,0.79,4.53,0.92,2.78,0.4,2.89,0.39,4.88,1.6,33.7,34.6,17.4,286,117.5,18.1,2.7,1.2,0.2,0.3,<0.5,0.11,0.9,5,,70.2,0.89,8.6,0.09,0.21,450,489,0.16,0.8,3.53,2.73,244,5,6,0.9
"Pyle and Gal, 2012, NWT OR 2012 008",outcrop,Imperial Anticline,,106H,65.456065,-128.6818192,Hare Indian,Hare Indian,rock pulp,1,11IA-002,,20.3,5.69,2.26,1.95,36.03,0.17,0.89,0.31,0.04,0.04,0.005,<20,6,32.1,99.76,188,,<1,6,3.1,8.1,2.5,6.6,53,1,1351.7,0.4,5.9,1.4,40,<0.5,84.7,16.7,21.5,42.1,4.84,16.5,3.39,0.67,2.88,0.51,2.92,0.52,1.77,0.25,1.52,0.24,8.43,0.3,1.4,5,7.6,23,13.3,2.7,<0.1,<0.1,<0.1,<0.1,1.2,<0.01,0.2,<0.5,,70,0.04,0.52,0.07,0.39,384,423,0.01,0.06,0.26,0.2,200,4,150,9.8
"Pyle and Gal, 2012, NWT OR 2012 008",outcrop,Imperial Anticline,,106H,65.456065,-128.6818192,Hare Indian,Hare Indian,rock pulp,0-3,11IA-003,,20.38,5.75,2.24,2.1,35.3,0.17,0.9,0.32,0.05,0.04,0.006,<20,5,32.5,99.76,181,,<1,6.3,3,7.9,2.3,6.3,53.4,<1,1246.6,0.4,5.9,1.2,36,<0.5,73,15.7,20.6,40.9,4.77,16.8,3.44,0.68,2.83,0.5,2.57,0.6,1.82,0.26,1.46,0.24,8.57,0.31,1.6,5.7,7.7,27,14.2,2,<0.1,<0.1,<0.1,<0.1,0.6,<0.01,0.3,<0.5,,70,0.05,0.23,0.18,0.37,441,480,0.06,0.04,0.22,0.18,105,27,168,9.9
"Pyle and Gal, 2012, NWT OR 2012 008",outcrop,Imperial Anticline,,106H,65.456065,-128.6818192,Hare Indian,Hare Indian,rock pulp,3 to 6,11IA-004,,18.83,5.07,2,1.82,37.72,0.16,0.79,0.28,0.04,0.04,0.005,34,5,33,99.77,331,,<1,5.3,2.6,6.7,2.1,5.4,44.6,1,1291.2,0.4,5.1,1.2,31,<0.5,67.9,14.2,18.7,37.6,4.29,16.2,2.95,0.58,2.53,0.43,2.47,0.53,1.54,0.24,1.23,0.22,9.09,0.28,1.5,5,7.2,23,13,2.5,<0.1,<0.1,<0.1,<0.1,0.7,<0.01,0.2,<0.5,,70.1,0.04,0.21,0.17,0.33,440,479,0.06,0.04,0.24,0.2,88,25,138,10.2
"Pyle and Gal, 2012, NWT OR 2012 008",outcrop,Imperial Anticline,,106H,65.456065,-128.6818192,Hare Indian,Hare Indian,rock pulp,6 to 9,11IA-005,,17.67,4.9,1.84,1.77,38.54,0.15,0.74,0.26,0.05,0.04,0.004,<20,4,33.8,99.79,94,,<1,5,2.4,5.8,1.6,4.9,43.7,1,1215.5,0.3,4.7,1,33,<0.5,61.4,13.3,16.9,34.6,3.99,15.7,2.9,0.55,2.34,0.4,2.34,0.45,1.4,0.21,1.5,0.2,9.04,0.2,1.2,4.5,6.6,21,10.4,2,<0.1,<0.1,<0.1,<0.1,<0.5,<0.01,0.2,<0.5,,70.3,0.03,0.23,0.11,0.31,440,479,0.02,0.04,0.24,0.2,96,8,129,9.8
"Pyle and Gal, 2012, NWT OR 2012 008",outcrop,Imperial Anticline,,106H,65.456065,-128.6818192,Hare Indian,Hare Indian,rock pulp,9 to 12,11IA-006,,15.24,3.78,1.46,1.16,41.7,0.14,0.6,0.22,0.04,0.04,0.003,<20,4,35.4,99.78,187,,<1,4.8,1.6,5.1,1.5,4.2,33.8,1,1282.3,0.3,4.4,0.9,25,<0.5,63.2,13.1,15.7,31.2,3.66,12.9,2.53,0.51,2.14,0.39,2.2,0.45,1.29,0.2,1.07,0.17,9.94,0.18,1.6,4,5.9,15,9.3,1.9,<0.1,<0.1,<0.1,<0.1,<0.5,<0.01,0.1,<0.5,,70.3,0.03,0.27,0.11,0.38,440,479,0.11,0.05,0.24,0.19,112,46,158,10.1
"Gal and Pyle, 2012, NWT OR 2012 009",well,Imperial Redstone J-42,300J426420124300,96C,64.195093,-124.6403409,Hume,Hume,rock chips,625,IMPERIAL REDSTONE J-42-2072,,54.74,21.06,5.95,1.83,1.68,0.56,3.12,0.93,0.08,0.04,0.018,56,19,9.8,99.8,992,,3,18.7,10.4,25.3,3.1,15.4,182.9,4,144,1,15.4,3,140,1.6,134.6,25.6,44.5,85.3,9.81,33.4,5.93,1.06,4.73,0.77,4.25,0.95,2.83,0.4,2.9,0.41,0.93,1.1,0.7,16,11.7,107,48.1,13.4,<0.1,<0.1,0.3,<0.1,1.2,0.06,0.2,0.6,,70.3,2.35,20.2,0.1,1.06,437,476,0.96,1.96,4.74,2.78,427,20,22,1.3
"Pyle and Gal, 2013, NWT_OR_2013_05",outcrop,Imperial River,,96E,65.220193,-127.5994046,Canol,Canol,rock chips,0-3.0,12-IR-1,,76.05,7.91,3.09,0.64,0.25,0.29,1.49,0.37,0.04,<0.01,0.01,122,8,9.5,99.63,1874,,2,12.6,3.8,9.6,1.8,4.8,74.6,1,124.8,0.4,5.1,11,549,0.7,71.3,11.6,18.4,30.4,3.93,16.4,2.27,0.44,1.71,0.26,1.92,0.38,1.14,0.21,1.22,0.19,3.86,2.02,45.6,74.2,8.6,211,100.7,18.5,2.9,3.1,0.1,0.4,<0.5,0.12,2.2,10.1,,70.4,2.81,11.04,0.2,0.09,441,481,0.05,1.16,3.68,2.52,300,1,2,
"Pyle and Gal, 2013, NWT_OR_2013_05",outcrop,Imperial River,,96E,65.220193,-127.5994046,Canol,Canol,rock chips,3.0-6.0,12-IR-2,,73.06,10.86,1.78,0.86,0.32,0.27,2.06,0.44,0.02,<0.01,0.011,56,9,10,99.7,1711,,5,4.4,6.3,13.7,2.3,5.1,102.4,2,131.1,0.5,3.4,6.4,323,1.1,79.6,12.1,22.3,38.1,4.54,17.4,2.18,0.38,1.46,0.24,1.58,0.32,1.26,0.18,1.08,0.22,3.21,0.98,21.8,25.2,7.8,47,37,9.2,0.3,0.9,0.1,0.2,<0.5,0.15,1.5,5.5,,70.2,1.34,7.57,0.15,0.03,435,475,0.13,0.75,3.19,2.44,237,4,1,
"Pyle and Gal, 2013, NWT_OR_2013_05",outcrop,Imperial River,,96E,65.220193,-127.5994046,Canol,Canol,rock chips,6.0-9.0,12-IR-3,,70.39,13.36,1.38,1.02,0.11,0.27,2.52,0.52,0.04,<0.01,0.013,48,11,9.9,99.55,2932,,<1,2.3,7.2,16.7,2.5,6.9,129.6,2,111.2,0.6,4.4,6.4,423,1.1,84.7,14.7,25.3,43,5.21,17,2.54,0.51,1.85,0.28,1.89,0.46,1.51,0.24,1.61,0.25,3.64,0.53,11.6,21,7.6,30,21.9,8.5,0.1,1.2,0.2,0.2,0.6,0.12,1.5,4.1,,70.6,0.89,9.75,0.08,0.01,441,481,0.08,0.89,3.45,2.56,283,2,0,
"Pyle and Gal, 2013, NWT_OR_2013_05",outcrop,Imperial River,,96E,65.220193,-127.5994046,Canol,Canol,rock chips,9.0-10.6,12-IR-4,,58.93,13.44,5.19,1.28,3.02,0.25,2.56,0.52,0.08,<0.01,0.014,54,12,14.4,99.64,1891,,<1,4.3,7.8,16.7,2.1,6.8,128.9,2,165,0.7,11.9,6.2,364,0.7,83.3,15.1,25.4,45.3,5.46,23.7,3.4,0.6,2.5,0.36,2.29,0.52,1.5,0.25,1.83,0.25,2.87,2.05,16.7,60.7,8.1,65,34.3,11.2,1.9,0.9,0.2,0.3,1.5,0.09,1.2,5.4,,70.9,0.38,4.31,0.08,1.12,444,484,0.24,0.44,2.81,2.37,153,9,40,
"Pyle and Gal, 2013, NWT_OR_2013_05",outcrop,Imperial River,,96E,65.220193,-127.5994046,Imperial,Imperial,rock chips,10.6-10.9,12-IR-6,,67.22,14.96,2.28,1.2,0.32,0.26,2.83,0.58,0.04,<0.01,0.014,37,12,10,99.71,1508,,2,3.2,9,18.8,2.9,8.2,147.8,2,117.3,0.5,4.8,5,335,1,93.3,15,27.5,46.5,5.6,20.8,2.65,0.51,1.9,0.3,1.97,0.47,1.54,0.21,1.53,0.23,2.41,0.55,13.2,18.5,10.7,45,23.1,8.6,0.2,0.7,0.2,0.2,1,0.08,1.1,3.6,,70.3,0.4,5.62,0.07,0.08,438,478,0.12,0.51,2.66,2.15,211,5,3,
"Pyle and Gal, 2012, NWT OR 2012 008",outcrop,Little Bear 2,,96D,64.473825,-126.4853405,Bluefish,Bluefish,rock pulp,0 to 2.5,11LB-001,,64.55,8.04,2.19,0.81,8,0.08,1.56,0.33,0.06,0.02,0.01,167,8,14.1,99.74,1044,,<1,8.3,5.1,9.9,1.6,6.7,78.8,<1,275.8,0.4,4.7,17.8,305,0.8,67.3,24,23,33.9,4.83,18.5,3.54,0.69,3.36,0.53,3.06,0.63,1.92,0.3,1.7,0.32,6.86,1.42,60.4,45,8,241,141.4,12.6,7.5,2.3,<0.1,0.2,<0.5,0.13,0.7,11.1,,70.6,2.12,8.5,0.2,0.38,440,479,0.01,0.89,5.05,4.16,168,0,8,1.7
"Pyle and Gal, 2012, NWT OR 2012 008",outcrop,Little Bear 2,,96D,64.473825,-126.4853405,Bluefish,Bluefish,rock pulp,2.5 to 3.5,11LB-002,,63.54,9.48,2.69,1.42,5.84,0.09,1.84,0.4,0.09,0.01,0.014,207,9,14.3,99.7,1110,,3,7.8,5.8,12.2,1.6,7.7,93,1,310.5,0.4,5.3,23.8,346,1.2,74.3,28.1,26.1,39.8,5.88,22.7,4.24,0.9,3.9,0.61,3.7,0.81,2.31,0.35,2.11,0.32,6.88,1.72,81.4,55.1,9.5,269,170.5,15.9,4.4,3,0.1,0.2,<0.5,0.22,1,10.8,,70.6,1.77,7.55,0.19,0.32,448,487,0.03,0.79,5.36,4.57,141,1,6,1.4
"Pyle and Gal, 2012, NWT OR 2012 008",outcrop,Little Bear 2,,96D,64.473825,-126.4853405,Bluefish,Bluefish,rock pulp,3.5 to 4.5,11LB-003,,42.4,7.5,2.44,5.68,15.97,0.07,1.46,0.3,0.06,0.04,0.009,130,7,23.7,99.67,979,,5,6.3,5.1,9.8,1.3,6.1,74.8,1,587.7,0.4,4.3,18.3,169,0.5,52,23.6,21.8,32.7,4.67,20.1,3.58,0.76,3.49,0.51,3,0.67,1.88,0.28,1.73,0.28,8.96,1.3,55.5,33.6,6.5,106,94.9,11.4,1.7,1.7,<0.1,<0.1,<0.5,0.18,0.7,4.1,,70.6,1.44,5.22,0.22,0.3,450,489,0,0.57,3.87,3.3,135,0,8,5.1
"Pyle and Gal, 2012, NWT OR 2012 008",outcrop,Little Bear 2,,96D,64.473825,-126.4853405,Bluefish,Bluefish,rock pulp,4.5 to 5.5,11LB-004,,54.6,9.09,2.47,1.24,11.82,0.09,1.77,0.36,0.07,0.01,0.011,176,9,18.1,99.69,1136,,2,7.9,6.7,11,1.5,7.2,92.8,<1,443.8,0.4,4.9,17.6,286,1,65,29.1,27.1,38.7,5.59,24.5,4.04,0.8,4.04,0.61,3.62,0.71,2.22,0.34,2.09,0.33,8.21,1.6,64.3,51.7,8.4,262,131.1,15.5,3.4,2.2,0.1,0.3,<0.5,0.2,0.5,6.4,,70.7,1.7,7.66,0.18,0.36,453,492,0.03,0.79,5.49,4.7,140,1,7,2.7
"Pyle and Gal, 2012, NWT OR 2012 008",outcrop,Little Bear 2,,96D,64.473825,-126.4853405,Bluefish,Bluefish,rock pulp,5.5 to 6.5,11LB-005,,41.77,7.44,2.19,1.42,20.78,0.07,1.48,0.33,0.09,0.03,0.016,217,8,24,99.64,1080,,<1,6.4,5.2,9.9,1.7,7.3,76.6,<1,517.6,0.4,4.8,21.8,407,0.7,66.1,35,29.1,37.2,5.79,23.8,4.41,0.94,4.27,0.68,3.72,0.97,2.62,0.42,2.34,0.42,9.93,1.2,70.7,46.8,6.5,301,152.5,14.6,5.2,2.6,<0.1,0.4,<0.5,0.13,0.3,6.8,,70.1,1.16,6.55,0.15,0.29,449,488,0.01,0.65,5.14,4.49,127,0,6,4.8
"Pyle and Gal, 2012, NWT OR 2012 008",outcrop,Little Bear 2,,96D,64.473825,-126.4853405,Bluefish,Bluefish,rock pulp,6.5 to 7.5,11LB-006,,37.86,7.33,2.04,1.4,22.72,0.08,1.41,0.32,0.15,0.03,0.011,282,8,26.2,99.63,889,,2,7.6,5.2,9.7,1.8,6,70.6,1,740,0.4,4.2,30,388,0.6,63.7,39.8,30.7,36.8,5.99,25.3,4.13,0.92,4.67,0.68,3.78,1.01,2.53,0.42,2.85,0.43,10.87,1.17,78.1,46.9,7.2,330,231.5,19.9,3.9,3.6,<0.1,0.5,<0.5,0.13,0.5,8.2,,70.7,0.94,6.17,0.13,0.52,451,490,0.31,0.63,5.65,5.02,109,5,9,5.3
"Pyle and Gal, 2012, NWT OR 2012 008",outcrop,Little Bear 2,,96D,64.473825,-126.4853405,Bluefish,Bluefish,rock pulp,7. 5 to 8.5,11LB-007,,22.82,5.44,1.7,1.63,32.03,0.08,1.09,0.25,0.07,0.03,0.01,201,9,34.4,99.58,1207,,3,6.1,3.7,6.2,1.3,5.3,52.8,<1,1094.2,0.2,4,25.8,399,2,57,45.4,39.6,41,7.58,30.9,5.23,1.13,5.64,0.84,5.24,1.26,4.08,0.62,3.76,0.59,14.57,1.23,34.1,45.2,6.3,200,138.6,12.2,2.9,3.4,<0.1,0.5,<0.5,0.11,0.5,6.1,,70.5,1.1,8.78,0.11,0.52,458,497,0.16,0.85,7.14,6.29,123,2,7,7.5
"Pyle and Gal, 2012, NWT OR 2012 008",outcrop,Little Bear 2,,96D,64.473825,-126.4853405,Bluefish,Bluefish,rock pulp,8.5 to 9.5,11LB-008,,23.04,6.02,2.94,8.11,24.37,0.12,1.2,0.3,0.09,0.1,0.01,117,7,33.3,99.57,737,,<1,6.7,3.7,9.3,1.5,6,55.8,2,824.5,0.5,4.7,17.7,247,2.1,56.3,26.9,24.9,34.8,4.56,17.3,3.38,0.76,2.82,0.5,2.44,0.61,1.95,0.31,1.99,0.25,12.72,1.53,41.8,29.7,6.9,129,68.9,12,2.3,1.9,0.1,0.2,<0.5,0.16,0.4,4.6,,70.7,0.62,5.17,0.11,0.78,450,489,0.22,0.52,5.08,4.56,102,4,15,7.7
"Pyle and Gal, 2012, NWT OR 2012 008",outcrop,Little Bear 2,,96D,64.473825,-126.4853405,Canol,Canol,rock pulp,9.5 to 12,11LB-009,,25.56,6.8,3,4.71,27.2,0.06,1.26,0.29,0.07,0.06,0.009,83,10,30.6,99.62,1204,,<1,6,3.8,7.4,1.6,4.1,61.5,<1,818.7,0.2,4,10.2,174,0.7,47.8,48.8,38.2,44.4,6.43,27.4,4.41,1.03,4.82,0.75,4.71,1.09,3.35,0.53,3.32,0.53,10.27,1.02,23.5,18.9,5.1,107,58.1,9.6,1.1,1,<0.1,0.1,<0.5,0.09,0.4,2.4,,70.8,0.73,2.92,0.2,0.36,455,494,0.01,0.32,2.65,2.33,110,0,14,7.7
"Pyle and Gal, 2012, NWT OR 2012 008",outcrop,Little Bear 2,,96D,64.473825,-126.4853405,Canol,Canol,rock pulp,12 to 15,11LB-010,,53.26,9.96,4.11,4.71,7.55,0.08,1.86,0.37,0.07,0.04,0.014,131,10,17.5,99.55,1693,,<1,6.1,5.5,11.7,1.2,6,91.4,1,729.7,0.3,5.5,9.3,310,1.2,52.4,32.4,25.9,39.7,5.55,19.4,4,0.91,4.11,0.64,3.71,0.82,2.84,0.36,2.31,0.37,6.22,1.99,41.1,31,7.7,190,109.7,14.6,2.8,1,0.1,0.3,<0.5,0.19,0.4,5.7,,70.5,1.13,3.94,0.22,0.3,454,493,0.01,0.44,3.35,2.91,118,0,9,2.9
"Pyle and Gal, 2012, NWT OR 2012 008",outcrop,Little Bear 2,,96D,64.473825,-126.4853405,Canol,Canol,rock pulp,15 to 18,11LB-011,,73.18,7.69,1.78,1.17,2.15,0.09,1.42,0.29,0.06,<0.01,0.011,127,7,11.8,99.68,1754,,<1,6,3.7,9.6,1.5,4.5,69.6,<1,377.4,0.3,3.7,8.9,301,0.6,44.5,21.6,19.8,30.9,4.37,15.7,2.59,0.59,2.92,0.43,2.61,0.56,1.7,0.25,1.68,0.25,6,1.11,52.6,31.3,7.6,140,89.7,10.2,2,1.2,<0.1,0.3,<0.5,0.16,0.4,4.3,,70.9,2.29,8.67,0.21,0.2,439,478,0.05,0.92,5.22,4.3,166,1,4,0.7
"Pyle and Gal, 2012, NWT OR 2012 008",outcrop,Little Bear 2,,96D,64.473825,-126.4853405,Canol,Canol,rock pulp,18 to 21,11LB-012,,76.8,6.13,1.56,0.93,1.5,0.09,1.15,0.24,0.08,<0.01,0.009,124,5,11.2,99.68,1879,,<1,5.9,2.8,7.4,1.2,4.4,53.5,<1,290.3,0.2,3.4,8.7,300,1,40.4,19.5,15.9,26,3.76,15.7,2.87,0.59,2.84,0.42,2.4,0.54,1.46,0.23,1.43,0.21,6.57,1.01,39.3,43.4,7.3,162,93.4,7.1,2.1,1.2,<0.1,0.3,<0.5,0.12,0.2,4.7,,70.2,3.46,11.15,0.24,0.36,433,472,0.04,1.23,5.98,4.75,186,1,6,0.5
"Pyle and Gal, 2012, NWT OR 2012 008",outcrop,Little Bear 2,,96D,64.473825,-126.4853405,Canol,Canol,rock pulp,21 to 24,11LB-013,,72.41,5.96,1.64,1.69,3.38,0.09,1.15,0.25,0.09,0.01,0.013,112,6,13,99.65,1756,,<1,4.4,2.5,7.1,1.4,3.9,50.7,<1,466.5,0.3,3.5,9.2,322,0.8,45.1,23.2,18,27.1,4.03,16.4,2.81,0.55,3.03,0.46,2.72,0.56,1.74,0.27,1.79,0.27,7.1,0.93,32.8,39.2,7.5,119,79.2,7.9,1.7,1.3,0.1,0.3,<0.5,0.11,0.2,4.8,,70.5,3.55,10.89,0.25,0,430,469,0,1.2,5.74,4.54,190,0,0,1.1
"Pyle and Gal, 2012, NWT OR 2012 008",outcrop,Little Bear 2,,96D,64.473825,-126.4853405,Canol,Canol,rock pulp,24 to 27,11LB-014,,76.42,5.32,1.32,1.27,2.21,0.09,1.03,0.22,0.08,0.01,0.009,107,5,11.7,99.67,1861,,2,4.6,2.6,6.6,1.1,4.3,45.7,<1,339.1,0.3,3.1,8.9,316,0.9,38.8,21.1,15.9,24.5,3.63,13.5,2.71,0.57,2.72,0.42,2.24,0.55,1.57,0.21,1.37,0.22,6.68,0.9,35.5,37,6.2,174,75.9,6.4,2.3,1.1,<0.1,0.3,<0.5,0.09,0.1,3.7,,70.8,4.25,11.67,0.27,0.14,432,471,0,1.33,5.73,4.4,204,0,2,0.8
"Pyle and Gal, 2012, NWT OR 2012 008",outcrop,Little Bear 2,,96D,64.473825,-126.4853405,Canol,Canol,rock pulp,27 to 30,11LB-015,,68.37,5.96,1.33,0.51,6.81,0.09,1.25,0.28,0.1,0.01,0.006,94,5,14.9,99.65,1794,,<1,6.7,2.7,7.8,1.4,5.1,52.3,3,460.5,0.4,3.7,9.2,284,1,56.5,28.3,19.3,33.1,4.45,13.5,2.82,0.57,3.39,0.53,2.96,0.74,2.12,0.33,2.14,0.25,8.51,0.77,49.3,36.4,11.4,74,50.9,6.8,1.2,1,0.1,0.3,<0.5,0.11,0.3,3.4,,70.7,3.14,11.57,0.21,0.33,435,474,0.09,1.24,8,6.76,145,1,4,1.6
"Pyle and Gal, 2012, NWT OR 2012 008",outcrop,Little Bear 2,,96D,64.473825,-126.4853405,Canol,Canol,rock pulp,30 to 33,11LB-016,,57.54,5.12,1.62,0.69,14.21,0.11,1.09,0.26,0.12,0.01,0.006,73,7,18.9,99.72,1664,,<1,7.2,1.8,6.9,1.5,4.9,42.7,1,502,0.5,3.9,12.1,148,1.8,56.5,28.4,19.8,35,4.47,17.7,3.81,0.72,4.04,0.58,3.54,0.81,2.19,0.33,1.95,0.3,9,1.05,45,47.7,10.2,32,56.2,7.6,0.6,0.9,0.4,0.2,<0.5,0.14,0.1,4.5,,70.4,1.88,8.68,0.18,0.42,447,486,0.15,0.9,7.02,6.12,124,2,6,3.1
"Pyle and Gal, 2012, NWT OR 2012 008",outcrop,Little Bear 2,,96D,64.473825,-126.4853405,Canol,Canol,rock pulp,33 to 36,11LB-017,,76.13,7.48,1.11,0.39,0.06,0.09,1.52,0.4,0.06,<0.01,0.011,74,6,12.4,99.68,2235,,2,1.2,3,9.7,1.7,7.2,65.4,<1,162.9,0.5,4.4,9.2,280,1.4,67.8,10.8,24.3,44.5,5.8,22.1,2.42,0.29,1.34,0.21,1.25,0.3,1.03,0.17,1.2,0.19,7.76,0.6,48.5,13,12.4,9,28.2,9.3,<0.1,1.8,0.3,0.3,<0.5,0.15,0.3,4.8,,69.9,1.8,10.38,0.15,0.63,430,469,0.82,1.08,8.28,7.2,125,10,8,0.2
"Pyle and Gal, 2012, NWT OR 2012 008",outcrop,Little Bear 2,,96D,64.473825,-126.4853405,Canol,Canol,rock pulp,36 to 39,11LB-018,,78.93,6.39,0.8,0.3,0.07,0.06,1.31,0.32,0.05,<0.01,0.012,61,4,11.5,99.71,2123,,6,0.8,2.6,8.2,1.8,5.7,56.5,1,131.1,0.3,3.7,12.8,200,1.4,57.9,8.1,20.5,36.3,4.76,16.3,2.12,0.22,0.96,0.15,0.88,0.25,0.88,0.13,1.04,0.15,5.42,0.32,44.6,7,12,3,41.8,5.4,<0.1,1.4,0.3,0.1,1.9,0.08,1.2,3.4,,71,0.04,0.49,0.07,1.92,443,482,1.22,0.2,4.95,4.75,10,25,39,0.3
"Pyle and Gal, 2012, NWT OR 2012 008",outcrop,Little Bear 2,,96D,64.473825,-126.4853405,Canol,Canol,rock pulp,39 to 42,11LB-019,,79.32,6.61,1.1,0.31,0.29,0.08,1.39,0.34,0.06,<0.01,0.006,54,4,10.1,99.63,2894,,<1,0.8,2.7,8.1,1.8,6.5,58.8,<1,178.7,0.5,4,6.4,192,0.9,64.7,8.1,21.4,40.5,4.67,17.7,2.17,0.31,0.95,0.16,1.21,0.24,0.76,0.14,0.95,0.17,4.68,0.47,36.2,9.1,11.7,5,34.4,8.5,<0.1,1.4,0.2,0.2,2.2,0.1,1.3,4.1,,70.5,0.08,0.9,0.08,1.8,430,469,1.11,0.21,4.33,4.12,21,26,42,0.2
"Pyle and Gal, 2012, NWT OR 2012 008",outcrop,Little Bear 2,,96D,64.473825,-126.4853405,Canol,Canol,rock pulp,42 to 45,11LB-020,,73.53,9.82,1.28,0.47,0.23,0.3,2.14,0.52,0.06,<0.01,0.014,59,7,11,99.31,5413,,3,1.7,4.2,11.8,2.2,9.2,86.2,1,222.2,0.6,6.1,7,221,1.9,99.6,12.9,30.2,55,6.12,23.2,2.45,0.31,1.61,0.26,1.58,0.42,1.34,0.24,1.47,0.24,5.45,0.59,28.3,11,14.5,3,30.5,4.7,<0.1,1.1,0.3,0.3,1.1,0.3,0.3,6.3,,70.4,0.42,3.75,0.1,0.69,439,478,0.56,0.41,5.3,4.89,71,11,13,0.2
"Pyle and Gal, 2012, NWT OR 2012 008",outcrop,Little Bear 2,,96D,64.473825,-126.4853405,Canol,Canol,rock pulp,45 to 48,11LB-021,,76.53,8.9,1.31,0.48,0.2,0.18,1.93,0.51,0.07,<0.01,0.012,50,6,9.5,99.61,2896,,<1,1.5,3.4,10.8,3.4,8.9,78.4,1,182.1,0.6,6,6.8,186,1.2,112.7,12.7,27.4,54.4,6.06,21.1,2.79,0.33,1.55,0.28,1.69,0.44,1.14,0.25,1.72,0.28,4.69,0.79,12.4,6.5,16.1,6,13.6,2,<0.1,0.6,0.3,0.3,<0.5,0.31,0.3,4.6,,70.7,1.34,5.63,0.19,0.3,424,463,0.25,0.6,4.45,3.85,127,6,7,0.1
"Pyle and Gal, 2012, NWT OR 2012 008",outcrop,Little Bear 2,,96D,64.473825,-126.4853405,Canol,Canol,rock pulp,48 to 51,11LB-022,,74.72,9.78,1.33,1.05,0.99,0.12,1.97,0.51,0.05,0.02,0.012,40,8,9,99.57,3114,,6,3.8,3.9,12.7,3.1,8.6,83.1,<1,222.3,0.5,7.2,5.9,168,1.1,104,13.4,28.7,57.5,6.34,23.4,3.44,0.41,1.85,0.3,1.57,0.45,1.51,0.23,1.61,0.25,3.91,0.71,12,11.2,12.8,25,18.6,2.5,0.3,0.7,0.2,0.3,0.8,4.38,0.3,5.2,,70.6,0.44,2.48,0.15,0.47,438,477,0.5,0.29,3.42,3.13,73,15,14,0.4
"Pyle and Gal, 2012, NWT OR 2012 008",outcrop,Little Bear 2,,96D,64.473825,-126.4853405,Canol,Canol,rock pulp,54 to 57,11LB-023,,78.98,6.49,0.63,0.35,0.09,0.2,1.39,0.33,0.02,<0.01,0.009,32,5,11.2,99.66,2496,,<1,0.9,3.4,9.7,1.8,7,66.6,1,118.5,0.5,4.4,11.2,265,0.8,67,9.1,25.1,41,5.78,23.6,3.39,0.32,1.57,0.23,1.17,0.29,0.86,0.17,1,0.18,4.51,0.18,36.2,5.7,7.6,2,27.4,3.1,<0.1,1.3,0.3,0.1,2.5,0.08,1.1,5.8,,70.1,0.17,1.34,0.11,2.13,441,480,1.05,0.27,5.34,5.07,25,20,40,0.2
"Pyle and Gal, 2012, NWT OR 2012 008",outcrop,Little Bear 2,,96D,64.473825,-126.4853405,Canol,Canol,rock pulp,57 to 60,11LB-024,,85.25,4.77,0.54,0.28,0.13,0.07,1,0.25,0.03,<0.01,0.009,40,4,7.3,99.65,2188,,<1,1.1,2.3,8.3,1.5,5.1,49,<1,111.3,0.4,3.8,6.9,666,0.9,53.4,9.9,19.7,29.9,4.13,17.4,2.67,0.28,1.35,0.19,1.14,0.25,0.78,0.14,0.91,0.17,3.64,0.16,23.6,9,5.8,1,23.1,2.4,<0.1,2,<0.1,0.2,1.8,0.43,0.5,4.3,,70.6,0.06,1.62,0.03,1.41,436,475,0.37,0.22,3.59,3.37,45,10,39,0.2
"Kabanov et al., 2015, GSC OF7948",well,Little Bear N-09,300N096500126300,96E,64.982154,-126.5236909,Imperial,Loon Creek (lower),Core,1670,N09-1670,,67.11,12.38,4.17,1.42,0.75,0.61,2.4,0.61,0.11,0.02,0.013,145,13,9.8,99.4,3128,0.3128,2,16.1,6.7,14.9,3.1,9.1,113.6,2,157.2,0.7,8.7,10.8,841,1.1,114.9,28.1,31.2,55.5,6.9,26.4,5.02,1.09,4.76,0.74,4.29,0.96,2.34,0.39,2.48,0.39,3.15,2.11,26,60,13.8,354,124.7,24.2,3,2.8,0.2,0.4,2.4,0.18,1.6,8.5,1670,70.8,2.55,3,0.46,0.26,446,486,0.04,0.48,2.49,2.01,120,2,10,
"Kabanov et al., 2015, GSC OF7948",well,Little Bear N-09,300N096500126300,96E,64.982154,-126.5236909,Imperial,Loon Creek (lower),Core,1670.5,N09-1670.5,,67.14,11.3,5.04,1.69,0.7,0.55,2.13,0.53,0.09,0.03,0.01,113,12,10.3,99.47,3462,0.3462,5,14.2,5.8,13.2,2.7,8.2,100.3,2,146.4,0.6,7,11.7,301,1.1,92.9,20.4,25.5,49,5.85,22.3,4.09,0.87,3.73,0.56,3.12,0.69,1.84,0.31,1.91,0.31,3.72,1.64,22.6,52.8,12.2,161,86,15.9,1.4,2.1,0.2,0.3,<0.5,0.15,1.8,3.9,1670.5,70.3,3.07,4.76,0.39,0.24,456,496,0.05,0.67,3.1,2.43,154,2,8,
"Kabanov et al., 2015, GSC OF7948",well,Little Bear N-09,300N096500126300,96E,64.982154,-126.5236909,Imperial,Loon Creek (lower),Core,1671,N09-1671,,69.06,11,4.04,1.33,0.83,0.54,2.14,0.56,0.1,0.02,0.011,127,11,9.8,99.49,2645,0.2645,5,15.2,5.4,12.6,2.6,8.7,97.7,1,145.4,0.6,7.8,9.8,721,1.2,103.9,22.7,27.8,50.5,6.02,24.8,4.37,0.96,4.36,0.61,3.65,0.78,2.18,0.33,2.23,0.34,3.5,2.07,24,54,13.1,290,110.2,19.3,2.9,2.7,0.2,0.4,3.5,0.16,1.9,9,1671,70.1,3.85,4.33,0.47,0.28,453,493,0.04,0.69,3.04,2.35,142,1,9,
"Kabanov et al., 2015, GSC OF7948",well,Little Bear N-09,300N096500126300,96E,64.982154,-126.5236909,Imperial,Loon Creek (lower),Core,1671.5,N09-1671.5,,65.67,11.54,4.78,1.75,1.56,0.55,2.23,0.57,0.08,0.03,0.01,115,12,10.8,99.55,2591,0.2591,4,16.3,5.5,12.1,2.5,8.4,103.6,2,175.5,0.6,7.8,9.6,355,0.9,98.4,21,27.4,49.1,5.88,23,4.48,0.9,3.83,0.57,3.53,0.73,2.16,0.32,2.16,0.31,3.69,2.32,28.8,62.1,17.6,208,90.8,20.4,1.6,2.5,0.2,0.3,2.3,0.14,1.9,8.2,1671.5,70.6,3.53,5.08,0.41,0.32,455,495,0.06,0.73,3.15,2.42,161,2,10,
"Kabanov et al., 2015, GSC OF7948",well,Little Bear N-09,300N096500126300,96E,64.982154,-126.5236909,Imperial,Loon Creek (lower),Core,1672,N09-1672,,67.6,12.6,4.05,1.65,0.74,0.59,2.4,0.58,0.09,0.02,0.011,89,12,9.2,99.54,2684,0.2684,2,13.7,6.3,14.4,2.8,8.6,114.9,2,161,0.6,8.4,7.7,387,1.1,97.8,20.9,27.4,52.1,6.28,23.3,4.6,0.99,4.08,0.6,3.53,0.77,2.09,0.32,2.11,0.31,3.07,1.28,15.4,41.9,8.6,154,63.9,9,1.2,1.1,0.2,0.2,2.3,0.08,1.3,4.1,1672,70.5,2.61,3.99,0.4,0.28,455,495,0.07,0.57,2.64,2.07,151,3,11,
"Kabanov et al., 2015, GSC OF7948",well,Little Bear N-09,300N096500126300,96E,64.982154,-126.5236909,Imperial,Loon Creek (lower),Core,1672.5,N09-1672.5,,66.09,13.54,4.05,1.67,0.68,0.63,2.56,0.6,0.06,0.02,0.012,96,14,9.6,99.48,3065,0.3065,2,13.4,7.2,15,2.9,9,123.1,2,165.7,0.7,8.8,6.9,452,1.2,101.7,19.7,29,53.1,6.22,23.8,4.03,0.83,3.73,0.55,3.32,0.71,2.07,0.32,2.14,0.33,2.93,1.32,14.8,41.5,8.3,232,64.9,8.8,1.6,1.8,0.2,0.2,3,0.08,1.6,4.6,1672.5,70.5,2.46,4.08,0.38,0.28,456,496,0.03,0.56,2.58,2.02,158,1,11,
"Kabanov et al., 2015, GSC OF7948",well,Little Bear N-09,300N096500126300,96E,64.982154,-126.5236909,Imperial,Loon Creek (lower),Core,1673,N09-1673,,67.08,13.16,3.95,1.59,0.95,0.63,2.5,0.6,0.09,0.02,0.012,102,13,8.9,99.49,2600,0.26,2,15.2,7,14.4,2.8,8.7,119.6,1,167.6,0.6,8.2,6.3,681,0.8,104.7,23.9,29.4,53.3,6.22,24.2,4.65,0.94,4.16,0.61,3.52,0.79,2.25,0.32,2.24,0.35,2.64,1.57,14.5,43.3,10.9,276,77.8,14,2.2,2.1,0.2,0.3,2,0.07,1.6,7.2,1673,70.2,2.24,3.61,0.38,0.34,452,492,0.04,0.51,2.21,1.7,163,2,15,
"Kabanov et al., 2015, GSC OF7948",well,Little Bear N-09,300N096500126300,96E,64.982154,-126.5236909,Imperial,Loon Creek (lower),Core,1673.5,N09-1673.5,,64.09,13.33,5.13,1.87,0.73,0.61,2.53,0.62,0.09,0.03,0.012,94,13,10.5,99.53,2623,0.2623,2,14.4,7,14.1,2.8,9.3,119.1,2,166.3,0.7,9.3,6.9,407,1,104.9,23.1,31.2,55.8,6.45,23.8,4.9,1.02,4.19,0.62,3.8,0.79,2.34,0.34,2.25,0.34,3.07,1.5,13.4,42.9,9.8,182,61.8,10.4,1.4,1.7,0.2,0.2,1.2,0.07,1.3,4.5,1673.5,70.1,2.39,3.66,0.39,0.29,455,495,0.03,0.52,2.44,1.92,150,1,12,
"Kabanov et al., 2015, GSC OF7948",well,Little Bear N-09,300N096500126300,96E,64.982154,-126.5236909,Imperial,Mirror Lake,Core,1674,N09-1674,,64.63,13.51,4.68,1.84,0.84,0.65,2.55,0.63,0.09,0.02,0.012,98,14,10.1,99.58,2314,0.2314,1,13.7,7.5,15.5,3,9.6,119.9,2,174,0.7,9.2,8.3,386,1.1,106.8,22.7,30.8,56.7,6.69,25.3,4.95,0.93,4.32,0.66,3.84,0.8,2.18,0.34,2.3,0.35,3.04,1.46,13.5,43.9,11.6,162,75.9,13,1.1,1.7,0.2,0.2,1.4,0.08,1.1,3.4,1674,69.9,1.85,3.48,0.35,0.29,457,497,0.13,0.46,2.49,2.03,140,5,12,
"Kabanov et al., 2015, GSC OF7948",well,Little Bear N-09,300N096500126300,96E,64.982154,-126.5236909,Imperial,Mirror Lake,Core,1674.5,N09-1674.5,,60.79,16.5,5.54,1.98,0.43,0.71,3.08,0.69,0.1,0.03,0.014,87,17,9.7,99.54,2522,0.2522,1,17.1,9.6,19.2,3.4,9.6,155.4,2,166.5,0.7,9.3,4.5,451,0.7,110.2,22.6,32.5,60.5,7.1,26.6,4.97,1.05,4.36,0.65,4.07,0.76,2.37,0.34,2.15,0.37,1.74,1.43,6.8,33.9,12.8,209,79.3,13.5,1.3,1.6,0.2,0.2,<0.5,0.07,1.3,3.4,1674.5,70.5,1.26,1.98,0.39,0.28,448,488,0.01,0.28,1.26,0.98,157,1,22,
"Kabanov et al., 2015, GSC OF7948",well,Little Bear N-09,300N096500126300,96E,64.982154,-126.5236909,Imperial,Mirror Lake,Core,1675,N09-1675,,58.97,17.13,6.12,2.02,0.38,0.73,3.12,0.67,0.09,0.03,0.014,104,17,10.3,99.55,2376,0.2376,3,18.3,9.2,19.7,2.9,9.5,156.2,2,164.1,0.6,10.1,4.1,438,1.1,106.1,22.5,32.3,59.3,7,26.4,4.8,0.94,4.17,0.61,3.77,0.72,2.34,0.36,2.3,0.37,1.74,1.74,9.2,33.7,17.5,242,97.6,22.4,1.5,2.9,0.2,0.3,5.5,0.08,1.4,4,1675,69.9,0.79,1.42,0.36,0.26,446,486,0.01,0.2,1.14,0.94,125,1,23,
"Kabanov et al., 2015, GSC OF7948",well,Little Bear N-09,300N096500126300,96E,64.982154,-126.5236909,Imperial,Mirror Lake,Core,1675.5,N09-1675.5,,63.42,15.11,4.68,1.74,0.56,0.65,2.83,0.67,0.1,0.02,0.013,100,15,9.7,99.53,2353,0.2353,2,16.3,9.1,16.6,3.1,9.5,138.8,2,165.8,0.6,9.6,5.8,548,0.9,110.2,23.9,32,55.9,6.83,26.7,4.63,0.95,4.18,0.61,3.94,0.84,2.46,0.36,2.44,0.37,2.29,1.57,10.9,44.9,10.7,330,75,10.8,2.3,1.8,0.2,0.4,2.6,0.07,1.4,4.6,1675.5,70.3,2.28,3.12,0.42,0.29,452,492,0.03,0.46,2.01,1.55,155,1,14,
"Kabanov et al., 2015, GSC OF7948",well,Little Bear N-09,300N096500126300,96E,64.982154,-126.5236909,Imperial,Mirror Lake,Core,1676,N09-1676,,64.23,13.46,5.38,1.78,0.63,0.63,2.49,0.61,0.07,0.02,0.012,106,14,10.2,99.56,2429,0.2429,8,18.3,7.3,14.9,2.7,9,119.1,2,156.7,0.5,8.5,6.6,305,1.3,102.4,20.1,29,52.8,6.44,24.8,4.26,0.89,3.82,0.59,3.46,0.72,2.22,0.34,2.07,0.33,2.85,1.89,12.7,44.6,15.1,309,88.3,17.4,2.2,2.2,0.2,0.3,0.6,0.09,1.5,5,1676,70.4,2.03,3.36,0.38,0.28,453,493,0.03,0.46,2.29,1.83,147,1,12,
"Kabanov et al., 2015, GSC OF7948",well,Little Bear N-09,300N096500126300,96E,64.982154,-126.5236909,Imperial,Mirror Lake,Core,1676.5,N09-1676.5,,60.33,15.27,5.84,2.05,0.75,0.71,2.85,0.67,0.09,0.03,0.014,112,16,10.9,99.52,2722,0.2722,<1,16.2,8.3,16.2,3.1,9.6,133.7,2,162.7,0.6,9.5,6.1,335,1.2,107.9,21.1,31.8,59.1,6.64,25.7,4.79,1.02,3.96,0.61,3.6,0.75,2.21,0.32,2.16,0.37,2.9,1.77,15.2,41.4,12.3,229,75.6,10.7,1.2,2.2,0.2,0.2,4.2,0.07,1.9,4.3,1676.5,70.1,2.03,3.73,0.35,0.35,454,494,0.04,0.5,2.31,1.81,161,2,15,
"Kabanov et al., 2015, GSC OF7948",well,Little Bear N-09,300N096500126300,96E,64.982154,-126.5236909,Imperial,Mirror Lake,Core,1677,N09-1677,,57.07,18.06,6.4,2.32,0.41,0.71,3.34,0.6,0.07,0.04,0.015,96,17,10.5,99.52,2789,0.2789,<1,19.5,10.7,21.3,2.6,8.3,171,3,161.3,0.6,8.8,3.5,349,0.8,91.5,18,29.1,53.3,6.38,24.2,4.36,0.89,3.62,0.55,3.45,0.66,1.85,0.3,2.01,0.32,1.71,1.18,7,32.1,16.8,218,79.6,23.5,1,1.4,0.2,0.2,1,0.06,1,3.7,1677,70.3,0.89,1.61,0.36,0.33,449,489,0.02,0.22,0.93,0.71,173,2,35,
"Kabanov et al., 2015, GSC OF7948",well,Little Bear N-09,300N096500126300,96E,64.982154,-126.5236909,Imperial,Mirror Lake,Core,1677.5,N09-1677.5,,58.49,17.37,5.95,2.15,0.49,0.72,3.17,0.71,0.1,0.04,0.015,82,17,10.3,99.54,2487,0.2487,2,17.1,9.5,19.3,3.1,9.5,157.4,2,167.5,0.7,10,3.9,435,1.4,113.7,22.7,34.7,63,7.3,26.7,4.89,0.98,4.46,0.67,3.82,0.8,2.34,0.37,2.39,0.38,1.87,1.21,7.7,36.1,10.4,242,61,7.8,1.4,1.2,0.3,0.2,1.2,0.04,1.1,3.5,1677.5,69.8,0.97,1.75,0.36,0.31,451,491,0.03,0.24,1.22,0.98,143,2,25,
"Kabanov et al., 2015, GSC OF7948",well,Little Bear N-09,300N096500126300,96E,64.982154,-126.5236909,Imperial,Mirror Lake,Core,1678,N09-1678,,58.65,18.06,5.49,2.06,0.5,0.75,3.3,0.7,0.08,0.03,0.014,80,18,9.9,99.53,2630,0.263,6,19,10.4,20.4,3.2,9.6,165.7,3,172.1,0.7,10.1,3.6,382,1.1,112.4,22.7,33.3,62.8,7.33,27,4.89,1,4.38,0.63,3.8,0.81,2.38,0.35,2.3,0.36,1.57,1.18,6,31.3,12.3,201,64.6,8.2,0.9,1.1,0.2,0.2,1.7,0.05,1.1,2.9,1678,70.4,0.76,1.55,0.33,0.35,448,488,0.03,0.21,0.97,0.76,160,3,36,
"Kabanov et al., 2015, GSC OF7948",well,Little Bear N-09,300N096500126300,96E,64.982154,-126.5236909,Imperial,Mirror Lake,Core,1678.5,N09-1678.5,,58.96,16.94,6.13,2.09,0.45,0.71,3.12,0.72,0.09,0.04,0.014,83,17,10.2,99.49,2778,0.2778,3,17.3,9.3,18.7,3.2,9.9,152.7,3,161.6,0.6,10.1,4.3,416,1.4,114.8,23.2,33.5,61.4,7.13,27,5.03,1.02,4.34,0.62,3.77,0.76,2.23,0.34,2.24,0.35,1.86,1.42,8.1,35.5,11.2,312,64.6,9.2,1.6,1,0.2,0.2,<0.5,0.06,1.1,4.2,1678.5,70.2,1.34,2.29,0.37,0.33,451,491,0.02,0.32,1.29,0.97,178,2,26,
"Kabanov et al., 2015, GSC OF7948",well,Little Bear N-09,300N096500126300,96E,64.982154,-126.5236909,Imperial,Mirror Lake,Core,1679,N09-1679,,59.17,16.82,6.19,2.18,0.31,0.71,3.09,0.69,0.08,0.04,0.013,82,17,10.2,99.53,2861,0.2861,1,16.6,9.6,19.6,2.9,9.2,153,2,164.5,0.6,9.7,4.2,236,1.3,107.8,21,33.4,59.9,6.88,27,4.88,0.89,4.04,0.59,3.53,0.75,2.3,0.34,2.31,0.35,1.97,1.06,7.1,33.9,14.2,149,65.9,12.7,0.5,0.8,0.2,0.1,1.3,0.09,0.8,2.3,1679,70.7,1.26,2.6,0.33,0.37,445,485,0.04,0.34,1.27,0.93,205,3,29,
"Kabanov et al., 2015, GSC OF7948",well,Little Bear N-09,300N096500126300,96E,64.982154,-126.5236909,Imperial,Mirror Lake,Core,1679.5,N09-1679.5,,60.67,16.42,5.39,2.03,0.41,0.7,3.07,0.7,0.09,0.03,0.014,98,17,10,99.53,2818,0.2818,6,16.8,9.6,18,2.9,10.1,149,3,170.3,0.7,10.4,6.2,251,1,112.9,22.5,33.8,61.6,7.04,27.3,5.08,1.06,4.16,0.62,3.8,0.81,2.36,0.35,2.27,0.38,2.39,1.06,12.7,39.5,12.3,120,66.6,9.8,0.4,0.9,0.2,0.2,1.9,0.06,1.1,2,1679.5,70.5,1.8,3.41,0.35,0.38,453,493,0.03,0.45,1.99,1.54,171,2,19,
"Kabanov et al., 2015, GSC OF7948",well,Little Bear N-09,300N096500126300,96E,64.982154,-126.5236909,Imperial,Mirror Lake,Core,1680,N09-1680,,60.16,17.52,4.93,2.07,0.57,0.72,3.31,0.69,0.08,0.03,0.014,81,17,9.5,99.56,2393,0.2393,2,14.6,10.3,19.4,2.7,9.8,157.5,2,164.6,0.7,9.4,4.3,390,0.9,107.2,19.5,34.2,58,6.88,27.7,4.84,0.92,4.15,0.58,3.34,0.72,2.04,0.32,2.32,0.35,1.74,0.87,7.9,33.7,9.7,179,58.1,6.8,0.9,0.7,0.2,0.2,1.4,0.04,0.9,2.8,1680,70.1,1.11,1.78,0.38,0.29,451,491,0.01,0.25,1.25,1,142,1,23,
"Kabanov et al., 2015, GSC OF7948",well,Little Bear N-09,300N096500126300,96E,64.982154,-126.5236909,Imperial,Mirror Lake,Core,1680.5,N09-1680.5,,57.73,17.55,6.29,2.26,0.39,0.67,3.27,0.64,0.08,0.04,0.015,76,17,10.5,99.45,3322,0.3322,2,16.5,10.1,19.4,2.9,8.6,161.4,2,167.4,0.6,9,3.6,374,1.5,98.4,20.4,29.1,58.5,6.64,25.8,4.32,0.97,3.82,0.56,3.48,0.66,1.97,0.34,2.14,0.34,1.91,1.03,6.6,34.1,11.5,295,59.7,8.1,1.2,0.8,0.2,0.1,<0.5,0.05,1,2.7,1680.5,70.4,1.69,2.85,0.37,0.41,442,482,0.04,0.4,1.27,0.87,224,3,32,
"Kabanov et al., 2015, GSC OF7948",well,Little Bear N-09,300N096500126300,96E,64.982154,-126.5236909,Imperial,Mirror Lake,Core,1681,N09-1681,,62.26,17.21,3.96,1.59,0.33,0.75,3.08,0.71,0.1,0.02,0.013,93,16,9.4,99.39,3625,0.3625,4,15,9.4,18.4,3.1,9.6,147.9,2,168.1,0.9,10.8,5.8,492,1.1,118.7,24.1,32.5,60,6.99,27.9,4.88,1.09,4.69,0.7,3.95,0.84,2.48,0.38,2.38,0.39,2.13,1.21,13.6,40.1,11.4,348,68.3,9,2.3,1.1,0.2,0.2,<0.5,0.07,1,4.8,1681,70.7,1.88,3.29,0.36,0.37,452,492,0.03,0.44,1.88,1.44,175,2,20,
"Kabanov et al., 2015, GSC OF7948",well,Little Bear N-09,300N096500126300,96E,64.982154,-126.5236909,Imperial,Mirror Lake,Core,1681.5,N09-1681.5,,58.43,17.28,5.85,2.12,0.39,0.74,2.98,0.7,0.08,0.03,0.014,76,17,10.6,99.22,5684,0.5684,2,15.2,9.6,17.8,2.9,9.6,141.9,3,183.4,0.7,9.6,5.2,239,1.3,110.1,20.5,32.4,57.9,6.55,23.9,4.64,0.85,3.84,0.56,3.59,0.74,2.23,0.31,2.37,0.33,2.39,1.06,9.1,43.8,9.9,135,54.9,9.1,0.6,0.6,0.2,0.1,0.8,0.06,0.8,1.7,1681.5,70.3,1.57,2.98,0.35,0.37,451,491,0.05,0.4,1.54,1.14,194,3,24,
"Kabanov et al., 2015, GSC OF7948",well,Little Bear N-09,300N096500126300,96E,64.982154,-126.5236909,Imperial,Mirror Lake,Core,1682,N09-1682,,59.48,16.96,5.53,2.03,0.34,0.72,3.19,0.71,0.08,0.03,0.014,108,17,10.4,99.54,2657,0.2657,5,17.3,9.7,18.7,3.3,10.1,155.6,2,170.3,0.7,10.4,7.2,236,1.2,109.9,21.8,32.5,59.4,6.98,26.9,4.91,0.95,4.22,0.62,3.48,0.75,2.39,0.32,2.25,0.35,2.34,1.03,11.9,37.8,11.1,228,72.2,10.8,0.6,0.5,0.2,0.2,1.5,0.06,0.7,1.7,1682,70,2.24,3.41,0.4,0.42,452,492,0.03,0.49,1.89,1.4,180,2,22,
"Kabanov et al., 2015, GSC OF7948",well,Little Bear N-09,300N096500126300,96E,64.982154,-126.5236909,Imperial,Mirror Lake,Core,1682.5,N09-1682.5,,57.36,17.56,6.25,2.22,0.45,0.68,3.26,0.67,0.08,0.04,0.015,78,17,10.8,99.44,3776,0.3776,1,15.2,8.9,19.7,3,8.8,154.8,2,158.5,0.7,8.7,5.8,229,1.2,93.7,18.2,29.1,54.6,6.63,23.6,4.47,0.92,3.71,0.6,3.37,0.7,2.05,0.3,2.06,0.34,2.28,1.05,9.2,35,13.6,147,62.7,11.3,0.5,0.6,0.2,0.1,2.5,0.07,0.7,2.6,1682.5,70.4,1.45,2.63,0.36,0.37,453,493,0.03,0.36,1.46,1.1,180,2,25,
"Kabanov et al., 2015, GSC OF7948",well,Little Bear N-09,300N096500126300,96E,64.982154,-126.5236909,Imperial,Mirror Lake,Core,1683,N09-1683,,60.45,17.7,4.87,1.84,0.26,0.77,3.21,0.69,0.08,0.03,0.014,85,18,9.7,99.6,2403,0.2403,2,15.1,9.5,18.5,2.8,9,151.3,3,152.8,0.6,9.1,5.3,232,1.1,102.4,20,29.7,56.8,6.6,24.1,4.39,0.95,3.92,0.58,3.43,0.71,2.02,0.32,2.07,0.34,1.84,1.03,9,32,12.6,168,61.6,11,0.4,0.4,0.2,0.1,<0.5,0.06,0.7,1.6,1683,70.7,2.05,2.75,0.43,0.4,454,494,0.03,0.42,1.46,1.04,188,2,27,
"Kabanov et al., 2015, GSC OF7948",well,Little Bear N-09,300N096500126300,96E,64.982154,-126.5236909,Imperial,Mirror Lake,Core,1683.5,N09-1683.5,,52.37,16.68,9.38,2.71,0.8,0.73,2.99,0.7,0.09,0.04,0.012,160,17,13,99.52,2864,0.2864,<1,42.5,8.3,17,2.7,8.6,136.2,2,170.3,0.6,11.3,4.9,219,1.3,88.2,17.9,29.1,52.6,6.24,23.5,4.09,0.95,3.66,0.54,3.19,0.63,1.81,0.27,1.74,0.3,2.44,2.86,25,57.8,37.2,152,149.8,25.4,0.4,1.3,0.2,0.3,1.2,0.14,1.1,4.3,1683.5,70.4,1.68,2.76,0.38,0.42,440,480,0.03,0.39,1.45,1.06,190,2,29,
"Kabanov et al., 2015, GSC OF7948",well,Little Bear N-09,300N096500126300,96E,64.982154,-126.5236909,Imperial,Mirror Lake,Core,1684,N09-1684,,57.66,16.59,6.34,2.33,0.87,0.73,3.04,0.67,0.08,0.04,0.014,79,17,11.1,99.49,3278,0.3278,2,15.6,8.9,17.8,2.8,9.2,149.9,3,158.2,0.5,8.8,5.1,219,1.1,97,19.5,29.1,55.6,6.63,23.5,4.32,0.84,3.71,0.58,3.5,0.68,2.09,0.32,1.97,0.31,2.5,1.08,10,36.2,9.8,120,57.2,9.5,0.3,0.6,0.2,0.1,0.8,0.05,0.8,1.2,1684,70.1,2.2,3.03,0.42,0.44,451,491,0.04,0.46,1.6,1.14,189,2,28,
"Kabanov et al., 2015, GSC OF7948",well,Little Bear N-09,300N096500126300,96E,64.982154,-126.5236909,Imperial,Mirror Lake,Core,1684.5,N09-1684.5,,61.21,15.84,5.49,1.92,0.39,0.7,2.91,0.7,0.11,0.03,0.013,86,16,10.2,99.55,2404,0.2404,<1,15.1,8.6,16.9,3,9.1,139.3,2,154.8,0.7,9.6,4.8,420,1.4,106.7,21.9,29.9,55.6,6.71,25.9,4.45,0.97,3.91,0.62,3.39,0.73,2.23,0.32,2.2,0.34,2.21,1.16,11.3,33.2,11.1,244,64.5,8.8,1.5,1.1,0.2,0.2,1.2,0.05,0.9,3.1,1684.5,70.7,1.69,2.67,0.39,0.41,453,493,0.02,0.38,1.61,1.23,166,1,25,
"Kabanov et al., 2015, GSC OF7948",well,Little Bear N-09,300N096500126300,96E,64.982154,-126.5236909,Imperial,Mirror Lake,Core,1685,N09-1685,,55.72,15.78,8.37,2.19,0.67,0.66,2.95,0.69,0.09,0.04,0.013,104,16,12.3,99.49,2837,0.2837,2,22.7,7.9,18,2.9,8.7,144.2,3,158.5,0.6,8.6,4.5,386,1.4,101,21,28.8,53.6,6.66,23.9,4.39,0.88,3.81,0.62,3.38,0.74,2.12,0.34,2.19,0.34,2.96,2.86,8.5,40.2,16.3,329,82.3,17.9,1.6,1.6,0.2,0.3,0.8,0.07,0.9,4.8,1685,70.2,2.04,3.27,0.38,0.42,449,489,0.04,0.46,2.06,1.6,159,2,20,
"Kabanov et al., 2015, GSC OF7948",well,Little Bear N-09,300N096500126300,96E,64.982154,-126.5236909,Imperial,Mirror Lake,Core,1685.5,N09-1685.5,,56.89,18.25,6.14,2.14,0.28,0.68,3.32,0.64,0.05,0.03,0.013,75,18,11,99.47,3444,0.3444,<1,15.9,9.5,19.1,3,8.7,166.7,2,169.3,0.7,9.1,3.9,231,1.1,94.1,16.7,28.5,51.3,6.39,22.8,4.05,0.73,3.19,0.49,3.05,0.72,1.81,0.29,2.07,0.31,1.88,1.11,7.2,35.1,14.3,149,59.5,12.2,0.5,0.8,0.2,0.1,<0.5,0.05,0.9,1.6,1685.5,70.4,1.05,2.07,0.34,0.39,451,491,0.04,0.28,1.15,0.87,180,3,34,
"Kabanov et al., 2015, GSC OF7948",well,Little Bear N-09,300N096500126300,96E,64.982154,-126.5236909,Imperial,Mirror Lake,Core,1686,N09-1686,,54.28,17.1,6.84,2.72,1.66,0.66,3.1,0.64,0.06,0.05,0.013,60,16,12.3,99.4,4022,0.4022,2,14.8,9.8,19.8,2.9,9.3,157.4,3,179.1,0.6,9.6,3.6,173,1.3,100.4,19.5,29.6,54.8,6.58,23.6,4.37,1,3.85,0.55,3.05,0.71,2.23,0.34,2.18,0.29,2.71,1.05,6.4,32.8,10.4,129,50,10.2,0.3,0.8,0.2,<0.1,2,0.06,0.8,1.6,1686,70.9,1.62,3.18,0.34,0.44,443,483,0.05,0.42,1.42,1,224,4,31,
"Kabanov et al., 2015, GSC OF7948",well,Little Bear N-09,300N096500126300,96E,64.982154,-126.5236909,Imperial,Mirror Lake,Core,1686.5,N09-1686.5,,63.26,16.81,3.54,1.44,0.39,0.74,3.08,0.77,0.09,0.01,0.015,89,16,9.3,99.45,3265,0.3265,2,15.8,8.7,18.5,3.1,10.1,145.2,2,163.1,0.8,10.4,5.6,523,1.2,116.4,20.2,30.1,57.2,6.76,26.2,4.3,0.88,3.91,0.61,3.41,0.7,2.19,0.35,2.25,0.35,2.17,1.22,13.8,36.5,7.8,284,59.7,8.3,1.5,1.2,0.2,0.2,1.4,0.06,0.9,3.4,1686.5,70.5,1.92,3.26,0.37,0.31,454,494,0.03,0.44,1.93,1.49,169,2,16,
"Kabanov et al., 2015, GSC OF7948",well,Little Bear N-09,300N096500126300,96E,64.982154,-126.5236909,Imperial,Mirror Lake,Core,1687,N09-1687,,57.47,16.45,6.74,2.43,1.07,0.67,2.93,0.67,0.09,0.05,0.014,70,17,10.9,99.55,2464,0.2464,1,15,7.9,18.9,2.9,8.9,142.9,2,160.7,0.6,9.3,4.2,364,1.2,106.7,22.9,30.1,56.3,6.9,25.8,4.89,1.02,4.36,0.68,3.86,0.8,2.4,0.36,2.24,0.37,2.3,1.06,7.3,29.4,11.3,214,51.8,10.8,0.9,1.2,0.2,0.2,1.1,0.05,0.8,3.4,1687,70,0.9,1.74,0.34,0.2,453,493,0.02,0.24,1.11,0.87,157,2,18,
"Kabanov et al., 2015, GSC OF7948",well,Little Bear N-09,300N096500126300,96E,64.982154,-126.5236909,Imperial,Mirror Lake,Core,1687.5,N09-1687.5,,57.01,18.24,6.23,1.95,0.25,0.68,3.22,0.68,0.05,0.03,0.015,85,18,11.2,99.55,2803,0.2803,2,18.6,10.3,21.4,2.6,9.4,162,3,167.7,0.7,9,4,210,0.9,101.2,19.8,30.1,54.4,6.57,25,4.11,0.8,3.84,0.56,3.19,0.62,1.97,0.3,1.86,0.32,1.85,1.6,9.5,35.8,12.8,141,71.7,15.6,0.5,0.6,0.3,0.1,3.3,0.05,0.9,2,1687.5,70.6,1.23,2.78,0.31,0.39,331,371,0.04,0.35,1.19,0.84,234,3,33,
"Kabanov et al., 2015, GSC OF7948",well,Little Bear N-09,300N096500126300,96E,64.982154,-126.5236909,Imperial,Mirror Lake,Core,1688,N09-1688,,59.94,18,4.53,1.8,0.49,0.71,3.3,0.7,0.06,0.02,0.015,81,18,9.9,99.49,3077,0.3077,2,16.5,10.2,21.7,3.2,10.1,166.4,2,178.8,0.8,9.1,4.7,362,1.2,105.3,20.7,30.9,57.9,6.82,24.9,4.63,0.83,3.77,0.56,3.2,0.69,1.96,0.31,2.01,0.32,1.82,1.09,10.5,35.8,10.1,175,59.5,10.3,0.7,0.9,0.2,0.1,1.5,0.06,0.9,2.5,1688,70.7,1.24,2.3,0.35,0.36,453,493,0.05,0.31,1.35,1.04,170,4,27,
"Kabanov et al., 2015, GSC OF7948",well,Little Bear N-09,300N096500126300,96E,64.982154,-126.5236909,Imperial,Mirror Lake,Core,1688.5,N09-1688.5,,56.2,18.35,6.5,2.05,0.27,0.68,3.25,0.66,0.05,0.04,0.014,81,18,11.4,99.46,3519,0.3519,5,19.2,10.4,22.5,2.8,9.2,170.9,2,174.1,0.7,8.8,4.2,247,1.4,98.3,19.2,30.7,55.7,6.53,24,4.21,0.84,3.45,0.52,3.05,0.59,1.91,0.31,2.1,0.33,2.07,1.42,9.6,36.5,12.1,161,64.9,15.3,0.5,0.6,0.2,0.1,1.1,0.06,0.9,1.9,1688.5,70.4,1.01,2.05,0.33,0.36,454,494,0.02,0.27,1.22,0.95,168,2,30,
"Kabanov et al., 2015, GSC OF7948",well,Little Bear N-09,300N096500126300,96E,64.982154,-126.5236909,Imperial,Mirror Lake,Core,1689,N09-1689,,55.35,18.27,6.53,2.29,0.49,0.66,3.28,0.68,0.07,0.04,0.015,85,17,11.9,99.54,2827,0.2827,4,17.2,9.5,22.3,2.9,9.6,165.1,2,170.6,0.6,9,5.2,217,1.2,99.9,19.1,30.1,55.2,6.58,23.2,4.27,0.76,3.45,0.54,3.09,0.65,1.89,0.29,2,0.31,2.52,1.13,11,37.3,10.3,105,62.1,10.9,0.3,0.5,0.2,0.1,1.8,0.07,0.9,1.9,1689,71,1.23,2.62,0.32,0.35,456,496,0.03,0.34,1.54,1.2,170,2,23,
"Kabanov et al., 2015, GSC OF7948",well,Little Bear N-09,300N096500126300,96E,64.982154,-126.5236909,Imperial,Mirror Lake,Core,1689.5,N09-1689.5,,57.57,18.45,5.25,1.91,0.36,0.65,3.45,0.71,0.07,0.03,0.016,83,18,11,99.45,3245,0.3245,2,17.8,11.3,22.4,2.9,10.1,180.2,3,181.3,0.7,9.9,4.7,424,1.4,109.7,23,33.5,61.7,7.4,27.3,4.91,0.88,4.02,0.65,3.62,0.77,2.2,0.31,2.13,0.35,2.1,1.04,9.9,35.5,10.6,274,61.4,11.6,1.3,1,0.2,0.2,1.4,0.05,0.9,3.8,1689.5,70.8,1.5,2.89,0.34,0.39,452,492,0.02,0.38,1.56,1.18,185,1,25,
"Kabanov et al., 2015, GSC OF7948",well,Little Bear N-09,300N096500126300,96E,64.982154,-126.5236909,Imperial,Mirror Lake,Core,1690,N09-1690,,55.85,18.41,6.13,2.16,0.66,0.69,3.32,0.66,0.05,0.03,0.014,83,18,11.4,99.41,3982,0.3982,4,19.4,10.4,23.2,2.8,9.6,172.6,3,194.9,0.7,9.6,5.2,211,1.1,106.7,21.1,32.6,58.7,6.91,25.4,4.3,0.8,3.77,0.58,3.34,0.68,2.07,0.32,2.03,0.32,2.59,1.33,10.5,35.9,11.5,139,68.6,13,0.4,0.5,0.2,<0.1,0.7,0.06,0.8,2,1690,70.3,1.23,2.72,0.31,0.35,458,498,0.03,0.35,1.61,1.26,169,2,22,
"Kabanov et al., 2015, GSC OF7948",well,Little Bear N-09,300N096500126300,96E,64.982154,-126.5236909,Imperial,Mirror Lake,Core,1690.5,N09-1690.5,,58.71,18.89,4.97,1.68,0.26,0.68,3.21,0.69,0.05,0.02,0.014,92,18,10.3,99.47,3453,0.3453,2,20.6,10.8,21.7,2.9,9.7,167.9,2,180.3,0.7,9.5,5.6,244,1.4,108,20.4,32.1,59.4,6.81,25,4.05,0.79,3.52,0.54,3.14,0.6,1.99,0.29,2.15,0.32,2.25,1.45,12.9,39.6,10.6,139,70.6,14.8,0.3,0.4,0.2,0.1,<0.5,0.07,1,2.5,1690.5,70.3,1.81,3.51,0.34,0.33,450,490,0.03,0.46,1.8,1.34,195,2,18,
"Kabanov et al., 2015, GSC OF7948",well,Little Bear N-09,300N096500126300,96E,64.982154,-126.5236909,Imperial,Mirror Lake,Core,1691,N09-1691,,56.77,19.62,6.14,1.48,0.17,0.67,3.28,0.69,0.05,0.01,0.013,114,17,10.6,99.5,3098,0.3098,4,27.9,10.6,24.3,3,9,172.7,2,185.3,0.7,11.2,5.2,219,1.4,102,17.6,31.2,57.4,6.55,25.9,4.36,0.74,3.6,0.51,2.81,0.63,1.87,0.3,1.79,0.28,1.46,3.2,13.7,39,14.9,218,92.7,17.4,0.5,0.7,0.2,0.1,0.9,0.09,1,2.4,1691,70.3,0.88,1.51,0.37,0.18,448,488,0.01,0.21,1.16,0.95,130,1,16,
"Kabanov et al., 2015, GSC OF7948",well,Little Bear N-09,300N096500126300,96E,64.982154,-126.5236909,Imperial,Mirror Lake,Core,1691.5,N09-1691.5,,55.36,17.49,7.6,2.39,0.3,0.64,3.17,0.61,0.06,0.05,0.013,84,17,11.9,99.56,2679,0.2679,4,17.9,10.5,21.8,2.6,9.2,166.2,2,173.9,0.6,8.4,5.4,220,1.9,94.7,20.9,31.5,56.1,6.66,24.3,4.57,0.81,3.69,0.56,3.4,0.7,2,0.3,2.09,0.32,2.76,1.27,11.2,34.5,10,154,65.1,11.9,0.4,0.7,0.2,0.1,1.8,0.08,1.4,1.8,1691.5,70.4,1.58,2.77,0.36,0.21,458,498,0.01,0.38,1.53,1.15,181,1,14,
"Kabanov et al., 2015, GSC OF7948",well,Little Bear N-09,300N096500126300,96E,64.982154,-126.5236909,Imperial,Mirror Lake,Core,1692,N09-1692,,54.91,17.22,6.74,2.62,1.57,0.64,3.14,0.61,0.06,0.05,0.014,82,16,12,99.57,2478,0.2478,4,18.7,10.2,22.7,2.5,8.8,165.6,2,173.9,0.6,8.5,5.7,227,1,93,17.6,29.1,52.7,6.01,21.8,4.2,0.66,3.21,0.49,2.91,0.59,1.78,0.28,1.81,0.31,3.01,1.26,10.9,37,10.7,143,60.9,12.1,0.4,0.5,0.2,0.1,1.1,0.06,0.9,1.9,1692,70.2,1.84,2.58,0.42,0.31,460,500,0.02,0.39,1.59,1.2,162,1,19,
"Kabanov et al., 2015, GSC OF7948",well,Little Bear N-09,300N096500126300,96E,64.982154,-126.5236909,Imperial,Mirror Lake,Core,1692.5,N09-1692.5,,61.81,17.79,3.78,1.39,0.28,0.7,3.32,0.69,0.08,0.01,0.014,93,18,9.7,99.53,2558,0.2558,4,18.1,10.7,21.8,2.9,9.9,175.6,3,172,0.8,9.4,6.5,495,0.9,110.9,21.9,34.4,59.6,7.35,28.1,4.7,0.94,4.23,0.62,3.61,0.72,2.14,0.35,2.24,0.34,2.18,1.47,15.7,36.5,12,243,79.1,16.3,1.2,0.9,0.2,0.2,<0.5,0.07,1.1,3.8,1692.5,70.9,1.55,2.78,0.36,0.33,460,500,0.02,0.37,1.79,1.42,155,1,18,
"Kabanov et al., 2015, GSC OF7948",well,Little Bear N-09,300N096500126300,96E,64.982154,-126.5236909,Imperial,Mirror Lake,Core,1693,N09-1693,,57.76,18.4,4.92,1.76,0.42,0.64,3.39,0.68,0.08,0.02,0.015,101,18,11.4,99.51,2787,0.2787,5,17,11.2,22.6,2.9,9.6,178.7,3,176.1,0.6,9.7,8,334,0.9,107.3,23.9,36.3,60.5,7.17,26.8,4.98,0.92,4.39,0.66,3.7,0.77,2.23,0.33,2.21,0.35,2.81,1.45,17.8,40.8,11.3,215,74.4,14.3,1,0.5,0.2,0.2,<0.5,0.07,1.2,3.3,1693,70.5,1.74,3.37,0.34,0.24,461,501,0.03,0.44,2.2,1.76,153,1,11,
"Kabanov et al., 2015, GSC OF7948",well,Little Bear N-09,300N096500126300,96E,64.982154,-126.5236909,Imperial,Mirror Lake,Core,1693.5,N09-1693.5,,56.88,18.33,5.97,1.96,0.34,0.63,3.33,0.64,0.07,0.03,0.014,100,18,11.3,99.52,2959,0.2959,2,18.7,11.1,22.8,2.6,9.7,178.3,2,173.6,0.7,9.6,7.3,249,1,99.5,20.5,32.5,58,6.8,24.5,4.44,0.79,3.78,0.55,3.29,0.68,2.1,0.32,2.06,0.34,2.81,1.59,17.8,42,12.5,152,82,16.3,0.4,0.3,0.2,0.2,<0.5,0.1,1.3,3.3,1693.5,70.9,2.12,3.37,0.39,0.29,458,498,0.03,0.48,2.12,1.64,159,1,14,
"Kabanov et al., 2015, GSC OF7948",well,Little Bear N-09,300N096500126300,96E,64.982154,-126.5236909,Imperial,Mirror Lake,Core,1694,N09-1694,,55.41,17.9,6.69,2.17,0.31,0.63,3.23,0.63,0.08,0.04,0.014,112,18,12.2,99.37,3457,0.3457,1,17.4,11,22.9,2.8,8.9,173.5,3,181,0.6,9,12,300,1.4,98.2,22.6,33,58.7,7.19,28,5.01,0.95,4.44,0.66,3.59,0.74,2.09,0.33,2.26,0.35,3.23,1.62,17.2,45.9,12.4,724,80,16.7,2.2,0.6,0.2,0.2,0.6,0.08,1.3,3.7,1694,70.8,2.35,3.96,0.37,0.37,459,499,0.03,0.55,2.47,1.92,160,1,15,
"Kabanov et al., 2015, GSC OF7948",well,Little Bear N-09,300N096500126300,96E,64.982154,-126.5236909,Imperial,Mirror Lake,Core,1694.5,N09-1694.5,,45.98,14.49,9.53,3.67,2.85,0.52,2.7,0.51,0.08,0.06,0.013,106,16,14.4,94.85,44288,4.4288,<1,16.5,8.4,16.8,2.1,7.6,134.5,2,360.5,0.5,7.4,11.3,262,1.1,82.8,28.4,30.2,51.9,6.31,24.1,4.42,0.4,4.54,0.68,4.01,0.81,2.37,0.35,2.35,0.38,4.68,2.69,22.6,41.1,11.8,142,83.8,17.1,0.8,0.9,0.2,0.2,<0.5,0.08,1.6,3.7,1694.5,70.3,1.53,3,0.34,0.35,461,501,0.03,0.41,2.1,1.69,143,1,17,
"Kabanov et al., 2015, GSC OF7948",well,Little Bear N-09,300N096500126300,96E,64.982154,-126.5236909,Imperial,Mirror Lake,Core,1695,N09-1695,,61.99,17.05,3.86,1.25,0.23,0.7,3.12,0.62,0.08,<0.01,0.014,124,17,10.5,99.49,2934,0.2934,3,18.4,10.8,21.4,3,8.8,161.6,2,158.9,0.7,8.8,12.3,474,0.8,107.5,23.3,32.5,56.8,6.94,25.7,4.88,0.92,4.1,0.63,3.76,0.81,2.3,0.33,2.15,0.37,3.31,1.9,28,51.3,13,256,92.9,21.8,1.3,0.9,0.2,0.2,0.8,0.1,1.5,6,1695,70.4,2.62,4.77,0.35,0.32,460,500,0.04,0.63,2.93,2.3,163,1,11,
"Kabanov et al., 2015, GSC OF7948",well,Little Bear N-09,300N096500126300,96E,64.982154,-126.5236909,Imperial,Mirror Lake,Core,1695.5,N09-1695.5,,63.11,14.97,3.44,1.18,0.37,0.61,2.77,0.59,0.09,<0.01,0.013,131,14,10.8,97.95,16215,1.6215,4,16.9,9.6,18.2,2.7,8.7,141.4,2,207.3,0.6,8,12,683,1.1,103.4,27.5,31.5,51.6,6.74,26.2,4.79,0.82,4.67,0.71,4.08,0.84,2.42,0.37,2.37,0.37,3.83,2.13,28.9,49.7,11.9,464,92.9,20.5,2.2,1.9,0.2,0.3,<0.5,0.11,1.6,7.8,1695.5,70.2,3.55,6.22,0.36,0.24,458,498,0.14,0.83,3.53,2.7,176,4,7,
"Kabanov et al., 2015, GSC OF7948",well,Little Bear N-09,300N096500126300,96E,64.982154,-126.5236909,Imperial,Mirror Lake,Core,1696,N09-1696,,62.79,16.05,3.94,1.32,0.3,0.65,2.92,0.59,0.07,0.01,0.013,123,15,10.9,99.51,2686,0.2686,1,17.1,9.1,18.9,2.6,8.5,153.4,2,153.5,0.5,8.4,11.4,452,1.2,98.7,24.1,31.9,53.2,6.33,24.6,4.48,0.82,4.12,0.62,3.75,0.75,2.2,0.35,2.19,0.36,3.42,1.86,31.4,47.5,13.3,343,90.9,23.5,1.4,1.5,0.2,0.2,<0.5,0.1,1.7,6.3,1696,70.4,3.07,5.88,0.34,0.24,456,496,0.04,0.76,3.23,2.47,182,1,7,
"Kabanov et al., 2015, GSC OF7948",well,Little Bear N-09,300N096500126300,96E,64.982154,-126.5236909,Imperial,Mirror Lake,Core,1696.5,N09-1696.5,,65.18,14.29,4.26,1.29,0.25,0.57,2.48,0.51,0.08,0.02,0.012,115,14,10.4,99.41,4012,0.4012,<1,16.1,8.4,16.9,2.2,7.3,133,2,146.8,0.6,7.4,10.8,317,0.8,81.4,22.5,26.9,47.4,5.87,22,4.51,0.88,4.28,0.62,3.56,0.73,1.94,0.3,1.96,0.31,3.42,1.94,24.9,39.6,12.3,160,87,19.1,0.6,1,0.2,0.2,<0.5,0.1,1.8,5.1,1696.5,70.3,2.74,5.12,0.35,0.19,459,499,0.03,0.67,3.01,2.34,170,1,6,
"Kabanov et al., 2015, GSC OF7948",well,Little Bear N-09,300N096500126300,96E,64.982154,-126.5236909,Imperial,Mirror Lake,Core,1697,N09-1697,,64.68,14.73,3.6,1.46,0.85,0.56,2.58,0.53,0.07,0.01,0.012,111,13,10,99.11,6680,0.668,<1,15.1,7.9,18.1,2.3,7.4,136,2,179.7,0.6,7.4,10.1,331,1.2,79.5,17.1,23.5,42.5,5.1,19.3,3.29,0.65,3.15,0.47,2.76,0.58,1.82,0.26,1.7,0.28,3.42,1.75,26.4,47.4,11.5,173,85.8,17,1,1.1,0.2,0.2,0.8,0.09,1.7,3.8,1697,70.2,2.8,5.01,0.36,0.34,459,499,0.05,0.66,3.01,2.35,166,2,11,
"Kabanov et al., 2015, GSC OF7948",well,Little Bear N-09,300N096500126300,96E,64.982154,-126.5236909,Imperial,Mirror Lake,Core,1697.5,N09-1697.5,,66.61,14.02,3.01,1.39,0.81,0.53,2.6,0.52,0.07,0.01,0.012,102,14,9.9,99.5,2940,0.294,3,14.1,7.9,17.3,2.1,7.3,134.6,2,178.7,0.5,7.4,8.5,467,1,80.3,20.6,27.8,47.7,5.87,21.9,4.01,0.82,3.58,0.54,3,0.65,1.99,0.29,1.93,0.3,3.34,1.38,27.6,40.4,10,214,82.8,13.9,1.3,1.2,0.2,0.2,0.5,0.06,1.2,4.5,1697.5,70.6,2.59,4.46,0.37,0.27,462,502,0.04,0.6,2.9,2.3,154,1,9,
"Kabanov et al., 2015, GSC OF7948",well,Little Bear N-09,300N096500126300,96E,64.982154,-126.5236909,Imperial,Mirror Lake,Core,1698,N09-1698,,71.07,12.43,2.57,0.97,0.49,0.53,2.26,0.42,0.1,<0.01,0.01,92,12,8.7,99.6,2313,0.2313,4,13.4,6.6,14.6,1.8,6,114.1,1,147.6,0.4,5.8,8.3,361,0.8,65.1,18.1,21.4,36.9,4.61,17.3,3.15,0.73,3.21,0.48,2.78,0.59,1.64,0.24,1.54,0.25,2.91,1.46,21.6,35.6,9.4,218,76.6,15.5,1,1.4,0.1,0.2,<0.5,0.06,1.7,4,1698,71,3.15,4.79,0.4,0.28,460,500,0.04,0.67,2.83,2.16,169,1,10,
"Kabanov et al., 2015, GSC OF7948",well,Little Bear N-09,300N096500126300,96E,64.982154,-126.5236909,Imperial,Mirror Lake,Core,1698.5,N09-1698.5,,64.58,14.69,3.32,1.6,1.2,0.55,2.68,0.54,0.05,0.02,0.012,127,14,10.3,99.52,2636,0.2636,2,15.8,8.1,18,2.3,7.7,139.3,2,263.7,0.6,7.6,9.8,437,0.8,84.2,21.5,26.3,46.5,5.81,22.1,3.88,0.82,3.46,0.52,3.13,0.69,2.04,0.3,2.05,0.33,3.73,1.72,32.8,41.6,11.3,225,91.5,16.9,1.2,1.2,0.2,0.2,<0.5,0.1,1.7,4.4,1698.5,70.3,2.84,4.68,0.38,0.21,459,499,0.04,0.64,2.91,2.27,161,1,7,
"Kabanov et al., 2015, GSC OF7948",well,Little Bear N-09,300N096500126300,96E,64.982154,-126.5236909,Imperial,Mirror Lake,Core,1699,N09-1699,,69.52,12.73,2.71,1.01,0.41,0.54,2.24,0.46,0.06,<0.01,0.011,114,12,9.8,99.54,2640,0.264,5,14.4,7.1,14.6,2.2,6.4,119.1,1,152.9,0.6,5.5,11.1,515,0.9,74.4,19.4,23.7,38.6,4.97,19.6,3.7,0.73,3.45,0.51,2.99,0.63,1.84,0.27,1.79,0.28,3.58,1.54,25.8,41.6,10.1,247,87.4,17.5,1.6,1.7,0.2,0.3,<0.5,0.1,1.9,5.5,1699,70.5,2.72,5.55,0.33,0.24,461,501,0.04,0.7,3.32,2.62,167,1,7,
"Kabanov et al., 2015, GSC OF7948",well,Little Bear N-09,300N096500126300,96E,64.982154,-126.5236909,Canol,Dodo Canyon,Core,1699.5,N09-1699.5,,42.89,8.07,3.33,8.66,11.72,0.36,1.44,0.37,0.04,0.1,0.007,91,9,22.2,99.21,2712,0.2712,<1,11.4,4.7,8.8,2,5,70.6,<1,1832.9,0.3,4.8,8.7,391,0.8,69.6,20.4,19.3,32.4,4.26,16.3,3.37,0.76,3.74,0.6,3.2,0.67,1.83,0.26,1.66,0.26,7.37,1.97,23.7,30,8.4,268,71.4,13.8,1.7,1.3,0.1,0.2,0.6,0.09,1.6,5.2,1699.5,70.6,1.2,2.38,0.33,0.26,462,502,0.01,0.31,1.87,1.56,127,1,14,
"Kabanov et al., 2015, GSC OF7948",well,Little Bear N-09,300N096500126300,96E,64.982154,-126.5236909,Canol,Dodo Canyon,Core,1700,N09-1700,,72.28,10.88,3.05,0.89,0.43,0.48,1.96,0.49,0.09,<0.01,0.01,148,9,9,99.57,2205,0.2205,6,15.3,5.7,12.3,2.4,7.1,97.5,1,142.6,0.5,6.5,13.2,554,0.8,89.7,22.3,25.6,42.4,5.67,21.2,3.97,0.82,3.57,0.55,3.16,0.67,2.03,0.3,1.95,0.29,3.93,1.96,52.8,49.8,11,235,102.2,16.4,1.8,1.7,0.2,0.3,<0.5,0.12,1.8,6,1700,70.2,3.28,5.84,0.36,0.31,460,500,0.1,0.78,3.83,3.05,152,3,8,
"Kabanov et al., 2015, GSC OF7948",well,Little Bear N-09,300N096500126300,96E,64.982154,-126.5236909,Canol,Dodo Canyon,Core,1700.5,N09-1700.5,,68.44,12.39,3.04,1.24,0.88,0.53,2.23,0.47,0.09,0.01,0.011,120,11,10.2,99.58,2365,0.2365,2,13.6,7,14.1,2.3,7.4,117.9,4,183.6,0.4,6.2,15.3,375,0.8,83,19.2,24,42.6,5.61,21.4,3.94,0.82,3.45,0.5,2.85,0.58,1.75,0.26,1.78,0.27,3.74,1.64,31,39.9,9.5,201,84,15.2,1.1,1.1,0.2,0.2,<0.5,0.11,1.4,5,1700.5,70.4,2.22,4.79,0.32,0.16,464,504,0.04,0.59,3.38,2.79,142,1,5,
"Kabanov et al., 2015, GSC OF7948",well,Little Bear N-09,300N096500126300,96E,64.982154,-126.5236909,Canol,Dodo Canyon,Core,1701,N09-1701,,50.83,11.15,4.83,5.02,7.38,0.55,2.04,0.44,0.05,0.05,0.009,99,13,17.1,99.48,2371,0.2371,<1,13.6,6.5,13.3,2.1,6.2,101.7,1,685.9,0.4,6.1,12.7,231,1,77,29.1,29.2,49,6.35,26,4.52,1.04,4.85,0.72,3.97,0.85,2.57,0.4,2.49,0.39,5.76,2.05,31.7,35.1,9.6,154,81.9,12.8,0.8,1.2,0.1,0.2,<0.5,0.12,2,4.5,1701,70.4,1.7,3.42,0.33,0.33,462,502,0.03,0.44,2.73,2.29,125,1,12,
"Kabanov et al., 2015, GSC OF7948",well,Little Bear N-09,300N096500126300,96E,64.982154,-126.5236909,Canol,Dodo Canyon,Core,1701.5,N09-1701.5,,78.84,6.95,2.05,0.93,0.89,0.38,1.2,0.33,0.09,<0.01,0.008,119,6,7.9,99.55,2419,0.2419,1,10.7,3.6,7.6,1.7,4.8,59.1,<1,146,0.3,4.3,10.5,657,<0.5,65.8,17.6,18.3,28.9,3.76,15.2,2.61,0.6,2.78,0.43,2.62,0.55,1.52,0.24,1.37,0.22,3.79,1.39,38.6,39,7.2,251,91.4,14.9,2.2,2.3,0.1,0.4,<0.5,0.08,1.6,5.8,1701.5,70.7,1.93,3.66,0.35,0.25,465,505,0.02,0.48,3.2,2.72,114,1,8,
"Kabanov et al., 2015, GSC OF7948",well,Little Bear N-09,300N096500126300,96E,64.982154,-126.5236909,Canol,Dodo Canyon,Core,1702,N09-1702,,64.9,8.52,9.98,0.61,0.24,0.48,1.46,0.41,0.06,<0.01,0.008,166,8,12.9,99.62,1978,0.1978,5,16.9,4.2,9.4,2.2,6.2,72.2,<1,99.7,0.4,6,23.9,415,1.1,86.4,22.7,25.1,41.2,5.67,22,4.15,0.91,3.98,0.56,3.27,0.66,1.97,0.3,1.86,0.3,4.93,8,77.2,68.2,13.5,243,124.5,31.9,1.9,4.4,0.2,0.5,<0.5,0.24,1.9,34.1,1702,70.3,3.41,5.2,0.4,0.18,459,499,0.05,0.73,4.6,3.87,113,1,4,
"Kabanov et al., 2015, GSC OF7948",well,Little Bear N-09,300N096500126300,96E,64.982154,-126.5236909,Canol,Dodo Canyon,Core,1702.5,N09-1702.5,,17.82,4.65,3.71,14.13,21.88,0.38,0.88,0.23,0.06,0.17,0.005,28,5,35.4,99.27,2897,0.2897,3,8.8,2.1,5.9,1.2,3.8,37.1,<1,1078.8,0.2,3,5.6,82,0.6,48.2,15,13.7,24.5,2.89,11.3,2.36,0.54,2.59,0.36,2.12,0.48,1.23,0.17,1.18,0.19,11.14,1.79,5,25.4,5,57,22.4,10,0.3,1.2,0.1,0.1,<0.5,0.17,0.4,2.1,1702.5,70.1,1.18,1.85,0.39,0.23,460,500,0.01,0.26,2.12,1.86,87,0,11,
"Kabanov et al., 2015, GSC OF7948",well,Little Bear N-09,300N096500126300,96E,64.982154,-126.5236909,Canol,Dodo Canyon,Core,1702.9,N09-1702.9,,78.71,5.46,1.63,1.28,1.59,0.36,0.89,0.23,0.06,<0.01,0.004,116,5,9.3,99.53,2896,0.2896,3,9.7,2.2,6.2,1.3,3.9,40.4,<1,177.6,0.3,3.2,16.4,432,0.7,45.5,15.6,16,25.2,3.45,14,2.74,0.56,2.82,0.4,2.15,0.5,1.29,0.19,1.22,0.2,5.23,1.19,38.1,36.1,6.9,209,76.3,14.2,1.2,2.3,0.1,0.3,<0.5,0.09,0.6,3.8,1702.9,70.2,3.67,6.88,0.35,0.3,460,500,0.06,0.89,4.88,3.99,141,1,6,
"Kabanov et al., 2015, GSC OF7948",well,Little Bear N-09,300N096500126300,96E,64.982154,-126.5236909,Canol,Dodo Canyon,Core,1703.5,N09-1703.5,,83.64,4.58,1.53,0.4,0.32,0.32,0.73,0.19,0.07,<0.01,0.005,109,4,7.8,99.62,2054,0.2054,<1,7.8,1.9,4.5,0.9,3.2,32.3,<1,70.9,0.2,2.9,16.4,682,<0.5,36.3,12.9,13.1,20.6,3.03,13.2,2.62,0.58,2.38,0.31,1.79,0.35,1.19,0.16,1.01,0.15,4.89,1.22,31.8,35.1,6.3,152,78.5,14,0.9,3.1,<0.1,0.3,1.6,0.08,0.6,4.4,1703.5,70.1,4.38,9.33,0.32,0.22,463,503,0.06,1.16,7.02,5.86,133,1,3,
"Kabanov et al., 2015, GSC OF7948",well,Little Bear N-09,300N096500126300,96E,64.982154,-126.5236909,Canol,Dodo Canyon,Core,1704,N09-1704,,74.54,7.07,5.02,0.48,0.22,0.46,1.19,0.32,0.07,<0.01,0.007,161,7,10.2,99.61,2102,0.2102,3,16.6,3.2,8.4,1.6,5.3,55.8,<1,82.3,0.4,4.8,24.5,558,1,56.2,18.8,19.9,30.9,4.23,16.6,3.09,0.71,3.22,0.43,2.63,0.52,1.68,0.24,1.53,0.24,5.16,3.92,55.6,56.2,14.3,152,114.8,25.6,0.9,5.9,0.2,0.5,<0.5,0.22,2.4,9.1,1704,70.5,3.45,5.36,0.39,0.16,462,502,0.05,0.75,5.17,4.42,104,1,3,
"Kabanov et al., 2015, GSC OF7948",well,Little Bear N-09,300N096500126300,96E,64.982154,-126.5236909,Canol,Dodo Canyon,Core,1704.5,N09-1704.5,,72.88,9.92,3.74,0.65,0.13,0.48,1.71,0.39,0.06,<0.01,0.01,155,10,9.6,99.56,2549,0.2549,2,16.8,5.1,11,1.9,5.7,89.6,1,96.2,0.4,5.6,18.6,432,0.6,66.8,20.1,23.8,37.6,4.84,19.4,3.76,0.71,3.22,0.45,2.65,0.63,1.8,0.28,1.85,0.29,4.3,2.8,58.7,54.7,12.1,247,122,17.6,1.2,2.5,0.2,0.4,0.7,0.23,2.2,6.9,1704.5,70.8,2.79,5.13,0.35,0.13,462,502,0.05,0.67,4.15,3.48,124,1,3,
"Kabanov et al., 2015, GSC OF7948",well,Little Bear N-09,300N096500126300,96E,64.982154,-126.5236909,Canol,Dodo Canyon,Core,1705,N09-1705,,66.33,14.47,4.34,1.02,0.28,0.71,2.33,0.51,0.05,0.03,0.008,84,13,9.5,99.57,2850,0.285,3,15,7.1,15,2.7,6.2,113.1,2,145.3,0.5,8.3,8.8,206,1,78.3,18.8,26.5,44.2,5.39,21.1,3.73,0.76,3.49,0.47,2.83,0.56,1.76,0.26,1.76,0.29,2.74,3.16,24.4,44.9,16.2,116,69.5,20,0.5,1.8,0.2,0.1,0.9,0.2,1.4,3.8,1705,70,2.14,4.21,0.34,0.1,462,502,0.07,0.54,2.54,2,166,3,4,
"Kabanov et al., 2015, GSC OF7948",well,Little Bear N-09,300N096500126300,96E,64.982154,-126.5236909,Canol,Dodo Canyon,Core,1705.5,N09-1705.5,,68.07,13.4,3.95,0.97,0.23,0.63,2.41,0.45,0.06,0.01,0.012,113,13,9.1,99.31,5063,0.5063,3,18.1,6.6,16.2,2,6.4,118.3,2,139.3,0.5,6.1,11.8,296,1.2,71.1,20,24.3,40.1,5.16,18.9,3.56,0.78,3.16,0.48,2.7,0.65,1.92,0.28,1.9,0.29,2.86,2.72,46.6,56.8,14.5,165,99.8,19.4,0.9,2.3,0.3,0.2,<0.5,0.24,2.1,5.5,1705.5,70.2,1.95,3.66,0.35,0.13,463,503,0.03,0.48,2.87,2.39,128,1,5,
"Kabanov et al., 2015, GSC OF7948",well,Little Bear N-09,300N096500126300,96E,64.982154,-126.5236909,Canol,Dodo Canyon,Core,1706,N09-1706,,64.93,13.36,4.66,1.29,0.68,0.63,2.47,0.45,0.06,0.02,0.012,108,14,10.9,99.42,4038,0.4038,3,19.7,7.6,15.6,2,6.7,125.7,2,178.3,0.4,6.4,7.7,225,1.3,73.2,22,25.9,44.2,5.54,22.4,4.22,0.86,3.83,0.56,3.32,0.69,2.04,0.31,2,0.33,3.46,3.36,18.5,49.8,13.8,172,87.2,21,0.7,1.6,0.2,0.2,<0.5,0.27,1.4,4.8,1706,70.6,1.72,3.93,0.3,0.14,465,505,0.03,0.48,3.4,2.92,116,1,4,
"Kabanov et al., 2015, GSC OF7948",well,Little Bear N-09,300N096500126300,96E,64.982154,-126.5236909,Canol,Dodo Canyon,Core,1706.5,N09-1706.5,,74.2,9.38,2.94,0.64,0.14,0.48,1.67,0.36,0.06,<0.01,0.01,162,9,9.6,99.48,2452,0.2452,7,15,5.1,10.8,1.5,5.1,83.6,1,86.4,0.4,4.8,17,893,0.8,60.4,19.2,20,32.3,4.3,17.6,3.1,0.69,2.88,0.45,2.64,0.58,1.77,0.28,1.71,0.27,4.5,2.1,62.8,57.7,11.9,518,137.9,21.4,3.1,3,0.2,0.4,<0.5,0.19,1.6,8,1706.5,70.3,3.26,5.47,0.37,0.1,463,503,0.05,0.74,4.52,3.78,121,1,2,
"Kabanov et al., 2015, GSC OF7948",well,Little Bear N-09,300N096500126300,96E,64.982154,-126.5236909,Canol,Dodo Canyon,Core,1707,N09-1707,,72.21,10.62,3.43,0.77,0.21,0.53,1.84,0.36,0.06,<0.01,0.009,121,10,9.5,99.6,2496,0.2496,4,14.5,5.5,11.7,1.6,5.6,92.5,1,99.8,0.4,5.2,14.3,359,1.2,59.5,18.9,20.3,33,4.33,17,2.86,0.75,3.01,0.43,2.54,0.55,1.7,0.24,1.64,0.27,3.72,2.44,43.4,55.1,15,167,102.9,20.2,0.9,2.1,0.2,0.2,<0.5,0.2,1.5,7.2,1707,70.2,2.74,5.19,0.35,0.12,461,501,0.07,0.67,3.86,3.19,134,2,3,
"Kabanov et al., 2015, GSC OF7948",well,Little Bear N-09,300N096500126300,96E,64.982154,-126.5236909,Canol,Dodo Canyon,Core,1707.5,N09-1707.5,,67.82,10.69,3.96,0.78,0.19,0.52,1.89,0.38,0.06,<0.01,0.009,156,10,11.1,97.43,21587,2.1587,1,13.9,5.6,13,1.7,5.9,92.3,1,194.2,0.4,5.3,21.3,465,1.3,61.2,22.6,22.4,35.8,4.9,19.5,3.55,1.02,3.47,0.49,2.93,0.63,1.9,0.28,1.85,0.3,4.58,3.34,57.5,59.1,14.2,216,121.4,22.1,1.2,2.5,0.3,0.3,<0.5,0.21,1.5,9.3,1707.5,70.1,2.29,5.49,0.29,0.1,463,503,0.05,0.66,4.41,3.75,124,1,2,
"Kabanov et al., 2015, GSC OF7948",well,Little Bear N-09,300N096500126300,96E,64.982154,-126.5236909,Canol,Dodo Canyon,Core,1708,N09-1708,,69.28,10.89,3.82,0.76,0.16,0.46,1.92,0.37,0.08,<0.01,0.011,201,10,11.6,99.4,3295,0.3295,<1,16.7,6.2,12.2,1.7,6.1,97.9,1,108.4,0.3,5.4,25.5,691,0.7,62.2,34.9,24.8,37.9,5.8,23.2,4.6,1.11,5.18,0.76,4.34,0.98,2.71,0.37,2.37,0.39,5.6,2.83,74.9,71.4,13.1,484,163.1,27.2,2.7,2.4,0.3,0.4,<0.5,0.25,1.9,9.3,1708,70.8,2.78,7.61,0.27,0.26,465,505,0.04,0.88,6.08,5.2,125,1,4,
"Kabanov et al., 2015, GSC OF7948",well,Little Bear N-09,300N096500126300,96E,64.982154,-126.5236909,Canol,Dodo Canyon,Core,1708.5,N09-1708.5,,66.6,11.42,4.68,1.37,1.04,0.65,2.1,0.45,0.09,0.02,0.011,108,11,11.1,99.58,2647,0.2647,4,17.2,5.7,13.4,2.2,7,98.9,1,166.4,0.6,6.7,10.7,170,1.2,76.4,22.5,24.1,39.7,5.16,20.5,3.8,0.9,3.68,0.56,3.23,0.72,2,0.32,1.87,0.32,4,3.43,35,55.7,13.8,152,88.4,16.4,0.8,1.2,0.3,0.2,<0.5,0.43,1,6.1,1708.5,70.5,2.26,4.67,0.33,0.22,459,499,0.04,0.59,4.12,3.53,113,1,5,
"Kabanov et al., 2015, GSC OF7948",well,Little Bear N-09,300N096500126300,96E,64.982154,-126.5236909,Canol,Dodo Canyon,Core,1709,N09-1709,,31.1,4.24,2.45,11.66,18.18,0.34,0.76,0.18,0.06,0.16,0.004,25,6,30.2,99.34,2989,0.2989,6,6.9,1.8,4.7,0.9,2.5,32.2,<1,882.5,0.1,2.4,2.8,59,<0.5,36.4,19,15.9,24.9,3.39,13.8,2.89,0.81,3.32,0.46,2.51,0.52,1.47,0.21,1.3,0.22,9.51,1.13,3.5,19.5,4.7,39,19.5,5.7,0.2,0.5,<0.1,<0.1,<0.5,0.09,0.3,1.5,1709,70.3,1.47,2.88,0.34,0.37,458,498,0.04,0.38,2.43,2.05,119,2,15,
"Kabanov et al., 2015, GSC OF7948",well,Little Bear N-09,300N096500126300,96E,64.982154,-126.5236909,Canol,Dodo Canyon,Core,1709.5,N09-1709.5,,37.13,7.46,3.38,9.53,14.4,0.54,1.4,0.32,0.07,0.1,0.007,39,11,25.1,99.4,2855,0.2855,2,9.2,2.7,8.5,1.5,4.9,58.8,<1,712.9,0.4,4.5,4.7,77,0.7,57.8,21.6,23.4,39.2,4.9,19.6,3.87,0.95,3.77,0.56,3.32,0.7,1.99,0.29,1.99,0.31,8.34,2.11,3.3,36,8.8,66,30.8,10.3,0.5,0.7,0.2,<0.1,<0.5,0.16,0.3,2.4,1709.5,70.6,1.44,2.66,0.35,0.39,461,501,0.03,0.36,2.65,2.29,100,1,15,
"Kabanov et al., 2015, GSC OF7948",well,Little Bear N-09,300N096500126300,96E,64.982154,-126.5236909,Canol,Dodo Canyon,Core,1710,N09-1710,,79.6,4.66,2.05,0.79,1.06,0.4,0.73,0.21,0.06,<0.01,0.004,107,4,9.4,99.01,7876,0.7876,2,9,1.6,4.9,1.1,3.4,32.7,<1,126,0.2,3.3,13.5,359,<0.5,36.1,13.2,12.5,19.9,2.82,11.3,2.09,0.5,2.11,0.3,1.83,0.38,1.19,0.17,1.16,0.16,4.98,1.73,33.1,45.1,8.8,165,85.2,13.7,1.1,2.6,<0.1,0.2,<0.5,0.14,0.6,6.6,1710,70.2,4.81,4.75,0.5,0.36,465,505,0.04,0.81,4.72,3.91,101,1,8,
"Kabanov et al., 2015, GSC OF7948",well,Little Bear N-09,300N096500126300,96E,64.982154,-126.5236909,Canol,Dodo Canyon,Core,1710.5,N09-1710.5,,84.57,3.82,1.34,0.45,0.5,0.34,0.57,0.17,0.04,<0.01,0.004,100,3,7.9,99.68,2084,0.2084,3,9.3,1.5,4.9,0.9,2.7,28.8,<1,71.2,0.3,2.1,9.5,335,<0.5,32.1,14.3,13,21.5,2.87,12.1,2.09,0.5,2.16,0.3,1.64,0.31,1.05,0.13,1.06,0.13,4.55,1.09,30.9,38.2,8.5,173,78.5,10.6,1.1,2.4,0.1,0.2,<0.5,0.12,0.7,3.1,1710.5,69.9,3.8,5.63,0.4,0.26,467,507,0.05,0.8,5.43,4.63,104,1,5,
"Kabanov et al., 2015, GSC OF7948",well,Little Bear N-09,300N096500126300,96E,64.982154,-126.5236909,Canol,Dodo Canyon,Core,1711,N09-1711,,82.07,4.91,1.83,0.31,0.17,0.39,0.8,0.22,0.07,<0.01,0.005,129,4,8.9,99.68,2159,0.2159,1,11.3,1.9,4.9,1.1,3.3,36,<1,67.7,0.2,3.5,17.5,206,0.6,40.5,16.2,15.2,25.9,3.55,14.7,2.83,0.64,2.9,0.4,2.23,0.48,1.47,0.2,1.19,0.17,5.35,1.46,57.1,47.9,8.6,180,95,12.3,1.4,1.8,0.1,0.2,<0.5,0.15,0.8,3.3,1711,71,4.9,7.37,0.4,0.29,460,500,0.11,1.04,5.53,4.49,133,2,5,
"Kabanov et al., 2015, GSC OF7948",well,Little Bear N-09,300N096500126300,96E,64.982154,-126.5236909,Canol,Dodo Canyon,Core,1711.5,N09-1711.5,,74.96,8.14,3.58,0.56,0.17,0.41,1.42,0.29,0.08,<0.01,0.006,119,8,10,99.66,2299,0.2299,2,14,4,9.4,1.5,5.1,70.4,<1,82.6,0.3,4.4,24.6,152,1.1,51.9,19.5,18.9,33.5,4.17,16.2,3.12,0.64,3.12,0.42,2.63,0.53,1.57,0.23,1.45,0.24,4.78,2.75,77.6,63.6,13.2,130,105,21.5,0.7,1.1,0.2,0.3,<0.5,0.32,1.1,5.8,1711.5,70.3,3.49,6.17,0.36,0.17,460,500,0.18,0.82,5.06,4.24,122,4,3,
"Kabanov et al., 2015, GSC OF7948",well,Little Bear N-09,300N096500126300,96E,64.982154,-126.5236909,Canol,Dodo Canyon,Core,1712,N09-1712,,78.02,7.13,2.19,0.53,0.19,0.47,1.23,0.26,0.08,<0.01,0.007,129,7,9.5,99.67,2014,0.2014,2,12.3,3.2,8.9,1.4,4.6,63.3,1,76.3,0.4,4.3,16.8,248,<0.5,49.2,17,18,28.1,3.67,14.8,2.45,0.61,2.57,0.39,2.05,0.5,1.59,0.2,1.38,0.24,4.89,1.69,63.9,68.7,10.8,208,102.8,17.4,0.9,1.6,0.2,0.2,<0.5,0.12,0.9,5.7,1712,70.5,3.96,7.11,0.36,0.2,458,498,0.06,0.94,5.15,4.21,138,1,4,
"Kabanov et al., 2015, GSC OF7948",well,Little Bear N-09,300N096500126300,96E,64.982154,-126.5236909,Canol,Dodo Canyon,Core,1712.5,N09-1712.5,,75.65,7.98,2.89,0.58,0.22,0.52,1.38,0.29,0.08,<0.01,0.007,135,7,10,99.64,2313,0.2313,2,15.1,3.5,9.2,1.4,5.4,66.4,<1,83.3,0.3,4.1,19.7,213,0.9,54.4,19.4,19.2,30.3,4.03,16,3.05,0.53,3.08,0.44,2.5,0.57,1.57,0.25,1.57,0.25,5.06,2.22,72.5,60.9,11.9,159,109.3,19.1,0.9,1.7,0.2,0.2,<0.5,0.2,1.2,6.4,1712.5,70.1,3.28,6.18,0.35,0.11,463,503,0.04,0.8,5.12,4.32,121,1,2,
"Kabanov et al., 2015, GSC OF7948",well,Little Bear N-09,300N096500126300,96E,64.982154,-126.5236909,Canol,Dodo Canyon,Core,1713.2,N09-1713.2,,63.98,5.58,1.53,0.71,11.65,0.43,0.9,0.19,0.07,0.02,0.004,83,5,14.3,99.38,4191,0.4191,2,6.6,2.2,6.1,1,2.9,42.7,<1,606.5,0.2,3,12.1,232,<0.5,40.8,22.3,13.1,22.9,3.02,11.7,2.25,0.6,3.1,0.48,2.7,0.55,1.68,0.21,1.4,0.2,5.48,1.14,33.9,33.9,7.1,104,63.3,10.5,0.8,1.3,0.1,0.2,<0.5,0.11,0.7,3,1713.2,70.5,3.44,4.09,0.46,0.24,463,503,0.04,0.64,3.46,2.82,118,1,7,
"Kabanov et al., 2015, GSC OF7948",well,Little Bear N-09,300N096500126300,96E,64.982154,-126.5236909,Canol,Dodo Canyon,Core,1713.5,N09-1713.5,,81.78,5.29,1.68,0.55,0.8,0.36,0.93,0.21,0.04,<0.01,0.006,124,5,8,99.62,2052,0.2052,<1,7.3,2.3,5.7,0.9,3,43.2,<1,86.4,0.2,2.9,8.5,581,0.6,35.2,15.8,12.6,20.2,2.87,11.1,2.13,0.53,2.51,0.37,2.03,0.44,1.3,0.18,1.2,0.18,4.4,1.27,46.3,36,7.7,306,96.4,13.7,2.1,2.6,0.1,0.2,<0.5,0.12,1,4.1,1713.5,71,3.69,5.31,0.41,0.27,462,502,0.05,0.77,4.41,3.64,120,1,6,
"Kabanov et al., 2015, GSC OF7948",well,Little Bear N-09,300N096500126300,96E,64.982154,-126.5236909,Canol,Dodo Canyon,Core,1714,N09-1714,,59.33,12.19,9.72,0.74,0.21,0.71,1.78,0.52,0.06,0.03,0.011,209,9,14.1,99.45,2695,0.2695,6,16.4,5.1,12.3,1.7,7.5,87.1,1,90.5,0.5,9.8,29.9,915,2.9,68.5,19.4,22.8,35.7,4.54,17.5,3.52,0.66,3.05,0.47,2.65,0.53,1.64,0.28,1.72,0.25,4.23,7.67,100.4,83.1,28,265,198.4,52.1,2,7.9,0.3,0.8,1.5,0.36,3.1,34.4,1714,70.2,2.7,4.91,0.35,0.22,461,501,0.05,0.65,4.55,3.9,108,1,5,
"Kabanov et al., 2015, GSC OF7948",well,Little Bear N-09,300N096500126300,96E,64.982154,-126.5236909,Canol,Dodo Canyon,Core,1714.5,N09-1714.5,,70.73,8.91,4.55,0.66,0.33,0.62,1.49,0.38,0.11,0.01,0.01,184,7,11.7,99.51,2673,0.2673,1,14,4.3,11.5,1.7,7.3,72.3,<1,92.6,0.4,5.5,20.5,597,1,70.7,30.2,25.5,39.2,5.58,21.8,4.29,0.83,4.13,0.6,3.77,0.66,2.11,0.31,1.99,0.32,5.03,3.52,79.2,78.5,16.3,332,161.9,34.1,2.1,5.6,0.2,0.6,<0.5,0.33,2.5,16.2,1714.5,70.7,4.28,7.16,0.37,0.22,461,501,0.04,0.96,5.29,4.33,135,1,4,
"Kabanov et al., 2015, GSC OF7948",well,Little Bear N-09,300N096500126300,96E,64.982154,-126.5236909,Canol,Dodo Canyon,Core,1715,N09-1715,,66.16,9.3,3.89,2,2.86,0.7,1.56,0.43,0.06,0.03,0.008,98,8,12.6,99.58,2403,0.2403,3,14.7,3.7,13.1,2.5,7.3,73.7,2,269.8,0.3,6.9,12.6,199,1.3,89.9,21.6,19.7,37.6,4.46,18.6,3.2,0.58,3.03,0.46,2.92,0.56,1.66,0.24,1.77,0.27,5.56,2.94,31.6,54.2,13.5,213,78.6,21.4,1.2,2.9,0.2,0.2,<0.5,0.35,1.4,9.4,1715,70.5,2.82,5.22,0.35,0.2,463,503,0.04,0.68,4.54,3.86,115,1,4,
"Kabanov et al., 2015, GSC OF7948",well,Little Bear N-09,300N096500126300,96E,64.982154,-126.5236909,Canol,Dodo Canyon,Core,1715.5,N09-1715.5,,76.21,6.16,2.85,0.46,0.29,0.69,1.02,0.32,0.07,<0.01,0.007,185,6,11.6,99.67,1709,0.1709,<1,12,2,7.5,1.7,4.4,43.3,<1,73.1,0.3,3.8,26.3,403,0.9,56.5,23.5,18.5,28.8,4.15,15.5,3.29,0.72,3.29,0.51,2.84,0.67,1.86,0.27,1.59,0.26,6.57,2.23,116.9,73.4,12.3,259,151.9,22.7,2.2,4.1,0.3,0.4,<0.5,0.21,2.2,9,1715.5,70.8,5.77,8.11,0.42,0.22,462,502,0.09,1.17,6.54,5.37,124,1,3,
"Kabanov et al., 2015, GSC OF7948",well,Little Bear N-09,300N096500126300,96E,64.982154,-126.5236909,Canol,Dodo Canyon,Core,1716,N09-1716,,85.67,3.64,1.32,0.25,0.26,0.34,0.56,0.14,0.08,<0.01,0.005,122,3,7.4,99.65,2304,0.2304,<1,6.2,1.2,3.5,0.6,2,24.3,<1,66.6,0.2,1.6,12.7,400,<0.5,24.8,13.2,9.8,14.6,2.32,10.3,1.86,0.42,1.84,0.26,1.44,0.33,0.9,0.12,0.85,0.12,4.41,1.07,47.8,30,5.2,212,93.4,12,1.3,2,<0.1,0.2,1,0.11,1.1,4.4,1716,70.8,5.23,6.07,0.46,0.12,461,501,0.05,0.95,4.8,3.85,126,1,3,
"Kabanov et al., 2015, GSC OF7948",well,Little Bear N-09,300N096500126300,96E,64.982154,-126.5236909,Canol,Dodo Canyon,Core,1716.5,N09-1716.5,,82.31,4.53,1.79,0.35,0.35,0.43,0.74,0.19,0.07,<0.01,0.005,120,3,8.8,99.6,3070,0.307,<1,7.1,1.6,4.8,0.9,2.7,32.5,<1,82.3,0.1,2.5,11.7,203,0.6,33.5,9.9,12,19.1,2.69,11.1,2.1,0.46,1.78,0.24,1.36,0.29,0.84,0.12,0.74,0.11,4.8,1.39,49.5,42.1,7.1,153,94.8,12.1,1,1.4,0.1,0.2,<0.5,0.18,0.8,6,1716.5,70.1,5.27,6.89,0.43,0.18,461,501,0.07,1.03,5.62,4.59,123,1,3,
"Kabanov et al., 2015, GSC OF7948",well,Little Bear N-09,300N096500126300,96E,64.982154,-126.5236909,Canol,Dodo Canyon,Core,1717,N09-1717,,80.88,4.64,2.5,0.31,0.19,0.34,0.82,0.27,0.05,<0.01,0.007,191,4,9.5,99.54,2461,0.2461,<1,15,2,6.6,1.7,4.4,40.5,<1,66.6,0.3,3.8,28.5,616,0.6,59.1,23.3,19.4,31.5,4.25,18.2,2.98,0.81,3.27,0.48,2.81,0.61,1.71,0.23,1.54,0.23,5.41,2.07,90.2,65.7,8.8,449,174.5,25.3,3.4,4.1,0.2,0.4,<0.5,0.18,1.7,8.8,1717,70.4,3.73,7.99,0.32,0.11,458,498,0.06,0.99,6.48,5.49,123,1,2,
"Kabanov et al., 2015, GSC OF7948",well,Little Bear N-09,300N096500126300,96E,64.982154,-126.5236909,Canol,Dodo Canyon,Core,1717.5,N09-1717.5,,77.64,6.09,2.96,0.43,0.35,0.61,1.05,0.31,0.06,<0.01,0.008,166,5,10,99.53,2914,0.2914,2,12.6,2.1,7.1,1.4,4.4,43.6,<1,95.2,0.3,4,16.1,501,0.6,49.7,11.2,16.9,25.6,3.73,14.3,2.55,0.46,1.97,0.26,1.55,0.31,0.9,0.15,1.03,0.16,5.89,2.33,70.6,71,12,245,133.9,24.3,2.5,4.3,0.2,0.5,<0.5,0.24,2.4,12,1717.5,70.9,5.84,8.18,0.42,0.1,459,499,0.05,1.18,5.77,4.59,142,1,2,
"Kabanov et al., 2015, GSC OF7948",well,Little Bear N-09,300N096500126300,96E,64.982154,-126.5236909,Canol,Dodo Canyon,Core,1718,N09-1718,,82.81,3.68,2.12,0.25,0.18,0.3,0.57,0.17,0.08,<0.01,0.005,126,3,9.4,99.64,2406,0.2406,3,8,1.4,5.4,0.9,3.4,28.2,<1,118.2,0.2,2.2,26.1,227,<0.5,38.8,20.8,24.3,33.7,5.64,22.6,3.31,0.73,3.44,0.45,2.32,0.49,1.35,0.18,1.06,0.18,5.23,1.79,79.1,42.2,5.7,168,101.6,16.1,1.2,1.9,0.1,0.2,<0.5,0.15,1.3,9.9,1718,70.4,5.69,8.39,0.4,0.13,455,495,0.06,1.19,6.63,5.44,127,1,2,
"Kabanov et al., 2015, GSC OF7948",well,Little Bear N-09,300N096500126300,96E,64.982154,-126.5236909,Canol,Dodo Canyon,Core,1718.5,N09-1718.5,,84.25,3.29,1.73,0.22,0.13,0.26,0.58,0.16,0.04,<0.01,0.004,128,3,8.8,99.44,3914,0.3914,<1,7.5,1.3,3.8,0.7,2.4,26.2,<1,78.9,0.1,2,15.4,479,<0.5,29.8,15.1,11.1,15.3,2.42,9.9,1.87,0.24,2.08,0.3,1.75,0.41,1.14,0.16,1.01,0.15,4.94,1.43,53.5,40.4,5.8,243,101,17,1.6,3,<0.1,0.3,<0.5,0.13,1.6,9,1718.5,70.4,6.81,7.39,0.48,0.26,452,492,0.06,1.19,5.22,4.03,142,1,5,
"Kabanov et al., 2015, GSC OF7948",well,Little Bear N-09,300N096500126300,96E,64.982154,-126.5236909,Canol,Dodo Canyon,Core,1719,N09-1719,,82.28,4.78,1.7,0.32,0.24,0.36,0.82,0.2,0.11,<0.01,0.007,115,4,8.4,99.27,5595,0.5595,1,6.1,2,5,1.1,2.9,37.7,<1,153.4,0.2,2.6,14.5,345,<0.5,37.9,21.3,16.5,23.7,3.75,16.1,3.26,0.65,3.5,0.44,2.47,0.52,1.43,0.21,1.31,0.19,4.56,1.4,49.4,37.8,6,177,90.2,14.4,1.3,2,<0.1,0.2,<0.5,0.18,1.3,6.6,1719,70.5,5.5,6.51,0.46,0.15,460,500,0.04,1.01,4.85,3.84,134,1,3,
"Kabanov et al., 2015, GSC OF7948",well,Little Bear N-09,300N096500126300,96E,64.982154,-126.5236909,Canol,Dodo Canyon,Core,1719.5,N09-1719.5,,71.72,7.59,3.98,0.54,0.17,0.52,1.34,0.42,0.08,<0.01,0.011,223,8,12.8,99.21,5261,0.5261,8,15.2,3.4,10.6,2.3,7.7,65.9,2,146.9,0.4,7.1,31.5,388,1.2,94.8,48.2,30.7,44.6,7.16,31.3,6.16,1.21,7.11,1.03,6.14,1.12,3.33,0.44,2.61,0.43,6.83,3.31,116.8,86.6,12.4,429,203.6,29.9,2.9,4.4,0.3,0.5,<0.5,0.37,3.1,14.7,1719.5,50.6,4.04,8.65,0.32,0.17,459,499,0.04,1.07,7.31,6.24,118,1,2,
"Kabanov et al., 2015, GSC OF7948",well,Little Bear N-09,300N096500126300,96E,64.982154,-126.5236909,Canol,Dodo Canyon,Core,1720,N09-1720,,75,7.43,3.28,0.48,0.13,0.44,1.28,0.32,0.06,<0.01,0.008,156,6,10.9,99.33,4577,0.4577,5,14.3,4.1,9.2,2.1,6.4,72.6,3,128,0.5,5.1,26.1,405,1,74.2,31.3,27.4,37.4,5.6,22.8,4.42,0.99,4.41,0.62,3.11,0.78,2.1,0.32,2.02,0.33,5.65,2.64,93.6,64.7,10.1,320,131.9,25.5,2.1,3.9,0.2,0.4,<0.5,0.3,2.9,13.3,1720,70.7,6.01,8.17,0.42,0.15,457,497,0.05,1.19,5.81,4.62,141,1,3,
"Kabanov et al., 2015, GSC OF7948",well,Little Bear N-09,300N096500126300,96E,64.982154,-126.5236909,Canol,Dodo Canyon,Core,1720.5,N09-1720.5,,74.04,5.93,4.13,0.39,0.23,0.43,1.08,0.27,0.08,<0.01,0.007,169,6,12.3,98.9,9109,0.9109,2,14,2.5,7.2,1.7,4.3,50.7,<1,138.7,0.4,3.7,31.4,244,1.3,62.3,27.5,23.6,33,5.11,20.5,4.06,0.95,4.58,0.61,3.32,0.68,1.96,0.27,1.51,0.25,6.65,3.37,99.7,69.7,10.8,369,137.7,35.7,2.6,3.8,0.2,0.4,<0.5,0.28,2.3,16,1720.5,70.1,5.52,9.35,0.37,0.18,460,500,0.06,1.25,7.21,5.96,130,1,2,
"Kabanov et al., 2015, GSC OF7948",well,Little Bear N-09,300N096500126300,96E,64.982154,-126.5236909,Canol,Dodo Canyon,Core,1721,N09-1721,,70.57,9.21,4.57,0.67,0.19,0.49,1.79,0.4,0.06,<0.01,0.01,168,9,11.3,99.31,4892,0.4892,2,16.3,4.4,10.3,2.2,6.2,82,1,132.7,0.4,5.3,14.9,257,0.8,78.7,27.7,25.3,40,5.93,24.5,4.78,1,4.61,0.65,3.71,0.77,2.2,0.31,2.04,0.36,5.1,3.57,54.1,73.7,12.1,324,151.1,25.6,2.1,3.9,0.2,0.5,<0.5,0.38,3.8,11.9,1721,70.2,4.1,6.25,0.4,0.16,462,502,0.05,0.88,5.26,4.38,119,1,3,
"Kabanov et al., 2015, GSC OF7948",well,Little Bear N-09,300N096500126300,96E,64.982154,-126.5236909,Canol,Dodo Canyon,Core,1721.5,N09-1721.5,,71.99,8.37,3.94,0.58,0.2,0.56,1.61,0.38,0.07,<0.01,0.01,189,8,11.6,99.35,4553,0.4553,2,13.5,3.2,8.7,2.3,5.9,69.4,<1,114,0.4,5.2,19.6,271,0.9,80.2,23.2,22.5,33.1,4.89,19.5,3.85,0.85,4.21,0.59,3.42,0.69,1.88,0.29,1.85,0.28,5.8,3.07,91.4,88,14.2,329,173.5,25.8,2.5,4.2,0.3,0.4,1.2,0.34,2.8,11.4,1721.5,70.4,3.47,7.19,0.33,0.12,463,503,0.05,0.9,6.08,5.18,118,1,2,
"Kabanov et al., 2015, GSC OF7948",well,Little Bear N-09,300N096500126300,96E,64.982154,-126.5236909,Canol,Dodo Canyon,Core,1722,N09-1722,,6.27,1.47,0.86,16.29,27.2,0.35,0.22,0.08,0.08,0.24,<0.002,<20,2,42.1,95.17,38858,3.8858,1,1.8,0.4,1.2,0.5,1.2,8.6,<1,1746.5,0.3,0.9,1.2,28,<0.5,22.4,8.1,7,9.1,1.04,4.1,0.77,0.53,1.18,0.14,1.03,0.21,0.6,0.08,0.57,0.11,11.48,0.53,1.8,8.2,1.8,19,6.7,3.1,0.2,0.2,<0.1,<0.1,<0.5,0.06,0.2,<0.5,1722,70.3,0.52,1.05,0.33,0.22,465,505,0.01,0.14,0.92,0.78,114,1,24,
"Kabanov et al., 2015, GSC OF7948",well,Little Bear N-09,300N096500126300,96E,64.982154,-126.5236909,Canol,Dodo Canyon,Core,1722.5,N09-1722.5,,66.77,10.48,4.78,0.95,0.67,1.27,2.07,0.54,0.08,0.02,0.011,89,9,11.8,99.41,4189,0.4189,2,15.2,3.5,11.4,3.1,8.5,78.7,2,157.1,0.6,6.7,13.7,179,1.5,108.1,20.1,26.5,52.1,6.22,25.7,5.01,0.84,4.44,0.64,3.59,0.76,2.02,0.3,1.85,0.29,5.76,3.7,24.3,93.9,12.7,140,77.4,22.4,4.9,1.6,0.3,0.3,<0.5,0.37,0.7,4.6,1722.5,70,3.41,5.93,0.36,0.24,463,503,0.03,0.79,5.73,4.94,103,1,4,
"Kabanov et al., 2015, GSC OF7948",well,Little Bear N-09,300N096500126300,96E,64.982154,-126.5236909,Canol,Dodo Canyon,Core,1723,N09-1723,,69.69,9.38,3.99,0.68,0.38,0.95,1.91,0.48,0.08,<0.01,0.01,171,9,11.7,99.31,4696,0.4696,4,17.3,3.6,11.4,2.7,7.9,77.3,1,144.6,0.4,6.1,27,429,1,95.6,22.4,26.1,46.1,5.83,23.2,4.54,0.8,4.17,0.63,3.51,0.73,2.08,0.3,1.96,0.3,6.08,3.05,86.5,75.9,13.7,260,139.5,26.7,2.2,3.5,0.2,0.4,<0.5,0.28,2,7,1723,70.5,4.83,7.01,0.41,0.23,462,502,0.07,1,6.75,5.75,104,1,3,
"Kabanov et al., 2015, GSC OF7948",well,Little Bear N-09,300N096500126300,96E,64.982154,-126.5236909,Canol,Dodo Canyon,Core,1723.5,N09-1723.5,,62.32,15.41,4.1,1.14,0.28,0.99,3.2,0.81,0.09,<0.01,0.015,161,13,11,99.35,3826,0.3826,4,21.1,6.4,19.6,4,12.6,126.5,2,147.6,0.9,10.8,16.6,770,1.7,147.7,26.6,31.7,53.3,6.44,24.2,4,0.76,3.59,0.59,3.86,0.8,2.53,0.39,2.65,0.41,3.83,2.81,62.6,67.3,21.3,189,130.4,32.2,1.6,3.4,0.3,0.4,<0.5,0.35,1.7,7.2,1723.5,70.9,1.82,4.06,0.31,0.15,465,505,0.02,0.5,4.07,3.57,100,0,4,
"Kabanov et al., 2015, GSC OF7948",well,Little Bear N-09,300N096500126300,96E,64.982154,-126.5236909,Canol,Dodo Canyon,Core,1724,N09-1724,,75.51,6.84,3.38,0.55,0.38,0.66,1.38,0.37,0.12,<0.01,0.007,169,7,10.2,99.38,4167,0.4167,<1,13.9,2.7,8.5,1.9,5.9,55.6,1,140.1,0.4,5,18.5,488,0.5,67.7,27.6,22.1,35.2,4.54,17.2,3.28,0.73,3.48,0.55,3.3,0.69,2.08,0.31,1.98,0.31,5.26,2.62,65.3,59.9,12.2,252,132.3,25.8,2,4.3,0.2,0.5,<0.5,0.26,1.9,8.7,1724,70.5,4.54,6.41,0.41,0.3,455,495,0.07,0.93,5.26,4.33,122,1,6,
"Kabanov et al., 2015, GSC OF7948",well,Little Bear N-09,300N096500126300,96E,64.982154,-126.5236909,Canol,Dodo Canyon,Core,1724.5,N09-1724.5,,77.88,6.32,2.91,0.4,0.22,0.56,1.25,0.34,0.11,<0.01,0.009,191,6,9.3,99.34,3929,0.3929,1,12.9,2.7,6.4,1.8,5.2,50.9,<1,138.4,0.3,4.5,18.7,889,<0.5,65.2,24.9,23.2,36.4,4.99,21,3.93,0.84,3.67,0.55,3.07,0.64,1.75,0.25,1.76,0.27,4.92,2.25,69.7,57.7,10.3,355,155.2,28.2,2.6,5.9,0.2,0.4,<0.5,0.22,3.4,7.8,1724.5,71,5.01,7.28,0.41,0.33,457,497,0.08,1.04,6.38,5.34,114,1,5,
"Kabanov et al., 2015, GSC OF7948",well,Little Bear N-09,300N096500126300,96E,64.982154,-126.5236909,Canol,Dodo Canyon,Core,1725,N09-1725,,82.6,4.82,2.13,0.32,0.18,0.44,0.95,0.26,0.07,<0.01,0.006,140,4,7.6,99.44,3551,0.3551,<1,9.8,1.7,5.6,1.4,4.1,38.7,<1,101.9,0.3,3.3,10.2,651,0.6,50.4,16,15.6,23.2,3.11,12,2.08,0.46,2.23,0.34,1.92,0.42,1.21,0.18,1.15,0.19,4.08,1.66,46.7,44.3,8.3,311,101.7,19.4,2,3.6,0.1,0.4,<0.5,0.16,1.6,6.4,1725,70.9,4.26,5.18,0.45,0.27,459,499,0.06,0.8,4.93,4.13,105,1,5,
"Kabanov et al., 2015, GSC OF7948",well,Little Bear N-09,300N096500126300,96E,64.982154,-126.5236909,Canol,Dodo Canyon,Core,1725.5,N09-1725.5,,80.67,5.26,2.17,0.38,0.19,0.57,1.09,0.28,0.06,<0.01,0.007,170,5,8.5,99.25,5067,0.5067,<1,11.8,2.2,6.5,1.8,6.3,48.6,<1,116.9,0.4,4.5,15,756,1.3,64.7,20.6,17.3,27.4,3.95,15.3,2.85,0.59,2.99,0.45,2.53,0.59,1.57,0.23,1.4,0.21,4.76,1.66,48.3,42.5,7.7,275,109,18.9,2.1,3.6,0.1,0.4,<0.5,0.18,1.1,6.4,1725.5,70.5,5.83,4.96,0.54,0.19,460,500,0.09,0.91,5,4.09,99,2,4,
"Kabanov et al., 2015, GSC OF7948",well,Little Bear N-09,300N096500126300,96E,64.982154,-126.5236909,Canol,Dodo Canyon,Core,1726,N09-1726,,76.75,7.63,2.67,0.59,0.3,0.64,1.6,0.4,0.09,<0.01,0.01,153,7,8.4,99.12,4729,0.4729,<1,14.8,3.7,11.8,2.6,8.2,72.9,1,159.9,0.5,5.9,15.5,867,1.3,98,29.7,26.9,42.1,6.04,24.2,4.43,0.77,4.41,0.64,3.98,0.77,2.42,0.32,2.21,0.32,4.43,1.97,57.5,51.1,9.3,361,112.6,21.3,2.8,4.4,0.2,0.4,<0.5,0.18,1.5,7.8,1726,70.1,4.47,4.33,0.51,0.16,464,504,0.05,0.75,4.42,3.67,98,1,4,
"Kabanov et al., 2015, GSC OF7948",well,Little Bear N-09,300N096500126300,96E,64.982154,-126.5236909,Canol,Dodo Canyon,Core,1726.5,N09-1726.5,,74.79,8.22,2.98,0.57,0.21,0.62,1.69,0.45,0.09,<0.01,0.011,168,7,9.6,99.28,4145,0.4145,3,18.8,3.5,11.1,2.9,8.3,76.5,2,136.6,0.8,6.7,20.5,926,0.9,106.5,31.2,27.1,43.6,6.09,24.9,4.61,0.81,4.56,0.66,3.99,0.84,2.44,0.37,2.4,0.34,4.83,2.22,71,65.7,11.2,447,126.9,23.1,2.9,5,0.2,0.4,<0.5,0.24,1.8,7.7,1726.5,70.6,4.1,4.97,0.45,0.16,465,505,0.05,0.77,4.77,4,104,1,3,
"Kabanov et al., 2015, GSC OF7948",well,Little Bear N-09,300N096500126300,96E,64.982154,-126.5236909,Canol,Dodo Canyon,Core,1727,N09-1727,,84.35,4.36,1.47,0.32,0.25,0.43,0.88,0.22,0.06,<0.01,0.005,102,5,6.9,99.25,5592,0.5592,<1,9,1.7,5.5,1.5,4.6,41.4,<1,140.1,0.3,2.9,10.7,515,<0.5,56.1,17.4,15.1,22.5,3.28,13.7,2.57,0.46,2.5,0.38,2.29,0.48,1.39,0.19,1.26,0.19,3.58,1.2,34.7,36.4,6.9,187,74.6,12.2,1.5,2.7,<0.1,0.2,<0.5,0.1,0.8,5,1727,69.8,3.75,3.18,0.54,0.15,462,502,0.05,0.59,2.98,2.39,107,2,5,
"Kabanov et al., 2015, GSC OF7948",well,Little Bear N-09,300N096500126300,96E,64.982154,-126.5236909,Canol,Dodo Canyon,Core,1727.5,N09-1727.5,,82.52,5.44,1.71,0.38,0.2,0.48,1.14,0.28,0.08,<0.01,0.007,124,5,7.1,99.38,4070,0.407,<1,7.7,1.8,5.3,1.6,4.6,44.4,1,144.9,0.2,3.6,13.5,678,0.5,55.7,22.7,17.7,26.8,3.78,14.8,2.9,0.81,3.4,0.49,2.89,0.6,1.89,0.25,1.67,0.25,4.07,1.24,44.6,44.3,7,238,89.7,13.3,1.6,3.7,0.1,0.3,<0.5,0.12,1.2,5,1727.5,70.6,2.69,3.07,0.47,0.15,457,497,0.05,0.5,3.99,3.49,77,1,4,
"Kabanov et al., 2015, GSC OF7948",well,Little Bear N-09,300N096500126300,96E,64.982154,-126.5236909,Canol,Dodo Canyon,Core,1728,N09-1728,,70.89,10.33,4.08,0.75,0.17,0.67,2.21,0.56,0.09,<0.01,0.013,198,10,9.6,99.36,3162,0.3162,4,14.9,4.6,12.6,3,8.5,88.5,1,113.4,0.6,7.2,12.1,1086,1.1,102,28.2,28.3,46.3,6.01,23.1,3.98,0.74,3.73,0.59,3.55,0.77,2.47,0.36,2.32,0.37,4.07,2.99,81.2,78.2,14.1,476,166.9,29.2,3.8,5.9,0.2,0.6,<0.5,0.23,2.1,13.5,1728,71,3.68,4.39,0.46,0.12,463,503,0.02,0.68,4.27,3.59,103,0,3,
"Kabanov et al., 2015, GSC OF7948",well,Little Bear N-09,300N096500126300,96E,64.982154,-126.5236909,Canol,Dodo Canyon,Core,1728.5,N09-1728.5,,74.53,8.16,3.18,0.58,0.24,0.6,1.71,0.43,0.1,<0.01,0.011,185,6,9.7,99.28,4296,0.4296,6,12.1,2.8,9.8,2.3,6.8,68.4,1,137,0.5,5.4,13.8,874,1.1,77.1,18.4,24.5,38,5,20,3.45,0.66,3.18,0.46,2.62,0.55,1.56,0.25,1.58,0.25,4.84,2.4,79.5,70.4,11.8,496,153.6,25.9,3.4,5.2,0.2,0.5,<0.5,0.22,1.6,10.1,1728.5,70.4,3.87,4.56,0.46,0.2,460,500,0.06,0.72,4.61,3.89,99,1,4,
"Kabanov et al., 2015, GSC OF7948",well,Little Bear N-09,300N096500126300,96E,64.982154,-126.5236909,Canol,Dodo Canyon,Core,1729,N09-1729,,73.7,8.95,2.69,0.59,0.25,0.78,1.8,0.45,0.11,<0.01,0.009,168,8,10.1,99.42,3557,0.3557,2,12.1,3,9.8,2.2,7.2,69.8,1,154,0.4,5.6,17.9,657,0.8,79.4,21.4,24.7,41.1,5.33,20.5,3.68,0.66,3.37,0.51,2.98,0.62,1.97,0.27,1.7,0.27,5.03,1.98,70.7,69.1,13.5,258,127,21.7,2,4.6,0.2,0.5,<0.5,0.2,1.6,7.6,1729,70.2,3.88,5.63,0.41,0.08,465,505,0.03,0.8,5.16,4.36,109,1,2,
"Kabanov et al., 2015, GSC OF7948",well,Little Bear N-09,300N096500126300,96E,64.982154,-126.5236909,Canol,Dodo Canyon,Core,1729.5,N09-1729.5,,85.72,4.19,1.34,0.28,0.15,0.36,0.8,0.19,0.09,<0.01,0.005,105,4,6.4,99.5,3307,0.3307,<1,6.4,1.8,4.1,0.9,2.9,32.5,<1,123.4,0.2,2.6,12.6,487,0.6,33.4,17.2,12.7,19.5,2.85,11.2,2.45,0.45,2.45,0.34,2.05,0.4,1.14,0.18,0.94,0.16,3.94,1.02,40.3,34.7,6,264,82.5,10.4,1.8,2.4,<0.1,0.3,<0.5,0.11,1.2,4.2,1729.5,70.7,3.83,4.58,0.46,0.1,464,504,0.06,0.71,4.05,3.34,113,1,2,
"Kabanov et al., 2015, GSC OF7948",well,Little Bear N-09,300N096500126300,96E,64.982154,-126.5236909,Canol,Dodo Canyon,Core,1730,N09-1730,,87.28,2.46,0.97,0.15,0.08,0.22,0.44,0.11,0.04,<0.01,0.003,66,2,5.4,97.16,23662,2.3662,3,3.2,1.1,2,0.5,1.7,17.2,<1,1287.5,0.2,1.3,9.9,261,<0.5,19.8,13.5,9.6,11.4,1.67,6.9,1.42,0.55,1.71,0.23,1.39,0.27,0.85,0.12,0.75,0.11,2.73,0.71,27.6,19.4,3.1,124,48.3,6.7,0.9,1.5,<0.1,0.1,<0.5,0.07,0.8,3,1730,70.8,2.27,2.5,0.48,0.18,462,502,0.08,0.41,2.23,1.82,112,4,8,
"Kabanov et al., 2015, GSC OF7948",well,Little Bear N-09,300N096500126300,96E,64.982154,-126.5236909,Canol,Dodo Canyon,Core,1730.5,N09-1730.5,,80.72,5.52,2.2,0.35,0.12,0.44,1.08,0.28,0.07,<0.01,0.008,154,5,8.6,99.44,3581,0.3581,2,8.2,1.9,6.1,1.3,4.2,42.8,<1,104.5,0.3,3.5,17.4,605,<0.5,46.2,22.3,17.2,26.4,3.75,14.9,2.73,0.63,3.16,0.47,2.58,0.56,1.65,0.24,1.46,0.22,5.09,1.73,70.5,56.6,9,281,114.7,17,2,3.6,0.1,0.4,<0.5,0.14,1.2,9.6,1730.5,70.1,3.24,4.33,0.43,0.2,458,498,0.05,0.65,4.82,4.17,90,1,4,
"Kabanov et al., 2015, GSC OF7948",well,Little Bear N-09,300N096500126300,96E,64.982154,-126.5236909,Canol,Dodo Canyon,Core,1731,N09-1731,,81.36,5.01,2.35,0.31,0.18,0.41,0.96,0.26,0.1,<0.01,0.006,149,5,8.6,99.55,2816,0.2816,4,11,2,5.5,1.4,4.1,38.6,<1,120.2,0.3,3.3,20.2,400,0.7,45.8,21.2,16.2,25.1,3.46,12.4,2.68,0.57,3.07,0.46,2.59,0.56,1.7,0.22,1.43,0.22,5.43,1.84,78.7,64.8,11.2,306,108.4,17.3,2.7,3.9,0.1,0.3,<0.5,0.15,1.8,6.9,1731,70.2,4.14,5.68,0.42,0.13,459,499,0.07,0.83,5.69,4.86,100,1,2,
"Kabanov et al., 2015, GSC OF7948",well,Little Bear N-09,300N096500126300,96E,64.982154,-126.5236909,Canol,Dodo Canyon,Core,1731.5,N09-1731.5,,79.23,5.86,2.13,0.61,0.6,0.64,1.16,0.28,0.1,0.01,0.006,127,7,8.7,99.39,4368,0.4368,2,8.9,2.2,5.9,1.3,4.3,42.5,<1,169.9,0.3,3.9,18.6,358,0.8,49.3,22.4,17.6,29.4,3.93,16,2.9,0.74,3.43,0.51,2.9,0.57,1.62,0.24,1.46,0.24,5.02,1.64,48.1,50.9,11.1,154,99.8,18,1.2,3.5,0.1,0.3,<0.5,0.19,1.1,7.8,1731.5,70.3,4.85,5.33,0.48,0.17,464,504,0.15,0.87,4.96,4.09,107,3,3,
"Kabanov et al., 2015, GSC OF7948",well,Little Bear N-09,300N096500126300,96E,64.982154,-126.5236909,Canol,Dodo Canyon,Core,1732,N09-1732,,84.35,4.36,1.45,0.26,0.15,0.38,0.81,0.19,0.05,<0.01,0.006,105,3,7.6,99.56,3308,0.3308,2,7.8,1.5,4.5,0.9,2.9,31.6,<1,85,0.2,2.6,11.8,280,0.5,31.8,11.4,10.5,16.7,2.32,10,1.66,0.35,1.81,0.25,1.42,0.3,0.88,0.12,0.81,0.11,4.75,1.16,43.6,38.2,6.9,141,71.4,9.9,1.1,1.8,<0.1,0.2,<0.5,0.09,0.8,4.4,1732,70.7,4.17,5.32,0.44,0.16,463,503,0.04,0.8,4.52,3.72,118,1,4,
"Kabanov et al., 2015, GSC OF7948",well,Little Bear N-09,300N096500126300,96E,64.982154,-126.5236909,Canol,Dodo Canyon,Core,1732.5,N09-1732.5,,80.65,5.62,2.12,0.38,0.25,0.5,1.09,0.26,0.05,<0.01,0.006,126,4,8.3,99.22,6023,0.6023,1,8.9,1.9,5.6,1.2,3.9,43,<1,99.5,0.3,3.4,10.3,378,0.7,44.3,13.1,13.4,20.8,2.94,11.6,1.95,0.33,1.87,0.28,1.56,0.32,1.11,0.15,1.01,0.17,4.54,1.75,51.6,55.6,10.8,219,92.3,17.1,2,3.3,0.1,0.4,<0.5,0.15,1.5,8.6,1732.5,70.3,4.26,6.4,0.4,0.32,459,499,0.08,0.91,5.06,4.15,126,2,6,
"Kabanov et al., 2015, GSC OF7948",well,Little Bear N-09,300N096500126300,96E,64.982154,-126.5236909,Canol,Dodo Canyon,Core,1733,N09-1733,,80.88,5.45,2.09,0.34,0.17,0.37,1.06,0.29,0.08,<0.01,0.007,135,6,8.7,99.5,3054,0.3054,<1,9.5,2.6,6.4,1.4,4,43.9,<1,101.8,0.3,3.7,17.7,537,0.9,46.9,24.4,18.1,26.1,3.92,15.9,2.8,0.7,3.14,0.47,2.92,0.62,1.72,0.26,1.55,0.24,4.83,1.59,66.2,56.7,8.9,371,100.9,16.4,2.6,4.2,0.2,0.3,0.7,0.13,2.1,7.8,1733,70,4.23,5.63,0.43,0.31,460,500,0.09,0.84,4.96,4.12,114,2,6,
"Kabanov et al., 2015, GSC OF7948",well,Little Bear N-09,300N096500126300,96E,64.982154,-126.5236909,Canol,Dodo Canyon,Core,1733.5,N09-1733.5,,84.03,4.55,1.48,0.28,0.14,0.38,0.84,0.2,0.07,<0.01,0.005,98,4,7.5,99.49,3793,0.3793,2,7.8,2,4.6,0.9,3.1,35.6,<1,97,0.3,2.6,12.1,311,0.6,33.3,17.4,12.2,19.4,2.71,11.1,2.08,0.5,2.4,0.33,2.06,0.4,1.2,0.17,1.09,0.16,4.29,1.21,48.9,49.6,8.2,190,87,12.1,1.6,2.1,<0.1,0.2,<0.5,0.11,0.9,5.5,1733.5,70.8,4.78,5.62,0.46,0.28,455,495,0.07,0.89,4.34,3.45,129,2,6,
"Kabanov et al., 2015, GSC OF7948",well,Little Bear N-09,300N096500126300,96E,64.982154,-126.5236909,Canol,Dodo Canyon,Core,1734,N09-1734,,84.89,3.88,1.38,0.25,0.18,0.37,0.73,0.16,0.05,<0.01,0.004,96,3,7.7,99.62,2802,0.2802,<1,6.4,1.5,3.8,0.8,2.3,28.6,<1,80.4,0.2,1.9,10.3,204,<0.5,27.6,13.5,10.6,16.6,2.24,9,1.78,0.38,2,0.28,1.63,0.34,0.88,0.12,0.85,0.14,4.85,1.12,49.2,40.1,6.7,184,68.3,9.4,1.4,1.7,<0.1,0.2,<0.5,0.09,0.7,3.7,1734,70.5,4.54,6.04,0.43,0.27,460,500,0.06,0.9,5.01,4.11,121,1,5,
"Kabanov et al., 2015, GSC OF7948",well,Little Bear N-09,300N096500126300,96E,64.982154,-126.5236909,Canol,Dodo Canyon,Core,1734.5,N09-1734.5,,80.81,5.79,1.99,0.38,0.18,0.46,1.09,0.25,0.08,<0.01,0.007,121,5,8.6,99.63,2530,0.253,1,10,2.1,6.2,1.1,3.5,45.5,<1,94.8,0.2,3.5,15.4,270,<0.5,39.8,24.9,17.6,27.3,3.87,15.4,3.25,0.76,3.7,0.52,2.9,0.61,1.72,0.24,1.43,0.22,4.93,1.52,49.9,48.4,9.8,174,95,13.8,1.1,1.9,0.1,0.2,<0.5,0.15,1.1,5.8,1734.5,70.7,4.12,5.54,0.43,0.17,464,504,0.04,0.82,4.96,4.14,112,1,3,
"Kabanov et al., 2015, GSC OF7948",well,Little Bear N-09,300N096500126300,96E,64.982154,-126.5236909,Canol,Dodo Canyon,Core,1735,N09-1735,,79.57,5.76,2.41,0.36,0.14,0.44,1.12,0.26,0.07,<0.01,0.007,124,5,9.5,99.6,2595,0.2595,3,10.1,2.6,6.9,1.2,3.9,46.5,<1,88,0.3,3.7,22.1,270,0.8,41.9,26.2,18.5,29.7,4.21,17,3.4,0.77,3.62,0.52,2.88,0.57,1.81,0.25,1.67,0.24,5.44,1.87,65.4,61.7,9.3,216,99.3,15.4,1.5,2.3,0.1,0.2,<0.5,0.13,1.2,6.1,1735,70.4,3.79,6.93,0.35,0.15,460,500,0.07,0.9,5.98,5.08,116,1,3,
"Kabanov et al., 2015, GSC OF7948",well,Little Bear N-09,300N096500126300,96E,64.982154,-126.5236909,Canol,Dodo Canyon,Core,1735.5,N09-1735.5,,76.51,6.59,2.97,0.42,0.16,0.5,1.23,0.29,0.07,<0.01,0.008,171,6,10.8,99.53,3238,0.3238,2,9.8,2.9,8.1,1.2,4.1,52.6,<1,100.1,0.3,4.3,18.8,283,0.8,45.7,23.6,21.9,32.4,4.71,19.5,3.44,0.75,3.26,0.46,2.81,0.57,1.71,0.23,1.54,0.25,5.81,2.33,75.5,66.6,11.9,200,95,20.9,1.6,2.4,0.2,0.3,<0.5,0.23,1.2,11.2,1735.5,70.6,5.36,7.58,0.41,0.15,460,500,0.06,1.09,6.01,4.92,126,1,2,
"Kabanov et al., 2015, GSC OF7948",well,Little Bear N-09,300N096500126300,96E,64.982154,-126.5236909,Canol,Dodo Canyon,Core,1736,N09-1736,,82.55,4.49,1.63,0.37,0.27,0.38,0.85,0.21,0.05,<0.01,0.005,108,4,8.7,99.48,3854,0.3854,4,5.8,1.8,4.8,1,3,34.6,<1,164.3,0.2,2.7,12.1,271,<0.5,37.8,21.1,14,20,2.95,12.5,2.75,0.7,3.33,0.46,2.54,0.51,1.45,0.21,1.24,0.18,5.19,1.29,46.6,40.4,6.3,206,80.2,11.2,1.4,2.3,0.1,0.2,<0.5,0.12,1.1,5.3,1736,70.4,5.47,8.59,0.39,0.18,459,499,0.05,1.18,6.77,5.59,127,1,3,
"Kabanov et al., 2015, GSC OF7948",well,Little Bear N-09,300N096500126300,96E,64.982154,-126.5236909,Canol,Dodo Canyon,Core,1736.5,N09-1736.5,,71.55,9.27,3.04,0.65,0.2,0.59,1.81,0.39,0.09,<0.01,0.008,144,8,11.9,99.56,2787,0.2787,3,10.5,3.9,10.5,1.9,5.7,73.4,1,117.3,0.5,7.1,29.9,297,1.1,62.7,28.2,26.6,43.5,5.86,23.4,4.35,1.02,4.32,0.61,3.45,0.76,2.08,0.32,2.08,0.31,6.62,2.29,82.8,56.4,10.8,263,100,17.9,1.8,2.7,0.2,0.2,<0.5,0.22,1.7,6.9,1736.5,69.9,3.76,7.95,0.32,0.15,464,504,0.12,0.99,6.47,5.48,123,2,2,
"Kabanov et al., 2015, GSC OF7948",well,Little Bear N-09,300N096500126300,96E,64.982154,-126.5236909,Canol,Dodo Canyon,Core,1737,N09-1737,,79.17,5.12,1.97,0.41,0.28,0.47,0.98,0.23,0.05,<0.01,0.005,128,5,10.8,99.55,3042,0.3042,<1,7.8,1.9,5.1,1,3.7,38.2,<1,113.9,0.2,3.2,19.6,285,0.9,40.7,18.4,16.1,25.9,3.54,14.4,2.49,0.61,2.76,0.4,2.19,0.45,1.31,0.19,1.25,0.17,7.1,1.57,55.3,44.8,7.9,278,86.5,13.1,2.2,2.2,0.1,0.2,<0.5,0.14,0.7,4.4,1737,70.4,5.9,9.9,0.37,0.17,459,499,0.05,1.33,7.17,5.84,138,1,2,
"Kabanov et al., 2015, GSC OF7948",well,Little Bear N-09,300N096500126300,96E,64.982154,-126.5236909,Canol,Dodo Canyon,Core,1737.5,N09-1737.5,,71.14,8.09,3.93,0.52,0.3,0.67,1.55,0.38,0.06,0.01,0.008,136,8,12.9,99.62,2446,0.2446,4,12.7,3.2,10.2,1.8,6,60.9,<1,92.1,0.3,5,32.4,174,1,62.9,20.5,24.4,39,5.21,20.6,3.77,0.87,3.73,0.51,2.95,0.57,1.73,0.26,1.66,0.26,7.26,3.05,91,81,12.3,242,103.9,16.8,1.7,2.8,0.2,0.3,0.6,0.36,1.3,9.3,1737.5,70.1,3.83,8.69,0.31,0.14,462,502,0.04,1.06,7.21,6.15,121,1,2,
"Kabanov et al., 2015, GSC OF7948",well,Little Bear N-09,300N096500126300,96E,64.982154,-126.5236909,Canol,Dodo Canyon,Core,1738,N09-1738,,61.35,10.25,4.3,2.31,3.14,0.85,2.19,0.47,0.06,0.03,0.01,53,11,14.6,99.61,2462,0.2462,2,13.2,3.5,11.1,2.1,7.3,79.5,1,146.4,0.6,6.8,12.8,123,1.2,81.6,23.2,23.6,42.9,5.37,21.4,3.92,0.87,3.93,0.63,3.41,0.72,2.04,0.29,1.91,0.32,6.48,3.16,17.9,63.9,13.1,88,50,13.7,1.6,1.4,0.3,0.3,<0.5,0.33,0.5,4,1738,70.5,3.13,6.09,0.34,0.24,465,505,0.03,0.78,5.67,4.89,107,1,4,
"Kabanov et al., 2015, GSC OF7948",well,Little Bear N-09,300N096500126300,96E,64.982154,-126.5236909,Canol,Dodo Canyon,Core,1738.45,N09-1738.45,,30.09,3,1.46,11.85,19.56,0.44,0.58,0.15,0.04,0.14,0.003,<20,4,31.9,99.27,3693,0.3693,3,4.5,0.9,3.2,0.7,2.2,20.9,<1,853.2,0.1,1.6,4.1,53,<0.5,34.4,26,16.1,24.1,3.11,12.9,2.34,0.62,2.91,0.43,2.64,0.61,1.77,0.26,1.64,0.26,10.48,0.98,4.2,17.8,3.9,31,15.1,4.4,0.8,0.3,<0.1,<0.1,<0.5,0.11,0.3,0.9,1738.45,70.9,3.18,3.61,0.47,0.28,462,502,0.05,0.59,3.57,2.98,101,1,8,
"Kabanov et al., 2015, GSC OF7948",well,Little Bear N-09,300N096500126300,96E,64.982154,-126.5236909,Canol,Dodo Canyon,Core,1739,N09-1739,,68.5,11.01,4.16,0.89,0.92,0.64,2.35,0.51,0.08,0.02,0.009,112,11,10.4,99.51,3254,0.3254,2,15.3,4.7,12.7,2.5,7.3,93.2,2,130.3,0.5,6.6,17.1,238,1.1,95.2,23.6,26.6,47.7,5.73,22.5,4.29,0.87,4.09,0.6,3.42,0.73,2.11,0.32,2.03,0.33,4.21,3.06,38.7,57.3,12.7,165,93.7,16.9,1,1.8,0.2,0.2,<0.5,0.26,1.3,3.9,1739,70.5,3.44,5.35,0.39,0.44,461,501,0.14,0.76,4.22,3.46,127,3,10,
"Kabanov et al., 2015, GSC OF7948",well,Little Bear N-09,300N096500126300,96E,64.982154,-126.5236909,Canol,Vermillion Creek,Core,1739.5,N09-1739.5,,69.18,10.62,3.74,0.9,1.15,0.72,1.93,0.45,0.07,0.03,0.007,73,10,10.8,99.55,3184,0.3184,1,13.2,3.3,9.9,2.4,6.9,72,1,151.2,0.6,8.7,14.5,151,0.9,83.3,19.6,26.3,48.7,5.69,21.6,4.34,0.82,3.66,0.55,3.31,0.59,1.81,0.26,1.59,0.25,4.22,2.87,28,51.8,17.5,94,50.5,15,0.8,1.7,0.2,0.2,<0.5,0.22,0.7,3.1,1739.5,70.3,4.08,5.64,0.42,0.27,453,493,0.05,0.82,3.97,3.15,142,1,7,
"Kabanov et al., 2015, GSC OF7948",well,Little Bear N-09,300N096500126300,96E,64.982154,-126.5236909,Canol,Vermillion Creek,Core,1740,N09-1740,,66.29,12.76,4.59,1.04,0.71,0.82,2.68,0.59,0.08,0.02,0.01,67,13,10,99.6,2550,0.255,4,20.7,5,13.7,3.6,9.3,101.4,2,145.5,0.6,8.6,11.5,164,0.8,112.4,27.1,35.4,67.5,7.9,29.7,5.28,1.04,4.51,0.7,4.25,0.89,2.58,0.38,2.5,0.39,3.49,3.36,28.1,69.4,17,113,52.9,18.9,0.8,2.6,0.2,0.3,<0.5,0.29,1,3.8,1740,70.5,2.23,3.62,0.38,0.18,466,506,0.03,0.5,3.34,2.84,108,1,5,
"Kabanov et al., 2015, GSC OF7948",well,Little Bear N-09,300N096500126300,96E,64.982154,-126.5236909,Canol,Vermillion Creek,Core,1740.5,N09-1740.5,,76.21,7.22,2.8,0.75,1.05,0.55,1.47,0.35,0.06,0.01,0.007,89,8,8.7,99.24,6051,0.6051,4,10.2,2.5,8,1.8,5.5,56.5,<1,166.4,0.5,4.7,16,185,0.9,67.5,19.8,18.9,34.3,4.27,16.4,3.33,0.74,3.33,0.53,2.98,0.65,1.74,0.23,1.57,0.25,4.2,2.11,26.9,37.8,9.7,134,66.3,11.4,0.9,1.9,0.1,0.2,<0.5,0.18,1.4,3.3,1740.5,70.9,4.76,5.01,0.49,0.29,458,498,0.04,0.83,4.03,3.2,124,1,7,
"Kabanov et al., 2015, GSC OF7948",well,Little Bear N-09,300N096500126300,96E,64.982154,-126.5236909,Canol,Vermillion Creek,Core,1741,N09-1741,,72.07,8.63,4.47,0.65,0.5,0.71,1.7,0.48,0.07,0.02,0.008,119,8,10.1,99.4,4297,0.4297,3,16.9,3.8,10,2.7,8,73.8,2,164,0.6,5.8,10.9,208,0.9,96.6,20.6,24.6,44.4,5.6,22.1,3.77,0.69,3.54,0.49,3.27,0.68,1.7,0.25,1.83,0.26,4.56,3.57,42.4,58.4,13.9,210,96.5,18.4,1.3,2.3,0.2,0.3,<0.5,0.25,2.4,5.2,1741,70.3,3.88,5.05,0.43,0.24,457,497,0.05,0.76,4.42,3.66,114,1,5,
"Kabanov et al., 2015, GSC OF7948",well,Little Bear N-09,300N096500126300,96E,64.982154,-126.5236909,Canol,Vermillion Creek,Core,1741.5,N09-1741.5,,75.26,8.59,2.68,0.61,0.42,0.73,1.72,0.35,0.06,0.01,0.007,64,7,9,99.39,4699,0.4699,4,15.8,3.3,10.3,2.1,6.7,71.8,2,174.7,0.4,7,11.5,119,0.7,79.2,16.4,20.5,38.4,4.51,17.5,3.27,0.49,2.8,0.42,2.34,0.49,1.41,0.23,1.47,0.22,4.14,1.96,26.6,51.9,11.3,88,52.4,11.1,0.6,1.2,0.2,0.2,<0.5,0.21,0.5,2.8,1741.5,70.9,3.66,4.13,0.47,0.2,464,504,0.06,0.67,4.05,3.38,102,1,5,
"Kabanov et al., 2015, GSC OF7948",well,Little Bear N-09,300N096500126300,96E,64.982154,-126.5236909,Canol,Vermillion Creek,Core,1742,N09-1742,,63.1,15.46,4.58,0.87,0.3,0.75,2.35,0.45,0.08,0.04,0.007,50,14,11.5,99.46,3887,0.3887,1,16.5,5.2,19,3.2,7.7,98,3,187.8,0.8,13.3,14.6,132,0.5,94.2,19.5,46.5,93.7,10.66,39.8,6.71,1.05,4.59,0.61,3.37,0.63,1.74,0.29,1.83,0.29,3.43,3.57,39.9,55.2,31.7,77,48.5,16.7,0.7,1,0.4,0.3,0.8,0.27,0.8,3.8,1742,70.8,2.81,4.13,0.4,0.12,464,504,0.03,0.59,4.09,3.5,101,1,3,
"Kabanov et al., 2015, GSC OF7948",well,Little Bear N-09,300N096500126300,96E,64.982154,-126.5236909,Canol,Vermillion Creek,Core,1742.5,N09-1742.5,,72.91,8.44,3.84,0.69,0.64,0.61,1.74,0.41,0.08,0.01,0.007,123,8,10.1,99.47,3763,0.3763,2,20.1,4,11.5,2.3,7.6,78.9,2,148.3,0.4,5.8,16.1,181,0.7,93.6,21.8,23.8,44.6,5.38,20.6,4.13,0.78,3.82,0.56,3.17,0.63,1.89,0.28,1.81,0.29,4.63,2.92,44.1,61.6,14.4,190,102.4,18.2,1.5,1.8,0.2,0.3,<0.5,0.31,1.5,4.7,1742.5,70.5,5,6.31,0.44,0.29,454,494,0.07,0.96,4.65,3.69,136,2,6,
"Kabanov et al., 2015, GSC OF7948",well,Little Bear N-09,300N096500126300,96E,64.982154,-126.5236909,Canol,Vermillion Creek,Core,1743,N09-1743,,64.29,11.62,6.31,1.1,0.96,0.72,2.49,0.53,0.07,0.02,0.01,77,12,11.4,99.54,2992,0.2992,5,28.2,5.3,15.8,3,9.3,110.6,2,175.8,0.6,8,14,182,0.9,115.9,23.5,30.3,56.5,6.63,25.4,4.6,0.83,3.74,0.6,3.53,0.71,2.16,0.32,2.15,0.36,3.62,4.87,29.3,83.2,20.8,158,67.8,23.3,1.1,2.3,0.2,0.4,1.3,0.36,1.1,9.4,1743,70.3,2.35,3.13,0.43,0.2,461,501,0.03,0.47,3.45,2.98,91,1,6,
"Kabanov et al., 2015, GSC OF7948",well,Little Bear N-09,300N096500126300,96E,64.982154,-126.5236909,Canol,Vermillion Creek,Core,1743.5,N09-1743.5,,67.86,10.28,3.98,1.26,1.65,0.77,2.17,0.51,0.09,0.02,0.009,88,11,10.9,99.49,3383,0.3383,6,24.8,4.1,13.3,2.7,9.3,92.1,2,198.9,0.6,7.8,12.7,190,0.7,109.3,25,28.2,53.6,6.21,24.3,4.43,0.89,4.17,0.65,3.78,0.76,2.17,0.33,2.2,0.31,4.65,2.85,28.8,75.6,17.2,162,74.4,17.5,1.4,2.4,0.2,0.4,<0.5,0.28,1,4.9,1743.5,70.7,4.1,4.41,0.48,0.23,464,504,0.05,0.73,4.28,3.55,103,1,5,
"Kabanov et al., 2015, GSC OF7948",well,Little Bear N-09,300N096500126300,96E,64.982154,-126.5236909,Canol,Vermillion Creek,Core,1744,N09-1744,,70.44,8.73,4.09,1.03,1.32,0.68,1.85,0.48,0.08,0.02,0.008,89,9,10.6,99.34,4855,0.4855,2,25.3,3.5,11.2,2.5,8.6,78.6,2,190.1,0.6,6.4,11.6,135,1,105,21.3,23.5,46.1,5.39,20.8,3.92,0.68,3.8,0.61,3.37,0.69,1.89,0.29,1.88,0.28,4.65,3.06,37.5,58.9,15.7,118,73.6,15.4,0.8,1.9,0.2,0.4,<0.5,0.32,1.7,4.4,1744,70.8,5.16,5.55,0.48,0.32,457,497,0.08,0.91,4.7,3.79,118,2,7,
"Kabanov et al., 2015, GSC OF7948",well,Little Bear N-09,300N096500126300,96E,64.982154,-126.5236909,Canol,Vermillion Creek,Core,1744.5,N09-1744.5,,62.45,11.23,7.83,1.12,0.97,0.82,2.31,0.61,0.08,0.03,0.01,79,12,12.1,99.52,3222,0.3222,2,35.2,4.1,14,3.6,10.1,97.9,2,183.5,0.5,8.3,11,156,0.9,132.6,24.8,31.9,63.3,7.56,28.9,5.36,0.94,4.54,0.7,4.02,0.82,2.4,0.35,2.33,0.36,3.86,6.26,36.9,80.7,23.3,143,69.6,26.2,1.1,2.9,0.3,0.5,<0.5,0.41,1.7,9.8,1744.5,70.4,2.11,2.27,0.48,0.15,450,490,0.04,0.38,3.13,2.75,73,1,5,
"Kabanov et al., 2015, GSC OF7948",well,Little Bear N-09,300N096500126300,96E,64.982154,-126.5236909,Canol,Vermillion Creek,Core,1745,N09-1745,,59.64,6.7,2.75,0.7,4.62,0.72,1.29,0.35,0.05,0.01,0.005,70,9,12.8,89.67,>50000,#VALUE!,<1,20.6,2.4,7.7,2.5,6.2,52.3,1,1310.8,0.5,5.4,10.3,118,0.6,80.9,21,18.7,36.8,4.36,17,3.62,<0.02,4.37,0.61,3.38,0.64,1.8,0.28,1.85,0.25,4.97,2.09,24.1,45.1,12.9,92,56.7,13,0.8,1.3,0.1,0.3,<0.5,0.23,1.1,3.8,1745,70.6,2.45,2.34,0.51,0.34,465,505,0.04,0.42,2.95,2.53,79,1,12,
"Kabanov et al., 2015, GSC OF7948",well,Little Bear N-09,300N096500126300,96E,64.982154,-126.5236909,Canol,Vermillion Creek,Core,1745.5,N09-1745.5,,70.97,8.12,3.38,1.02,1.71,0.66,1.52,0.48,0.07,0.02,0.006,71,10,9.9,97.87,18004,1.8004,1,23.6,3.3,9.6,2.6,7.3,65.5,2,404.6,0.4,5.4,10.4,129,0.7,94.2,20,20.1,39.2,4.56,18,3.56,0.55,3.72,0.58,3.11,0.66,1.97,0.26,1.67,0.28,3.95,2.64,27,56.2,16.2,94,57.9,14.7,0.7,1.4,0.2,0.3,0.8,0.25,1.3,4.5,1745.5,70.7,4.18,3.22,0.57,0.34,462,502,0.05,0.63,3.63,3,89,1,9,
"Kabanov et al., 2015, GSC OF7948",well,Little Bear N-09,300N096500126300,96E,64.982154,-126.5236909,Canol,Vermillion Creek,Core,1746,N09-1746,,58.41,10.52,10.69,1.1,1.74,0.7,2.06,0.61,0.07,0.03,0.01,116,10,13.5,99.45,3762,0.3762,4,31.9,4.2,12.5,3,9.5,86.4,1,192.6,0.6,8,13.6,199,0.9,116.9,20.9,26.1,51.1,5.99,22.1,4.07,0.76,3.7,0.56,3.19,0.66,1.89,0.31,1.92,0.31,3.92,8.37,48.4,73.3,23,105,105.3,30.8,1.1,2.7,0.4,0.4,0.6,0.4,2.8,13.5,1746,71,2.28,1.86,0.55,0.26,438,478,0.04,0.37,2.43,2.06,77,2,11,
"Kabanov et al., 2015, GSC OF7948",well,Little Bear N-09,300N096500126300,96E,64.982154,-126.5236909,Canol,Vermillion Creek,Core,1746.5,N09-1746.5,,69.24,7.78,3.88,1.22,2.98,0.62,1.55,0.42,0.08,0.02,0.008,121,9,11.3,99.11,6670,0.667,4,22.5,3.2,8.9,2.5,6.4,64.4,1,284.9,0.4,5.5,12,208,0.8,92.6,22,23.2,43.9,5.15,20.4,3.85,0.66,3.63,0.56,3.44,0.69,1.78,0.28,1.77,0.28,5.03,2.89,27.2,61.3,16.3,231,97.9,15.3,2.6,2.2,0.3,0.3,<0.5,0.25,2.2,5.8,1746.5,70.2,5.89,5.05,0.54,0.37,451,491,0.06,0.93,4.49,3.56,112,1,8,
"Kabanov et al., 2015, GSC OF7948",well,Little Bear N-09,300N096500126300,96E,64.982154,-126.5236909,Canol,Vermillion Creek,Core,1747,N09-1747,,64.91,9.61,5.58,1.08,2.5,0.7,2.04,0.52,0.09,0.02,0.01,141,10,12.4,99.47,3388,0.3388,1,29.7,4,11.7,2.9,8.7,86.2,2,218,0.5,7.4,11.5,249,0.9,113.4,23.5,26.5,50.6,6,22,4.13,0.78,3.89,0.58,3.54,0.73,2.04,0.31,1.95,0.31,4.61,4.2,34.8,79.1,21.8,245,120.8,27.1,3.1,3.7,0.3,0.4,<0.5,0.29,3,8.9,1747,70.4,3.61,4.5,0.45,0.28,461,501,0.05,0.69,4.34,3.65,104,1,6,
"Kabanov et al., 2015, GSC OF7948",well,Little Bear N-09,300N096500126300,96E,64.982154,-126.5236909,Canol,Vermillion Creek,Core,1747.5,N09-1747.5,,68.49,8.77,4.72,0.77,2.3,0.66,1.83,0.49,0.1,0.01,0.009,139,8,11.3,99.46,3614,0.3614,<1,32.6,3.7,10.2,3.1,8.6,79,2,203.4,0.5,7.3,18.9,235,0.9,112,26.2,29.1,56.8,6.75,27,5.28,1.07,5.07,0.75,4.22,0.87,2.28,0.34,2,0.33,4.85,3.51,33.5,81.7,22.5,183,121.6,21.8,2.6,3.3,0.3,0.4,<0.5,0.31,2.7,8.7,1747.5,70.5,4.02,4.98,0.45,0.23,458,498,0.03,0.77,4.65,3.88,107,1,5,
"Kabanov et al., 2015, GSC OF7948",well,Little Bear N-09,300N096500126300,96E,64.982154,-126.5236909,Canol,Vermillion Creek,Core,1748,N09-1748,,63.96,11.64,4.97,0.93,2.33,0.67,2.39,0.58,0.09,0.02,0.011,136,11,11.9,99.46,3559,0.3559,3,35.2,5.4,14.6,3.3,9.5,108.8,2,186.3,0.6,9,14.4,234,1.1,123.6,24.4,32.8,62.6,7.37,27.8,4.99,0.97,4.33,0.67,3.94,0.79,2.33,0.34,2.19,0.34,4.46,3.52,31,81.2,22.5,190,111.6,23.9,2.5,2.4,0.4,0.4,<0.5,0.31,1.7,7.2,1748,70.5,3.7,4.67,0.44,0.33,458,498,0.05,0.72,4.22,3.5,111,1,8,
"Kabanov et al., 2015, GSC OF7948",well,Little Bear N-09,300N096500126300,96E,64.982154,-126.5236909,Canol,Vermillion Creek,Core,1748.5,N09-1748.5,,67.75,10.47,4.17,0.8,2.09,0.66,2.22,0.56,0.08,0.01,0.01,120,10,10.6,99.47,3443,0.3443,4,28.4,4.9,12.8,3.2,9.1,99.7,2,175.3,0.5,8.3,11.3,264,1,122.9,22.2,29.2,57.9,6.69,25.4,4.72,0.91,4.16,0.61,3.54,0.69,2.03,0.32,2.1,0.32,4.29,2.97,28.7,73.8,19.6,241,107,20.7,2.9,2.1,0.4,0.4,<0.5,0.21,1.2,7.3,1748.5,70.9,3.41,4.03,0.46,0.25,460,500,0.04,0.64,3.95,3.31,102,1,6,
"Kabanov et al., 2015, GSC OF7948",well,Little Bear N-09,300N096500126300,96E,64.982154,-126.5236909,Canol,Vermillion Creek,Core,1749,N09-1749,,58.99,10,4.7,2.67,5.43,0.64,2.03,0.49,0.14,0.04,0.009,99,11,14.3,99.45,3489,0.3489,<1,23.4,4.5,11.9,2.4,7.3,89.9,2,351.1,0.6,6.8,11.2,161,0.6,92.1,23.1,27.2,51.8,6.17,24.3,4.22,0.83,4.22,0.65,3.53,0.73,1.93,0.3,1.93,0.3,5.32,2.62,22.9,57.7,16.2,125,73.9,15.5,1.4,1.6,0.3,0.3,<0.5,0.16,0.8,5.1,1749,70.8,4.08,4.39,0.48,0.25,460,500,0.05,0.72,3.84,3.12,114,1,7,
"Kabanov et al., 2015, GSC OF7948",well,Little Bear N-09,300N096500126300,96E,64.982154,-126.5236909,Canol,Vermillion Creek,Core,1749.7,N09-1749.7,,66.01,10.8,4.11,1.47,1.98,0.67,2.2,0.54,0.08,0.02,0.01,112,15,11.6,99.49,3353,0.3353,4,28.9,4.7,12.6,3.1,8.8,97.9,2,219.3,0.7,7.6,13.4,191,1,108.3,20.9,27.3,51.1,6.11,22.4,4.04,0.78,3.72,0.59,3.31,0.7,2.05,0.3,2.21,0.31,4.75,2.72,32.5,61.8,17,145,86.8,15.3,1.7,1.9,0.3,0.3,<0.5,0.19,1.2,5.6,1749.7,70.4,3.22,5.34,0.38,0.13,463,503,0.02,0.73,4.28,3.55,125,0,3,
"Kabanov et al., 2015, GSC OF7948",well,Little Bear N-09,300N096500126300,96E,64.982154,-126.5236909,Canol,Vermillion Creek,Core,1750,N09-1750,,69.89,9.52,3.87,0.65,1.5,0.61,1.95,0.5,0.09,0.01,0.009,126,10,10.9,99.48,3577,0.3577,2,28.5,4.2,11.7,2.8,8.1,85.5,2,166.4,0.5,7.3,13,218,0.7,105.6,20.5,26,50.8,5.96,21.9,4.19,0.84,4.05,0.59,3.14,0.66,1.96,0.27,1.83,0.29,4.76,2.8,30.6,65,16.8,194,100.8,20.2,2.1,2.4,0.3,0.3,0.8,0.21,1.7,7.6,1750,70.8,4.25,5.56,0.43,0.18,457,497,0.02,0.83,4.59,3.76,121,0,4,
"Kabanov et al., 2015, GSC OF7948",well,Little Bear N-09,300N096500126300,96E,64.982154,-126.5236909,Canol,Vermillion Creek,Core,1750.5,N09-1750.5,,70.12,8.81,3.18,0.59,2.19,0.6,1.68,0.44,0.07,0.01,0.008,112,10,10.3,98.01,16674,1.6674,<1,22,3.7,9.7,2.5,6.9,74.6,2,353.2,0.5,6.1,10.4,188,1,89.6,19.9,22.8,43.8,5.05,19.9,3.78,0.54,3.88,0.55,3.28,0.61,1.78,0.25,1.65,0.26,4.69,2.3,26.1,71.3,15.7,183,88.4,15.9,1.9,2,0.3,0.3,<0.5,0.16,1.6,5.9,1750.5,70.2,4.96,5.6,0.47,0.27,448,488,0.04,0.89,4.34,3.45,129,1,6,
"Kabanov et al., 2015, GSC OF7948",well,Little Bear N-09,300N096500126300,96E,64.982154,-126.5236909,Canol,Vermillion Creek,Core,1751,N09-1751,,65.61,10.28,4.16,0.92,2.86,0.62,2.07,0.49,0.09,0.01,0.01,116,10,12.2,99.34,4597,0.4597,<1,25.9,4.4,12.4,2.6,7.7,91.3,2,212.4,0.4,7.4,14.6,201,1.2,94.9,22.7,27.4,50.1,6.14,24.3,4.31,1.05,4.28,0.61,3.26,0.72,2.14,0.33,1.89,0.29,4.99,2.94,33.2,76.5,19.6,187,94.5,17.4,2.3,2.3,0.3,0.3,<0.5,0.16,1.3,7.4,1751,70.5,2.92,5.08,0.37,0.27,465,505,0.04,0.68,4.62,3.94,110,1,6,
"Kabanov et al., 2015, GSC OF7948",well,Little Bear N-09,300N096500126300,96E,64.982154,-126.5236909,Canol,Vermillion Creek,Core,1751.5,N09-1751.5,,67.45,10.23,4.4,1.03,1.77,0.65,2.11,0.53,0.09,0.02,0.011,132,11,10.9,99.24,5570,0.557,2,34.8,4.8,12.7,2.9,8.9,92.1,2,213.1,0.7,7.7,17.2,219,1.3,116.5,24.4,28.8,54.3,6.24,24.8,5.01,0.82,4.47,0.65,3.81,0.73,2.11,0.31,2.05,0.29,4.77,3.13,36,72,20,189,109.5,19.6,2.4,2.6,0.4,0.4,1.5,0.22,1.4,8.2,1751.5,70.3,3.13,4.98,0.39,0.16,462,502,0.02,0.69,4.55,3.86,109,0,4,
"Kabanov et al., 2015, GSC OF7948",well,Little Bear N-09,300N096500126300,96E,64.982154,-126.5236909,Canol,Vermillion Creek,Core,1752,N09-1752.0,,68.12,10.84,4.14,0.69,1.16,0.66,2.16,0.55,0.09,0.01,0.01,133,10,10.9,99.31,5022,0.5022,<1,38.2,4.9,12.7,3.1,9.4,94.6,2,167,0.8,7.9,14.9,203,1.1,113.9,21.7,30,56.9,6.31,24.8,4.31,0.8,3.93,0.59,3.33,0.68,1.82,0.27,1.96,0.27,4.89,3.04,45.9,78.7,21.8,215,112,19.3,2.7,2.8,0.4,0.4,1.8,0.23,1.4,6.3,1752,70.8,3.39,4.81,0.41,0.43,459,499,0.07,0.71,4.13,3.42,116,2,10,
"Kabanov et al., 2015, GSC OF7948",well,Little Bear N-09,300N096500126300,96E,64.982154,-126.5236909,Canol,Vermillion Creek,Core,1752.5,N09-1752.5,,59.46,9.41,3.99,1.78,4.98,0.69,1.86,0.46,0.08,0.03,0.009,89,13,13,95.71,36522,3.6522,2,27,3.8,11,2.3,7.3,79.5,2,872.3,0.5,6.3,10.7,159,1.2,95.7,28,25.9,47.7,5.33,21,4.01,<0.02,4.14,0.6,3.69,0.75,2.28,0.36,2.31,0.37,5.63,2.62,21.8,63.8,15.1,136,65.9,12.8,1.6,1.4,0.3,0.3,0.8,0.15,0.7,4.7,1752.5,70.6,3.02,5,0.38,0.18,463,503,0.03,0.68,4.8,4.12,104,1,4,
"Kabanov et al., 2015, GSC OF7948",well,Little Bear N-09,300N096500126300,96E,64.982154,-126.5236909,Canol,Vermillion Creek,Core,1753,N09-1753,,47.63,7.82,5.85,5.17,10.48,0.64,1.53,0.38,0.12,0.08,0.007,73,8,19.4,99.15,5597,0.5597,3,24.2,3.3,9.3,2,6.5,66.6,1,681.6,0.3,5.3,10.8,131,0.6,78.3,22,23,41.1,4.88,18.9,3.35,0.52,3.33,0.49,2.98,0.63,1.82,0.28,1.81,0.27,7.33,2.37,25,48.2,14.2,102,65.9,23.9,1.6,2.6,0.3,0.3,1.7,0.15,1.5,7.5,1753,70.4,2.73,3.89,0.41,0.32,462,502,0.02,0.57,3.91,3.34,99,1,8,
"Kabanov et al., 2015, GSC OF7948",well,Little Bear N-09,300N096500126300,96E,64.982154,-126.5236909,Canol,Vermillion Creek,Core,1753.5,N09-1753.5,,68.48,11.06,4.26,0.66,0.29,0.69,2.26,0.56,0.08,<0.01,0.012,128,10,11.1,99.49,3433,0.3433,4,42,5.4,13.7,2.9,9.7,99.5,2,127.1,0.7,8.3,16.1,180,1.6,114,20.6,29.8,56.3,6.76,25,4.78,0.81,4.17,0.6,3.46,0.71,2.01,0.3,1.96,0.29,5,3.01,49.9,85.3,21,181,95.9,19.1,2,2.5,0.5,0.4,1.1,0.23,1.3,5.9,1753.5,70.8,3.35,5.74,0.37,0.15,463,503,0.04,0.77,5.23,4.46,110,1,3,
"Kabanov et al., 2015, GSC OF7948",well,Little Bear N-09,300N096500126300,96E,64.982154,-126.5236909,Canol,Vermillion Creek,Core,1754,N09-1754,,68.17,11.36,4.72,0.75,0.42,0.66,2.31,0.58,0.09,0.01,0.01,137,11,10.4,99.52,3117,0.3117,3,38.8,5.4,14.6,2.9,10,103.8,2,134,0.9,7.6,16.5,238,1.3,115.6,23.5,30.4,57.3,6.84,25.1,4.82,0.91,4.54,0.65,3.82,0.79,2.14,0.33,2.01,0.31,4.6,3.33,43.1,92.5,24.1,196,112.9,19.8,2.5,3.1,0.4,0.4,2.3,0.25,2.1,7.2,1754,70.1,3.68,5.23,0.41,0.23,460,500,0.18,0.76,4.71,3.95,111,4,5,
"Kabanov et al., 2015, GSC OF7948",well,Little Bear N-09,300N096500126300,96E,64.982154,-126.5236909,Canol,Vermillion Creek,Core,1754.5,N09-1754.5,,62.09,14.26,4.88,1.4,1.58,0.77,2.58,0.7,0.07,0.02,0.01,91,13,11.1,99.48,3371,0.3371,3,33.1,5.8,17.2,2.9,9.7,115.9,2,201.7,0.7,8.6,11.1,210,1.9,107,21.5,28.9,54.9,6.37,23.4,4.28,0.81,4.08,0.61,3.46,0.74,1.96,0.33,1.98,0.32,4.17,3.03,30.7,77.7,22.5,146,76.6,18.2,1.9,2.5,0.4,0.3,0.9,0.21,1.6,8.4,1754.5,70.9,1.99,3.18,0.38,0.14,462,502,0.02,0.44,3.46,3.02,92,1,4,
"Kabanov et al., 2015, GSC OF7948",well,Little Bear N-09,300N096500126300,96E,64.982154,-126.5236909,Canol,Vermillion Creek,Core,1755,N09-1755,,41.15,7.36,6.35,6.47,13.33,0.56,1.41,0.35,0.08,0.1,0.008,71,7,21.9,99.07,5928,0.5928,<1,23.7,3.2,8.6,1.8,5.9,62.7,1,816.8,0.3,5.2,9,110,0.7,75.1,16.9,20.5,35.4,4.19,16.5,3.1,0.39,2.84,0.41,2.39,0.49,1.57,0.22,1.38,0.22,8.02,2.16,23.5,47,13.9,73,50.3,14.7,0.9,1.6,0.2,0.2,0.6,0.14,0.8,4.7,1755,70.8,2.15,3.41,0.39,0.31,462,502,0.11,0.48,3.32,2.84,103,3,9,
"Kabanov et al., 2015, GSC OF7948",well,Little Bear N-09,300N096500126300,96E,64.982154,-126.5236909,Canol,Vermillion Creek,Core,1755.5,N09-1755.5,,68.07,12.26,3.82,0.74,0.35,0.69,2.44,0.61,0.08,<0.01,0.011,111,11,10.4,99.52,3146,0.3146,4,36.7,6.2,14.1,3.3,10.5,107,2,138.2,0.8,8.3,17.5,208,1.2,123.4,21.4,31.8,61.6,7.05,28.1,5.16,0.83,4.22,0.65,3.51,0.72,2.13,0.32,2.02,0.31,5.14,2.69,41.9,94.9,19.8,194,93.8,16.1,2.6,2.5,0.4,0.4,0.8,0.2,1.3,6.2,1755.5,70.6,3.4,6.04,0.36,0.24,464,504,0.03,0.8,5.1,4.3,118,1,5,
"Kabanov et al., 2015, GSC OF7948",well,Little Bear N-09,300N096500126300,96E,64.982154,-126.5236909,Canol,Vermillion Creek,Core,1756,N09-1756,,66.68,10.53,4.48,0.72,1.34,0.71,2.18,0.58,0.08,<0.01,0.01,123,9,12.2,99.56,2719,0.2719,4,44.3,4.6,12.4,3.4,9.5,94.8,2,159.8,0.8,8.3,16.1,218,1.3,132.8,21.7,30.3,56.9,6.59,26.2,4.63,0.77,3.8,0.63,3.76,0.78,2.06,0.31,2.17,0.33,5.63,3.19,51.7,64.7,14.4,136,108.1,13.3,1.6,3.2,0.3,0.3,0.9,0.31,2.6,6.5,1756,70.2,3.13,5.56,0.36,0.2,467,507,0.04,0.74,5.74,5,97,1,3,
"Kabanov et al., 2015, GSC OF7948",well,Little Bear N-09,300N096500126300,96E,64.982154,-126.5236909,Canol,Vermillion Creek,Core,1756.5,N09-1756.5,,61.8,10.66,4.23,1.37,4.22,0.77,2.18,0.54,0.11,0.02,0.01,100,12,13.3,99.19,5746,0.5746,4,41.7,4.5,13.1,2.6,9.5,94.7,2,313,0.8,7.7,19.6,188,1.5,111.2,27.2,32,60.2,6.77,27.8,5.16,0.8,5.05,0.73,3.93,0.84,2.45,0.35,2.3,0.36,6.65,2.84,39.7,88.2,19.8,152,77.4,13.9,2.1,2.5,0.4,0.4,1,0.24,1.1,7,1756.5,70.8,3.45,6.36,0.35,0.32,466,506,0.04,0.84,5.85,5.01,109,1,5,
"Kabanov et al., 2015, GSC OF7948",well,Little Bear N-09,300N096500126300,96E,64.982154,-126.5236909,Canol,Vermillion Creek,Core,1757,N09-1757,,67.51,10.6,4.09,0.74,1.04,0.67,2.18,0.54,0.12,0.01,0.01,135,11,12,99.47,3540,0.354,2,33.7,5.2,12.6,2.9,9.3,97.6,2,156.3,0.7,7.1,24.6,221,1.4,114.3,26.4,30.4,54.3,6.75,25.9,5.01,0.89,4.72,0.7,4.08,0.81,2.23,0.32,2.17,0.34,6.24,2.82,50.5,70.5,18.8,173,97.1,11.2,2,2.7,0.4,0.3,1.1,0.21,1.6,10.4,1757,70.2,4.28,7.42,0.37,0.25,465,505,0.06,0.99,6.38,5.39,116,1,4,
"Kabanov et al., 2015, GSC OF7948",well,Little Bear N-09,300N096500126300,96E,64.982154,-126.5236909,Canol,Vermillion Creek,Core,1757.5,N09-1757.5,,62.58,12.32,5.04,0.93,1.53,0.75,2.5,0.58,0.09,0.01,0.012,104,12,13.2,99.51,2520,0.252,2,46.8,6.1,15,3.1,10.1,111.1,2,168.7,0.9,7.8,21.5,213,1.6,112.4,23.9,32.1,58.1,7.15,26.6,5.2,0.92,4.6,0.66,3.84,0.75,1.97,0.33,2.09,0.31,6.33,3.7,59.9,105.8,25.7,715,86.5,24.7,7,3.3,0.5,0.6,1.1,0.37,1.3,10.9,1757.5,70.5,3.11,6.62,0.32,0.26,467,507,0.04,0.83,6.27,5.44,106,1,4,
"Kabanov et al., 2015, GSC OF7948",well,Little Bear N-09,300N096500126300,96E,64.982154,-126.5236909,Canol,Vermillion Creek,Core,1758,N09-1758,,65.91,10.73,4.34,0.73,0.95,0.66,2.24,0.51,0.11,0.01,0.01,150,11,13.4,99.58,2601,0.2601,3,34.1,5.5,13,2.8,8.8,100.8,1,143.9,0.6,7.2,36.4,218,1.8,106.2,26.3,28.9,56.4,6.88,29.4,5.28,1.04,4.95,0.72,4.15,0.81,2.28,0.34,2.11,0.35,7.2,3.06,82.1,86.3,18.9,149,108.3,15.3,3.2,3.8,0.4,0.4,0.5,0.25,1.5,11.7,1758,70.6,2.69,7.41,0.27,0.18,469,509,0.04,0.86,7.35,6.49,101,1,2,
"Kabanov et al., 2015, GSC OF7948",well,Little Bear N-09,300N096500126300,96E,64.982154,-126.5236909,Canol,Vermillion Creek,Core,1758.5,N09-1758.5,,58.4,8.72,4.27,2.66,6.54,0.74,1.71,0.42,0.2,0.05,0.008,107,12,14.8,98.5,11604,1.1604,3,25,3.6,10,2.3,7.8,72.6,2,553.9,0.5,6.1,24.2,199,1.3,89.1,46.3,35.4,60.6,7.03,28.7,5.7,1.03,6.45,0.94,5.9,1.23,3.55,0.48,3.15,0.5,6.76,2.99,29.9,74.9,15.8,154,90.3,14.6,2.6,2.7,0.4,0.5,0.5,0.3,1,6,1758.5,70.5,3.58,5.47,0.4,0.44,465,505,0.06,0.78,5.33,4.55,103,1,8,
"Kabanov et al., 2015, GSC OF7948",well,Little Bear N-09,300N096500126300,96E,64.982154,-126.5236909,Canol,Vermillion Creek,Core,1759,N09-1759,,71.19,8.2,4.03,0.66,1.32,0.7,1.68,0.45,0.1,<0.01,0.008,162,8,10.9,99.22,5712,0.5712,2,31.3,3.4,9.8,2.7,8,70.9,1,218.1,0.6,6.1,20.7,254,1.2,100.2,27.4,26.6,45.4,5.75,22.6,4.78,0.77,4.63,0.7,4.15,0.83,2.19,0.32,1.97,0.29,5.7,3.23,39.7,79.2,19.2,239,138.8,19.9,3,3.8,0.3,0.4,0.8,0.37,2.6,7.2,1759,70.3,3.83,6.03,0.39,0.27,461,501,0.04,0.83,5.57,4.74,108,1,5,
"Kabanov et al., 2015, GSC OF7948",well,Little Bear N-09,300N096500126300,96E,64.982154,-126.5236909,Canol,Vermillion Creek,Core,1759.5,N09-1759.5,,54.97,8.49,4.54,3.77,7.28,0.89,1.67,0.43,0.07,0.09,0.007,63,11,16.2,98.4,12274,1.2274,<1,24.3,3.1,11,2.4,8.3,71.6,1,763.4,0.5,6.5,13.1,169,1.4,94.7,30.5,29.8,47.8,5.73,21.6,4.02,0.58,4.07,0.62,3.65,0.82,2.52,0.37,2.58,0.4,6.38,3.19,30.6,58.3,13.6,85,52.9,13.1,1,1.9,0.3,0.3,<0.5,0.33,1,4.7,1759.5,70.7,2.8,3.92,0.42,0.38,463,503,0.03,0.58,4.2,3.62,93,1,9,
"Kabanov et al., 2015, GSC OF7948",well,Little Bear N-09,300N096500126300,96E,64.982154,-126.5236909,Canol,Vermillion Creek,Core,1760,N09-1760,,65.82,10.69,4.56,1.06,1.47,0.86,2.2,0.58,0.08,0.02,0.012,81,12,12.2,99.52,3063,0.3063,4,37.4,4.3,13.4,3.3,10.5,90.4,1,191.2,0.6,7.7,16.9,200,1,117,24.5,30.3,56.5,6.61,25,4.7,0.85,4.31,0.65,3.91,0.85,2.31,0.36,2.33,0.36,5.53,3.48,47.3,85.6,19.7,119,72.6,18.6,1.3,2.5,0.3,0.5,<0.5,0.42,1.6,6.5,1760,70.4,3.05,5.6,0.35,0.21,467,507,0.02,0.74,5.41,4.67,104,0,4,
"Kabanov et al., 2015, GSC OF7948",well,Little Bear N-09,300N096500126300,96E,64.982154,-126.5236909,Canol,Vermillion Creek,Core,1760.5,N09-1760.5,,72.38,8,3.67,0.66,0.99,0.67,1.67,0.41,0.08,0.01,0.007,117,7,11,99.56,2991,0.2991,1,27.6,3.2,9.6,2,6.7,70.1,1,139.2,0.4,5,17.4,188,0.9,77.1,19.2,21.3,39.1,5.07,18.8,3.44,0.65,3.22,0.46,2.81,0.51,1.57,0.22,1.46,0.24,5.74,2.86,47.1,74.1,17.1,125,96,17,1.5,2.5,0.3,0.3,<0.5,0.39,2.3,6.2,1760.5,71,4.58,6.67,0.41,0.24,461,501,0.05,0.95,5.77,4.82,116,1,4,
"Kabanov et al., 2015, GSC OF7948",well,Little Bear N-09,300N096500126300,96E,64.982154,-126.5236909,Canol,Vermillion Creek,Core,1761,N09-1761,,73.79,7.21,3.2,0.56,0.94,0.64,1.5,0.36,0.08,<0.01,0.008,138,6,11.2,99.49,3628,0.3628,4,24,2.6,8.8,1.9,6.4,63.4,<1,132.8,0.4,4.7,23.3,208,0.8,75.3,16.1,20,34.4,4.65,17.9,3.1,0.61,3.21,0.46,2.6,0.43,1.39,0.2,1.38,0.21,6.24,2.43,45.2,90.1,22.5,145,99.2,18.7,2.4,3.2,0.5,0.5,1,0.26,1.3,7.9,1761,70.8,4.63,7.83,0.37,0.19,462,502,0.05,1.05,6.49,5.44,121,1,3,
"Kabanov et al., 2015, GSC OF7948",well,Little Bear N-09,300N096500126300,96E,64.982154,-126.5236909,Canol,Vermillion Creek,Core,1761.5,N09-1761.5,,63.24,12.31,5.42,0.81,0.9,0.88,2.49,0.63,0.21,0.02,0.012,160,11,12.6,99.49,2818,0.2818,4,32.1,5,17.9,3.1,10.6,111.3,2,188.7,0.6,8.3,42.1,388,1.4,117,54,41.5,69.6,9.32,34.2,7.03,1.47,7.67,1.15,7.36,1.34,3.91,0.55,3.35,0.54,5.24,4.14,77.3,118.2,27.7,222,143.7,29.5,2.9,5.7,0.4,0.6,2.2,0.39,2.9,10.8,1761.5,70.4,3.53,6.9,0.34,0.2,462,502,0.03,0.88,6.04,5.16,114,0,3,
"Kabanov et al., 2015, GSC OF7948",well,Little Bear N-09,300N096500126300,96E,64.982154,-126.5236909,Canol,Vermillion Creek,Core,1762,N09-1762,,68.85,7.92,4.43,0.83,2.21,0.68,1.65,0.43,0.11,0.01,0.008,161,8,12.2,99.39,4135,0.4135,5,33.4,3.7,9.9,2.2,7.6,70.3,1,239.6,0.7,5.9,25.5,249,1,90.2,26.2,26.1,46.6,6.1,22.8,4.61,0.9,4.58,0.67,3.71,0.72,2.03,0.29,1.83,0.31,5.92,3.42,50.5,89.5,23.5,216,136.9,28,2.6,4.7,0.4,0.6,2.4,0.39,3.5,9.7,1762,70.1,3.63,6.19,0.37,0.23,461,501,0.17,0.84,5.77,4.93,107,3,4,
"Kabanov et al., 2015, GSC OF7948",well,Little Bear N-09,300N096500126300,96E,64.982154,-126.5236909,Canol,Vermillion Creek,Core,1762.5,N09-1762.5,,71.98,7.89,3.3,0.64,1.32,0.67,1.68,0.42,0.08,0.01,0.009,163,7,11.4,99.47,3542,0.3542,2,25.2,3.6,10.4,2.3,7.6,71.5,1,160,0.5,5.7,14.5,270,0.9,85.6,18.5,23.9,38.5,5,17.7,3.06,0.54,3,0.45,2.58,0.57,1.68,0.25,1.67,0.24,6.15,2.51,53.2,71.3,14.8,235,127.8,15.4,2.6,3.1,0.3,0.3,0.7,0.2,1.6,5.4,1762.5,70.6,5.98,7.5,0.44,0.26,453,493,0.06,1.14,6.07,4.93,124,1,4,
"Kabanov et al., 2015, GSC OF7948",well,Little Bear N-09,300N096500126300,96E,64.982154,-126.5236909,Canol,Vermillion Creek,Core,1763,N09-1763,,61.39,12.05,6.82,0.75,1.14,0.87,2.27,0.65,0.08,0.01,0.011,199,8,13.3,99.39,3789,0.3789,5,32.2,4.1,16.1,2.8,9.9,98.1,2,159.3,0.7,9.7,17.6,498,1.2,107.5,17.5,28.1,50.8,6.66,24.8,4.05,0.62,3.49,0.51,3.03,0.59,1.58,0.26,1.52,0.26,5.66,5.29,73.8,115.1,26.9,232,172,35.4,3.1,6.2,0.4,0.6,1.2,0.3,2.6,10.8,1763,70.8,4.64,6.74,0.41,0.26,461,501,0.05,0.97,6.25,5.28,108,1,4,
"Kabanov et al., 2015, GSC OF7948",well,Little Bear N-09,300N096500126300,96E,64.982154,-126.5236909,Canol,Vermillion Creek,Core,1763.5,N09-1763.5,,73.43,7.38,3.3,0.62,1.65,0.6,1.5,0.38,0.06,<0.01,0.007,156,7,10.4,99.34,4806,0.4806,5,24.8,3.3,9.3,1.9,6,64.8,1,173.2,0.4,5.3,13.7,274,0.9,74.4,15.2,19.4,34.4,4.45,16.1,3.09,0.49,2.6,0.41,2.14,0.5,1.44,0.21,1.45,0.21,5.63,2.6,45.4,70.7,16.8,181,126.5,18.6,2.1,4.2,0.3,0.5,1.4,0.2,2.6,9,1763.5,70,4.56,6.39,0.42,0.26,455,495,0.05,0.93,5.37,4.44,119,1,5,
"Kabanov et al., 2015, GSC OF7948",well,Little Bear N-09,300N096500126300,96E,64.982154,-126.5236909,Canol,Vermillion Creek,Core,1764,N09-1764,,72.75,6.8,3.14,0.71,2.46,0.6,1.38,0.35,0.06,0.01,0.007,136,7,10.9,99.13,6457,0.6457,2,23.4,3.2,8.2,2,6.1,58.9,2,231,1.2,5.1,11.2,232,5.3,73.4,13.4,18.1,31.9,3.92,14.2,2.66,0.21,2.29,0.34,2.01,0.38,1.2,0.19,1.26,0.2,5.5,2.47,40.3,64.7,14.8,454,113.1,18.2,5.3,3.1,0.3,0.4,<0.5,0.19,1.6,6.3,1764,70.8,3.69,5.89,0.39,0.24,462,502,0.07,0.82,5.15,4.33,114,1,5,
"Kabanov et al., 2015, GSC OF7948",well,Little Bear N-09,300N096500126300,96E,64.982154,-126.5236909,Canol,Vermillion Creek,Core,1764.5,N09-1764.5,,67.17,11.06,4.47,0.69,0.84,0.75,2.19,0.55,0.08,0.01,0.011,173,8,11.6,99.48,3164,0.3164,2,33,8.2,15.5,2.8,9.2,94,2,146.1,0.5,7.8,15,398,1.8,100.7,16.4,26.1,45.7,5.67,20.6,3.37,0.53,2.78,0.43,2.4,0.5,1.58,0.24,1.5,0.25,4.91,3.39,90,86.5,26.3,226,142.9,32.4,3.2,6.1,0.4,0.8,0.7,0.37,2,17.3,1764.5,70.5,2.98,3.77,0.44,0.17,464,504,0.05,0.58,4.9,4.32,77,1,3,
"Kabanov et al., 2015, GSC OF7948",well,Little Bear N-09,300N096500126300,96E,64.982154,-126.5236909,Canol,Vermillion Creek,Core,1765,N09-1765,,70.73,7.61,3.3,0.88,2.73,0.65,1.56,0.39,0.12,0.02,0.008,143,8,11.5,99.55,2750,0.275,2,26.5,6.5,9.8,2.2,7.3,69.5,1,226.7,0.5,5,20.9,243,1.3,82.1,28,25,43.8,5.69,22.9,4.6,0.89,4.27,0.66,3.89,0.78,2.19,0.3,1.93,0.28,5.92,2.56,44.6,63.9,14.3,183,105.2,15.4,2.5,3.2,0.3,0.3,0.6,0.18,2.3,5.3,1765,70.2,3.49,4.89,0.42,0.24,464,504,0.04,0.71,5.46,4.75,90,1,4,
"Kabanov et al., 2015, GSC OF7948",well,Little Bear N-09,300N096500126300,96E,64.982154,-126.5236909,Canol,Vermillion Creek,Core,1765.5,N09-1765.5,,73.65,4.22,1.7,0.49,2.46,0.46,0.83,0.21,0.08,<0.01,0.004,114,4,12,96.16,33248,3.3248,4,15.7,1.8,4.5,1.2,3.7,34.8,<1,565.1,0.5,2.8,12.9,159,0.6,43,15.6,14.7,23.5,3.02,11.1,2.2,<0.02,2.37,0.32,2.1,0.39,1.25,0.17,1.04,0.18,6.9,1.35,36.3,33,7.6,87,71.2,7.8,1,1.7,0.2,0.2,<0.5,0.08,1.1,2.7,1765.5,70.3,5.61,6.64,0.46,0.33,467,507,0.06,1.04,6.39,5.35,104,1,5,
"Kabanov et al., 2015, GSC OF7948",well,Little Bear N-09,300N096500126300,96E,64.982154,-126.5236909,Canol,Vermillion Creek,Core,1766,N09-1766,,75.67,6.19,2.75,0.47,1.31,0.57,1.24,0.3,0.09,<0.01,0.007,146,6,10.7,99.37,4637,0.4637,2,20.8,2.3,7.4,1.7,5.3,52.8,1,167.4,0.3,4,18.9,233,<0.5,61.4,17.3,18.7,31.7,4.27,17,3.42,0.49,3.39,0.47,2.66,0.58,1.52,0.2,1.25,0.2,5.89,2.22,47.2,62.3,12.9,165,111.1,15.2,1.9,2.7,0.2,0.3,1.2,0.16,1.3,5.3,1766,70.6,4.36,5.39,0.45,0.25,465,505,0.05,0.82,5.71,4.89,94,1,4,
"Kabanov et al., 2015, GSC OF7948",well,Little Bear N-09,300N096500126300,96E,64.982154,-126.5236909,Canol,Vermillion Creek,Core,1766.5,N09-1766.5,,77.73,5.04,2.25,0.44,1.53,0.56,0.98,0.25,0.07,<0.01,0.005,107,5,9.6,98.46,12851,1.2851,<1,18.1,1.8,5.9,1.3,4.8,40.7,1,263.6,0.5,3.5,13.8,165,0.6,52.3,13.8,15.1,24.6,3.46,13.4,2.61,0.09,2.55,0.37,2.15,0.43,1.21,0.16,1.07,0.17,5.35,1.78,43.7,59.2,11,144,88.9,12.2,1.7,2.3,0.3,0.2,1.4,0.15,1.9,4.5,1766.5,70.2,5.71,4.61,0.55,0.3,466,506,0.04,0.88,5.14,4.26,90,1,6,
"Kabanov et al., 2015, GSC OF7948",well,Little Bear N-09,300N096500126300,96E,64.982154,-126.5236909,Canol,Vermillion Creek,Core,1767,N09-1767,,62.18,5.8,7.59,0.51,5.09,0.62,1.17,0.31,0.1,0.01,0.005,90,8,14,97.34,22733,2.2733,5,17.1,2,7.5,1.5,5.3,45.6,<1,461.5,0.4,4.2,19,141,0.9,61.5,22,20.5,33.5,4.38,17.8,3.25,0.17,3.5,0.5,3.06,0.61,1.68,0.27,1.71,0.26,5.78,6.29,49.9,74,18.4,112,72.2,26.6,1.5,4,0.2,0.3,1.1,0.38,2.4,29.9,1767,70.8,3.36,3.27,0.51,0.35,458,498,0.05,0.58,4.68,4.1,70,1,7,
"Kabanov et al., 2015, GSC OF7948",well,Little Bear N-09,300N096500126300,96E,64.982154,-126.5236909,Canol,Vermillion Creek,Core,1767.5,N09-1767.5,,72.38,7.01,3.72,0.55,1.7,0.66,1.39,0.37,0.11,<0.01,0.007,130,7,11.5,99.45,3926,0.3926,3,29.4,3,9,2.1,6.7,60.5,1,172.9,0.4,4.9,21.3,189,0.7,82.2,26.6,24.5,41.9,5.24,20.3,3.57,0.71,3.57,0.55,3.23,0.67,2.19,0.31,1.95,0.31,6.13,3.02,57.4,76.7,17.2,129,99.9,21.6,1.5,3.9,0.3,0.4,<0.5,0.23,1.9,9.1,1767.5,70.5,2.97,6.2,0.32,0.28,457,497,0.05,0.78,5.8,5.02,107,1,5,
"Kabanov et al., 2015, GSC OF7948",well,Little Bear N-09,300N096500126300,96E,64.982154,-126.5236909,Canol,Vermillion Creek,Core,1768,N09-1768,,76.82,5.84,3.2,0.43,0.97,0.55,1.13,0.28,0.07,<0.01,0.005,87,5,10.2,99.48,3958,0.3958,2,20.2,2.1,7.1,1.5,5.2,48.4,<1,141.8,0.4,3.6,20.6,130,1.1,63.6,18,17.6,31.3,3.97,14.8,3.25,0.52,3.06,0.46,2.82,0.54,1.59,0.21,1.35,0.2,5.76,2.58,46.2,53.6,12.7,89,66.3,13.4,1.1,1.9,0.2,0.2,<0.5,0.2,1.3,5.1,1768,70.4,5.14,5.7,0.47,0.25,462,502,0.05,0.92,5.76,4.84,99,1,4,
"Kabanov et al., 2015, GSC OF7948",well,Little Bear N-09,300N096500126300,96E,64.982154,-126.5236909,Canol,Vermillion Creek,Core,1768.5,N09-1768.5,,69.52,9.5,4.44,0.63,0.94,0.72,1.88,0.47,0.1,0.01,0.01,149,8,11.3,99.56,2681,0.2681,2,31.7,3.8,12.8,2.4,8.5,82.5,2,146.8,0.6,7,24.2,253,1.4,91.9,26.8,28.2,48.2,6.51,25,4.92,0.95,4.95,0.69,3.63,0.75,2.21,0.3,2.09,0.31,5.82,3.37,64.4,98.3,22.6,184,111.7,24.3,2.2,3.7,0.4,0.4,0.7,0.25,2.5,8.4,1768.5,69.9,3.57,6.14,0.37,0.2,464,504,0.04,0.83,6.14,5.31,100,1,3,
"Kabanov et al., 2015, GSC OF7948",well,Little Bear N-09,300N096500126300,96E,64.982154,-126.5236909,Canol,Vermillion Creek,Core,1769,N09-1769,,78.13,5.95,2.42,0.37,0.7,0.55,1.17,0.28,0.07,<0.01,0.006,64,5,9.9,99.51,3763,0.3763,3,17.5,2.3,7.3,1.5,5.3,48.9,1,117.2,0.4,4,21.5,113,<0.5,56.4,15.7,17,33.3,4.19,15.7,3.15,0.55,3.03,0.45,2.58,0.44,1.32,0.19,1.31,0.21,5.66,1.8,42.8,50.9,12.3,101,50.8,9.9,0.9,1.2,0.3,0.3,2.4,0.23,1.3,4,1769,70.7,4.48,5.16,0.47,0.2,468,508,0.05,0.82,5.64,4.82,91,1,4,
"Kabanov et al., 2015, GSC OF7948",well,Little Bear N-09,300N096500126300,96E,64.982154,-126.5236909,Canol,Vermillion Creek,Core,1769.5,N09-1769.5,,76.5,5.81,2.97,0.45,0.5,0.62,1.16,0.3,0.08,<0.01,0.006,119,6,11,99.42,4334,0.4334,<1,25.7,2,7.5,1.9,5.7,48.7,1,141.8,0.5,4.2,17,169,0.9,70,15.7,17.6,32,4.1,15.5,2.98,0.56,2.89,0.4,2.2,0.48,1.31,0.19,1.3,0.21,6.67,2.33,63,75.1,17.8,125,91.5,17.3,1.8,3.1,0.3,0.3,1.7,0.2,1.8,5.6,1769.5,70.7,4.33,5.52,0.44,0.19,467,507,0.06,0.84,6.7,5.86,82,1,3,
"Kabanov et al., 2015, GSC OF7948",well,Little Bear N-09,300N096500126300,96E,64.982154,-126.5236909,Canol,Vermillion Creek,Core,1770,N09-1770,,81.81,4.02,1.62,0.38,1.51,0.43,0.79,0.19,0.09,<0.01,0.005,87,4,8.7,99.57,3178,0.3178,<1,13.4,1.7,4.9,1.2,3.7,32.2,1,198.5,0.2,2.7,18.3,132,0.6,41.5,20.4,14.3,24.1,3.29,12.7,2.6,0.47,2.58,0.39,2.3,0.5,1.41,0.21,1.3,0.21,5.31,1.25,41.5,43.7,8.5,97,69.5,10.3,1.4,1.9,0.2,0.2,1.3,0.12,1,4.1,1770,70.6,5.69,5.14,0.53,0.32,462,502,0.06,0.93,4.9,3.97,105,1,7,
"Kabanov et al., 2015, GSC OF7948",well,Little Bear N-09,300N096500126300,96E,64.982154,-126.5236909,Canol,Vermillion Creek,Core,1770.5,N09-1770.5,,69.28,9.63,3.41,0.62,0.77,0.88,1.95,0.51,0.11,<0.01,0.01,161,9,12.3,99.52,2924,0.2924,4,28.3,4,13.4,2.8,9.3,83.6,2,143.9,0.6,7,33.2,249,1.3,103.1,30.9,30.4,53.5,7,27.6,4.99,0.98,4.88,0.71,4.21,0.85,2.54,0.37,2.41,0.36,6.96,2.57,118.4,83,16.2,268,137.5,16.1,3,3.9,0.4,0.4,<0.5,0.22,1.9,7.1,1770.5,70.4,3.19,5.67,0.36,0.24,467,507,0.07,0.76,6.75,5.99,84,1,4,
"Kabanov et al., 2015, GSC OF7948",well,Little Bear N-09,300N096500126300,96E,64.982154,-126.5236909,Canol,Vermillion Creek,Core,1771,N09-1771,,73.44,6.13,2.46,0.55,1.99,0.67,1.21,0.31,0.09,<0.01,0.006,148,6,12.7,99.57,2783,0.2783,3,18,2.6,7.9,1.8,6,50.1,2,179,0.5,4.1,23.4,199,1.1,65.9,23.1,19.1,32.9,4.32,17.6,3.5,0.65,3.69,0.54,3.07,0.59,1.79,0.26,1.59,0.26,7.59,1.94,74.4,69.5,14.5,178,113.9,14.3,2.7,3.1,0.3,0.3,1.3,0.15,1.5,7.2,1771,70.1,5.09,7.75,0.4,0.33,463,503,0.06,1.08,7.22,6.14,107,1,5,
"Kabanov et al., 2015, GSC OF7948",well,Little Bear N-09,300N096500126300,96E,64.982154,-126.5236909,Canol,Vermillion Creek,Core,1771.5,N09-1771.5,,74.41,5.95,2.25,0.48,1.9,0.62,1.19,0.29,0.07,<0.01,0.005,121,6,12.3,99.53,3326,0.3326,3,20.7,2.1,7.1,1.6,5.6,48.2,1,164.1,0.3,4.3,21.7,178,1.5,62.1,19.9,18.9,33.9,4.27,18.4,3.05,0.63,3.12,0.47,2.67,0.53,1.49,0.24,1.48,0.23,7.94,1.75,66,54.5,13.2,131,90.8,13.6,1.6,2.6,0.3,0.2,1.2,0.16,1.3,5.9,1771.5,70.9,7.33,8.99,0.45,0.34,462,502,0.08,1.38,7.64,6.26,118,1,4,
"Kabanov et al., 2015, GSC OF7948",well,Little Bear N-09,300N096500126300,96E,64.982154,-126.5236909,Canol,Vermillion Creek,Core,1772,N09-1772,,71.5,5.18,2.23,0.46,3.85,0.51,0.99,0.28,0.08,<0.01,0.005,127,7,14.5,99.58,2870,0.287,2,18,1.9,5.7,1.4,5.1,40.6,<1,221.6,0.3,3.4,29.5,192,0.9,53.5,24.9,18.8,32.5,4.42,18.4,3.63,0.72,3.9,0.56,3.51,0.7,1.91,0.26,1.74,0.26,8.68,1.76,59.2,55.3,11.7,107,97.8,13.1,1.3,2.2,0.2,0.2,<0.5,0.17,1,5.4,1772,70.2,6.44,9.32,0.41,0.39,462,502,0.07,1.33,7.87,6.54,118,1,5,
"Kabanov et al., 2015, GSC OF7948",well,Little Bear N-09,300N096500126300,96E,64.982154,-126.5236909,Canol,Vermillion Creek,Core,1772.5,N09-1772.5,,64.53,6.51,9.02,0.45,1.02,0.55,1.28,0.33,0.07,<0.01,0.007,176,7,15.8,99.6,2412,0.2412,5,22.9,2.9,8.5,1.9,5.9,55.9,1,118.9,0.3,4.1,30.3,228,0.7,65.5,23.5,20.7,36.7,4.97,18.9,3.72,0.72,3.83,0.53,3.05,0.62,1.85,0.29,1.83,0.26,7.5,7.11,90.4,123.4,26.5,241,145.8,62.6,2.8,7.4,0.3,0.6,0.9,0.41,3,49.3,1772.5,70.8,4.59,8.18,0.36,0.26,463,503,0.06,1.08,7.56,6.48,108,1,3,
"Kabanov et al., 2015, GSC OF7948",well,Little Bear N-09,300N096500126300,96E,64.982154,-126.5236909,Canol,Vermillion Creek,Core,1773,N09-1773,,66.78,8.68,5.63,0.63,1.42,0.65,1.69,0.43,0.08,<0.01,0.01,211,9,13.5,99.54,2556,0.2556,1,25.6,4.1,10.9,2.2,7.8,75.2,2,145.7,0.4,6.1,26,333,1.2,82.7,28.9,26,46.8,6.19,23.7,4.68,0.9,4.48,0.67,3.95,0.81,2.29,0.34,2.2,0.33,6.92,4.26,97.2,115.4,28.5,391,187.2,29.2,4.2,5.8,0.5,0.7,<0.5,0.24,2.2,20.4,1773,70.6,4.66,6.98,0.4,0.28,462,502,0.06,0.99,6.95,5.96,100,1,4,
"Kabanov et al., 2015, GSC OF7948",well,Little Bear N-09,300N096500126300,96E,64.982154,-126.5236909,Canol,Vermillion Creek,Core,1773.5,N09-1773.5,,71.42,6.37,2.87,0.52,2.89,0.57,1.23,0.32,0.08,<0.01,0.008,163,6,13.3,99.59,2584,0.2584,1,23.3,2.8,7.4,1.6,5.4,54.5,2,173.1,0.3,4.4,17.6,275,0.7,61.3,23,20.4,37.5,5.04,21.4,3.83,0.81,3.95,0.56,3.24,0.63,1.91,0.26,1.73,0.24,7.98,2.17,53.5,74.3,14.2,195,137.8,14.6,2.3,3.9,0.4,0.3,<0.5,0.15,2,6.8,1773.5,70.4,5.27,8.05,0.4,0.33,464,504,0.07,1.13,7.39,6.26,109,1,4,
"Kabanov et al., 2015, GSC OF7948",well,Little Bear N-09,300N096500126300,96E,64.982154,-126.5236909,Canol,Vermillion Creek,Core,1774,N09-1774,,68.02,6.84,4.79,0.88,2.64,0.64,1.37,0.33,0.08,0.01,0.006,71,8,13.9,99.51,3421,0.3421,4,20.2,2.8,8.2,1.6,6,55.9,1,212.4,0.4,4.4,10.4,158,1.3,62.6,18.9,19.9,36.6,4.83,19.5,3.74,0.65,3.64,0.52,2.73,0.54,1.62,0.23,1.46,0.25,7.5,3.73,33.6,71,14,92,63.2,22.8,1.2,1.6,0.4,0.3,<0.5,0.43,1.8,9.6,1774,70.3,4.36,6.69,0.39,0.29,464,504,0.06,0.94,6.87,5.93,97,1,4,
"Kabanov et al., 2015, GSC OF7948",well,Little Bear N-09,300N096500126300,96E,64.982154,-126.5236909,Canol,Vermillion Creek,Core,1774.5,N09-1774.5,,23.4,2.16,2.6,12.01,22.7,0.52,0.29,0.12,0.09,0.25,0.002,<20,2,34.2,98.38,10993,1.0993,1,4.8,0.6,2.1,0.8,2,12.5,<1,1479.8,<0.1,1.2,1.5,48,<0.5,29.3,6.6,7.1,13.3,1.53,6.4,1.13,0.04,1.19,0.16,0.91,0.19,0.57,0.09,0.58,0.1,11.92,1.94,3.1,18.8,3.3,7,16.8,3.2,0.5,0.2,<0.1,<0.1,<0.5,0.14,0.2,1.9,1774.5,70.5,3.05,3.16,0.49,0.52,460,500,0.11,0.55,3.9,3.35,81,3,13,
"Kabanov et al., 2015, GSC OF7948",well,Little Bear N-09,300N096500126300,96E,64.982154,-126.5236909,Canol,Vermillion Creek,Core,1775,N09-1775,,64.4,8.14,5.46,0.84,2.42,0.81,1.71,0.42,0.14,0.02,0.008,58,9,15.2,99.61,2454,0.2454,1,29.7,3.4,10.6,2.4,8.2,67.4,2,174.2,0.6,5.9,30.8,124,1.4,86.1,28.8,28.1,55.4,6.97,28.2,5.65,1.26,5.63,0.81,4.59,0.87,2.65,0.35,2.26,0.35,8.58,4.26,32.4,98.1,20.2,140,58.1,26.8,5.6,2.6,0.6,0.4,<0.5,0.64,1.3,7.8,1775,70.4,3.93,7.58,0.34,0.37,464,504,0.08,0.99,7.86,6.87,96,1,5,
"Kabanov et al., 2015, GSC OF7948",well,Little Bear N-09,300N096500126300,96E,64.982154,-126.5236909,Canol,Vermillion Creek,Core,1775.5,N09-1775.5,,65.5,7.45,4.54,0.84,2.78,0.67,1.54,0.38,0.13,0.01,0.007,75,8,15.7,99.56,2915,0.2915,5,32.6,3.3,9,2.1,7.2,61.7,1,179.6,0.3,5.3,30.2,153,1,78.6,32.5,27.5,49.4,6.41,25.6,4.7,1.11,5.31,0.8,4.47,0.88,2.57,0.35,2.38,0.33,9.27,3.49,45.6,86.1,18.6,144,71.9,28.2,1.7,3,0.3,0.4,<0.5,0.52,1.3,9,1775.5,70.6,5.28,9.24,0.36,0.3,465,505,0.07,1.23,8.74,7.51,106,1,3,
"Kabanov et al., 2015, GSC OF7948",well,Little Bear N-09,300N096500126300,96E,64.982154,-126.5236909,Canol,Vermillion Creek,Core,1776,N09-1776,,62.11,7.64,5.85,1.38,3.94,0.59,1.64,0.4,0.07,0.02,0.007,84,10,15.9,99.59,2410,0.241,3,23.8,3.1,8.9,2,6.8,63.9,2,215.2,0.4,5.4,20.5,147,1.6,75.7,24.8,24.1,43.1,5.53,22.8,4.23,0.82,4.43,0.64,3.68,0.76,2.16,0.32,2.04,0.31,8.19,4.5,54.9,72.7,15.4,366,77.2,33.5,2.5,2.3,0.4,0.3,<0.5,0.33,1.6,12.4,1776,70.5,4.19,7.1,0.37,0.31,466,506,0.07,0.96,7.24,6.28,98,1,4,
"Kabanov et al., 2015, GSC OF7948",well,Little Bear N-09,300N096500126300,96E,64.982154,-126.5236909,Canol,Vermillion Creek,Core,1776.5,N09-1776.5,,63.95,8.97,4,0.99,3.25,0.6,1.89,0.44,0.18,0.01,0.008,108,10,15.3,99.58,2533,0.2533,2,25.4,4.2,11,2.1,7.8,79.1,2,212.4,0.5,6,34.4,155,1.3,83.4,49.6,35.9,65.2,9.13,38.7,7.48,1.69,8.39,1.22,6.83,1.38,3.63,0.5,3.25,0.47,8.47,2.95,57.9,73.2,15.2,177,98.5,19.3,1.5,2.8,0.5,0.3,<0.5,0.34,2.1,8.4,1776.5,70.5,4.36,8.49,0.34,0.31,467,507,0.16,1.09,7.61,6.52,112,2,4,
"Kabanov et al., 2015, GSC OF7948",well,Little Bear N-09,300N096500126300,96E,64.982154,-126.5236909,Canol,Vermillion Creek,Core,1777,N09-1777,,58.92,9.53,6.44,1.37,4.15,0.55,1.8,0.35,0.08,0.01,0.007,82,8,16.2,99.43,4119,0.4119,1,17.5,3.5,11.4,1.7,6.3,70.9,3,253.5,0.5,6.7,9.1,155,1,65.9,21.3,23.2,42.5,5.43,21.7,4.08,0.64,4.12,0.59,3.3,0.64,1.81,0.27,1.77,0.27,7.58,4.99,29.5,63,18.8,91,80.5,17.2,1.6,1.1,1.8,0.2,<0.5,0.68,1.4,8.8,1777,69.9,3.54,7.88,0.31,0.25,468,508,0.05,0.97,7.29,6.32,108,1,3,
"Kabanov et al., 2015, GSC OF7948",well,Little Bear N-09,300N096500126300,96E,64.982154,-126.5236909,Canol,Vermillion Creek,Core,1777.5,N09-1777.5,,15.38,1.76,2.27,13,25.14,0.38,0.25,0.09,0.17,0.18,<0.002,<20,2,40,98.59,8952,0.8952,1,4.5,0.4,2,0.6,1.6,11.2,<1,1499.2,<0.1,1.1,1.6,44,<0.5,24.9,7.6,7.2,12.5,1.45,5.7,1.11,0.08,1.2,0.17,0.92,0.2,0.58,0.07,0.57,0.09,14.75,1.68,3.3,14.3,2.6,11,14.4,3.2,0.5,0.2,0.1,<0.1,<0.5,0.12,0.1,1.3,1777.5,70.8,4.2,5.07,0.45,0.42,466,506,0.08,0.81,5.79,4.98,88,1,7,
"Kabanov et al., 2015, GSC OF7948",well,Little Bear N-09,300N096500126300,96E,64.982154,-126.5236909,Canol,Vermillion Creek,Core,1778,N09-1778,,53.2,10.35,5.92,2.83,5.53,0.91,2.41,0.54,0.13,0.04,0.01,66,11,17.7,99.62,1959,0.1959,2,23.5,4.3,12.6,3.1,10,88,2,286.7,0.5,7.2,14.1,122,2,107.1,29.7,33.9,68.3,7.88,31.8,6.27,1.35,6.11,0.92,4.89,0.95,2.76,0.41,2.58,0.4,8.96,4.36,15,97.6,19.5,100,63.1,17.5,5,1.2,0.6,0.3,<0.5,0.48,0.5,5.6,1778,70.7,3.65,7.15,0.34,0.32,464,504,0.06,0.92,7.29,6.37,98,1,4,
"Kabanov et al., 2015, GSC OF7948",well,Little Bear N-09,300N096500126300,96E,64.982154,-126.5236909,Canol,Vermillion Creek,Core,1778.5,N09-1778.5,,55.99,9.56,4.51,1.37,7.11,0.72,2.07,0.5,0.14,0.02,0.009,128,10,17.5,99.47,3277,0.3277,1,33.3,4.3,11,2.7,8.6,80.4,2,336.7,0.7,6.7,19.8,153,1.1,100.2,30.6,31.3,58.7,7.27,28.8,5.59,1.18,5.59,0.81,4.64,0.95,2.49,0.38,2.34,0.36,8.81,3.31,64.2,84.2,19.4,142,114.8,21.3,2,2.5,0.7,0.4,<0.5,0.45,1.1,7.9,1778.5,70.4,3.23,6.94,0.32,0.32,466,506,0.05,0.87,7.45,6.58,93,1,4,
"Kabanov et al., 2015, GSC OF7948",well,Little Bear N-09,300N096500126300,96E,64.982154,-126.5236909,Canol,Vermillion Creek,Core,1779,N09-1779,,57.57,9.29,4.14,1.3,7.03,0.67,2.05,0.5,0.16,0.02,0.01,104,9,16.9,99.62,1964,0.1964,2,30.1,4.1,11.9,2.8,8.9,81.3,2,341.1,0.5,6.9,18.8,149,1.3,100.8,30.7,30.1,55.8,6.8,26.9,5.1,1.04,5.14,0.76,4.33,0.87,2.39,0.36,2.25,0.37,8.39,2.83,52.2,85.4,19.3,158,96.9,19.4,1.2,2.4,0.4,0.4,<0.5,0.41,1.3,7.6,1779,70.3,2.91,7.25,0.29,0.28,470,510,0.04,0.87,7.31,6.44,99,1,4,
"Kabanov et al., 2015, GSC OF7948",well,Little Bear N-09,300N096500126300,96E,64.982154,-126.5236909,Canol,Vermillion Creek,Core,1779.5,N09-1779.5,,57.61,9.27,4.25,1.46,7.19,0.69,2.04,0.48,0.12,0.02,0.01,119,10,16.5,99.61,2136,0.2136,1,20.5,4.2,11.5,2.5,8.2,81.6,2,358.9,0.5,6.7,13.5,166,1.6,93.6,26.1,27.6,49.2,6.2,25.4,4.65,0.91,4.54,0.66,3.86,0.79,2.16,0.35,2.05,0.32,8.61,3.29,49.6,69.1,14.8,101,100,19.8,0.9,2.1,0.4,0.3,<0.5,0.3,1.4,9.3,1779.5,70.8,2.93,7.16,0.29,0.32,471,511,0.14,0.86,7.13,6.27,100,2,4,
"Kabanov et al., 2015, GSC OF7948",well,Little Bear N-09,300N096500126300,96E,64.982154,-126.5236909,Canol,Vermillion Creek,Core,1780,N09-1780,,51.83,7.62,4.61,1.39,12.73,0.59,1.67,0.39,0.13,0.02,0.007,58,9,18.6,99.56,2719,0.2719,3,18,3.1,8.9,2,7.1,64.5,1,466.7,0.5,5.1,15.5,112,0.9,77.2,24.8,26.1,49.3,5.92,23,4.56,0.88,4.25,0.66,3.73,0.75,2.04,0.31,1.96,0.31,9.29,3.39,21.5,56.2,10.8,94,49.2,18.2,1.4,1.4,0.3,0.2,<0.5,0.38,0.6,7.5,1780,69.6,2.6,6.24,0.29,0.31,469,509,0.04,0.76,6.66,5.9,94,1,5,
"Kabanov et al., 2015, GSC OF7948",well,Little Bear N-09,300N096500126300,96E,64.982154,-126.5236909,Canol,Vermillion Creek,Core,1780.5,N09-1780.5,,60.43,7.55,3.28,0.92,8.47,0.56,1.62,0.39,0.2,0.02,0.007,67,8,16.2,99.67,1850,0.185,3,19.4,3.2,9,2.1,6.9,66.4,1,353.1,0.3,5.1,18.4,119,0.9,76.1,30.2,28.4,50.5,6.3,24.5,4.63,1.1,4.85,0.72,4.37,0.87,2.4,0.33,2.11,0.32,8.81,2.4,21.4,62.7,11.7,102,55.3,12.2,1.6,1.5,0.2,0.3,<0.5,0.36,0.7,3.5,1780.5,70.1,3.12,7.32,0.3,0.36,470,510,0.05,0.89,7,6.11,105,1,5,
"Kabanov et al., 2015, GSC OF7948",well,Little Bear N-09,300N096500126300,96E,64.982154,-126.5236909,Canol,Vermillion Creek,Core,1781,N09-1781,,53.24,7.89,4.71,1.35,11.85,0.65,1.67,0.41,0.12,0.02,0.008,154,9,17.7,99.63,1897,0.1897,4,19.8,3.5,9.4,2.2,7,67.4,1,435.7,0.4,5.3,16.7,160,0.7,82.1,25.5,26.2,48.1,5.99,24.1,4.34,0.92,4.45,0.65,3.75,0.75,2.15,0.32,1.89,0.3,8.66,3.47,73.6,68.8,13.9,91,135.1,20.2,2,2.1,0.4,0.3,<0.5,0.35,1.3,11.4,1781,70.7,3.35,6.21,0.35,0.4,465,505,0.05,0.82,6.34,5.52,98,1,6,
"Kabanov et al., 2015, GSC OF7948",well,Little Bear N-09,300N096500126300,96E,64.982154,-126.5236909,Canol,Vermillion Creek,Core,1781.5,N09-1781.5,,22.58,2.59,2.18,10.89,24.59,0.37,0.44,0.14,0.13,0.17,0.002,26,3,35.4,99.49,1374,0.1374,4,6.2,0.9,3.1,0.8,2.6,18.8,<1,1284.3,0.1,1.7,5.5,61,<0.5,32.6,10.4,9.3,16.6,2.05,8.7,1.54,0.27,1.54,0.23,1.38,0.25,0.79,0.12,0.81,0.13,12.6,1.54,12.5,18.8,3.8,27,23.1,6.7,0.6,0.5,0.1,<0.1,<0.5,0.11,0.2,2.4,1781.5,70.8,2.65,4.17,0.39,0.33,465,505,0.04,0.59,3.96,3.37,105,1,8,
"Kabanov et al., 2015, GSC OF7948",well,Little Bear N-09,300N096500126300,96E,64.982154,-126.5236909,Canol,Vermillion Creek,Core,1782,N09-1782,,64.36,7.51,4.42,0.81,4.59,0.52,1.56,0.4,0.09,0.02,0.007,72,9,15.4,99.68,1731,0.1731,2,17.5,3.4,8.9,2.3,7,64.2,<1,355.1,0.5,5.7,25.4,128,1.8,79.9,23.5,22.5,42.2,5.03,19.7,3.72,0.8,3.66,0.57,3.21,0.64,1.92,0.3,2.06,0.29,8.56,3.39,47.3,73,12.4,72,63.7,14.1,2,1.3,0.4,0.3,<0.5,0.41,0.8,4.8,1782,70.6,4.9,8.82,0.36,0.34,464,504,0.05,1.16,7.88,6.72,112,1,4,
"Kabanov et al., 2015, GSC OF7948",well,Little Bear N-09,300N096500126300,96E,64.982154,-126.5236909,Canol,Vermillion Creek,Core,1782.5,N09-1782.5,,67.64,10.34,3.18,0.85,2.09,0.63,1.9,0.46,0.09,0.01,0.007,110,9,12.4,99.58,2526,0.2526,6,12.9,4.2,11.6,2.4,7.6,78.8,1,307.4,0.6,9.6,13.4,295,0.9,85.6,22.8,24,42.5,5.45,21.5,4.08,0.8,4,0.6,3.55,0.7,2.01,0.29,1.87,0.29,6.27,2.32,48.4,73.5,17.1,156,97,12.8,1.9,1.8,0.3,0.3,<0.5,0.26,1.1,5.6,1782.5,70.3,4.64,7.53,0.38,0.27,465,505,0.04,1.03,5.97,4.94,126,1,5,
"Kabanov et al., 2015, GSC OF7948",well,Little Bear N-09,300N096500126300,96E,64.982154,-126.5236909,Canol,Vermillion Creek,Core,1783,N09-1783,,71.89,8.57,2.66,0.7,1.17,0.59,1.64,0.44,0.08,<0.01,0.008,123,8,11.9,99.68,1688,0.1688,<1,14.6,3.7,9.7,2.4,7.2,69,1,206.1,0.5,5.8,18.2,254,1.5,84.9,25.6,24.8,44.5,5.7,23.1,4.17,0.86,4.27,0.65,4.05,0.82,2.13,0.33,2.06,0.3,6.81,1.9,60,75.1,14.2,122,95.3,10.4,1.5,1.9,0.2,0.4,<0.5,0.2,1,4.3,1783,70.7,5.22,9.1,0.36,0.19,462,502,0.04,1.21,6.44,5.23,141,1,3,
"Kabanov et al., 2015, GSC OF7948",well,Little Bear N-09,300N096500126300,96E,64.982154,-126.5236909,Canol,Vermillion Creek,Core,1783.5,N09-1783.5,,73.77,7.14,2.28,0.68,1.24,0.54,1.31,0.37,0.06,<0.01,0.007,138,7,12.2,99.6,2418,0.2418,<1,11.9,3.3,8.1,2,6.1,58.3,<1,209.8,0.4,4.8,14.5,290,<0.5,72.5,21.8,20.1,35.7,4.6,18.6,3.6,0.74,3.56,0.54,3.2,0.62,1.77,0.25,1.66,0.26,7.25,1.68,62.6,60.1,13,178,103.7,9.2,1.7,1.2,0.2,0.3,<0.5,0.2,1.1,3.6,1783.5,70.7,7.02,10.04,0.41,0.29,452,492,0.09,1.44,7.01,5.57,143,1,4,
"Kabanov et al., 2015, GSC OF7948",well,Little Bear N-09,300N096500126300,96E,64.982154,-126.5236909,Canol,Vermillion Creek,Core,1784,N09-1784,,37.23,5.03,5.27,1.71,24.53,0.39,0.95,0.26,0.08,0.02,0.005,67,6,24.1,99.61,1766,0.1766,<1,9.3,2.3,5.8,1.6,4.7,38.4,<1,883.3,0.3,3.3,8.9,127,<0.5,54.9,21.3,16.4,30.3,3.77,15.6,2.61,0.57,2.78,0.44,2.73,0.59,1.82,0.25,1.57,0.25,8.16,3.99,30.5,32.8,8.5,58,50.2,15.1,0.5,1,<0.1,0.1,<0.5,0.13,0.8,6.3,1784,70.5,2.68,2.97,0.47,0.36,452,492,0.03,0.49,3.01,2.52,99,1,12,
"Kabanov et al., 2015, GSC OF7948",well,Little Bear N-09,300N096500126300,96E,64.982154,-126.5236909,Canol,Vermillion Creek,Core,1784.5,N09-1784.5,,72.07,7.68,2.58,0.75,1.46,0.58,1.42,0.39,0.09,<0.01,0.008,160,7,12.6,99.69,1568,0.1568,<1,14.2,3,8.9,2.1,6.8,61.9,3,212.6,0.4,4.9,19.5,271,0.8,76.4,19.6,21.7,39.9,5.26,21.1,4.06,0.8,4.04,0.57,3.14,0.63,1.78,0.25,1.45,0.24,7.11,1.89,86.5,70.2,15.2,157,117,10.8,1.7,1.9,0.2,0.3,<0.5,0.21,1.2,6.2,1784.5,70.1,3.89,7.94,0.33,0.23,464,504,0.05,1,6.7,5.7,119,1,3,
"Kabanov et al., 2015, GSC OF7948",well,Little Bear N-09,300N096500126300,96E,64.982154,-126.5236909,Canol,Vermillion Creek,Core,1785,N09-1785,,69.87,8.59,2.91,0.76,2.11,0.58,1.58,0.43,0.11,0.01,0.009,171,7,12.7,99.66,1652,0.1652,4,16.1,4,9.6,2,7.9,65.8,<1,246.3,0.3,5,18,317,0.9,80.1,19.4,22.1,40.1,5.16,20.3,3.93,0.65,3.52,0.53,2.89,0.61,1.72,0.25,1.56,0.24,7.16,2.11,102.9,83.7,18.2,166,127,15.1,2.1,2.7,0.2,0.3,<0.5,0.21,1.6,6.5,1785,70.4,3.75,7.5,0.33,0.33,466,506,0.07,0.96,6.72,5.76,112,1,5,
"Kabanov et al., 2015, GSC OF7948",well,Little Bear N-09,300N096500126300,96E,64.982154,-126.5236909,Canol,Vermillion Creek,Core,1785.5,N09-1785.5,,67.7,7.94,3.86,0.93,3.46,0.55,1.49,0.41,0.15,0.01,0.008,209,9,13.1,99.66,1467,0.1467,3,17.9,3.3,9.2,2,6.5,63.6,1,290.5,0.5,5.1,20.8,321,0.8,79.6,23,22.6,38,5.01,20.4,3.52,0.63,3.43,0.51,2.9,0.58,1.78,0.28,1.71,0.28,7.03,2.9,126,84.7,18.9,231,174.9,20.6,2.5,3.8,0.6,0.5,<0.5,0.26,2.2,10.4,1785.5,70.3,3.01,6.2,0.33,0.3,465,505,0.04,0.79,6.07,5.28,102,1,5,
"Kabanov et al., 2015, GSC OF7948",well,Little Bear N-09,300N096500126300,96E,64.982154,-126.5236909,Canol,Vermillion Creek,Core,1786,N09-1786,,76.7,5.73,1.67,0.61,2.17,0.39,1.03,0.29,0.09,<0.01,0.006,137,6,10.9,99.62,2177,0.2177,1,9.7,2.8,6.8,1.5,4.6,46.1,<1,252.4,0.3,3.9,12.2,332,0.6,54.1,18.7,15.9,27,3.42,13.1,2.5,0.53,2.52,0.37,2.33,0.46,1.41,0.22,1.28,0.19,6.58,1.21,43.2,55.1,11.2,159,91.9,10.1,2.2,2.3,0.2,0.3,<0.5,0.1,0.9,3.5,1786,70.8,5.05,7.56,0.4,0.32,463,503,0.07,1.07,6.02,4.95,126,1,5,
"Kabanov et al., 2015, GSC OF7948",well,Little Bear N-09,300N096500126300,96E,64.982154,-126.5236909,Canol,Vermillion Creek,Core,1786.5,N09-1786.5,,74.36,8.21,2.32,0.73,1.14,0.49,1.49,0.4,0.06,<0.01,0.007,138,7,10.4,99.68,1496,0.1496,1,13.9,3.7,9.6,2.1,6.4,66.8,<1,180.3,0.5,5.8,10.8,396,0.7,76.2,16.3,19.5,32.7,4.08,15.6,2.74,0.51,2.43,0.36,2.26,0.47,1.41,0.23,1.4,0.2,5.48,1.6,40.9,60.4,13.2,243,99.1,10.2,2.7,2.2,0.2,0.2,<0.5,0.11,1.4,3.1,1786.5,70.5,3.66,6.38,0.36,0.21,464,504,0.04,0.85,5.24,4.39,122,1,4,
"Kabanov et al., 2015, GSC OF7948",well,Little Bear N-09,300N096500126300,96E,64.982154,-126.5236909,Canol,Vermillion Creek,Core,1787,N09-1787,,72.92,8.1,2.16,1.01,1.83,0.5,1.46,0.42,0.13,0.01,0.009,139,7,11.1,99.64,1749,0.1749,2,15.4,3.5,10.7,2.3,7.2,68.6,2,268.9,0.5,5.5,17.3,365,0.9,87.8,34.2,28.5,44.4,6.12,23.7,4.3,0.9,4.56,0.68,4.06,0.92,2.65,0.37,2.32,0.35,6.21,1.65,62.7,74,12.7,204,113.5,9.6,3.1,2.5,0.2,0.4,1.8,0.13,0.9,3.4,1787,69.7,4.63,7.14,0.39,0.3,460,500,0.05,1,5.52,4.52,129,1,5,
"Kabanov et al., 2015, GSC OF7948",well,Little Bear N-09,300N096500126300,96E,64.982154,-126.5236909,Canol,Vermillion Creek,Core,1787.5,N09-1787.5,,80.94,5.02,1.1,0.48,1.68,0.34,0.85,0.22,0.05,<0.01,0.006,121,4,8.9,99.65,1998,0.1998,2,7.2,2.1,6.2,1.2,3.4,40.9,<1,264.6,0.3,2.7,9.8,329,<0.5,44.8,15.6,13.8,21.6,3.12,12.3,2.39,0.39,2.37,0.36,2.01,0.45,1.2,0.18,1.09,0.15,5.3,0.83,40.4,36.3,7,271,97.9,6.7,3.3,1.8,0.1,0.2,0.8,0.1,0.6,5,1787.5,70.4,3.68,4.42,0.45,0.26,471,511,0.05,0.69,4.41,3.72,100,1,6,
"Kabanov et al., 2015, GSC OF7948",well,Little Bear N-09,300N096500126300,96E,64.982154,-126.5236909,Hare Indian,Prohibition Creek,Core,1788,N09-1788,,80.16,5.35,1.28,0.59,1.55,0.34,0.94,0.23,0.04,<0.01,0.007,122,5,9.2,99.69,1765,0.1765,<1,7.8,2.5,7.4,1.1,3.9,47.5,<1,230.3,0.3,3.2,7.9,334,0.5,45,16.6,14.9,22.9,3.1,12.5,2.22,0.38,2.14,0.33,2,0.45,1.27,0.19,1.18,0.2,5.09,0.99,31.3,33.9,7.2,174,89.9,6.2,2.1,1.7,0.1,0.3,1.3,0.09,0.6,5.2,1788,70.4,4.42,4.59,0.49,0.28,469,509,0.2,0.78,4.59,3.81,100,4,6,
"Kabanov et al., 2015, GSC OF7948",well,Little Bear N-09,300N096500126300,96E,64.982154,-126.5236909,Hare Indian,Prohibition Creek,Core,1788.5,N09-1788.5,,77.38,7.26,1.71,0.72,1.03,0.39,1.3,0.3,0.05,<0.01,0.01,147,6,9.5,99.65,1781,0.1781,<1,11.1,3.5,9.3,1.5,5,64.2,<1,190.3,0.3,3.9,11.1,447,<0.5,55.6,19.9,18.5,29.1,4,15.6,2.6,0.46,2.62,0.39,2.29,0.52,1.46,0.23,1.46,0.23,5.39,1.28,44.7,41.9,8,324,116.7,9.9,3.5,2.2,0.1,0.3,1.1,0.09,1.2,5.9,1788.5,70.6,3.81,5.03,0.43,0.22,469,509,0.05,0.75,4.93,4.18,102,1,4,
"Kabanov et al., 2015, GSC OF7948",well,Little Bear N-09,300N096500126300,96E,64.982154,-126.5236909,Hare Indian,Prohibition Creek,Core,1789,N09-1789,,80.62,6.13,1.31,0.53,1.03,0.33,1.05,0.26,0.03,<0.01,0.009,118,5,8.3,99.65,1985,0.1985,<1,8.6,2.8,7.6,1.2,4.7,55.4,<1,207.1,0.3,3.4,7.7,388,<0.5,53.2,14.1,16,24.6,3.31,12.2,2.13,0.39,1.98,0.31,1.69,0.39,1.22,0.17,1.07,0.17,4.74,1,30.7,35.6,6.9,209,97.2,6.1,1.8,1.5,0.1,0.3,0.9,0.09,0.7,5.7,1789,70.2,4.41,4.51,0.49,0.22,470,510,0.05,0.76,4.34,3.58,104,1,5,
"Kabanov et al., 2015, GSC OF7948",well,Little Bear N-09,300N096500126300,96E,64.982154,-126.5236909,Hare Indian,Prohibition Creek,Core,1789.5,N09-1789.5,,76.32,7.53,2.47,0.79,1.06,0.39,1.29,0.33,0.05,<0.01,0.009,140,6,9.4,99.63,1870,0.187,<1,11.5,3.3,9.6,1.8,5.8,64.1,1,204,0.6,4.9,10.1,392,0.8,60.3,17,17.6,30.4,4.08,15.7,2.6,0.46,2.32,0.36,2.21,0.45,1.28,0.21,1.22,0.2,4.71,1.85,36.2,43.5,9.3,373,113,7.9,3.5,2,0.1,0.4,0.6,0.13,0.9,5.2,1789.5,70.8,3.95,4.13,0.49,0.23,468,508,0.04,0.69,4.02,3.33,103,1,6,
"Kabanov et al., 2015, GSC OF7948",well,Little Bear N-09,300N096500126300,96E,64.982154,-126.5236909,Hare Indian,Prohibition Creek,Core,1790,N09-1790,,69.82,8.7,2.51,1.89,2.49,0.45,1.58,0.39,0.06,0.02,0.012,157,8,11.6,99.56,2017,0.2017,<1,11.9,4,11,1.6,6.8,75.5,1,327.2,0.5,4.7,14.1,414,0.8,73.2,28.6,25.4,39.6,5.25,18.8,3.04,0.57,2.99,0.48,3.04,0.71,2.1,0.32,1.92,0.32,5.55,1.9,56.9,54,10,389,126.6,9.3,3.9,2.2,0.2,0.3,0.6,0.16,1.1,8.1,1790,70.6,2.8,4.32,0.39,0.22,468,508,0.05,0.61,4.58,3.97,94,1,5,
"Kabanov et al., 2015, GSC OF7948",well,Little Bear N-09,300N096500126300,96E,64.982154,-126.5236909,Hare Indian,Prohibition Creek,Core,1790.5,N09-1790.5,,79.95,5.63,1.34,0.75,1.43,0.33,0.97,0.22,0.05,<0.01,0.006,112,5,8.9,99.64,2209,0.2209,<1,7.7,2.5,6.9,0.9,3.8,45.6,<1,204.8,0.3,2.7,8.9,288,<0.5,40.5,16.1,14.2,21.2,3.08,11.7,2.19,0.35,2.12,0.32,1.82,0.38,1.17,0.15,0.95,0.16,4.92,1.02,36.8,33.6,6.8,186,88.5,6.3,1.7,1.7,0.1,0.3,1,0.09,0.9,4,1790.5,70.8,5.52,4.62,0.54,0.26,469,509,0.05,0.87,4.35,3.48,106,1,6,
"Kabanov et al., 2015, GSC OF7948",well,Little Bear N-09,300N096500126300,96E,64.982154,-126.5236909,Hare Indian,Prohibition Creek,Core,1791,N09-1791,,72.95,5.35,1.42,2.17,4.55,0.38,0.95,0.25,0.07,0.02,0.007,91,5,11.4,99.55,2714,0.2714,2,6.1,1.9,6.3,1.6,3.7,40,<1,383.4,0.4,3.2,7,273,<0.5,59.6,20.3,16.2,23.9,3.4,13.5,2.46,0.35,2.64,0.38,2.32,0.51,1.58,0.24,1.46,0.24,5.29,1.07,24.3,32.6,6.6,145,76.1,6.4,1.5,1.7,0.1,0.3,1,0.07,0.4,3.6,1791,70.6,4.38,3.63,0.55,0.36,466,506,0.04,0.69,3.67,2.98,99,1,10,
"Kabanov et al., 2015, GSC OF7948",well,Little Bear N-09,300N096500126300,96E,64.982154,-126.5236909,Hare Indian,Prohibition Creek,Core,1791.5,N09-1791.5,,68.42,10.2,2.9,1.3,1.64,0.51,1.84,0.45,0.07,0.01,0.014,220,8,12.2,99.57,1765,0.1765,4,15,4.7,12.6,2.6,7.4,86.6,1,241.8,0.4,5.5,19.6,489,0.7,103.8,25.9,26.3,38.4,5.59,22.1,3.72,0.69,3.61,0.53,3.22,0.67,1.98,0.29,1.79,0.3,6.27,2.09,93,84.2,15.7,498,188.3,16.2,5.9,3.9,0.3,0.5,1.1,0.23,1.5,9.4,1791.5,70.4,3.29,6.15,0.35,0.24,468,508,0.05,0.81,5.73,4.92,107,1,4,
"Kabanov et al., 2015, GSC OF7948",well,Little Bear N-09,300N096500126300,96E,64.982154,-126.5236909,Hare Indian,Prohibition Creek,Core,1792,N09-1792,,3.61,0.34,24.27,1.22,33.3,0.04,0.05,0.01,0.1,0.02,<0.002,68,2,29.2,92.18,2380,0.238,<1,1.6,<0.1,<0.5,<0.1,0.4,2.2,<1,1873.7,<0.1,0,2.2,23,<0.5,5.2,5.1,2.8,2.5,0.42,1.4,0.26,0.1,0.34,0.07,0.35,0.13,0.33,0.05,0.39,0.07,8.32,17.5,27,23.6,5.6,15,52.7,84,0.6,3.5,<0.1,0.3,1.1,0.65,3.5,30.4,1792,70.8,0.75,0.38,0.66,0.31,405,445,0.03,0.11,0.53,0.42,72,6,58,
"Kabanov et al., 2015, GSC OF7948",well,Little Bear N-09,300N096500126300,96E,64.982154,-126.5236909,Hare Indian,Prohibition Creek,Core,1792.5,N09-1792.5,,69.64,9.39,2.73,0.97,1.49,0.43,1.73,0.4,0.09,<0.01,0.015,250,10,12.6,99.51,1949,0.1949,2,13.4,4.2,11.4,2,6.5,83.9,1,227.1,0.4,5,29.9,645,<0.5,73.5,38.5,32.1,43.8,6.94,26.6,4.82,0.88,4.85,0.73,4.55,0.98,2.74,0.38,2.43,0.37,6.93,2.12,125.7,97.8,14.1,692,214.3,15.1,7.9,4.7,0.2,0.7,<0.5,0.23,1.1,11.9,1792.5,70.2,3.35,7.53,0.31,0.18,468,508,0.04,0.92,6.62,5.7,114,1,3,
"Kabanov et al., 2015, GSC OF7948",well,Little Bear N-09,300N096500126300,96E,64.982154,-126.5236909,Hare Indian,Prohibition Creek,Core,1793,N09-1793,,70.37,7.52,2.09,1.7,3.23,0.39,1.33,0.33,0.07,0.01,0.01,164,7,12.5,99.59,1826,0.1826,3,10,3.2,8.4,1.6,5.1,64.3,<1,340.6,0.2,4,16.1,376,<0.5,58.9,31.8,23.5,33.7,5,19.9,3.28,0.74,3.65,0.55,3.44,0.76,2.07,0.31,2.01,0.33,6.55,1.55,66.6,53.1,8.9,430,119.2,9.9,4.8,2.8,0.1,0.4,<0.5,0.16,1.2,5.5,1793,70,3.39,6.3,0.35,0.21,467,507,0.04,0.82,5.36,4.54,118,1,4,
"Kabanov et al., 2015, GSC OF7948",well,Little Bear N-09,300N096500126300,96E,64.982154,-126.5236909,Hare Indian,Prohibition Creek,Core,1793.5,N09-1793.5,,77.91,6.1,1.6,0.62,1.68,0.3,1.04,0.23,0.06,<0.01,0.007,122,5,10,99.54,3149,0.3149,2,7.8,2.8,6.6,1,3.9,49.9,<1,220.7,0.3,3.1,11.6,280,<0.5,38.5,19,16,23.3,3.38,13.4,2.4,0.43,2.72,0.4,2.43,0.49,1.39,0.2,1.32,0.2,5.85,1.26,42.4,35.9,7.4,153,92.7,6.8,1.4,1.7,0.1,0.3,<0.5,0.13,0.9,4.5,1793.5,70.6,6.72,7.5,0.47,0.31,456,496,0.04,1.2,5.28,4.08,142,1,6,
"Kabanov et al., 2015, GSC OF7948",well,Little Bear N-09,300N096500126300,96E,64.982154,-126.5236909,Hare Indian,Prohibition Creek,Core,1794,N09-1794,,77.16,5.24,1.53,0.67,2.26,0.32,0.91,0.22,0.08,<0.01,0.008,140,5,11.2,99.65,2103,0.2103,<1,7.6,2.3,6.2,1,3.4,43.3,<1,250.2,0.3,2.5,15.2,251,0.6,40,27.6,17.7,24.7,3.78,15.3,2.85,0.57,3.26,0.47,2.96,0.63,1.82,0.27,1.63,0.25,6.96,1.23,62.2,36.6,6.9,168,97,5.9,1.8,1.6,<0.1,0.3,<0.5,0.14,0.9,4.1,1794,70.5,8.2,8.76,0.48,0.26,448,488,0.05,1.43,6.14,4.71,143,1,4,
"Kabanov et al., 2015, GSC OF7948",well,Little Bear N-09,300N096500126300,96E,64.982154,-126.5236909,Hare Indian,Prohibition Creek,Core,1794.5,N09-1794.5,,73.97,8.57,2.2,0.92,1.29,0.36,1.51,0.33,0.06,<0.01,0.01,149,8,10.4,99.61,2094,0.2094,2,11.1,4.7,10.2,1.5,5.4,77.2,<1,213.3,0.4,4.5,15,349,<0.5,56.9,21.9,21.2,31.9,4.52,17.5,3.21,0.58,3.31,0.49,2.67,0.6,1.83,0.24,1.59,0.24,5.5,1.63,72.3,55.2,9.1,365,128.2,9.4,3.1,2,0.1,0.4,0.5,0.22,1.1,6,1794.5,70.4,3.12,5.72,0.35,0.19,468,508,0.04,0.76,5.02,4.26,114,1,4,
"Kabanov et al., 2015, GSC OF7948",well,Little Bear N-09,300N096500126300,96E,64.982154,-126.5236909,Hare Indian,Prohibition Creek,Core,1795,N09-1795,,70.64,9.54,2.89,1.01,1.4,0.43,1.73,0.37,0.06,<0.01,0.011,145,8,11.5,99.61,2358,0.2358,3,13,5.1,11.8,1.5,6.1,86.2,1,215,0.4,4.8,16.1,247,0.7,61.7,20.9,21.8,32.6,4.41,16.5,2.74,0.46,2.82,0.43,2.6,0.53,1.56,0.21,1.53,0.23,6.07,2.12,67.4,48.8,10.4,188,119.2,12.6,1.7,1.9,0.1,0.3,<0.5,0.23,1.6,5.3,1795,70.6,3.68,6.64,0.36,0.27,467,507,0.05,0.88,5.56,4.68,119,1,5,
"Kabanov et al., 2015, GSC OF7948",well,Little Bear N-09,300N096500126300,96E,64.982154,-126.5236909,Hare Indian,Prohibition Creek,Core,1795.5,N09-1795.5,,77.53,7.01,1.61,0.55,1.29,0.3,1.13,0.23,0.04,<0.01,0.009,122,5,9.9,99.58,2669,0.2669,<1,7.7,3.2,8.1,1,3.6,59.5,<1,205,0.2,3.2,10.7,302,<0.5,37.5,12.5,13.4,20.8,2.85,11.1,1.9,0.36,1.78,0.26,1.6,0.33,1.06,0.14,0.88,0.14,5.52,1.26,42.9,38.5,5.9,248,98.6,7.9,2,1.7,<0.1,0.2,<0.5,0.11,1.1,3.8,1795.5,70.4,5.26,7.05,0.43,0.22,458,498,0.03,1.04,5,3.96,141,1,4,
"Kabanov et al., 2015, GSC OF7948",well,Little Bear N-09,300N096500126300,96E,64.982154,-126.5236909,Hare Indian,Prohibition Creek,Core,1796,N09-1796,,67.51,6.83,2.06,2.26,5.36,0.38,1.21,0.28,0.07,0.02,0.008,118,7,13.5,99.5,2809,0.2809,2,8.5,3,8.6,1.3,4.5,59,<1,553.4,0.3,3.8,10,235,0.7,50.6,24.1,20,29.8,4.07,16,2.93,0.51,2.88,0.45,2.73,0.55,1.68,0.26,1.54,0.24,6.34,1.47,47.2,36.1,7.8,176,92.4,8.9,1.3,1.5,0.1,0.2,0.5,0.13,0.7,4.5,1796,70.5,3.52,5.5,0.39,0.26,465,505,0.03,0.77,4.48,3.71,123,1,6,
"Kabanov et al., 2015, GSC OF7948",well,Little Bear N-09,300N096500126300,96E,64.982154,-126.5236909,Hare Indian,Prohibition Creek,Core,1796.5,N09-1796.5,,65.28,6.4,1.88,3.09,6.14,0.38,1.13,0.26,0.05,0.02,0.009,105,6,14.9,99.58,2042,0.2042,2,7.8,3,7.8,1.1,3.9,55.2,<1,679.2,0.3,3.6,10.3,215,<0.5,45.8,19.3,17.2,23.8,3.55,13.6,2.38,0.53,2.47,0.38,2.19,0.48,1.29,0.2,1.29,0.21,6.73,1.26,38.8,29,6,135,77,7.3,1,1.3,0.1,0.1,<0.5,0.09,0.6,3.7,1796.5,70.7,4.05,5.55,0.42,0.4,462,502,0.05,0.82,4.48,3.66,124,1,9,
"Kabanov et al., 2015, GSC OF7948",well,Little Bear N-09,300N096500126300,96E,64.982154,-126.5236909,Hare Indian,Prohibition Creek,Core,1797,N09-1797,,74.59,6.34,1.62,0.79,2.84,0.33,1.1,0.24,0.06,<0.01,0.007,132,5,11.7,99.63,2253,0.2253,<1,6.6,2.8,7.7,1.1,3.9,58.2,<1,283.8,0.2,3.6,11.7,223,<0.5,39.3,20.2,16.6,24.4,3.41,13.5,2.37,0.5,2.64,0.38,2.33,0.48,1.41,0.21,1.37,0.21,6.34,1.23,55.8,34.8,6.3,175,99.8,8.2,1.4,1.5,<0.1,0.2,<0.5,0.11,0.7,4.4,1797,70.2,4.34,7.12,0.38,0.25,464,504,0.04,0.97,5.41,4.44,132,1,5,
"Kabanov et al., 2015, GSC OF7948",well,Little Bear N-09,300N096500126300,96E,64.982154,-126.5236909,Hare Indian,Prohibition Creek,Core,1797.5,N09-1797.5,,77.17,6.77,1.56,0.53,1.75,0.3,1.17,0.24,0.06,<0.01,0.008,133,5,10.1,99.69,1771,0.1771,2,6.9,3.7,7.4,1,3.8,61.7,<1,213.1,0.3,3.4,15.7,230,<0.5,37.8,17.6,15.1,20.9,3.18,12.2,2.37,0.51,2.32,0.35,1.93,0.44,1.28,0.17,1.08,0.17,5.92,1.18,68.3,37.4,5.4,232,97.6,6.9,1.8,1.2,<0.1,0.2,<0.5,0.13,1,3.2,1797.5,70.9,4.27,7.34,0.37,0.24,465,505,0.03,0.98,5.35,4.37,137,1,4,
"Kabanov et al., 2015, GSC OF7948",well,Little Bear N-09,300N096500126300,96E,64.982154,-126.5236909,Hare Indian,Prohibition Creek,Core,1798,N09-1798,,73.35,8.53,2.31,0.67,1.59,0.41,1.52,0.36,0.07,<0.01,0.011,188,6,10.7,99.56,2472,0.2472,1,10,3.8,9.5,1.5,5.8,75.2,1,206.1,0.4,4.9,21.3,359,0.9,57.4,24,21.3,30.9,4.89,18.3,3.37,0.65,3.42,0.52,3.01,0.64,1.78,0.26,1.59,0.24,6.02,1.73,101.3,57.4,7.8,376,157.4,13.2,2.3,2.1,0.2,0.4,<0.5,0.17,1.3,6.7,1798,70.2,3.32,6.64,0.33,0.26,465,505,0.03,0.84,5.38,4.54,123,1,5,
"Kabanov et al., 2015, GSC OF7948",well,Little Bear N-09,300N096500126300,96E,64.982154,-126.5236909,Hare Indian,Prohibition Creek,Core,1798.5,N09-1798.5,,75.07,5.92,1.85,0.48,2.6,0.31,1.03,0.23,0.12,<0.01,0.009,185,5,12,99.62,2118,0.2118,<1,7.7,2.9,6.7,0.9,3.6,50.2,<1,249,0.2,2.9,24.5,277,0.7,40.1,35.5,20.6,26.6,4.51,18.7,3.51,0.78,3.95,0.6,3.47,0.82,2.31,0.33,1.98,0.3,7.42,1.5,110.9,46,7.1,231,137.9,11.9,1.7,1.9,<0.1,0.3,<0.5,0.17,1.3,4.6,1798.5,70.2,5.5,9.07,0.38,0.23,460,500,0.05,1.24,6.86,5.62,132,1,3,
"Kabanov et al., 2015, GSC OF7948",well,Little Bear N-09,300N096500126300,96E,64.982154,-126.5236909,Hare Indian,Prohibition Creek,Core,1799,N09-1799,,67.83,11.44,3.44,0.93,2.01,0.37,1.99,0.39,0.06,<0.01,0.012,168,10,11.1,99.62,1920,0.192,2,12.4,6.9,12.9,1.6,6.3,106.8,1,257.9,0.4,5.5,17.3,386,1.1,58.3,21.5,23.8,37.1,5.28,19.6,3.58,0.67,3.44,0.51,3.07,0.63,1.82,0.25,1.68,0.27,4.62,2.68,91,45.3,9.7,275,144.6,19.1,1.7,2.1,0.2,0.3,<0.5,0.2,2.3,7.1,1799,70.9,2.15,4.37,0.33,0.23,467,507,0.02,0.55,4.06,3.51,108,0,6,
"Kabanov et al., 2015, GSC OF7948",well,Little Bear N-09,300N096500126300,96E,64.982154,-126.5236909,Hare Indian,Prohibition Creek,Core,1799.5,N09-1799.5,,70.69,10.52,2.74,0.77,1.33,0.4,1.86,0.39,0.06,<0.01,0.011,183,8,10.8,99.61,1792,0.1792,4,12.4,6.2,11.6,1.7,6.3,96.4,1,228.7,0.4,5.8,15.4,501,0.8,58.8,21,21.6,34.3,5.03,19.2,3.46,0.69,3.35,0.5,3,0.61,1.74,0.25,1.66,0.23,4.77,1.93,86,50.5,9.4,330,151,18.7,2.6,2.8,0.2,0.5,0.5,0.19,2.6,7.3,1799.5,70.4,2.49,4.89,0.34,0.22,468,508,0.03,0.63,4.41,3.78,111,1,5,
"Kabanov et al., 2015, GSC OF7948",well,Little Bear N-09,300N096500126300,96E,64.982154,-126.5236909,Hare Indian,Prohibition Creek,Core,1800,N09-1800,,65.13,10.58,3.33,1.26,3.34,0.6,1.94,0.49,0.08,0.01,0.015,194,10,12.8,99.59,1529,0.1529,4,12.6,4.8,12.1,2.4,7.3,88.8,1,281.5,0.6,7,19.2,616,0.8,78.8,29.1,26.4,38.2,5.84,21.4,3.87,0.85,4.07,0.63,3.81,0.8,2.31,0.34,2.13,0.34,5.42,2.38,114.8,79.9,12,393,161.2,19.4,3,3.9,0.2,0.7,<0.5,0.19,1.9,10.2,1800,70.9,3.62,5.88,0.38,0.26,465,505,0.05,0.81,4.58,3.77,128,1,6,
"Kabanov et al., 2015, GSC OF7948",well,Little Bear N-09,300N096500126300,96E,64.982154,-126.5236909,Hare Indian,Prohibition Creek,Core,1800.5,N09-1800.5,,72.48,10.62,2.41,0.72,1.14,0.36,1.83,0.37,0.05,<0.01,0.012,154,8,9.7,99.66,1707,0.1707,<1,9.5,5.9,11.1,1.6,5.8,95.4,1,212.9,0.4,5.3,11.4,393,1,51,17,19.5,30.6,4.1,15.9,2.5,0.65,2.62,0.38,2.34,0.47,1.45,0.21,1.26,0.21,4.2,1.67,67.1,35.4,8.2,217,124.3,14.7,1.3,1.8,0.1,0.3,<0.5,0.13,1.8,5.8,1800.5,70.8,1.98,4.16,0.32,0.18,470,510,0.02,0.52,3.76,3.24,111,1,5,
"Kabanov et al., 2015, GSC OF7948",well,Little Bear N-09,300N096500126300,96E,64.982154,-126.5236909,Hare Indian,Prohibition Creek,Core,1801,N09-1801,,64.28,9.64,3.22,2.5,4.55,0.35,1.68,0.36,0.07,0.02,0.011,157,11,12.9,99.62,1732,0.1732,<1,9.9,5.1,10.5,1.5,5.4,85.7,1,410.5,0.4,5.9,13.6,297,0.7,50.1,25.3,22.3,33.1,4.55,17,3.12,0.72,3.23,0.47,2.82,0.62,1.89,0.27,1.94,0.3,5.78,1.94,82.6,37.4,8.7,217,126.5,15.4,1.7,1.6,0.1,0.3,<0.5,0.17,1.5,8.4,1801,70.5,2.34,4.44,0.35,0.25,467,507,0.03,0.58,4.08,3.5,109,1,6,
"Kabanov et al., 2015, GSC OF7948",well,Little Bear N-09,300N096500126300,96E,64.982154,-126.5236909,Hare Indian,Prohibition Creek,Core,1801.5,N09-1801.5,,69.27,10.94,2.9,0.95,1.93,0.38,1.89,0.41,0.05,<0.01,0.012,169,8,10.9,99.65,1774,0.1774,2,10.6,5.7,11.2,1.6,6.1,94.9,1,240.7,0.3,6.2,13.2,367,1,56,18.6,20,32.2,4.39,17,3.03,0.58,2.72,0.41,2.39,0.49,1.56,0.22,1.4,0.2,4.83,2.06,80.8,37.8,8.8,233,134.3,14.6,1.1,2.3,0.1,0.3,<0.5,0.14,1.7,6.7,1801.5,70,2.29,4.68,0.33,0.22,466,506,0.02,0.59,4.2,3.61,111,0,5,
"Kabanov et al., 2015, GSC OF7948",well,Little Bear N-09,300N096500126300,96E,64.982154,-126.5236909,Hare Indian,Prohibition Creek,Core,1802,N09-1802,,69.03,9.56,2.47,1.15,2.83,0.35,1.65,0.36,0.09,0.01,0.011,173,7,12.1,99.65,1663,0.1663,<1,8.2,5,9.9,1.4,5.1,81.3,<1,244,0.3,5,14.7,327,0.7,49.7,18.7,18.1,28.3,4.07,16.7,2.84,0.76,3.07,0.43,2.36,0.52,1.46,0.21,1.2,0.2,5.73,1.68,98.6,38.1,7.3,293,128.7,14,2,2.2,0.1,0.3,<0.5,0.15,1.9,5.9,1802,70.8,2.89,5.62,0.34,0.27,469,509,0.05,0.72,4.93,4.21,114,1,5,
"Kabanov et al., 2015, GSC OF7948",well,Little Bear N-09,300N096500126300,96E,64.982154,-126.5236909,Hare Indian,Prohibition Creek,Core,1802.5,N09-1802.5,,65.35,9.34,3.36,1.43,3.79,0.44,1.64,0.38,0.08,0.02,0.01,189,10,13.8,99.68,1467,0.1467,3,11,4.3,8.6,1.6,5.1,73.5,<1,289.1,0.4,5.3,20.5,287,0.8,56.1,20.7,21.9,32.9,4.86,18.7,3.37,0.8,3.34,0.48,2.81,0.61,1.79,0.25,1.69,0.25,7.04,2.29,97,42.4,10.2,212,138.5,17.3,1.5,2.3,0.2,0.2,<0.5,0.2,1.4,7.8,1802.5,70.1,2.8,6.15,0.31,0.27,469,509,0.06,0.76,5.85,5.09,105,1,5,
"Kabanov et al., 2015, GSC OF7948",well,Little Bear N-09,300N096500126300,96E,64.982154,-126.5236909,Hare Indian,Prohibition Creek,Core,1803,N09-1803,,67.21,12.66,2.92,0.87,1.29,0.41,2.19,0.49,0.08,<0.01,0.013,194,11,11.4,99.61,1761,0.1761,1,11.8,7.6,13.6,1.8,8,117.1,2,257.3,0.5,7.7,20.2,493,0.9,66.4,36.3,30.6,46.9,6.99,28.2,5.18,1.13,5.47,0.76,4.57,0.92,2.74,0.38,2.34,0.35,5.32,1.95,102.7,46,11.2,293,150.1,17,1.9,2.6,0.2,0.4,1.6,0.2,1.8,9,1803,71,2.05,5.13,0.29,0.19,470,510,0.04,0.61,4.95,4.34,104,1,4,
"Kabanov et al., 2015, GSC OF7948",well,Little Bear N-09,300N096500126300,96E,64.982154,-126.5236909,Hare Indian,Prohibition Creek,Core,1803.5,N09-1803.5,,63.2,12.49,3.96,1.46,2.12,0.5,2.21,0.52,0.09,0.01,0.013,191,12,13,99.61,1664,0.1664,1,11.8,6.8,13.9,2.4,7.3,110.9,1,299,0.5,7.5,20.5,349,0.7,76.2,30.6,28.9,43.9,6.42,24,4.58,1.03,4.5,0.67,3.87,0.85,2.59,0.35,2.3,0.37,5.99,2.53,119.4,56.3,11.4,361,159,16.7,2.9,2.6,0.2,0.3,0.5,0.23,1.6,10.4,1803.5,70.9,2.17,4.9,0.31,0.19,469,509,0.04,0.6,5.18,4.58,95,1,4,
"Kabanov et al., 2015, GSC OF7948",well,Little Bear N-09,300N096500126300,96E,64.982154,-126.5236909,Hare Indian,Prohibition Creek,Core,1804,N09-1804,,66.06,11.83,3.28,1.27,2.16,0.42,2.07,0.49,0.06,0.01,0.012,165,11,11.9,99.61,1902,0.1902,3,10.9,7,13.2,2.2,7,107.2,1,286.9,0.4,7.2,14.7,426,<0.5,74.7,24.9,26,41.2,5.76,21.2,4.12,0.87,4.01,0.61,3.66,0.69,2.16,0.31,1.97,0.31,5.35,2.02,76.2,38.7,10.1,266,128.2,15.5,2.1,2.1,0.2,0.2,<0.5,0.17,1.4,7.5,1804,70.5,2.07,4.86,0.3,0.2,470,510,0.03,0.59,4.59,4,106,1,4,
"Kabanov et al., 2015, GSC OF7948",well,Little Bear N-09,300N096500126300,96E,64.982154,-126.5236909,Hare Indian,Prohibition Creek,Core,1804.5,N09-1804.5,,68.41,12.88,3.31,0.88,0.55,0.39,2.22,0.48,0.06,<0.01,0.012,146,11,10.4,99.64,1806,0.1806,2,14,8.1,14.2,2,7.4,126.1,2,235.7,0.5,7.1,11.3,302,0.6,69.5,22,26.8,43.1,5.56,20.6,3.59,0.72,3.28,0.49,2.78,0.62,1.72,0.27,1.7,0.27,4.12,2.25,64.6,39,11.4,234,130.9,16.8,1.5,1.5,0.2,0.2,<0.5,0.17,1.4,7.7,1804.5,70.8,1.96,4.14,0.32,0.13,470,510,0.04,0.52,3.94,3.42,105,1,3,
"Kabanov et al., 2015, GSC OF7948",well,Little Bear N-09,300N096500126300,96E,64.982154,-126.5236909,Hare Indian,Prohibition Creek,Core,1805,N09-1805,,59.93,13.46,4.14,2.27,3.12,0.45,2.44,0.55,0.08,0.02,0.013,160,12,13.1,99.62,1671,0.1671,1,12.7,7.6,15,2.3,8.1,122.8,2,305.9,0.7,8.2,13,343,1.6,80.1,24.5,28.8,46,6.06,22.8,4.12,0.98,4.11,0.57,3.29,0.68,1.95,0.27,1.85,0.29,4.92,2.33,68,39.8,11.2,268,140.3,18.6,1.8,1.8,0.2,0.3,3.9,0.17,2.1,7.3,1805,70.4,1.99,4.14,0.32,0.18,468,508,0.04,0.52,3.87,3.35,107,1,5,
"Kabanov et al., 2015, GSC OF7948",well,Little Bear N-09,300N096500126300,96E,64.982154,-126.5236909,Hare Indian,Prohibition Creek,Core,1805.5,N09-1805.5,,43.7,10.33,4.85,6.13,11.32,0.33,1.84,0.4,0.07,0.04,0.011,115,9,20.5,99.59,1453,0.1453,5,9.4,6.1,11.5,1.6,6.3,95.1,1,578.6,0.5,6.2,9.8,238,0.7,58.9,20.3,21.9,37.5,4.65,17.3,3.14,0.73,2.97,0.44,2.32,0.56,1.55,0.22,1.48,0.24,6.99,1.65,47.9,25.3,8.1,146,91.4,12,0.9,1.3,0.2,0.2,4.4,0.11,1.8,5.2,1805.5,70.8,1.92,3.47,0.36,0.28,468,508,0.04,0.47,3.27,2.8,106,1,9,
"Kabanov et al., 2015, GSC OF7948",well,Little Bear N-09,300N096500126300,96E,64.982154,-126.5236909,Hare Indian,Prohibition Creek,Core,1806,N09-1806,,62.35,16.18,4.09,1.12,0.52,0.46,2.91,0.62,0.07,0.01,0.016,160,13,11.2,99.58,1947,0.1947,2,15.6,9.7,19.5,2.7,10.3,160.4,2,252,0.7,9.4,12.6,499,1.3,88.2,26.1,35.9,61.9,7.55,28.4,5.12,1.04,4.41,0.65,3.68,0.77,2.2,0.33,2.05,0.33,3.61,2.6,59.1,39,13.9,336,144.4,19.5,2.2,2.2,0.2,0.4,2.8,0.15,3.8,8.3,1806,70.3,1.68,3.5,0.32,0.16,469,509,0.03,0.44,3.45,3.01,101,1,5,
"Kabanov et al., 2015, GSC OF7948",well,Little Bear N-09,300N096500126300,96E,64.982154,-126.5236909,Hare Indian,Francis Creek,Core,1806.5,N09-1806.5,,58.34,16.54,4.39,2.06,2.07,0.44,2.93,0.62,0.06,0.02,0.015,143,14,12.1,99.58,2034,0.2034,1,15.5,10.7,18.5,2.5,9.7,163.4,2,294,0.7,9.7,9.7,414,1.3,86.6,28,34.8,59.8,7.28,27.3,4.88,1.01,4.32,0.66,3.82,0.8,2.39,0.35,2.3,0.36,3.74,2.49,44.6,31.2,12.4,243,135,19.7,1.8,1.6,0.2,0.3,2.5,0.16,2.6,6,1806.5,70.6,1.6,3.23,0.33,0.2,468,508,0.04,0.41,2.95,2.54,109,1,7,
"Kabanov et al., 2015, GSC OF7948",well,Little Bear N-09,300N096500126300,96E,64.982154,-126.5236909,Hare Indian,Francis Creek,Core,1807,N09-1807,,57.04,16.61,4.52,2.32,2.55,0.43,2.94,0.61,0.06,0.02,0.015,139,14,12.5,99.59,2091,0.2091,2,14.8,10.4,18.6,2.3,9.3,163.5,2,295.5,0.7,9.1,10.9,327,1.2,86.2,26.7,34.8,57.1,7.18,26.5,4.84,1.03,4.66,0.64,3.69,0.74,2.21,0.34,2.06,0.33,3.93,2.53,44.2,31.2,12.4,211,123.3,17.6,1.2,1.4,0.2,0.3,2.6,0.15,2.7,5.6,1807,70.9,1.54,3.3,0.32,0.22,467,507,0.03,0.42,3.05,2.63,108,1,7,
"Kabanov et al., 2015, GSC OF7948",well,Little Bear N-09,300N096500126300,96E,64.982154,-126.5236909,Hare Indian,Francis Creek,Core,1807.5,N09-1807.5,,59.13,18.1,4.49,1.46,1.01,0.45,3.16,0.66,0.06,0.01,0.016,146,16,11,99.58,1933,0.1933,3,14.5,10.2,20.1,2.4,10.4,175,2,259.2,0.7,10.1,9.3,431,1.1,85.3,21.2,34.9,59.5,7.18,26.2,4.75,1.07,4.15,0.61,3.41,0.64,2.03,0.29,1.9,0.31,3.23,2.56,47,34.8,14.2,560,145.9,21.9,5.4,1.9,0.3,0.4,2.8,0.15,3.8,6.6,1807.5,70.5,1.54,2.9,0.35,0.17,466,506,0.03,0.38,2.99,2.61,97,1,6,
"Kabanov et al., 2015, GSC OF7948",well,Little Bear N-09,300N096500126300,96E,64.982154,-126.5236909,Hare Indian,Francis Creek,Core,1808,N09-1808,,55.03,16.25,5.36,2.64,3.6,0.42,2.86,0.64,0.06,0.02,0.015,124,15,12.7,99.59,1872,0.1872,3,14.4,9.6,18.5,2.7,10.3,155,3,302.5,0.6,9.5,7.1,348,1.2,90,22.9,33.7,57.2,6.78,24.2,4.27,0.91,3.77,0.56,3.43,0.68,2.01,0.31,2.08,0.33,4.02,2.77,38.8,30,13.8,283,121.6,19.5,2.4,1.7,0.2,0.3,0.9,0.14,3.1,7,1808,71,1.52,2.5,0.38,0.22,460,500,0.02,0.35,2.46,2.11,102,1,9,
"Kabanov et al., 2015, GSC OF7948",well,Little Bear N-09,300N096500126300,96E,64.982154,-126.5236909,Hare Indian,Francis Creek,Core,1808.5,N09-1808.5,,57.97,17.02,4.94,1.67,1.61,0.47,2.96,0.75,0.08,0.02,0.016,146,14,12.1,99.58,2099,0.2099,3,15.8,9.9,19.1,2.9,11.4,164.1,2,265.8,0.9,11.1,11,400,1.3,105.5,26,34.6,62,7.52,29.1,5,1.08,4.91,0.73,3.99,0.8,2.35,0.33,2.18,0.35,3.71,2.66,42.2,32.9,13.7,224,125.3,17.6,1.9,1.9,0.2,0.2,2.1,0.14,2.5,6.5,1808.5,70.5,2.21,3.89,0.36,0.22,468,508,0.04,0.52,3.58,3.06,109,1,6,
"Kabanov et al., 2015, GSC OF7948",well,Little Bear N-09,300N096500126300,96E,64.982154,-126.5236909,Hare Indian,Francis Creek,Core,1809,N09-1809,,47.11,14.84,5.72,4.38,7.49,0.39,2.6,0.56,0.05,0.03,0.014,106,13,16.3,99.49,2730,0.273,3,12.1,9.1,16,2,8.9,134.5,3,390,0.5,8.5,5.4,269,1.8,74.5,22.2,29.3,46.8,5.82,21.4,3.82,0.83,3.54,0.54,3.12,0.66,1.94,0.29,2.07,0.31,4.84,2.1,27.4,22.3,10.6,136,83.1,13.7,1,1.3,0.2,0.1,2.5,0.1,2.3,4.4,1809,70.5,1.37,2.23,0.38,0.35,458,498,0.04,0.32,2.09,1.77,107,2,17,
"Kabanov et al., 2015, GSC OF7948",well,Little Bear N-09,300N096500126300,96E,64.982154,-126.5236909,Hare Indian,Francis Creek,Core,1809.5,N09-1809.5,,60.47,17.73,4.86,1,0.37,0.44,3.01,0.66,0.05,0.01,0.017,131,15,11,99.6,2071,0.2071,2,15.6,10.8,20.6,2.6,9.7,167.7,2,242.7,0.6,9.7,5.4,385,1.2,90.7,20.8,31.6,53.9,6.48,24.7,4.15,0.86,3.61,0.54,3.07,0.68,1.93,0.29,1.94,0.3,2.45,3.07,34.4,28.8,14.3,264,124.8,21.5,2,1.6,0.2,0.4,2.8,0.17,3.8,8.8,1809.5,70.5,1.7,2.43,0.41,0.16,459,499,0.03,0.36,2.48,2.12,98,1,6,
"Kabanov et al., 2015, GSC OF7948",well,Little Bear N-09,300N096500126300,96E,64.982154,-126.5236909,Hare Indian,Francis Creek,Core,1810,N09-1810,,56.27,17.98,5.38,1.79,2.06,0.44,3.06,0.69,0.05,0.02,0.015,103,16,11.7,99.49,2881,0.2881,2,15,9.8,19.1,2.7,10.4,157.9,2,282.6,0.7,9.9,5,260,0.8,89.5,21,33,58.7,6.71,24.3,4.25,0.88,3.95,0.58,3.44,0.71,2.05,0.29,2.09,0.31,2.65,2.93,24.7,25.7,13.4,323,98.4,19.9,2.6,1.2,0.3,0.2,2.3,0.14,2.9,4.5,1810,70.6,1.42,1.82,0.44,0.2,329,369,0.03,0.28,1.7,1.42,107,2,12,
"Kabanov et al., 2015, GSC OF7948",well,Little Bear N-09,300N096500126300,96E,64.982154,-126.5236909,Hare Indian,Francis Creek,Core,1810.5,N09-1810.5,,55.1,17.84,5.52,2.13,2.84,0.45,2.99,0.69,0.05,0.02,0.015,100,17,11.9,99.54,2690,0.269,3,15.8,9.5,19.8,2.8,10.7,159.4,2,292,0.9,10.4,5.3,251,1.9,94.1,21.5,35.5,61.2,7.19,25.4,4.55,1.01,4.06,0.6,3.58,0.71,2.16,0.34,2.03,0.32,2.65,2.75,19.7,26.1,13,242,91.6,17,2.2,1,0.2,0.2,2,0.13,2.8,4.3,1810.5,70.6,1.59,2.08,0.43,0.19,329,369,0.02,0.32,1.78,1.46,117,1,11,
"Kabanov et al., 2015, GSC OF7948",well,Little Bear N-09,300N096500126300,96E,64.982154,-126.5236909,Hare Indian,Francis Creek,Core,1811,N09-1811,,55.91,17.76,5.38,1.85,2.18,0.44,2.99,0.69,0.04,0.02,0.014,101,16,12.3,99.59,2176,0.2176,4,16.6,9.3,19.7,2.7,10,160.9,2,286.6,0.8,10.3,4.7,266,1.5,90.1,20.5,32.7,58.5,6.72,22.8,4.16,0.8,3.68,0.57,3.32,0.63,2.17,0.31,1.95,0.32,2.73,3.03,24.7,24.3,13.5,184,105.5,19.1,1,0.9,0.2,0.2,1.5,0.16,2.6,6.3,1811,70.8,1.68,2.11,0.44,0.21,335,375,0.03,0.33,1.88,1.55,112,2,11,
"Kabanov et al., 2015, GSC OF7948",well,Little Bear N-09,300N096500126300,96E,64.982154,-126.5236909,Hare Indian,Francis Creek,Core,1811.5,N09-1811.5,,55.08,18.14,5.51,1.89,2.24,0.44,3.1,0.71,0.04,0.02,0.016,116,16,12.4,99.59,2221,0.2221,6,17.3,10.5,20.7,2.5,11.3,167,3,293,0.8,11,5.4,255,2,91.9,21.9,35,62,7.13,26.1,4.6,0.91,3.83,0.59,3.74,0.64,2.07,0.33,2.2,0.32,2.75,3.03,27,26.2,13.9,174,112,18.7,0.9,0.9,0.3,0.2,2,0.15,3.3,5.2,1811.5,70,1.38,2.02,0.41,0.19,500,540,0.03,0.3,1.76,1.46,115,2,11,
"Kabanov et al., 2015, GSC OF7948",well,Little Bear N-09,300N096500126300,96E,64.982154,-126.5236909,Hare Indian,Bluefish,Core,1812,N09-1812,,58.76,17.8,4.01,1.04,0.46,0.51,2.85,0.68,0.12,<0.01,0.019,197,15,13.2,99.49,2414,0.2414,6,17.1,9,20.6,2.9,10.3,148.3,2,264.4,0.7,10.4,11.9,521,1.6,98.5,29,37.6,63.2,8.44,32.6,5.85,1.36,5.85,0.79,4.61,0.89,2.42,0.35,2.35,0.35,4.99,2.44,56.3,49.6,16.6,638,171.6,16.4,7.1,4.1,0.3,1,1.8,0.14,3.3,14.4,1812,70.8,2.83,5.34,0.35,0.21,468,508,0.05,0.69,4.94,4.25,108,1,4,
"Kabanov et al., 2015, GSC OF7948",well,Little Bear N-09,300N096500126300,96E,64.982154,-126.5236909,Hare Indian,Bluefish,Core,1812.5,N09-1812.5,,58.62,19.3,4.1,0.95,0.23,0.46,3.1,0.67,0.1,0.01,0.015,114,15,12.1,99.64,2120,0.212,2,19.7,12.1,22.9,2.7,11,168.6,2,275.9,0.7,10.9,10.8,169,1.5,90.9,25.7,35.7,66.6,8.18,31.9,6.05,1.4,6.08,0.83,4.49,0.86,2.31,0.34,1.99,0.32,3.09,2.53,38.1,31.8,16.2,147,112.3,13.9,1,2.4,0.3,<0.1,1.3,0.19,2.8,3.3,1812.5,70.6,2.37,4.04,0.37,0.18,465,505,0.04,0.55,3.33,2.78,121,1,5,
"Kabanov et al., 2015, GSC OF7948",well,Little Bear N-09,300N096500126300,96E,64.982154,-126.5236909,Hare Indian,Bluefish,Core,1813,N09-1813,,37.58,11.82,11.43,5.27,9.06,0.33,1.78,0.42,0.07,0.06,0.009,91,10,21.8,99.61,1848,0.1848,2,14.4,6.2,12.1,1.7,6.5,89.5,1,329.7,0.4,6.6,8.9,111,0.8,59,26.4,29.8,48.8,5.98,22.9,4.01,1.05,4.3,0.62,3.48,0.71,2.29,0.3,2.04,0.3,7.91,6.33,22.6,31.7,15.6,82,75.7,24,0.6,4.6,0.2,<0.1,2.4,0.22,1.1,3.7,1813,70.6,3.5,4.95,0.41,0.33,462,502,0.03,0.72,4.39,3.67,113,1,8,
"Kabanov et al., 2015, GSC OF7948",well,Little Bear N-09,300N096500126300,96E,64.982154,-126.5236909,Hare Indian,Bluefish,Core,1813.5,N09-1813.5,,55.8,17.28,3.59,1.31,0.84,0.5,2.76,0.67,0.09,<0.01,0.021,241,12,16.6,99.5,1904,0.1904,3,14.9,10.2,19,2.9,10.8,142.2,2,223.8,0.8,10.4,28.8,643,1.2,101.6,26.4,35.1,60.1,7.93,29.5,5.43,1.2,5.15,0.72,4.16,0.8,2.33,0.33,2.16,0.34,8.21,2.07,76.1,61.3,14.5,801,189.8,21.8,9.2,5.3,0.3,0.8,1.7,0.15,2.3,14.5,1813.5,50.3,4.25,9.14,0.32,0.21,469,509,0.05,1.14,8.26,7.12,111,1,3,
"Kabanov et al., 2015, GSC OF7948",well,Little Bear N-09,300N096500126300,96E,64.982154,-126.5236909,Hare Indian,Bluefish,Core,1814,N09-1814,,28.39,7.64,7.33,8.23,16.61,0.3,1.46,0.37,0.08,0.06,0.011,182,9,29,99.55,937,0.0937,3,9.7,3.9,8,1.6,5.4,65.6,<1,647.7,0.3,5.1,27.7,340,0.9,62.3,40.2,32.9,46.9,6.48,24.6,4.56,1.08,4.94,0.74,4.49,0.99,3.06,0.43,2.78,0.44,11.74,2.59,90,41.6,12.4,223,135.5,25.4,2.2,10,0.2,0.4,1.5,0.15,2.6,13,1814,70.9,4.16,6.05,0.41,0.32,464,504,0.06,0.87,6.14,5.27,99,1,5,
"Kabanov et al., 2015, GSC OF7948",well,Little Bear N-09,300N096500126300,96E,64.982154,-126.5236909,Hare Indian,Bluefish,Core,1814.5,N09-1814.5,,46.56,14.29,9.32,1.13,3.72,0.39,2.33,0.57,0.1,0.02,0.015,370,12,20.4,98.88,7680,0.768,3,25.7,9.8,15.8,2.6,10.3,131.4,3,309.2,0.6,8.7,47,661,1.5,93.3,37.9,41.9,62.1,9.06,34.6,6.55,1.48,6.44,0.93,5.34,1.03,2.88,0.44,2.56,0.41,9.42,7.06,150.6,85.8,37.2,186,317,47.5,2.1,24.6,0.5,2.1,1.9,0.56,3.8,40.1,1814.5,70.7,4.2,8.89,0.32,0.34,464,504,0.06,1.11,8.87,7.76,100,1,4,
"Kabanov et al., 2015, GSC OF7948",well,Little Bear N-09,300N096500126300,96E,64.982154,-126.5236909,Hare Indian,Bluefish,Core,1815,N09-1815,,55.11,15.56,4.61,1.69,2.42,0.47,2.73,0.61,0.08,0.01,0.018,355,14,16.2,99.57,1382,0.1382,2,15.6,9.2,17.5,2.6,10.5,148.5,2,262.6,0.5,9.4,40.6,530,1.4,102.7,33.3,39.5,58.5,8.4,31.9,5.85,1.24,5.62,0.81,4.81,1.04,2.89,0.4,2.69,0.42,7.6,2.74,172,65.9,15.7,609,296.1,27.4,6,11.1,0.3,0.7,1.1,0.24,6,15.3,1815,69.8,3.18,7.54,0.3,0.21,464,504,0.05,0.91,7.34,6.43,103,1,3,
"Kabanov et al., 2015, GSC OF7948",well,Little Bear N-09,300N096500126300,96E,64.982154,-126.5236909,Hare Indian,Bluefish,Core,1815.5,N09-1815.5,,58.59,14.83,3.83,1.17,2.44,0.49,2.65,0.7,0.07,0.01,0.019,261,13,14.6,99.48,1450,0.145,5,14.9,9,17,4.2,12.3,143.4,2,256.1,0.7,10.9,27.3,796,1.2,151.7,39.2,46.7,70.4,10.01,38.7,7.01,1.49,6.62,0.98,5.75,1.19,3.46,0.52,3.18,0.52,6.53,2.25,111.9,58.8,18.4,1089,236.8,23.3,13.5,11.8,0.3,1.8,1.5,0.22,4.9,19.6,1815.5,69.8,3.19,7.29,0.3,0.23,465,505,0.03,0.88,6.29,5.41,116,0,4,
"Kabanov et al., 2015, GSC OF7948",well,Little Bear N-09,300N096500126300,96E,64.982154,-126.5236909,Hare Indian,Bluefish,Core,1816.1,N09-1816.1,,55.53,16,4.73,2.28,3.4,0.39,2.55,0.61,0.06,0.02,0.014,222,12,14,99.63,1812,0.1812,2,14.8,10.1,17.9,2.6,11,150.1,2,302,0.6,9,12.3,221,2,91.3,23.9,36.1,51.6,6.92,25.5,4.09,0.82,3.82,0.57,3.4,0.69,2.12,0.34,2.2,0.34,4.52,2.44,74.7,34.9,13.2,242,178,35.6,1.5,10.3,0.3,0.7,1.3,0.18,5.3,6.1,1816.1,70.8,2.54,4.01,0.39,0.2,462,502,0.02,0.56,3.37,2.81,119,1,6,
"Kabanov et al., 2015, GSC OF7948",well,Little Bear N-09,300N096500126300,96E,64.982154,-126.5236909,Hare Indian,Bluefish,Core,1816.5,N09-1816.5,,53.65,15.99,4.12,2.97,4.38,0.4,2.61,0.61,0.07,0.02,0.014,169,14,14.8,99.64,1580,0.158,3,13.7,9.6,17.2,2.3,10.6,149,2,329.2,0.7,9.5,11.3,226,1.3,82.1,22.3,33.9,55.1,6.97,26.5,4.47,0.92,4.17,0.6,3.54,0.68,2.16,0.29,1.99,0.33,5.12,2,54.8,33.9,12.6,209,143.3,21.5,1.2,4.9,0.2,0.2,2.1,0.17,3.5,6.9,1816.5,71,2.28,4.08,0.36,0.21,468,508,0.03,0.55,3.54,2.99,115,1,6,
"Kabanov et al., 2015, GSC OF7948",well,Little Bear N-09,300N096500126300,96E,64.982154,-126.5236909,Hare Indian,Bluefish,Core,1817,N09-1817,,60.39,15.64,4.53,1.58,1.82,0.4,2.58,0.56,0.07,0.01,0.014,171,14,12,99.58,2151,0.2151,3,14.1,9.8,16.9,2,8.7,147.9,2,262.3,0.6,8.3,9.1,300,0.9,75.7,20.5,30,50.3,6.38,24.9,4.26,0.92,4.09,0.57,3.49,0.64,1.96,0.28,1.91,0.29,3.9,2.76,51.8,32,12,332,150.2,29.2,2.1,3.9,0.2,0.3,1.7,0.21,4,6.9,1817,71,2.52,4.54,0.36,0.2,466,506,0.03,0.6,3.49,2.89,130,1,6,
"Kabanov et al., 2015, GSC OF7948",well,Little Bear N-09,300N096500126300,96E,64.982154,-126.5236909,Hare Indian,Bluefish,Core,1817.5,N09-1817.5,,60.69,15,4.8,1.42,1.7,0.42,2.65,0.58,0.06,0.01,0.013,171,13,12.3,99.63,2088,0.2088,<1,13.7,9.4,16.2,2,9.9,142.9,2,261.7,0.7,8.6,11.2,185,0.8,74.3,21.3,32.2,53.4,6.66,25.1,4.26,0.9,3.8,0.55,3.13,0.68,1.89,0.29,1.86,0.28,4.33,3.01,67.2,35.6,12.8,218,147.6,18.5,1,1.6,0.2,0.2,2.1,0.23,3.5,7,1817.5,70.8,2.63,4.73,0.36,0.23,465,505,0.04,0.63,3.84,3.21,123,1,6,
"Kabanov et al., 2015, GSC OF7948",well,Little Bear N-09,300N096500126300,96E,64.982154,-126.5236909,Hare Indian,Bluefish,Core,1818,N09-1818,,62.58,14.83,3.28,1.44,2.57,0.41,2.64,0.56,0.07,0.01,0.013,141,13,11.2,99.59,2331,0.2331,2,12.6,8.5,16.5,2,9.4,147.8,3,288.5,0.6,8.2,10,198,1.1,74,21.3,29.6,53,6.47,25.6,4.28,0.89,4.12,0.58,3.21,0.67,2.04,0.3,1.82,0.29,3.56,1.63,46.4,32.3,11.8,174,122,14.1,0.9,1.2,0.2,0.2,0.9,0.18,2.7,4.4,1818,70.5,2.42,4.56,0.35,0.18,468,508,0.03,0.59,3.42,2.83,133,1,5,
"Kabanov et al., 2015, GSC OF7948",well,Little Bear N-09,300N096500126300,96E,64.982154,-126.5236909,Hare Indian,Bluefish,Core,1818.5,N09-1818.5,,60.25,14.35,3.68,2.13,3.29,0.39,2.45,0.53,0.04,0.02,0.012,139,12,12.5,99.63,1985,0.1985,4,12.3,7.7,16,2,8.4,136.2,2,295.9,0.5,7.9,8.3,178,1.4,68.9,19,28.1,48.1,5.76,21.4,3.56,0.71,3.21,0.5,2.75,0.6,1.76,0.27,1.83,0.29,4.13,1.83,44.5,27.5,9.6,177,112.2,12.5,1.1,1.2,0.2,0.1,0.8,0.16,2,4,1818.5,70.4,2.04,3.7,0.36,0.22,470,510,0.02,0.49,3.14,2.65,118,1,7,
"Kabanov et al., 2015, GSC OF7948",well,Little Bear N-09,300N096500126300,96E,64.982154,-126.5236909,Hare Indian,Bluefish,Core,1819,N09-1819,,60.43,15.69,3.69,1.42,2.21,0.43,2.63,0.59,0.07,0.02,0.013,168,13,12.5,99.67,1632,0.1632,2,14.3,9.6,18,2.3,9.8,145.5,3,272.6,0.5,9.5,11.1,211,1.8,75.7,19.9,30.7,51.4,6.33,23,3.97,0.9,3.56,0.55,3.21,0.6,1.9,0.3,1.81,0.26,4.66,2.23,62.4,34.2,11.1,233,141.2,14.7,1.2,1.4,0.2,0.2,2.3,0.22,2.4,4.3,1819,70.6,2.14,4.1,0.34,0.21,470,510,0.03,0.53,3.98,3.45,103,1,5,
"Kabanov et al., 2015, GSC OF7948",well,Little Bear N-09,300N096500126300,96E,64.982154,-126.5236909,Hare Indian,Bluefish,Core,1819.5,N09-1819.5,,48.7,12.17,5.09,4.32,8.45,0.35,2.1,0.46,0.05,0.04,0.01,131,11,17.9,99.64,1529,0.1529,3,10.3,6.7,13.9,1.6,7.9,115.6,2,440.1,0.6,7,10.9,140,1.2,62.4,23.8,29.4,47.8,6.26,23.1,4.4,0.94,3.89,0.57,3.57,0.73,2.1,0.31,1.98,0.31,6.01,2.17,59.2,26.8,9.3,163,110.7,13.1,0.6,1.3,0.2,0.1,1.1,0.15,1.9,4.1,1819.5,70,2.01,3.52,0.36,0.29,466,506,0.03,0.47,3.19,2.72,110,1,9,
"Kabanov et al., 2015, GSC OF7948",well,Little Bear N-09,300N096500126300,96E,64.982154,-126.5236909,Hare Indian,Bluefish,Core,1820,N09-1820,,61.27,15.34,3.35,1.36,2.25,0.43,2.71,0.55,0.04,0.01,0.013,186,13,12.3,99.66,1624,0.1624,3,13.9,8.8,18,2,9.1,151.9,3,276.5,0.5,8.2,14.2,228,1,71.6,19.5,29.3,49.9,6.23,23.8,4.17,0.79,3.48,0.5,3,0.61,1.79,0.29,1.78,0.31,4.58,1.92,85.7,39.9,10.3,201,145.8,11.7,1.4,1.2,0.2,0.2,2.6,0.16,2.1,6.2,1820,70.7,2.1,4.23,0.33,0.25,467,507,0.03,0.54,3.97,3.43,107,1,6,
"Kabanov et al., 2015, GSC OF7948",well,Little Bear N-09,300N096500126300,96E,64.982154,-126.5236909,Hare Indian,Bluefish,Core,1820.5,N09-1820.5,,58.47,15.69,4.08,1.57,2.26,0.43,2.81,0.61,0.07,0.02,0.014,209,14,13.5,99.56,2355,0.2355,6,13.9,9.9,18.3,2.2,10.3,160,2,286.3,0.7,8.5,18.1,246,1.6,80.1,23.9,31.9,55.3,7.2,26.5,5,0.97,4.39,0.65,3.63,0.74,2.35,0.33,2.15,0.32,5.1,2.61,83.2,39.5,11.2,247,156.5,20.7,1.8,2.2,0.2,0.2,<0.5,0.26,3,5.9,1820.5,70.8,2.39,4.87,0.33,0.23,466,506,0.03,0.62,4.51,3.89,108,1,5,
"Kabanov et al., 2015, GSC OF7948",well,Little Bear N-09,300N096500126300,96E,64.982154,-126.5236909,Hare Indian,Bluefish,Core,1821,N09-1821,,61.97,14.57,3.42,1.69,2.24,0.43,2.63,0.56,0.06,0.01,0.014,208,13,11.9,99.54,2253,0.2253,3,12.1,8.9,16.7,2,9.4,148.8,2,262.2,0.6,8.4,16.6,427,1.3,78.4,22.5,29.2,47,5.95,22.8,3.65,0.75,3.32,0.51,3.05,0.69,2.03,0.3,2,0.31,4.42,2.03,66.1,36.1,10.8,386,157.5,26.6,3,4.3,0.2,0.5,0.9,0.19,3.4,8.9,1821,70.3,2.03,4.3,0.32,0.35,470,510,0.13,0.55,3.9,3.35,110,3,9,
"Kabanov et al., 2015, GSC OF7948",well,Little Bear N-09,300N096500126300,96E,64.982154,-126.5236909,Hare Indian,Bluefish,Core,1821.5,N09-1821.5,,72.32,8.92,2.46,0.71,1.82,0.34,1.62,0.33,0.09,<0.01,0.01,252,8,11,99.69,1485,0.1485,<1,8.7,5.4,10.2,1.6,6,89.7,1,189.7,0.4,4.7,22.2,270,0.8,57.4,23.4,23.2,31.4,4.73,17.6,3.35,0.75,3.43,0.49,2.97,0.64,1.81,0.26,1.63,0.25,5.25,1.69,90.7,44.4,8,315,188,18.5,2.8,4.6,0.1,0.2,1.3,0.19,2.5,11.2,1821.5,70.9,2.54,5.8,0.3,0.14,467,507,0.03,0.7,5.1,4.4,114,1,3,
"Kabanov et al., 2015, GSC OF7948",well,Little Bear N-09,300N096500126300,96E,64.982154,-126.5236909,Hare Indian,Bluefish,Core,1822,N09-1822,,71.77,7.12,1.94,0.7,4.45,0.31,1.29,0.29,0.08,<0.01,0.008,219,8,11.7,99.68,1593,0.1593,<1,6.7,4.1,8.2,1.3,4.8,65.9,1,225,0.4,3.8,26.4,262,1.2,52.5,27.8,22.3,29.7,4.57,16.9,3.23,0.69,3.28,0.5,3.17,0.65,1.93,0.29,2,0.32,5.51,1.29,91.1,33.8,5.5,296,153.3,13.8,2.4,4.2,0.1,0.3,1.1,0.19,2.9,7.8,1822,70.3,3.33,6.44,0.34,0.23,462,502,0.05,0.83,5.11,4.28,126,1,5,
"Kabanov et al., 2015, GSC OF7948",well,Little Bear N-09,300N096500126300,96E,64.982154,-126.5236909,Hare Indian,Bluefish,Core,1822.5,N09-1822.5,,76.19,7.01,1.76,0.59,1.95,0.29,1.24,0.26,0.08,<0.01,0.008,217,6,10.3,99.71,1548,0.1548,4,6.2,3.9,7.8,1.3,4.6,64.6,<1,175.6,0.2,3.3,18.1,214,0.6,47.4,18.9,18.1,24.2,3.72,14.9,2.52,0.57,2.74,0.39,2.24,0.49,1.4,0.22,1.23,0.19,5.14,1.21,93.3,36,6.1,279,157.6,13.4,2.3,4,0.1,0.2,4.2,0.19,2.9,7.4,1822.5,70.3,4.16,6.93,0.38,0.21,452,492,0.12,0.94,4.99,4.05,139,2,4,
"Kabanov et al., 2015, GSC OF7948",well,Little Bear N-09,300N096500126300,96E,64.982154,-126.5236909,Hare Indian,Bluefish,Core,1823,N09-1823,,76.3,5.8,1.58,0.57,3.07,0.26,1.03,0.22,0.07,<0.01,0.006,199,5,10.8,99.73,1515,0.1515,1,5.5,3,7.6,1.1,4.3,56,<1,195.4,0.3,2.7,16.8,172,0.8,41,16.9,15.3,19,3.12,12.3,2.19,0.47,2.34,0.32,1.89,0.43,1.35,0.18,1.17,0.18,6.09,1.2,86.1,34.7,5.4,189,135.6,11.6,1.5,3.7,0.1,0.2,6.8,0.16,1.8,6.8,1823,70.3,5.55,7.27,0.43,0.32,445,485,0.04,1.09,5.09,4,143,1,6,
"Kabanov et al., 2015, GSC OF7948",well,Little Bear N-09,300N096500126300,96E,64.982154,-126.5236909,Hare Indian,Bluefish,Core,1823.5,N09-1823.5,,67.49,7.78,2.56,0.9,5.86,0.33,1.43,0.33,0.13,<0.01,0.011,439,6,12.7,99.59,1327,0.1327,6,8.2,4.2,10.3,1.6,6.7,72.9,<1,295.6,0.4,4.4,24,500,0.7,62.9,28.2,24.4,30.3,5.02,18.7,3.33,0.74,3.42,0.5,2.96,0.66,1.93,0.28,1.71,0.27,6.47,2.01,137,59,11.4,769,302,25.1,4.7,10.2,0.2,0.8,6.2,0.23,3.5,11.9,1823.5,71,2.78,5.26,0.35,0.27,461,501,0.04,0.69,5.07,4.38,104,1,5,
"Kabanov et al., 2015, GSC OF7948",well,Little Bear N-09,300N096500126300,96E,64.982154,-126.5236909,Hare Indian,Bluefish,Core,1824,N09-1824,,68.09,10.12,2.59,0.94,3.23,0.39,1.94,0.41,0.08,<0.01,0.012,308,8,11.8,99.63,1350,0.135,1,9.4,6.2,13.1,1.9,8.4,103.3,<1,241.8,0.5,5,25.2,555,0.8,77,25.1,25.7,35.5,5.45,22,3.85,0.76,3.9,0.54,3.25,0.71,2,0.28,1.92,0.27,5.75,1.89,130.6,60.8,11.6,456,225,24.5,3.6,9.6,0.3,0.8,5.5,0.2,2.9,11.3,1824,70.4,2.26,4.94,0.31,0.24,466,506,0.12,0.62,4.78,4.16,103,3,5,
"Kabanov et al., 2015, GSC OF7948",well,Little Bear N-09,300N096500126300,96E,64.982154,-126.5236909,Hare Indian,Bluefish,Core,1824.5,N09-1824.5,,59.42,11.6,4.65,1.9,4.92,0.39,2.23,0.46,0.06,0.02,0.011,243,10,14,99.68,1273,0.1273,8,11,7.5,15.1,2.1,8.8,121.2,<1,297.8,0.6,6.7,19.3,268,1,79.6,19.7,24.5,36.8,5.18,18.8,3.59,0.66,3.19,0.45,2.76,0.59,1.76,0.26,1.75,0.27,5.82,3.48,130.3,65.9,16.7,184,203.6,28.2,1.6,7.6,0.2,0.3,4.4,0.37,4.1,12.8,1824.5,70.3,2.13,3.7,0.37,0.24,467,507,0.15,0.51,4.41,3.9,84,3,5,
"Kabanov et al., 2015, GSC OF7948",well,Little Bear N-09,300N096500126300,96E,64.982154,-126.5236909,Hare Indian,Bluefish,Core,1825,N09-1825,,68.25,9.45,3.51,1.05,1.54,0.39,1.97,0.52,0.07,0.01,0.013,245,10,12.8,99.59,1085,0.1085,4,10.1,5.6,11.6,2.7,9.6,91.7,<1,182.7,0.6,6.1,18.2,831,0.8,114.4,26,28.3,43.6,6.32,24.5,4.31,0.82,4.04,0.58,3.67,0.78,2.3,0.34,2.31,0.36,6.55,2.65,110.3,70.7,15.1,642,198,23.7,18,7.6,0.3,0.4,4.5,0.3,2.9,20.7,1825,70.6,3.37,5.6,0.38,0.22,470,510,0.04,0.76,6.07,5.31,92,1,4,
"Kabanov et al., 2015, GSC OF7948",well,Little Bear N-09,300N096500126300,96E,64.982154,-126.5236909,Hare Indian,Bluefish,Core,1825.5,N09-1825.5,,65.82,9.09,3.29,1.58,3.55,0.37,1.88,0.47,0.07,0.02,0.016,226,11,13.4,99.6,935,0.0935,6,8.4,4.7,11.2,2.3,8.2,83.6,<1,229.1,0.4,5.3,12.8,680,0.6,99.9,24.6,27.2,39.9,5.8,21.7,4.02,0.83,3.66,0.56,3.31,0.74,2.35,0.36,2.55,0.38,7.07,2.48,74.8,69.1,11.8,779,176.4,17,24.9,5.8,0.2,0.4,2.5,0.26,1.5,18.6,1825.5,70.1,2.54,5.75,0.31,0.2,470,510,0.03,0.71,6.1,5.39,94,0,3,
"Kabanov et al., 2015, GSC OF7948",well,Little Bear N-09,300N096500126300,96E,64.982154,-126.5236909,Hare Indian,Bluefish,Core,1826,N09-1826,,68.66,8.93,2.5,1.02,2.28,0.38,1.83,0.42,0.08,0.01,0.016,228,10,13.5,99.68,1070,0.107,2,8.8,4.7,11.7,2.3,8.8,84.7,<1,207.2,0.5,5.1,18.4,503,0.8,99.1,28,27.3,38.5,6.17,24.3,4.37,0.96,4.21,0.6,3.63,0.73,2.28,0.35,2.24,0.37,7.94,1.93,82.9,80.9,11.7,405,170.3,12.3,18.9,4.7,0.2,0.4,4.5,0.27,0.9,21.7,1826,70.4,3.17,7.59,0.3,0.24,472,512,0.05,0.91,7.3,6.39,104,1,3,
"Kabanov et al., 2015, GSC OF7948",well,Little Bear N-09,300N096500126300,96E,64.982154,-126.5236909,Hare Indian,Bluefish,Core,1826.5,N09-1826.5,,16.56,2.82,0.82,0.78,41.5,0.11,0.56,0.12,0.05,0.03,0.004,61,3,36.2,99.55,2542,0.2542,2,3.5,1.5,3.5,0.5,2.4,26.6,<1,959.9,0.2,1.7,4.2,93,<0.5,25.8,12.9,16.7,16.4,2.6,10.3,1.73,0.4,1.87,0.27,1.52,0.33,0.92,0.14,0.87,0.12,11.65,0.63,22.8,13.8,2.4,32,39.2,3.8,1.2,0.8,<0.1,<0.1,3.4,0.06,0.4,3.1,1826.5,70.8,1.09,1.44,0.43,0.34,464,504,0.04,0.23,1.39,1.16,104,3,24,
"Kabanov et al., 2015, GSC OF7948",well,Little Bear N-09,300N096500126300,96E,64.982154,-126.5236909,Hare Indian,Bluefish,Core,1826.85,N09-1826.85,,54.76,6.38,1.65,1.06,15.11,0.24,1.28,0.27,0.08,0.02,0.009,129,6,18.9,99.74,897,0.0897,4,5.3,3.2,7.9,1.5,5.1,61.4,<1,388.2,0.3,3.7,6.4,320,0.6,55.9,16.8,17.9,25,3.69,13.7,2.52,0.54,2.56,0.36,2.15,0.45,1.33,0.19,1.22,0.21,7.79,1.27,42.1,35.7,7.1,179,96.8,7.7,8.2,2.2,0.1,0.2,2.1,0.11,0.6,9,1826.85,70.3,2.59,4.76,0.35,0.26,470,510,0.03,0.63,4.65,4.02,102,1,6,
"Kabanov et al., 2015, GSC OF7948",well,Little Bear N-09,300N096500126300,96E,64.982154,-126.5236909,Hare Indian,Bluefish,Core,1827.5,N09-1827.5,,73.01,8.12,2.18,0.78,1.8,0.32,1.63,0.36,0.14,<0.01,0.013,238,8,11.3,99.69,900,0.09,2,7.6,4.2,10.2,1.7,6.6,80.9,<1,196.2,0.5,4.6,14.3,637,0.8,74.4,29.1,27,34.6,5.85,23.9,4.61,0.95,4.67,0.63,3.8,0.75,2.25,0.28,1.89,0.31,6.31,1.68,71.3,61.4,11,449,184,9.5,19.3,3.7,0.2,0.3,2.5,0.21,0.9,20.1,1827.5,70.3,2.05,5.95,0.26,0.15,473,513,0.02,0.68,5.89,5.21,101,0,3,
"Kabanov et al., 2015, GSC OF7948",well,Little Bear N-09,300N096500126300,96E,64.982154,-126.5236909,Hare Indian,Bluefish,Core,1828,N09-1828,,69.25,9.9,3.38,1.03,1.49,0.4,2.01,0.44,0.07,0.01,0.014,216,9,11.6,99.64,1789,0.1789,4,9.1,4.6,12.3,2.4,7.9,93.6,<1,180.2,0.5,5.1,11.5,429,0.8,84.9,22.7,24,35.1,5.31,21,3.8,0.78,3.54,0.51,2.95,0.67,1.87,0.28,1.81,0.27,6.09,2.63,52.1,57.9,11.9,256,178.3,8.8,11.1,3,0.2,0.2,2.2,0.25,1.2,25.6,1828,70.5,2.46,5.25,0.32,0.16,473,513,0.04,0.66,5.48,4.82,96,1,3,
"Kabanov et al., 2015, GSC OF7948",well,Little Bear N-09,300N096500126300,96E,64.982154,-126.5236909,Hare Indian,Bluefish,Core,1828.4,N09-1828.4,,26.94,4.02,1.11,0.62,34.38,0.15,0.44,0.1,0.05,<0.01,0.005,103,9,31.8,99.64,643,0.0643,1,2.9,1.2,2.8,0.5,1.9,19.4,<1,1462.8,<0.1,1.5,11.7,193,<0.5,21.9,35.8,27.3,26.3,5.01,19.9,3.45,0.87,3.72,0.55,3.57,0.79,2.46,0.37,2.61,0.41,10.4,1.02,20,20.1,4.1,332,71.1,4,11.5,1.4,<0.1,<0.1,2.6,0.09,0.7,8.7,1828.4,70.2,1.7,3.36,0.34,0.25,472,512,0.02,0.44,3.81,3.37,88,1,7,
"Kabanov et al., 2015, GSC OF7948",well,Little Bear N-09,300N096500126300,96E,64.982154,-126.5236909,Hume,,Core,1828.7,N09-1828.7,,15.4,2.17,1.92,0.61,42.68,0.04,0.43,0.13,0.05,<0.01,0.005,104,2,36.1,99.56,2906,0.2906,<1,2.5,0.9,2.4,0.7,2.1,17.6,<1,389.9,0.1,1.7,11.1,160,<0.5,24.9,10.9,14,11.5,1.99,8.2,1.12,0.23,1.21,0.16,1.02,0.22,0.86,0.12,0.85,0.12,11.22,1.71,24.4,28,4.8,137,76.2,2.9,5.8,1.5,<0.1,0.1,3.2,0.09,0.6,18.9,1828.7,70.4,1.9,2.49,0.43,0.3,461,501,0.04,0.38,3.19,2.81,78,1,9,
"Kabanov et al., 2015, GSC OF7948",well,Little Bear N-09,300N096500126300,96E,64.982154,-126.5236909,Hume,,Core,1829,N09-1829,,4.38,1.87,5.64,1.02,48.58,0.03,0.21,0.07,0.11,<0.01,0.003,90,2,37.9,99.81,552,0.0552,2,2.6,0.2,1.5,0.4,1.4,9.7,<1,474.1,<0.1,1.3,14.7,54,0.8,13.5,8.2,9.3,10.2,1.64,6.4,1.1,0.24,1.15,0.17,0.92,0.21,0.71,0.1,0.55,0.1,11.23,4.44,12.2,25,14.7,72,72,37.1,3.7,1.2,<0.1,0.1,0.9,0.16,1.6,12.6,1829,70.9,0.81,0.56,0.59,0.35,421,461,0.03,0.13,1.5,1.37,37,2,23,
"Kabanov et al., 2015, GSC OF7948",well,Little Bear N-09,300N096500126300,96E,64.982154,-126.5236909,Hume,,Core,1829.35,N09-1829.35,,2.32,0.33,0.25,0.55,53.54,0.02,0.06,0.02,<0.01,<0.01,<0.002,<20,<1,42.8,99.85,432,0.0432,1,0.7,<0.1,<0.5,0.1,0.2,2.9,<1,714.3,<0.1,0.3,4.5,12,<0.5,3,2.5,1.7,2.2,0.28,1.1,0.22,0.07,0.29,0.05,0.3,0.07,0.21,0.02,0.15,0.02,12.12,0.19,1.8,5.1,1.3,4,9.6,1.4,0.2,0.2,<0.1,<0.1,2,0.02,0.1,<0.5,1829.35,70.6,0.24,0.34,0.42,0.28,442,482,0.01,0.06,0.23,0.17,148,4,122,
"Kabanov et al., 2015, GSC OF7948",well,Little Bear N-09,300N096500126300,96E,64.982154,-126.5236909,Hume,,Core,1830.5,N09-1830.5,,5.42,1.52,0.31,0.74,48.76,0.02,0.22,0.05,<0.01,<0.01,<0.002,58,<1,42.8,99.84,447,0.0447,<1,1.4,0.5,1.4,0.2,0.7,9.7,<1,698.3,<0.1,0.6,5.5,47,<0.5,10.1,1.1,1.8,2.2,0.25,1,0.14,0.02,0.17,0.03,0.14,0.03,0.12,0.02,0.15,0.03,13.96,0.29,10.7,22.6,5.1,9,40,2.4,0.7,0.3,<0.1,<0.1,1.1,0.03,0.1,<0.5,1830.5,70.1,2.15,5.33,0.29,0.26,476,516,0.02,0.65,5.37,4.72,99,0,5,
"Kabanov et al., 2015, GSC OF7948",well,Little Bear N-09,300N096500126300,96E,64.982154,-126.5236909,Hume,,Core,1831.5,N09-1831.5,,1.65,0.27,0.12,0.69,53.56,0.02,0.05,0.02,<0.01,<0.01,<0.002,<20,<1,43.3,99.66,2084,0.2084,<1,0.3,0.1,<0.5,<0.1,0.3,2.2,<1,763.2,<0.1,0,3.1,18,<0.5,3.8,0.9,1.2,1.6,0.16,0.6,0.1,0.02,0.16,0.02,0.13,0.03,0.08,0.01,0.07,<0.01,12.78,0.18,3.4,7.2,1.4,5,10.9,1.6,0.2,0.1,<0.1,<0.1,0.5,<0.01,<0.1,<0.5,1831.5,70.3,0.58,0.8,0.42,0.24,468,508,0.01,0.13,0.95,0.82,84,1,25,
"Kabanov et al., 2015, GSC OF7948",well,Little Bear N-09,300N096500126300,96E,64.982154,-126.5236909,Hume,,Core,1832.5,N09-1832.5,,0.77,0.23,0.12,0.65,54.28,0.02,0.05,0.02,<0.01,<0.01,<0.002,<20,<1,43.7,99.82,539,0.0539,<1,<0.2,0.2,<0.5,<0.1,0.2,2.1,<1,874.6,<0.1,0,2.3,10,<0.5,3.4,0.6,0.8,1.1,0.11,0.4,0.09,0.02,0.1,0.01,0.12,0.02,0.06,<0.01,0.08,0.01,13.32,0.12,2.7,9.6,1.2,4,9.5,1.7,0.3,<0.1,<0.1,<0.1,<0.5,<0.01,<0.1,<0.5,1832.5,70.4,0.34,0.59,0.37,0.18,470,510,0.01,0.09,0.72,0.63,82,1,25,
"Kabanov et al., 2015, GSC OF7948",well,Little Bear N-09,300N096500126300,96E,64.982154,-126.5236909,Hume,,Core,1833.5,N09-1833.5,,0.96,0.47,0.24,1.34,52.84,0.02,0.11,0.04,<0.01,<0.01,<0.002,23,<1,43.5,99.52,2793,0.2793,<1,1,0.2,0.5,0.2,0.6,4.4,<1,997.6,<0.1,0.6,6,25,<0.5,7,0.9,1.4,2.3,0.26,1,0.15,0.02,0.18,0.03,0.15,0.04,0.12,0.02,0.09,0.02,12.98,0.24,3,7.2,1.3,11,13.1,1.8,1.1,0.1,<0.1,<0.1,<0.5,0.02,<0.1,<0.5,1833.5,70.1,0.6,1.7,0.26,0.22,474,514,0.02,0.21,1.93,1.72,88,1,11,
"Kabanov et al., 2015, GSC OF7948",well,Little Bear N-09,300N096500126300,96E,64.982154,-126.5236909,Hume,,Core,1834.5,N09-1834.5,,0.48,0.17,0.07,0.67,54.46,0.03,0.02,0,<0.01,<0.01,<0.002,<20,<1,43.8,99.7,1906,0.1906,<1,0.3,<0.1,<0.5,<0.1,<0.1,0.9,<1,617.1,<0.1,0,1.8,<8,<0.5,1.7,0.3,0.6,0.7,0.06,<0.3,<0.05,<0.02,<0.05,<0.01,0.08,<0.02,<0.03,<0.01,<0.05,<0.01,12.5,0.09,1.5,1.9,0.5,2,4.7,1.3,0.1,<0.1,<0.1,<0.1,1,0.01,<0.1,<0.5,1834.5,70.6,0.14,0.17,0.45,0.16,480,520,0.01,0.04,0.31,0.27,55,3,52,
"Pyle et al., 2011, NWT OR 2011 09",outcrop,Little Bear R.,,96D,64.474801,-126.4862082,Hare Indian,Bluefish,rock chips,,LG10-019,,77.83,6.59,1.45,0.53,0.76,0.1,1.29,0.27,0.1,<0.01,0.008,136,8,,,1961,,2,8,3.3,8.8,1.5,5.2,60,1,190.6,0.4,4,16.6,409,0.8,51.1,31.7,19.4,30.3,4.5,18.9,3.88,0.86,4.16,0.63,3.44,0.75,2.11,0.31,1.95,0.3,5.78,0.62,59.4,56.1,6.5,276,108.4,10,3.4,1.6,0.1,0.3,<0.5,0.11,0.4,4.9,,,1.88,7.4,0.43,0.36,459,498,0.24,0.8,5.69,4.89,130,4,6,
"Pyle et al., 2011, NWT OR 2011 09",outcrop,Little Bear R.,,96D,64.474801,-126.4862082,,Canol,rock chips,,LG10-020,,76.59,6.98,1.76,0.56,0.8,0.11,1.43,0.28,0.11,<0.01,0.009,134,7,,,2017,,2,8.4,3.5,8.9,1.3,5.2,63.5,1,167.4,0.4,4.2,15.9,408,0.8,51.8,26.9,18.7,31.6,4.59,19,3.65,0.84,3.96,0.57,3.28,0.69,1.9,0.27,1.75,0.26,5.96,0.65,64.3,44.5,8,198,101.9,12.1,2.3,1.4,0.1,0.3,<0.5,0.11,0.3,4.2,,,1.89,8.85,0.43,0.34,449,488,0.24,0.92,5.99,5.07,148,4,6,
"Pyle et al., 2011, NWT OR 2011 09",outcrop,Little Bear R.,,96D,64.474801,-126.4862082,Canol,Canol,rock chips,,LG10-021,,77.1,6.08,1.39,1.04,1.76,0.1,1.2,0.25,0.08,<0.01,0.008,117,7,,,1995,,2,4.7,3,7.7,1.3,4.8,54.9,1,250.5,0.4,3.5,11.1,396,0.7,47.1,26.7,17.5,28.4,4.25,17.6,3.59,0.81,3.76,0.56,3.19,0.66,1.94,0.28,1.79,0.28,5.6,0.79,31.5,45.2,6.9,142,91.5,9,3,1.4,0.1,0.3,<0.5,0.11,0.3,3.5,,,1.82,8.12,0.44,0.3,455,494,0.22,0.85,5.55,4.7,146,4,5,
"Pyle et al., 2011, NWT OR 2011 09",outcrop,Little Bear R.,,96D,64.474801,-126.4862082,Canol,Canol,rock chips,,LG10-022,,77.79,7.4,1.53,0.57,0.44,0.15,1.47,0.29,0.08,<0.01,0.008,120,8,,,2159,,2,4.6,3.7,8.6,1.6,5.5,63,1,153,0.3,3.9,13.6,398,0.7,55.8,30,19,33.8,4.84,21.5,4.86,1.16,5.43,0.76,3.92,0.81,2.22,0.31,1.91,0.29,5.12,0.8,41.9,74.6,7.7,117,92.9,10.5,2.4,1.3,0.1,0.3,<0.5,0.09,0.4,3.8,,,0.91,5.22,0.44,0.41,456,495,0.35,0.55,4.82,4.27,108,7,9,
"Pyle et al., 2011, NWT OR 2011 09",outcrop,Little Bear R.,,96D,64.474801,-126.4862082,Canol,Canol,rock chips,,LG10-023,,76.46,7.33,1.17,0.42,0.37,0.24,1.57,0.36,0.07,<0.01,0.007,66,5,,,1942,,2,1.5,3.5,9.6,1.9,6.7,66.5,1,168.9,0.5,4.2,7.8,348,0.9,69.1,13.3,20,36.8,4.75,17.5,1.83,0.31,1.28,0.23,1.53,0.36,1.11,0.18,1.28,0.2,6.53,0.65,46.6,16.8,12.3,14,43,9.3,<0.1,1.4,0.2,0.4,<0.5,0.19,0.2,3.7,,,1.49,8.97,0.44,0.22,452,491,0.25,0.89,7.2,6.31,125,3,3,
"Pyle et al., 2011, NWT OR 2011 09",outcrop,Little Bear R.,,96D,64.474801,-126.4862082,,Canol,rock chips,,LG10-024,,71.33,7.96,2.18,0.91,1.56,0.37,1.76,0.4,0.12,0.01,0.006,69,7,,,1779,,2,7.5,3.7,10.1,2.4,7.8,71.3,1,215.2,0.4,5.6,10.6,196,1.2,80.7,25.7,24.1,47.7,5.73,21.9,3.52,0.76,3.46,0.53,3.18,0.69,1.95,0.28,1.98,0.29,7.35,1.35,39.8,47.2,13.6,77,48.5,13,1.8,1.4,0.2,0.5,<0.5,0.26,0.2,5.4,,,1.92,10.25,0.45,0.27,453,492,0.32,1.04,6.87,5.83,149,5,4,
"Pyle et al., 2011, NWT OR 2011 09",outcrop,Little Bear R.,,96D,64.474801,-126.4862082,Canol,Canol,rock chips,,LG10-025,,54.38,6.87,2.8,0.74,7.2,0.39,1.54,0.35,0.1,0.02,0.006,85,8,,,1528,,2,19.2,3.4,9.3,1.9,6.5,60.7,2,295,0.5,5.5,19.6,122,1.4,68.6,36.3,23.6,41.7,5.59,24.9,5.48,1.35,6.61,0.95,4.87,0.98,2.69,0.37,2.23,0.31,7.44,2.71,43,81.9,11.3,179,102.9,15.3,4.2,0.9,0.3,0.3,<0.5,0.28,<0.1,5.7,,,0.98,8.47,0.45,1.13,458,497,0.54,0.85,7.5,6.65,113,7,15,
"Pyle et al., 2011, NWT OR 2011 09",outcrop,Little Bear R.,,96D,64.474801,-126.4862082,Canol,Canol,rock chips,,LG10-026,,67.29,8.83,1.46,1.49,2.66,0.54,1.97,0.45,0.06,0.02,0.008,29,6,,,2195,,3,1.4,4,11,2.3,8.2,76.6,2,258.8,0.5,4.6,8.6,160,1.5,84.4,13.3,24.2,48.2,5.78,22.1,2.48,0.39,1.45,0.25,1.64,0.38,1.17,0.19,1.48,0.22,7.26,1.04,32.9,11,13.8,7,15.4,5.8,<0.1,1.2,0.3,0.3,<0.5,0.32,0.4,5.8,,,1.44,8.34,0.46,0.29,444,483,0.41,0.85,8.01,7.16,104,5,4,
"Pyle et al., 2011, NWT OR 2011 09",outcrop,Little Bear R.,,96D,64.474801,-126.4862082,Canol,Canol,rock chips,,LG10-027,,61.6,6.14,2.15,1.95,7.6,0.51,1.3,0.3,0.2,0.03,0.006,55,7,,,10015,,2,5.4,2.5,7.6,1.7,5.6,50.3,1,531.5,0.5,3.9,7.6,139,1,60.3,21.1,22.1,42,4.95,19.5,3.07,0.82,2.85,0.45,2.56,0.54,1.62,0.25,1.7,0.26,8.51,1.38,22.4,22.4,7.8,28,35.2,9.3,1,0.8,0.2,0.2,<0.5,0.17,0.2,3.7,,,1.5,8.95,0.46,0.29,450,489,0.28,0.9,6.78,5.88,132,4,4,
"Pyle et al., 2011, NWT OR 2011 09",outcrop,Little Bear R.,,96D,64.474801,-126.4862082,Canol,Canol,rock chips,,LG10-028,,79.38,6.07,0.77,0.28,0.05,0.35,1.26,0.29,0.04,<0.01,0.011,71,4,,,2364,,2,1.8,2.5,8.3,1.5,5.6,53.2,1,118.3,0.4,3.4,7,185,1.2,58.3,8,16.9,32.2,4.06,15.7,1.62,0.29,0.88,0.15,0.97,0.23,0.77,0.13,0.93,0.15,7.24,0.65,35.8,9.7,10.1,5,38.5,4.9,<0.1,1.1,0.2,0.3,<0.5,0.12,0.3,3.3,,,2.05,10.2,0.46,0.23,451,490,0.29,1.05,7.32,6.27,139,4,3,
"Pyle et al., 2011, NWT OR 2011 09",outcrop,Little Bear R.,,96D,64.474801,-126.4862082,,Canol,rock chips,,LG10-029,,77.69,7.13,1.18,0.33,0.09,0.35,1.48,0.35,0.05,<0.01,0.007,58,5,,,4130,,2,2.5,3.1,9.7,1.8,6.9,64.6,1,155.6,0.5,4,8,191,0.9,68.7,10.9,20.9,41.5,5.01,19,2.09,0.34,1.19,0.19,1.25,0.3,0.94,0.17,1.17,0.19,6.16,0.89,36.4,14.8,13.4,6,43.2,9.6,<0.1,1.5,0.3,0.4,<0.5,0.15,0.4,4.5,,,1.95,7.91,0.47,0.25,438,477,0.3,0.85,6.39,5.54,124,5,4,
"Pyle et al., 2011, NWT OR 2011 09",outcrop,Little Bear R.,,96D,64.474801,-126.4862082,Canol,Canol,rock chips,,LG10-030,,74.69,7.79,1.59,0.42,0.72,0.51,1.68,0.4,0.07,<0.01,0.007,78,6,,,3143,,2,3.6,3.2,9.2,2.3,7.4,67.9,1,167.5,0.5,4.7,9.7,212,1,84.1,12.9,23.3,44.3,5.29,19.2,2.4,0.44,1.76,0.27,1.59,0.37,1.16,0.19,1.37,0.21,6.16,1.32,30.7,21.4,13.9,13,39.8,10.5,0.2,1.8,0.2,0.4,<0.5,0.16,0.7,5.3,,,1.66,7.15,0.47,0.28,441,480,0.27,0.76,6.15,5.39,116,4,5,
"Pyle et al., 2011, NWT OR 2011 09",outcrop,Little Bear R.,,96D,64.474801,-126.4862082,Canol,Canol,rock chips,,LG10-031,,73.51,7.71,1.67,0.35,0.69,0.46,1.65,0.38,0.07,<0.01,0.017,54,5,,,13010,,2,5,3.1,10,2,7.9,71.5,2,265.8,0.7,5,9.8,208,1.1,76.9,10.8,23.5,39.2,4.92,19.3,2.22,0.45,1.72,0.25,1.39,0.34,1.12,0.17,1.28,0.18,5.65,1.59,33.2,21.1,10.5,13,43.1,10.6,<0.1,1.3,0.2,0.3,1.2,0.15,0.3,4.4,,,1.47,6.86,0.47,0.22,448,487,0.26,0.72,5.56,4.84,123,5,4,
"Pyle et al., 2011, NWT OR 2011 09",outcrop,Little Bear R.,,96D,64.474801,-126.4862082,Canol,Canol,rock chips,,LG10-032,,75.49,8.34,1.69,0.39,0.23,0.44,1.76,0.42,0.05,<0.01,0.007,73,6,,,2716,,2,6.4,3.7,10.1,2.1,7.5,75.1,2,117.7,0.5,4.8,8,212,1.1,79,12,21.9,43.6,5.13,19.1,2.27,0.38,1.33,0.22,1.5,0.36,1.11,0.19,1.39,0.22,5.47,1.33,34.9,24.1,12.6,13,44.3,10.2,<0.1,1.4,0.3,0.3,<0.5,0.15,0.5,4.3,,,1.37,6.14,0.48,0.18,445,484,0.17,0.65,5.47,4.82,112,3,3,
"Pyle et al., 2011, NWT OR 2011 09",outcrop,Little Bear R.,,96D,64.474801,-126.4862082,Canol,Canol,rock chips,,LG10-033,,70.69,10.26,2.64,0.49,0.13,0.52,2.16,0.51,0.07,<0.01,0.008,91,9,,,2585,,2,16.3,4.7,12.1,2.7,9,94.3,2,136.7,0.7,6.7,15.3,203,1.3,97.8,14,26.2,53.5,6.15,24.6,2.94,0.54,1.94,0.32,1.9,0.43,1.4,0.23,1.59,0.25,6.28,1.93,34.7,48.8,14.3,50,68.3,13.4,0.7,1.6,0.3,0.4,<0.5,0.22,0.3,6.3,,,1.01,8.64,0.48,0.19,452,491,0.23,0.82,7.27,6.45,119,3,3,
"Pyle et al., 2011, NWT OR 2011 09",outcrop,Little Bear R.,,96D,64.474801,-126.4862082,Canol,Canol,rock chips,,LG10-034,,75.16,8.13,3.67,0.41,0.2,0.37,1.71,0.44,0.06,<0.01,0.008,107,8,,,2169,,2,21.1,3.8,9.8,2.8,7.6,74.6,2,106,0.5,6.7,11.6,187,1.1,97.8,13.4,22.4,47.3,5.53,20.5,2.97,0.52,1.95,0.33,1.94,0.43,1.33,0.21,1.5,0.24,4.01,2.77,26.4,64.4,15.8,80,88.7,17.8,1.1,1.4,0.3,0.4,1.2,0.3,1.4,7.5,,,1.8,4.47,0.48,0.11,447,486,0.11,0.53,4.08,3.55,110,3,3,
"Pyle et al., 2011, NWT OR 2011 09",outcrop,Little Bear R.,,96D,64.474801,-126.4862082,Canol,Canol,rock chips,,LG10-035,,72.73,8.92,3.18,0.48,0.51,0.42,1.87,0.48,0.06,<0.01,0.007,80,8,,,7148,,2,14.4,4.1,11,3.2,8.5,82.4,2,261.1,0.6,6.6,9.7,206,0.9,107.6,13.8,24.7,50.3,5.64,20.8,2.7,0.6,1.84,0.31,1.9,0.45,1.39,0.23,1.53,0.23,3.93,2.45,26.4,51.5,15.9,48,68,16.5,0.6,1.3,0.3,0.4,0.7,0.31,1.2,5.5,,,1.49,4.55,0.49,0.11,455,494,0.11,0.52,4.29,3.77,106,3,3,
"Pyle et al., 2011, NWT OR 2011 09",outcrop,Little Bear R.,,96D,64.474801,-126.4862082,Canol,Canol,rock chips,,LG10-036,,83.33,5.39,0.88,0.23,0.43,0.35,1.1,0.27,0.03,<0.01,0.004,<20,4,,,3100,,1,1.7,2.1,6.3,1.8,4.7,46.3,1,123.5,0.4,3.6,5.1,60,0.6,64.1,9,15.8,33.5,3.77,15.5,2.26,0.36,1.25,0.2,1.24,0.28,0.85,0.15,0.97,0.15,3.32,0.93,13.4,9.5,7.9,5,8.6,2.9,<0.1,0.4,0.2,0.2,<0.5,0.21,0.3,1.9,,,1.12,3.33,0.49,0.13,438,477,0.14,0.38,3.59,3.21,93,4,4,
"Pyle et al., 2011, NWT OR 2011 09",outcrop,Little Bear R.,,96D,64.474801,-126.4862082,Canol,Canol,rock chips,,LG10-037,,75.16,9.08,1.3,0.45,0.5,0.51,1.95,0.43,0.04,<0.01,0.007,36,6,,,2726,,2,1.5,3.9,10.8,2.6,8.5,80.4,2,149.5,0.5,6.1,8.6,148,1.1,92.9,13.1,25,51,5.96,22.7,3.11,0.49,1.61,0.26,1.75,0.41,1.3,0.22,1.52,0.23,4.74,1.16,31.3,10.6,13.7,6,17.4,7.6,<0.1,0.8,0.2,0.4,<0.5,0.31,0.4,4.3,,,1.15,4.65,0.49,0.16,445,484,0.21,0.5,4.65,4.15,100,5,3,
"Pyle et al., 2011, NWT OR 2011 09",outcrop,Little Bear R.,,96D,64.474801,-126.4862082,Canol,Canol,rock chips,,LG10-038,,74.38,10.8,1.06,0.61,0.03,0.48,2.31,0.49,0.04,<0.01,0.009,35,8,,,2712,,2,1.3,5,13.2,2.8,9.8,103.9,2,125.1,0.7,6,8.1,237,1,103.6,14.2,26,52.8,6.04,22.3,2.88,0.51,1.69,0.28,1.87,0.43,1.28,0.22,1.55,0.24,4.23,0.77,17.4,8.5,10.7,5,16.8,6,<0.1,0.8,0.2,0.3,<0.5,0.24,0.4,3,,,0.54,3.91,0.5,0.15,451,490,0.18,0.39,3.99,3.6,98,5,4,
"Pyle et al., 2011, NWT OR 2011 09",outcrop,Little Bear R.,,96D,64.474801,-126.4862082,Canol,Canol,rock chips,,LG10-039,,71.89,10.36,2.16,0.68,0.24,0.53,2.25,0.48,0.05,<0.01,0.009,51,8,,,2494,,2,4.1,5.3,13.2,3,8.6,96,2,118.9,0.6,6.3,11.4,316,1.1,97.5,14.1,27.2,52.8,6.46,24.7,3.24,0.52,1.75,0.28,1.83,0.41,1.34,0.23,1.55,0.26,5.4,1.61,36.2,23,11.4,8,35.6,10.2,<0.1,1.2,0.2,0.3,0.7,0.24,0.3,5.2,,,1.68,10.35,0.5,0.17,447,486,0.21,1.02,7.11,6.09,146,3,2,
"Pyle et al., 2011, NWT OR 2011 09",outcrop,Little Bear R.,,96D,64.474801,-126.4862082,Canol,Canol,rock chips,,LG10-040,,79.15,6.06,1.22,0.31,<0.01,0.36,1.21,0.27,0.05,<0.01,0.006,58,5,,,2536,,2,1.6,3.1,8.1,1.3,5,57.1,1,110.3,0.3,4.1,14.2,278,0.9,51.4,9.1,20.5,35.1,4.79,18.8,2.72,0.44,1.43,0.19,1.12,0.24,0.72,0.13,0.95,0.15,6.8,0.92,61.2,14.5,8.8,10,32.6,11.2,<0.1,1.4,0.2,0.3,<0.5,0.17,0.4,5.4,,,2.38,10.59,0.5,0.15,440,479,0.17,1.09,6.85,5.76,155,2,2,
"Pyle et al., 2011, NWT OR 2011 09",outcrop,Little Bear R.,,96D,64.474801,-126.4862082,Canol,Canol,rock chips,,LG10-041,,85.29,4.94,0.99,0.27,<0.01,0.21,1.04,0.25,0.05,<0.01,0.006,37,4,,,2387,,1,1.2,2.3,6.6,1.3,5.1,49.8,1,89.6,0.4,3.5,5.5,697,0.7,56.2,10.2,15.8,28.8,3.91,14.9,2.21,0.36,1.36,0.19,1.25,0.28,0.77,0.13,0.88,0.14,3.55,0.55,34.5,8.2,6,6,25.1,9.9,<0.1,2,<0.1,0.3,<0.5,0.13,0.2,5.1,,,1.18,4.61,0.51,0.17,440,479,0.19,0.5,3.74,3.24,123,5,5,
"Pyle et al., 2011, NWT OR 2011 09",outcrop,Little Bear R.,,96D,64.474801,-126.4862082,Canol,Canol,rock chips,,LG10-042,,80.71,5.5,1.47,0.36,0.4,0.3,1.16,0.26,0.07,<0.01,0.006,60,5,,,2379,,1,2.1,2.4,7.9,1.8,4.4,52.8,1,145.6,0.4,3.5,15.6,476,0.7,57.1,13.1,18,30.7,4.08,16.2,2.68,0.52,2.09,0.29,1.7,0.37,1.08,0.18,1.19,0.18,5.31,0.97,51.2,22.4,7.5,46,36.3,14.8,0.4,2.1,0.1,0.3,<0.5,0.13,0.3,4.8,,,1.51,6.94,0.51,0.17,445,484,0.14,0.72,4.5,3.78,154,3,4,
"Pyle et al., 2011, NWT OR 2011 09",outcrop,Little Bear R.,,96D,64.474801,-126.4862082,Canol,Canol,rock chips,,LG10-043,,75.5,7.5,2.61,0.44,0.04,0.57,1.7,0.39,0.05,<0.01,0.007,31,6,,,2475,,3,5.2,3.7,9.9,2.4,7.7,70.6,1,123.7,0.6,6.1,9.2,254,1.2,89.1,14.1,23.7,42.6,5.52,22.4,3.19,0.53,2.08,0.27,1.8,0.4,1.18,0.22,1.43,0.21,5.85,1.87,31.5,31.7,9,10,30.6,17.5,0.2,1.4,0.2,0.3,<0.5,0.24,0.1,7,,,1.28,9.69,0.51,0.13,450,489,0.14,0.93,8.09,7.16,120,2,2,
"Pyle et al., 2011, NWT OR 2011 09",outcrop,Little Bear R.,,96D,64.474801,-126.4862082,Canol,Canol,rock chips,,LG10-044,,79.37,5.61,1.4,0.32,<0.01,0.36,1.12,0.26,0.03,<0.01,0.005,37,5,,,2304,,2,1.6,2.6,7.4,1.6,4.8,52.8,<1,85.2,0.4,4.4,9,230,0.7,54.7,9.8,18.1,31,4.24,17.2,2.61,0.51,1.64,0.21,1.24,0.26,0.74,0.13,0.95,0.14,6.99,1.17,51.4,14.8,7.4,5,17.7,12,<0.1,1.2,0.2,0.3,<0.5,0.27,0.4,9.1,,,1.49,9.71,0.52,0.14,442,481,0.17,1.01,6.72,5.71,152,3,2,
"Pyle et al., 2011, NWT OR 2011 09",outcrop,Little Bear R.,,96D,64.474801,-126.4862082,Canol,Canol,rock chips,,LG10-045,,84.29,4.23,1.22,0.23,0.08,0.32,0.83,0.2,0.05,<0.01,0.006,46,4,,,2394,,1,2.3,2,5.5,1.1,3.6,37,<1,96.6,0.3,2.8,9.8,313,0.6,41.4,7.4,14.8,25.9,3.74,15.4,2.31,0.39,1.29,0.16,1.03,0.19,0.61,0.1,0.75,0.11,4.55,0.79,61.2,18,5.2,14,30.5,13.4,<0.1,1.3,<0.1,0.3,<0.5,0.15,0.7,7,,,1.49,9.72,0.52,0.13,444,483,0.16,0.66,4.25,3.59,152,4,3,
"Pyle et al., 2011, NWT OR 2011 09",outcrop,Little Bear R.,,96D,64.474801,-126.4862082,Canol,Canol,rock chips,,LG10-046,,82.17,5.59,1,0.32,0.15,0.39,0.96,0.23,0.06,<0.01,0.005,42,5,,,2988,,1,1.1,2.6,7.2,1.2,4.5,48.4,1,107.7,0.3,3.5,8.7,393,0.9,45.5,7.1,15.9,27.9,3.71,15,2.1,0.37,1.29,0.15,0.91,0.2,0.61,0.1,0.76,0.12,5.11,0.72,48.1,14.4,8.3,8,26.1,12.6,<0.1,1.8,0.1,0.3,<0.5,0.17,0.5,4.7,,,1.49,9.73,0.52,0.15,444,483,0.15,0.85,4.89,4.04,166,3,3,
"Pyle et al., 2011, NWT OR 2011 09",outcrop,Little Bear R.,,96D,64.474801,-126.4862082,Canol,Canol,rock chips,,LG10-047,,76.73,8.58,1.18,0.57,0.06,0.58,1.57,0.31,0.04,<0.01,0.008,45,7,,,2444,,2,1.8,4.7,11.5,1.7,5.2,83.7,2,86.3,0.4,4.8,7.3,415,0.9,55,8.2,19,35,4.36,17.2,2.68,0.44,1.47,0.18,1.03,0.22,0.76,0.13,0.97,0.16,5.06,0.88,32.2,17.6,8.6,9,28,13.3,<0.1,1.3,0.2,0.3,<0.5,0.24,0.4,6.2,,,1.5,9.74,0.53,0.14,446,485,0.15,0.77,5.13,4.36,149,3,3,
"Pyle et al., 2011, NWT OR 2011 09",outcrop,Little Bear R.,,96D,64.474801,-126.4862082,Canol,Canol,rock chips,,LG10-048,,78.87,7.1,1.1,0.45,0.14,0.56,1.26,0.3,0.04,<0.01,0.007,45,7,,,2359,,2,1.2,3.7,8.9,1.4,5,65.7,1,87.1,0.4,4.3,8,485,0.7,54.1,7.5,16.8,31.6,3.95,15.7,2.48,0.44,1.55,0.17,0.98,0.21,0.68,0.12,0.86,0.14,5.35,0.86,38.3,14.3,9,9,25.9,11.7,<0.1,2,0.2,0.4,<0.5,0.21,0.7,7.5,,,1.5,9.76,0.53,0.13,445,484,0.14,0.88,5.66,4.78,149,2,2,
"Pyle et al., 2011, NWT OR 2011 09",outcrop,Little Bear R.,,96D,64.474801,-126.4862082,Canol,Canol,rock chips,,LG10-049,,75.91,8.98,1.37,0.64,0.22,0.42,1.67,0.4,0.05,<0.01,0.012,80,8,,,2361,,2,2.4,4.9,10.8,2.3,6.5,83.4,2,103.5,0.5,5.4,8.9,521,1.1,79.9,10.1,19.6,37.5,4.43,15.8,2.71,0.49,1.88,0.23,1.49,0.31,0.95,0.16,1.24,0.19,5.06,0.89,35.3,17.6,8.5,11,34.5,12.4,<0.1,1.4,0.2,0.4,0.8,0.23,0.7,7,,,1.5,9.77,0.53,0.14,455,494,0.18,0.73,5.17,4.44,143,3,3,
"Pyle et al., 2011, NWT OR 2011 09",outcrop,Little Bear R.,,96D,64.474801,-126.4862082,Canol,Canol,rock chips,,LG10-050,,56.47,12.95,2.47,3.74,4.63,0.42,2.53,0.47,0.05,0.04,0.011,68,13,,,3749,,3,3.2,8.5,16.5,2.2,7.5,135.3,2,388.6,0.5,7.1,12.3,442,1,86.1,22.1,25.4,49.9,6.02,23.8,4.46,0.99,4.08,0.58,3.19,0.65,1.86,0.29,1.94,0.29,5.53,0.73,15.6,12.9,7.1,31,32,10.5,0.3,1,0.2,0.2,7,0.16,0.5,3.7,,,1.51,9.78,0.54,0.44,457,496,0.09,0.16,1.44,1.28,90,6,31,
"Pyle et al., 2011, NWT OR 2011 09",outcrop,Little Bear R.,,96D,64.474801,-126.4862082,Canol,Canol,rock chips,,LG10-051,,62.14,17.95,1.84,1.34,0.22,0.92,3.58,0.69,0.06,<0.01,0.015,46,16,,,3712,,3,3.4,12.1,22.7,3.5,10.9,196.2,3,142.4,0.9,10.2,9,393,1.4,119.1,14.2,34.2,69.5,7.73,29.7,4.66,0.84,2.73,0.37,2.17,0.46,1.49,0.26,1.83,0.29,2.76,0.47,8.3,16.5,9.3,15,22.9,11.3,<0.1,0.5,0.2,0.3,1.9,0.14,0.8,4.9,,,1.51,9.79,0.54,0.16,447,486,0.15,0.2,2.52,2.32,79,6,6,
"Pyle et al., 2011, NWT OR 2011 09",outcrop,Little Bear R.,,96D,64.474801,-126.4862082,Canol,Canol,rock chips,,LG10-052,,69.18,12.85,2.11,0.96,0.17,0.57,2.63,0.59,0.07,<0.01,0.012,68,12,,,2332,,2,4.5,7.9,17.5,3.1,9.7,133.4,3,125.9,0.7,8.7,9,530,1.1,107.6,13.5,28.8,57.4,6.5,25.3,4.15,0.72,2.48,0.34,2.01,0.44,1.41,0.24,1.62,0.26,3.85,0.7,20.6,48.5,9.9,28,45.6,15.5,0.2,1.7,0.2,0.4,1.6,0.14,0.5,5.3,,,1.51,9.8,0.54,0.13,449,488,0.12,0.52,4.17,3.65,123,3,3,
"Pyle et al., 2011, NWT OR 2011 09",outcrop,Little Bear R.,,96A,64.476035,-126.4822447,Canol,Canol,rock chips,,RL10-001,,64.26,9.86,3.79,0.8,0.43,0.72,1.91,0.46,0.1,0.01,0.01,87,11,,,2260,,2,10.1,5.5,12.2,2.2,8,92,2,173.8,0.6,7.5,20.9,199,1.2,86.8,16.9,27.6,61.1,7.05,28.9,5.4,1.04,3.77,0.46,2.57,0.53,1.41,0.25,1.66,0.25,6.41,2.62,26.5,75.3,14.8,78,73.6,16.9,0.6,1.3,0.4,0.4,0.8,0.45,0.5,8.4,,,1.52,9.81,0.55,0.38,437,476,0.33,0.36,5.43,5.07,56,6,7,
"Kabanov et al. 2016a, GSC OF7951",well,Loon Creek O-06,300O066510127000 ,96E,65.097636,-127.0085301,Imperial,Canyon,Core,1622.1,O-06-1622.1,Rock Pulp,73.74,8.29,3.58,1.44,1.76,0.46,1.48,0.41,0.07,0.02,0.007,65,8,8.5,99.73,1536,,2,13.9,3.1,11,2.4,6.8,67.9,2,120.6,0.5,8.2,5.3,167,0.8,79.6,16.4,21.2,37.6,4.68,17.3,3.36,0.74,3.16,0.49,2.93,0.56,1.64,0.24,1.52,0.28,3.34,1.31,11.4,58.4,17.6,91,44.4,13.6,1.6,2.3,0.4,0.2,4.5,0.24,1.2,1.9,,69.7,2.59,3.15,0.45,0.17,461,500,0.04,0.49,2.59,2.1,122,2,7,0.69
"Kabanov et al. 2016a, GSC OF7951",well,Loon Creek O-06,300O066510127000 ,96E,65.097636,-127.0085301,Imperial,Canyon,Core,1622.6,O-06-1622.6,Rock Pulp,67.68,10.28,5.02,1.84,2.31,0.62,1.93,0.56,0.09,0.03,0.009,91,11,9.3,99.65,1745,,4,19.3,4.9,12.8,3,8.1,87.2,1,149.9,0.6,7.8,6.9,250,1.2,104,21.3,25.5,47.1,5.67,22.2,4.09,0.92,3.92,0.59,3.67,0.67,2.02,0.31,2.08,0.31,3.2,2.01,17.2,70.1,19.2,149,70.7,24,2.4,3.4,0.3,0.3,4.4,0.28,1.9,4.6,,70.7,2.11,2.58,0.45,0.2,456,495,0.04,0.4,2.25,1.85,115,2,9,0.89
"Kabanov et al. 2016a, GSC OF7951",well,Loon Creek O-06,300O066510127000 ,96E,65.097636,-127.0085301,Imperial,Canyon,Core,1623.2,O-06-1623.1,Rock Pulp,64.48,13.6,4.97,1.53,1.15,0.74,2.21,0.68,0.11,0.03,0.011,111,12,10.1,99.63,1720,,2,19,5.8,14.6,4.8,10,97.8,2,144.5,0.8,12.9,6.8,346,1.2,140.8,23.5,29.9,52.7,6.54,24.6,4.52,0.87,3.97,0.63,3.75,0.75,2.16,0.35,2.19,0.35,3.2,2.26,14,87.3,22.1,196,83,23.7,3.6,4.1,0.4,0.4,6.5,0.3,2.4,5.7,,70.6,2.02,3.14,0.39,0.14,460,499,0.03,0.44,2.68,2.24,117,1,5,0.45
[truncated: 463,920 more chars]
